# Supplementary material for: PQR309 Is a Novel Dual PI3K/mTOR Inhibitor with Preclinical Antitumor Activity in Lymphomas as a Single Agent and in Combination Therapy
Source: Oxford University Press journal article supplement (doi:10.1158/1078-0432.ccr-17-1041), 2017-10-24
Supplement: 10780432ccr171041-sup-181771_2_supp_4322357_cxm7fb.xlsx [file 10780432ccr171041-sup-181771_2_supp_4322357_cxm7fb.xlsx]

## Sheet: Sheet1
Table S3A
NAME	NES	NOM p-val	FDR q-val
BLIMP_BCELL_REPRESSED	2.46256	0	0
KLEIN_PRIMARY_EFFUSION_LYMPHOMA_DN	2.43082	0	0
GC_B_CELL_BL_EQUAL_DLBCL	2.385	0	0
GC_B_CELL_U133PLUS	2.36425	0	0
BLOOD_MODULE-1.3_B_CELLS	2.27808	0	0
LEE_DIFFERENTIATING_T_LYMPHOCYTE	2.26545	0	0
RESTING_BLOOD_B_CELL_GNF	2.23824	0	0
ODONNELL_TARGETS_OF_MYC_AND_TFRC_UP	2.17019	0	0.000756
GC_T_HELPER_UP4X_CHTANOVA	2.16765	0	0
GC_T_HELPER_UP2X_CHTANOVA	2.15728	0	0
GERMINAL_CENTER_BCELL_DLBCL	2.15412	0	0
HEMATOPOIETIC_NODE1658	2.15208	0	0
JAATINEN_HEMATOPOIETIC_STEM_CELL_DN	2.15126	0	0.000567
TCELL_CYTOKINE_REPRESSED	2.1289	0	0
IL6_LY10_UP_ALL	2.12868	0	0
MORI_LARGE_PRE_BII_LYMPHOCYTE_DN	2.11103	0	0.000454
WANG_RESPONSE_TO_GSK3_INHIBITOR_SB216763_UP	2.10623	0	0.000575
MYC_CHIP_PET_EXPR_DOWN	2.10432	0	0
QI_PLASMACYTOMA_UP	2.10129	0	0.000493
MORI_MATURE_B_LYMPHOCYTE_UP	2.09891	0	0.000431
SMIRNOV_RESPONSE_TO_IR_6HR_DN	2.08722	0	0.000383
YU_MYC_TARGETS_DN	2.08717	0	0.000345
REACTOME_ANTIGEN_ACTIVATES_B_CELL_RECEPTOR_LEADING_TO_GENERATION_OF_SECOND_MESSENGERS	2.07776	0	0
SMID_BREAST_CANCER_NORMAL_LIKE_UP	2.06746	0	0.000314
PID_BCR_5PATHWAY	2.06668	0	0
ZHAN_MULTIPLE_MYELOMA_CD2_UP	2.06341	0	0.000288
MYELOMA_CD-2_SUBGROUP_UP	2.03781	0	0
TONKS_TARGETS_OF_RUNX1_RUNX1T1_FUSION_MONOCYTE_DN	2.03413	0	0.000441
STAT3_UP_OCILY10	2.03179	0	9.64e-05
MORI_PRE_BI_LYMPHOCYTE_DN	2.03059	0	0.00041
JAK_IL10_LY10_UP	2.02981	0	9e-05
B_CELL_UP_ANERGY	2.02196	0	8.43e-05
MORI_IMMATURE_B_LYMPHOCYTE_UP	2.01235	0	0.00046
HOEBEKE_LYMPHOID_STEM_CELL_UP	2.00771	0	0.000576
REACTOME_INTEGRIN_CELL_SURFACE_INTERACTIONS	2.00632	0	0.00149336
KEGG_LEUKOCYTE_TRANSENDOTHELIAL_MIGRATION	2.00435	0	0.00112002
GENTILE_UV_RESPONSE_CLUSTER_D6	2.00206	0	0.000747
REACTOME_CHOLESTEROL_BIOSYNTHESIS	1.99657	0	0.00134776
THYMIC_DP_TCELL_GT_THYMIC_PROGENITOR_TCELL	1.99452	0	7.94e-05
TCELL_PIIND_CSADOWN4X	1.99175	0	7.5e-05
KIM_GERMINAL_CENTER_T_HELPER_UP	1.98735	0	0.00102203
RUTELLA_RESPONSE_TO_HGF_DN	1.9861	0	0.00102978
KEGG_B_CELL_RECEPTOR_SIGNALING_PATHWAY	1.98595	0	0.00185927
GARCIA_TARGETS_OF_FLI1_AND_DAX1_UP	1.96643	0	0.00184205
CLL_MUTATED_GT_CLL_UNMUTATED	1.96634	0	0.000142
ZHAN_LATE_DIFFERENTIATION_GENES_DN	1.95912	0	0.00213339
ST_GRANULE_CELL_SURVIVAL_PATHWAY	1.95554	0	0.0046862
CHIANG_LIVER_CANCER_SUBCLASS_CTNNB1_DN	1.95317	0	0.00245249
DIRMEIER_LMP1_RESPONSE_EARLY	1.94117	0	0.00329583
GARGALOVIC_RESPONSE_TO_OXIDIZED_PHOSPHOLIPIDS_GREY_UP	1.93856	0	0.00359232
CB_1P33_UP	1.93638	0	0.000808
MCL_GT_SLL_DLBCL	1.93506	0	0.000834
RHEIN_ALL_GLUCOCORTICOID_THERAPY_UP	1.93421	0	0.00391108
CD40_DOWNREGULATED_BURKITT_LYMPHOMA	1.93279	0	0.000857
IL10_OCILY3_UP	1.93224	0	0.000819
BASSO_CD40_SIGNALING_DN	1.93142	0	0.00407027
PID_EPHRINB_REV_PATHWAY	1.92429	0	0.00765704
REACTOME_REGULATION_OF_KIT_SIGNALING	1.92361	0.00196078	0.00680626
WIERENGA_STAT5A_TARGETS_DN	1.9215	0	0.00506809
TCELL_PIREP4X_FESKE_FIG4	1.91498	0	0.000785
REACTOME_REGULATION_OF_SIGNALING_BY_CBL	1.90945	0	0.00872993
HUTTMANN_B_CLL_POOR_SURVIVAL_DN	1.90839	0	0.00607605
KEGG_CHEMOKINE_SIGNALING_PATHWAY	1.90446	0	0.0087552
VECCHI_GASTRIC_CANCER_EARLY_DN	1.90416	0	0.00633962
NFKB_UP_ALL_OCILY3_LY10	1.9039	0	0.000867
LINDSTEDT_DENDRITIC_CELL_MATURATION_D	1.89977	0	0.00692876
NAKAMURA_ADIPOGENESIS_EARLY_UP	1.89804	0	0.00688962
HOLLMANN_APOPTOSIS_VIA_CD40_UP	1.89728	0	0.00681777
PID_CXCR4_PATHWAY	1.89629	0	0.00934179
TCELL_PIIND_CALCIUMDEFPTDOWN4X_FESKE_FIG6	1.89447	0	0.000986
KIM_MYCN_AMPLIFICATION_TARGETS_DN	1.89422	0	0.00726954
HALLMARK_ALLOGRAFT_REJECTION	1.89413	0	0.00125
LINDGREN_BLADDER_CANCER_CLUSTER_2B	1.89213	0	0.00732594
TARTE_PLASMA_CELL_VS_B_LYMPHOCYTE_DN	1.89035	0	0.00727963
WATANABE_COLON_CANCER_MSI_VS_MSS_UP	1.88836	0	0.00743049
MARSON_FOXP3_TARGETS_DN	1.88759	0	0.00729356
LOPES_METHYLATED_IN_COLON_CANCER_UP	1.88643	0	0.00725311
PID_ALPHA_SYNUCLEIN_PATHWAY	1.88299	0.00383142	0.0122336
KIM_WT1_TARGETS_UP	1.88214	0	0.00744937
SHIN_B_CELL_LYMPHOMA_CLUSTER_9	1.87966	0	0.00766669
GUTIERREZ_CHRONIC_LYMPHOCYTIC_LEUKEMIA_DN	1.87943	0	0.00750752
FULCHER_INFLAMMATORY_RESPONSE_LECTIN_VS_LPS_DN	1.8767	0	0.00765709
TONKS_TARGETS_OF_RUNX1_RUNX1T1_FUSION_GRANULOCYTE_DN	1.87413	0.00198807	0.00772168
PID_FCER1_PATHWAY	1.8741	0	0.0132188
TCELL_PIREP_CALCIUMDEFPTUP4X_FESKE_FIG6	1.86995	0	0.00133518
PID_CD8_TCR_PATHWAY	1.86629	0	0.0136127
ST_DIFFERENTIATION_PATHWAY_IN_PC12_CELLS	1.86455	0	0.0129028
REACTOME_SIGNAL_AMPLIFICATION	1.86332	0.0018315	0.0123433
KIM_MYC_AMPLIFICATION_TARGETS_DN	1.86163	0	0.00937541
PID_PI3KCI_PATHWAY	1.85814	0	0.0131027
WINNEPENNINCKX_MELANOMA_METASTASIS_DN	1.85647	0	0.0102633
TONKS_TARGETS_OF_RUNX1_RUNX1T1_FUSION_HSC_UP	1.85634	0	0.0100646
WANG_IMMORTALIZED_BY_HOXA9_AND_MEIS1_DN	1.85551	0	0.00994742
T_NK_NODE5808	1.85537	0	0.00152462
HAHTOLA_SEZARY_SYNDROM_DN	1.8536	0	0.0101234
HADDAD_T_LYMPHOCYTE_AND_NK_PROGENITOR_DN	1.85319	0	0.00994091
CD8_T_EFFECTORDN_MEMORYIM_NAIVEUP	1.85112	0	0.00165825
VALK_AML_CLUSTER_11	1.84944	0.0019084	0.0104746
OSWALD_HEMATOPOIETIC_STEM_CELL_IN_COLLAGEN_GEL_DN	1.84822	0	0.0105388
POOLA_INVASIVE_BREAST_CANCER_UP	1.84561	0	0.0108452
REN_ALVEOLAR_RHABDOMYOSARCOMA_UP	1.84426	0	0.0110308
MCLACHLAN_DENTAL_CARIES_UP	1.84264	0	0.0111671
VILIMAS_NOTCH1_TARGETS_UP	1.84173	0	0.0111127
STEARMAN_TUMOR_FIELD_EFFECT_UP	1.84135	0.00378072	0.0109553
REACTOME_INHIBITION_OF_INSULIN_SECRETION_BY_ADRENALINE_NORADRENALINE	1.83883	0	0.0173219
REACTOME_IMMUNOREGULATORY_INTERACTIONS_BETWEEN_A_LYMPHOID_AND_A_NON_LYMPHOID_CELL	1.83815	0	0.0166844
PID_INTEGRIN_CS_PATHWAY	1.83473	0	0.0164349
LENAOUR_DENDRITIC_CELL_MATURATION_UP	1.83368	0	0.0121489
GERMINAL_CENTER_B_CELL_DLBCL_SURVIVAL_PREDICTOR	1.83095	0	0.00243641
PID_TCR_PATHWAY	1.83073	0.00189753	0.0172407
NADLER_OBESITY_UP	1.83053	0	0.0124321
TGFBETA_DOWN_EPITHELIAL_LARGE	1.82787	0	0.00260969
PID_TXA2PATHWAY	1.82643	0	0.0178683
PICCALUGA_ANGIOIMMUNOBLASTIC_LYMPHOMA_DN	1.82632	0	0.0132485
MARSON_FOXP3_CORE_DIRECT_TARGETS	1.82559	0	0.0132383
NOTCH_T-ALL_DOWN_SHARMA	1.82547	0.0019802	0.00257137
NAGASHIMA_EGF_SIGNALING_UP	1.82511	0.00191571	0.0130785
NFKB_UP_OCILY10_ONLY	1.82482	0.00410678	0.00249345
GAVIN_PDE3B_TARGETS	1.82451	0	0.0129979
CHANG_POU5F1_TARGETS_UP	1.82437	0	0.0128096
MARKEY_RB1_ACUTE_LOF_DN	1.82319	0	0.0129165
FLECHNER_BIOPSY_KIDNEY_TRANSPLANT_REJECTED_VS_OK_UP	1.82303	0	0.0128069
QUIESCENCE_HEME_CLUSTER1	1.82213	0	0.00249616
BILBAN_B_CLL_LPL_UP	1.82187	0	0.012891
MARSON_FOXP3_TARGETS_STIMULATED_UP	1.81941	0	0.0132148
AKL_HTLV1_INFECTION_DN	1.81881	0.0035524	0.0131561
PID_EPHA_FWDPATHWAY	1.81673	0.00190476	0.0202512
SANSOM_APC_TARGETS_DN	1.81549	0	0.0137803
PID_NECTIN_PATHWAY	1.81539	0	0.0196701
HALLMARK_KRAS_SIGNALING_UP	1.81457	0	0.00120192
BIOCARTA_EDG1_PATHWAY	1.81435	0.00194553	0.0193075
SERUM_RESPONSE_FB_DOWN	1.81376	0	0.00295819
BIOCARTA_BCR_PATHWAY	1.81227	0.00189036	0.0189733
NIKOLSKY_BREAST_CANCER_19Q13.1_AMPLICON	1.80997	0	0.0148129
SHEDDEN_LUNG_CANCER_GOOD_SURVIVAL_A5	1.80944	0	0.0147007
HADDAD_B_LYMPHOCYTE_PROGENITOR	1.8094	0	0.0145125
GC_B_CELL_BLLOW_DLBCLHIGH	1.80919	0	0.00316772
THEILGAARD_NEUTROPHIL_AT_SKIN_WOUND_DN	1.80865	0	0.014455
ODONNELL_TFRC_TARGETS_UP	1.80739	0	0.014525
GC_T_HELPER_UP_KIM	1.80726	0	0.00318566
HOFFMANN_SMALL_PRE_BII_TO_IMMATURE_B_LYMPHOCYTE_UP	1.80556	0	0.0148353
BURTON_ADIPOGENESIS_9	1.80498	0	0.0146851
ZHAN_MULTIPLE_MYELOMA_CD1_VS_CD2_DN	1.80444	0	0.0146288
HERNANDEZ_MITOTIC_ARREST_BY_DOCETAXEL_2_DN	1.80347	0.00195695	0.0146766
KEGG_T_CELL_RECEPTOR_SIGNALING_PATHWAY	1.80044	0	0.0228114
REACTOME_ADP_SIGNALLING_THROUGH_P2RY1	1.7997	0	0.0222995
BOHN_PRIMARY_IMMUNODEFICIENCY_SYNDROM_DN	1.79873	0	0.0154625
WALLACE_PROSTATE_CANCER_RACE_UP	1.79849	0	0.0153129
RIZ_ERYTHROID_DIFFERENTIATION_12HR	1.79635	0	0.0155649
SCHMIDT_POR_TARGETS_IN_LIMB_BUD_UP	1.79579	0	0.0155441
ST_G_ALPHA_S_PATHWAY	1.79551	0.00388349	0.0228014
SHIPP_DLBCL_VS_FOLLICULAR_LYMPHOMA_DN	1.79487	0.00193798	0.0155504
SETLUR_PROSTATE_CANCER_TMPRSS2_ERG_FUSION_DN	1.79421	0.00194932	0.015461
KEGG_NATURAL_KILLER_CELL_MEDIATED_CYTOTOXICITY	1.79411	0	0.0225442
PLASARI_TGFB1_SIGNALING_VIA_NFIC_10HR_DN	1.79299	0.00196078	0.0155493
TAKEDA_TARGETS_OF_NUP98_HOXA9_FUSION_6HR_DN	1.79284	0.004	0.0154085
ST_ADRENERGIC	1.78983	0	0.0233312
REACTOME_INWARDLY_RECTIFYING_K_CHANNELS	1.78902	0.00393701	0.0228648
PENG_RAPAMYCIN_RESPONSE_UP	1.78879	0	0.0163154
MARTIN_INTERACT_WITH_HDAC	1.78865	0	0.016169
SIG_BCR_SIGNALING_PATHWAY	1.7886	0	0.0223271
IL6_LY10_UP_GROUP1	1.78682	0	0.00411083
REACTOME_GENERIC_TRANSCRIPTION_PATHWAY	1.78653	0	0.0223393
FRASOR_RESPONSE_TO_ESTRADIOL_DN	1.78406	0	0.0172147
GC_T_HELPER_UP_CHTANOVA_AND_KIM	1.78405	0.004	0.00407035
WINTER_HYPOXIA_DN	1.78265	0	0.0172387
BIOCARTA_SPPA_PATHWAY	1.78252	0.00375234	0.0226317
ZHAN_EARLY_DIFFERENTIATION_GENES_DN	1.78056	0.00582524	0.0174268
VILIMAS_NOTCH1_TARGETS_DN	1.78002	0.00391389	0.0173362
REACTOME_INTERFERON_GAMMA_SIGNALING	1.7795	0	0.0229692
FARDIN_HYPOXIA_11	1.77887	0.00194932	0.0174104
LU_EZH2_TARGETS_DN	1.77719	0	0.0176406
MYD88_ALL_DOWN	1.77555	0	0.00435688
PID_IL2_1PATHWAY	1.77474	0	0.0242165
TCELL_PIREP_CSAUP4X	1.77462	0.00194932	0.00428176
RUTELLA_RESPONSE_TO_HGF_VS_CSF2RB_AND_IL4_DN	1.77266	0	0.0185304
MARTORIATI_MDM4_TARGETS_NEUROEPITHELIUM_DN	1.77205	0	0.0184935
REACTOME_REGULATION_OF_INSULIN_SECRETION_BY_GLUCAGON_LIKE_PEPTIDE1	1.76885	0	0.0258234
PRAMOONJAGO_SOX4_TARGETS_UP	1.7647	0	0.0203408
RODRIGUES_NTN1_AND_DCC_TARGETS	1.76403	0.00397614	0.0203336
BROWNE_HCMV_INFECTION_6HR_DN	1.76221	0	0.0206626
REACTOME_INHIBITION_OF_VOLTAGE_GATED_CA2_CHANNELS_VIA_GBETA_GAMMA_SUBUNITS	1.76113	0.00400802	0.0282174
HIF1ALPHA_2X_UP	1.76087	0.00561798	0.00489457
SENESE_HDAC1_TARGETS_DN	1.76079	0	0.020824
REACTOME_PLATELET_HOMEOSTASIS	1.76036	0	0.0278057
HELLER_HDAC_TARGETS_SILENCED_BY_METHYLATION_UP	1.76029	0	0.0207551
ZHAN_MULTIPLE_MYELOMA_DN	1.7576	0	0.021364
REACTOME_IL_3_5_AND_GM_CSF_SIGNALING	1.75754	0	0.0279572
TCELL_PIREP4X_FESKE_FIG6	1.75629	0	0.00511401
PECE_MAMMARY_STEM_CELL_DN	1.75593	0	0.0216008
ST_T_CELL_SIGNAL_TRANSDUCTION	1.75567	0	0.0278353
PHONG_TNF_TARGETS_UP	1.75558	0	0.0214593
ALCALAY_AML_BY_NPM1_LOCALIZATION_UP	1.75395	0	0.021747
ZHENG_BOUND_BY_FOXP3	1.75367	0	0.0216395
PLASARI_NFIC_TARGETS_BASAL_DN	1.7535	0.00588235	0.0214589
REACTOME_COSTIMULATION_BY_THE_CD28_FAMILY	1.7532	0	0.0282928
CB_1P5_UP	1.75157	0	0.0054821
MYELOMA_LB_SUBGROUP_UP	1.75046	0	0.00538626
BIOCARTA_IL12_PATHWAY	1.74979	0.00592885	0.0291049
PID_P38_ALPHA_BETA_PATHWAY	1.74854	0.00404858	0.0289708
PID_AVB3_INTEGRIN_PATHWAY	1.74846	0	0.0284273
HALLMARK_TNFA_SIGNALING_VIA_NFKB	1.74433	0	0.00644986
PID_AMB2_NEUTROPHILS_PATHWAY	1.74359	0	0.0298515
LU_IL4_SIGNALING	1.74284	0.00183486	0.0244722
FOSTER_TOLERANT_MACROPHAGE_DN	1.74268	0	0.0242791
TCELL_PIREP_CALCIUMDEFPTUP4X_FESKE_FIG4	1.74062	0.00195695	0.006484
PASQUALUCCI_LYMPHOMA_BY_GC_STAGE_DN	1.74021	0	0.0247376
FOSTER_KDM1A_TARGETS_UP	1.73741	0	0.0253406
REACTOME_G_BETA_GAMMA_SIGNALLING_THROUGH_PLC_BETA	1.73586	0.00403226	0.0327136
PID_CD8_TCR_DOWNSTREAM_PATHWAY	1.73548	0	0.0321505
SCHWAB_TARGETS_OF_BMYB_POLYMORPHIC_VARIANTS_DN	1.73538	0.00390625	0.0258432
HOWLIN_PUBERTAL_MAMMARY_GLAND	1.73459	0	0.0259412
ABC_GT_GCB_AFFY	1.73449	0.00982318	0.00665617
PID_NFKAPPAB_ATYPICAL_PATHWAY	1.73449	0	0.0317635
HELLER_SILENCED_BY_METHYLATION_UP	1.73335	0	0.0263175
REACTOME_ACTIVATION_OF_KAINATE_RECEPTORS_UPON_GLUTAMATE_BINDING	1.73307	0	0.0316537
SENGUPTA_NASOPHARYNGEAL_CARCINOMA_WITH_LMP1_DN	1.73173	0	0.026666
KRAS_UP	1.7303	0.00188679	0.00673973
WANG_LSD1_TARGETS_DN	1.72944	0.00193424	0.027139
GREENBAUM_E2A_TARGETS_DN	1.72903	0	0.027104
SABATES_COLORECTAL_ADENOMA_DN	1.72892	0	0.026952
REACTOME_THROMBIN_SIGNALLING_THROUGH_PROTEINASE_ACTIVATED_RECEPTORS_PARS	1.7289	0.00187617	0.0333351
CC_1P5_UP	1.72858	0	0.00668506
WILENSKY_RESPONSE_TO_DARAPLADIB	1.72818	0.00378788	0.0269573
ZHAN_MULTIPLE_MYELOMA_LB_UP	1.72714	0.00389864	0.0270107
QUIESCENCE_HEME_ALL	1.72622	0	0.0067077
CLL_BCR_CROSSLINKING_UP	1.72567	0.00378788	0.00669717
PID_AR_TF_PATHWAY	1.72237	0.00187266	0.0352211
PID_RET_PATHWAY	1.72173	0	0.0348686
CHANG_CORE_SERUM_RESPONSE_DN	1.72164	0	0.0286454
ZHENG_RESPONSE_TO_ARSENITE_DN	1.71976	0.00400802	0.0292266
SWEET_KRAS_TARGETS_UP	1.71932	0.00183823	0.0291478
REACTOME_GLUCAGON_TYPE_LIGAND_RECEPTORS	1.71776	0.00583658	0.0364007
REACTOME_PLATELET_ACTIVATION_SIGNALING_AND_AGGREGATION	1.71619	0	0.0365013
GAVIN_FOXP3_TARGETS_CLUSTER_P4	1.7158	0.0018797	0.0302621
REACTOME_PLATELET_AGGREGATION_PLUG_FORMATION	1.71277	0.00191939	0.0374523
KEGG_ADHERENS_JUNCTION	1.71251	0.00187266	0.0370307
REACTOME_GPVI_MEDIATED_ACTIVATION_CASCADE	1.71184	0.00184162	0.0367751
ZHOU_INFLAMMATORY_RESPONSE_FIMA_DN	1.70974	0	0.0324506
VERHAAK_AML_WITH_NPM1_MUTATED_DN	1.70943	0	0.0323837
WIERENGA_STAT5A_TARGETS_UP	1.70787	0	0.0327991
LIAN_LIPA_TARGETS_6M	1.70786	0	0.0325517
BLOOD_MODULE-3.8_UNDETERMINED	1.70709	0	0.00843521
REACTOME_ADP_SIGNALLING_THROUGH_P2RY12	1.70692	0.0121212	0.0384435
CD40_UPREGULATED_BURKITT_LYMPHOMA	1.70691	0	0.00827606
CASORELLI_ACUTE_PROMYELOCYTIC_LEUKEMIA_UP	1.70682	0	0.0328228
KEGG_CELL_ADHESION_MOLECULES_CAMS	1.70613	0	0.0380632
REACTOME_RAP1_SIGNALLING	1.7061	0.0020284	0.0374948
REACTOME_INTEGRIN_ALPHAIIB_BETA3_SIGNALING	1.70604	0.0020202	0.0369089
APPEL_IMATINIB_RESPONSE	1.70541	0.00757576	0.0330472
REACTOME_CTLA4_INHIBITORY_SIGNALING	1.70209	0.00402414	0.0376877
KEGG_STEROID_BIOSYNTHESIS	1.70089	0.00623701	0.037598
ENK_UV_RESPONSE_EPIDERMIS_DN	1.70025	0	0.0349577
CROONQUIST_NRAS_SIGNALING_UP	1.70022	0.00185874	0.0347102
KORKOLA_SEMINOMA_UP	1.6984	0.00376648	0.0351686
REACTOME_NCAM_SIGNALING_FOR_NEURITE_OUT_GROWTH	1.69782	0.00192308	0.0385288
REACTOME_PLATELET_SENSITIZATION_BY_LDL	1.69606	0.00865801	0.0388797
BASSO_CD40_SIGNALING_UP	1.69586	0	0.0359035
BLOOD_MODULE-2.8_T_CELLS	1.69585	0	0.0089697
REACTOME_GLYCOLYSIS	1.69568	0.00199203	0.0385627
DUTERTRE_ESTRADIOL_RESPONSE_6HR_DN	1.69519	0.00184162	0.0359098
PID_AR_NONGENOMIC_PATHWAY	1.69458	0.00576923	0.0385328
PID_FAS_PATHWAY	1.69383	0	0.0384074
STAMBOLSKY_RESPONSE_TO_VITAMIN_D3_DN	1.69305	0.00772201	0.0365336
NAKAYAMA_FRA2_TARGETS	1.69275	0	0.0364512
ROYLANCE_BREAST_CANCER_16Q_COPY_NUMBER_UP	1.69061	0.00383142	0.0371852
VALK_AML_CLUSTER_3	1.68985	0.00387597	0.0372571
REACTOME_GRB2_SOS_PROVIDES_LINKAGE_TO_MAPK_SIGNALING_FOR_INTERGRINS_	1.68907	0.0102669	0.040184
LEE_NEURAL_CREST_STEM_CELL_DN	1.68842	0.00184843	0.0377982
REACTOME_G_ALPHA1213_SIGNALLING_EVENTS	1.68578	0	0.0409687
REACTOME_AXON_GUIDANCE	1.6847	0	0.0409845
CLL_BCR_CROSSLINKING_UP_LYMPH_NODE_UP	1.68344	0.010929	0.010165
BILD_CTNNB1_ONCOGENIC_SIGNATURE	1.68282	0.00188679	0.0401031
PID_GLYPICAN_1PATHWAY	1.68224	0.00402414	0.0414645
REACTOME_PROSTACYCLIN_SIGNALLING_THROUGH_PROSTACYCLIN_RECEPTOR	1.68068	0.011811	0.0418023
TCELL_CYTOKINE_INDUCED_PMBCONLY_IINDUCED	1.68025	0.00190114	0.0103618
REACTOME_THROMBOXANE_SIGNALLING_THROUGH_TP_RECEPTOR	1.68017	0.00976562	0.0414351
TSAI_RESPONSE_TO_IONIZING_RADIATION	1.6791	0	0.0416316
PID_INTEGRIN_A9B1_PATHWAY	1.67901	0.00606061	0.0415419
WANG_SMARCE1_TARGETS_UP	1.67861	0	0.0416294
FINETTI_BREAST_CANCER_KINOME_GREEN	1.67515	0.00806452	0.0430528
HALLMARK_CHOLESTEROL_HOMEOSTASIS	1.67484	0.00179856	0.00994269
RESTING_BLOOD_NK_CELL_GNF	1.67406	0.0037594	0.0108544
DEURIG_T_CELL_PROLYMPHOCYTIC_LEUKEMIA_DN	1.67368	0	0.0434845
CHIARETTI_T_ALL_RELAPSE_PROGNOSIS	1.67358	0	0.0432339
PID_PDGFRB_PATHWAY	1.67211	0.00181159	0.044593
REACTOME_HEMOSTASIS	1.67083	0	0.0445789
SEKI_INFLAMMATORY_RESPONSE_LPS_UP	1.67081	0.00196464	0.0442938
PID_IL4_2PATHWAY	1.6707	0.00373134	0.0440705
PARK_TRETINOIN_RESPONSE_AND_RARA_PLZF_FUSION	1.67053	0.00967118	0.0441267
LIAN_LIPA_TARGETS_3M	1.66963	0.00183486	0.0442707
ROSS_AML_OF_FAB_M7_TYPE	1.66746	0	0.0450878
JECHLINGER_EPITHELIAL_TO_MESENCHYMAL_TRANSITION_DN	1.66744	0.00364299	0.0447892
HOOI_ST7_TARGETS_DN	1.66707	0	0.0446453
LEE_EARLY_T_LYMPHOCYTE_DN	1.66672	0.00562852	0.0445184
TAKEDA_TARGETS_OF_NUP98_HOXA9_FUSION_6HR_UP	1.66646	0.00189753	0.0443119
RIGGINS_TAMOXIFEN_RESISTANCE_DN	1.66625	0	0.0441149
AMIT_EGF_RESPONSE_40_HELA	1.66535	0.00542496	0.0443033
BIOCARTA_CSK_PATHWAY	1.66524	0.008	0.0463107
DENDRITIC_CELL_CD123POS_BLOOD	1.66444	0	0.0117013
SREBP1A&2_UP_SCAP_INDEP	1.66367	0.002	0.0116837
BIOCARTA_TCR_PATHWAY	1.66148	0.00747664	0.047466
TAKEDA_TARGETS_OF_NUP98_HOXA9_FUSION_16D_UP	1.65874	0	0.0473639
EPPERT_HSC_R	1.65564	0	0.0486833
BIOCARTA_UCALPAIN_PATHWAY	1.65528	0.00974659	0.0510617
PID_GMCSF_PATHWAY	1.65501	0.00197239	0.0505551
REACTOME_POTASSIUM_CHANNELS	1.65486	0	0.050075
MAHAJAN_RESPONSE_TO_IL1A_DN	1.6548	0.00554529	0.0488161
REACTOME_CELL_SURFACE_INTERACTIONS_AT_THE_VASCULAR_WALL	1.65472	0	0.0495786
LEE_DOUBLE_POLAR_THYMOCYTE	1.65406	0.00795229	0.0488971
HOQUE_METHYLATED_IN_CANCER	1.65352	0.0037594	0.0488286
GARY_CD5_TARGETS_UP	1.65288	0	0.0488184
GC_B_CELL_BLHIGH_DLBCLLOW	1.65239	0.00560748	0.0128687
KEGG_FC_GAMMA_R_MEDIATED_PHAGOCYTOSIS	1.65205	0.00177305	0.0502846
HALMOS_CEBPA_TARGETS_DN	1.65136	0.00397614	0.0492498
YAO_TEMPORAL_RESPONSE_TO_PROGESTERONE_CLUSTER_1	1.6509	0.00193424	0.0492137
TCELL_CYTOKINE_INDUCED_PBMC_BCELL_NOCHANGE	1.6503	0.00381679	0.0129835
REACTOME_TOLL_RECEPTOR_CASCADES	1.64977	0	0.051221
LEE_AGING_CEREBELLUM_UP	1.64968	0	0.0495703
KAMIKUBO_MYELOID_CEBPA_NETWORK	1.6495	0.0142566	0.0493478
GRAHAM_CML_QUIESCENT_VS_NORMAL_QUIESCENT_DN	1.64946	0.00581395	0.0490871
NFKB_UP_BOTHOCILY3ANDLY10	1.64918	0.00613497	0.0129098
DAVICIONI_PAX_FOXO1_SIGNATURE_IN_ARMS_DN	1.64784	0.0077821	0.0496416
DACOSTA_UV_RESPONSE_VIA_ERCC3_COMMON_DN	1.64599	0	0.0502226
REACTOME_IL_2_SIGNALING	1.64546	0.00542496	0.0533795
HALLMARK_TGF_BETA_SIGNALING	1.6451	0	0.0110976
PID_IL12_STAT4_PATHWAY	1.64448	0.0171103	0.0532194
BROCKE_APOPTOSIS_REVERSED_BY_IL6	1.64349	0.00181488	0.0512497
BIOCARTA_FCER1_PATHWAY	1.64348	0.0156863	0.0532743
DIAZ_CHRONIC_MEYLOGENOUS_LEUKEMIA_DN	1.64326	0	0.0510772
ONDER_CDH1_TARGETS_2_DN	1.64024	0	0.0523875
REACTOME_CD28_CO_STIMULATION	1.63901	0.00816326	0.0551258
KEGG_FC_EPSILON_RI_SIGNALING_PATHWAY	1.6387	0	0.0546826
DAUER_STAT3_TARGETS_UP	1.63637	0.00790514	0.0544375
BLOOD_MODULE-3.4_UNDETERMINED	1.63604	0	0.0145866
REACTOME_TCR_SIGNALING	1.63537	0.0077821	0.0561457
BOYLAN_MULTIPLE_MYELOMA_D_DN	1.63515	0.00362976	0.0548986
TORCHIA_TARGETS_OF_EWSR1_FLI1_FUSION_TOP20_UP	1.63478	0.0152091	0.0548148
COLDREN_GEFITINIB_RESISTANCE_DN	1.63427	0	0.0548804
LEIN_ASTROCYTE_MARKERS	1.63375	0.00585938	0.0549137
REACTOME_P130CAS_LINKAGE_TO_MAPK_SIGNALING_FOR_INTEGRINS	1.63348	0.00804829	0.0566633
SARTIPY_NORMAL_AT_INSULIN_RESISTANCE_UP	1.63173	0.00397614	0.0558315
BIOCARTA_CTLA4_PATHWAY	1.63095	0.0123203	0.0577295
RAPAMYCIN_BJAB_UP	1.63072	0	0.015183
HALLMARK_KRAS_SIGNALING_DN	1.62929	0	0.0112615
DENDRITIC_CELL_BDCA1POS_BLOOD	1.62827	0.0116732	0.0152299
WENG_POR_TARGETS_GLOBAL_UP	1.62696	0.00760456	0.058363
SHEPARD_CRUSH_AND_BURN_MUTANT_DN	1.62686	0	0.058134
REACTOME_SIGNALING_BY_RHO_GTPASES	1.62669	0.00191571	0.0600395
MIKKELSEN_IPS_LCP_WITH_H3K4ME3	1.62648	0	0.0580783
RODRIGUES_DCC_TARGETS_DN	1.62622	0.00180505	0.0579418
PID_THROMBIN_PAR4_PATHWAY	1.62571	0.0211946	0.0600527
ST_MYOCYTE_AD_PATHWAY	1.62526	0.0110906	0.0597394
NFKB_UP_BCR_PAPER	1.62443	0.0019685	0.0156311
REACTOME_GENERATION_OF_SECOND_MESSENGER_MOLECULES	1.62426	0.0142276	0.0596774
ST_B_CELL_ANTIGEN_RECEPTOR	1.62405	0.00594059	0.0592351
PARK_TRETINOIN_RESPONSE_AND_PML_RARA_FUSION	1.62372	0.00943396	0.0592888
MASRI_RESISTANCE_TO_TAMOXIFEN_AND_AROMATASE_INHIBITORS_UP	1.62364	0.0136986	0.0590163
PID_CXCR3_PATHWAY	1.62343	0.00790514	0.0590445
BREDEMEYER_RAG_SIGNALING_VIA_ATM_NOT_VIA_NFKB_DN	1.62224	0.00570342	0.0595532
SMIRNOV_RESPONSE_TO_IR_2HR_DN	1.62141	0.0111111	0.0598302
DURAND_STROMA_NS_UP	1.62139	0	0.0595164
WILCOX_RESPONSE_TO_PROGESTERONE_UP	1.62122	0	0.0593277
BOSCO_ALLERGEN_INDUCED_TH2_ASSOCIATED_MODULE	1.62084	0	0.0592394
RAMALHO_STEMNESS_DN	1.62033	0	0.0592486
LINDSTEDT_DENDRITIC_CELL_MATURATION_B	1.62006	0.00582524	0.0591009
SREBP1A&2_UP_SCAP_DEP	1.61963	0.00764818	0.0161381
GESERICK_TERT_TARGETS_DN	1.61899	0.0178218	0.0594162
PID_INTEGRIN_A4B1_PATHWAY	1.61882	0.0117188	0.0613337
KLF2_INDUCED	1.61837	0.00381679	0.0161406
REACTOME_PD1_SIGNALING	1.61831	0.0200401	0.0610216
KEGG_REGULATION_OF_ACTIN_CYTOSKELETON	1.6183	0	0.0604676
HORTON_SREBF_TARGETS	1.61822	0.0176817	0.0595963
HALLMARK_BILE_ACID_METABOLISM	1.61738	0.00369686	0.0104645
BROWN_MYELOID_CELL_DEVELOPMENT_UP	1.61625	0	0.0605684
LI_INDUCED_T_TO_NATURAL_KILLER_DN	1.61611	0	0.0603577
YIH_RESPONSE_TO_ARSENITE_C1	1.61542	0.0181818	0.0604571
DAWSON_METHYLATED_IN_LYMPHOMA_TCL1	1.61528	0.0039604	0.0602434
TERAMOTO_OPN_TARGETS_CLUSTER_6	1.61421	0.0158416	0.0605346
GENTLES_LEUKEMIC_STEM_CELL_UP	1.61324	0.0114286	0.0607914
EPPERT_CE_HSC_LSC	1.61301	0.0159574	0.0606024
JISON_SICKLE_CELL_DISEASE_DN	1.61258	0	0.0605475
RICKMAN_TUMOR_DIFFERENTIATED_WELL_VS_MODERATELY_UP	1.61236	0.00183823	0.0603501
BIOCARTA_NO2IL12_PATHWAY	1.61119	0.0301811	0.0642086
HOWLIN_CITED1_TARGETS_1_UP	1.61094	0.0118812	0.0608502
PID_KIT_PATHWAY	1.61084	0.00567108	0.0638471
VALK_AML_CLUSTER_2	1.61081	0.0133333	0.0606471
KEGG_LYSOSOME	1.60907	0.0019305	0.0643599
GABRIELY_MIR21_TARGETS	1.60905	0	0.0614451
YAGI_AML_FAB_MARKERS	1.60823	0.0018018	0.0616209
ST_WNT_CA2_CYCLIC_GMP_PATHWAY	1.60716	0.00934579	0.0648207
BASAKI_YBX1_TARGETS_DN	1.60684	0	0.0620268
PID_ECADHERIN_KERATINOCYTE_PATHWAY	1.60628	0.0192678	0.0647573
CHARAFE_BREAST_CANCER_BASAL_VS_MESENCHYMAL_UP	1.60394	0.00556586	0.0634568
SA_B_CELL_RECEPTOR_COMPLEXES	1.60306	0.0223881	0.0661739
VALK_AML_WITH_FLT3_ITD	1.60286	0.0111111	0.0638355
MYELOMA_MS_SUBGROUP_UP	1.6025	0.00746269	0.0186683
KEGG_LEISHMANIA_INFECTION	1.6008	0.00391389	0.0670324
NAGASHIMA_NRG1_SIGNALING_UP	1.60012	0	0.0652161
TING_SILENCED_BY_DICER	1.60004	0.0212355	0.0649555
BIOCARTA_SHH_PATHWAY	1.59991	0.0174081	0.067021
REACTOME_GABA_B_RECEPTOR_ACTIVATION	1.59948	0.0294695	0.066675
DORSEY_GAB2_TARGETS	1.59898	0.0151515	0.0653709
DORSAM_HOXA9_TARGETS_DN	1.59705	0.0139165	0.0665188
KIM_HYPOXIA	1.59673	0.0230326	0.0663909
REACTOME_G_ALPHA_Z_SIGNALLING_EVENTS	1.59497	0.0164835	0.0690716
GRANDVAUX_IRF3_TARGETS_DN	1.59493	0.03	0.0674226
SMID_BREAST_CANCER_RELAPSE_IN_BONE_UP	1.59475	0.0018622	0.0672586
SENGUPTA_EBNA1_ANTICORRELATED	1.59422	0	0.0673201
PID_S1P_S1P1_PATHWAY	1.59374	0.00970874	0.0692605
MORI_PLASMA_CELL_DN	1.59328	0.019802	0.0676271
GARGALOVIC_RESPONSE_TO_OXIDIZED_PHOSPHOLIPIDS_TURQUOISE_UP	1.59319	0.00782779	0.0673918
NIELSEN_GIST_AND_SYNOVIAL_SARCOMA_UP	1.59306	0.0294118	0.0671479
CHEN_HOXA5_TARGETS_9HR_UP	1.59235	0	0.0672916
PID_IL12_2PATHWAY	1.59158	0.0060241	0.069934
TCELL_PIIND4X_FESKE_FIG4	1.59152	0.00534759	0.0206634
SCHURINGA_STAT5A_TARGETS_UP	1.59134	0.0211946	0.0676827
XU_RESPONSE_TO_TRETINOIN_UP	1.59116	0.028169	0.0674976
MYELOMA_CD-1_SUBGROUP_DOWN	1.59052	0.0111524	0.0206103
FERRANDO_TAL1_NEIGHBORS	1.58915	0.0195695	0.068622
ALTEMEIER_RESPONSE_TO_LPS_WITH_MECHANICAL_VENTILATION	1.58899	0.00186567	0.0684594
RAGHAVACHARI_PLATELET_SPECIFIC_GENES	1.58841	0.00909091	0.0685513
YANG_BREAST_CANCER_ESR1_DN	1.58771	0.0178218	0.0686608
ZHENG_FOXP3_TARGETS_IN_THYMUS_UP	1.58745	0	0.0685111
REACTOME_INTERFERON_ALPHA_BETA_SIGNALING	1.58695	0.00583658	0.0723557
HUNSBERGER_EXERCISE_REGULATED_GENES	1.58539	0.0188324	0.0694815
SHIN_B_CELL_LYMPHOMA_CLUSTER_3	1.58488	0.0252918	0.0695685
OKAMOTO_LIVER_CANCER_MULTICENTRIC_OCCURRENCE_UP	1.58482	0.0197239	0.0693468
CHEBOTAEV_GR_TARGETS_UP	1.58274	0.00184843	0.0705292
REACTOME_DEVELOPMENTAL_BIOLOGY	1.5818	0	0.0754083
PID_ENDOTHELIN_PATHWAY	1.58172	0.00571429	0.0748319
ST_GA12_PATHWAY	1.58107	0.0220994	0.0747059
BIOCARTA_CCR5_PATHWAY	1.58058	0.0324544	0.0744313
REACTOME_REGULATION_OF_WATER_BALANCE_BY_RENAL_AQUAPORINS	1.5801	0.0113208	0.0741909
COWLING_MYCN_TARGETS	1.57942	0.0196464	0.0726024
ELVIDGE_HYPOXIA_UP	1.57895	0	0.0725921
LEIN_NEURON_MARKERS	1.57867	0.00727273	0.0724643
MIKKELSEN_ES_LCP_WITH_H3K4ME3	1.57768	0	0.0729411
LI_INDUCED_T_TO_NATURAL_KILLER_UP	1.57684	0	0.0731383
HALLMARK_COMPLEMENT	1.57642	0	0.0140299
QI_HYPOXIA	1.57522	0.00180505	0.0740481
HOELZEL_NF1_TARGETS_DN	1.57378	0.00391389	0.0748301
BOYLAN_MULTIPLE_MYELOMA_C_D_DN	1.57347	0.00173913	0.0747486
LE_EGR2_TARGETS_DN	1.573	0.00535714	0.0748719
HIF1ALPHA_1.5X_UP	1.57298	0.00190114	0.0240505
BLOOD_MODULE-2.6_MYELOID_LINEAGE-2	1.57279	0.00178571	0.0237567
BERENJENO_ROCK_SIGNALING_NOT_VIA_RHOA_DN	1.57178	0.012844	0.0755318
KEGG_HEDGEHOG_SIGNALING_PATHWAY	1.57172	0.0150659	0.0794401
LIM_MAMMARY_STEM_CELL_UP	1.57117	0	0.0756653
SHEPARD_BMYB_MORPHOLINO_DN	1.57052	0	0.0758594
BIOCARTA_PTDINS_PATHWAY	1.57046	0.0222222	0.079695
AMIT_SERUM_RESPONSE_40_MCF10A	1.56998	0.0221811	0.0758871
WOTTON_RUNX_TARGETS_DN	1.56969	0.0176125	0.0757884
HADDAD_T_LYMPHOCYTE_AND_NK_PROGENITOR_UP	1.56907	0.008	0.0759462
SMID_BREAST_CANCER_RELAPSE_IN_BRAIN_UP	1.56885	0.0205993	0.0757514
SHEPARD_BMYB_TARGETS	1.56867	0.00375234	0.0755585
MORI_SMALL_PRE_BII_LYMPHOCYTE_UP	1.56739	0.00725953	0.0761835
KORKOLA_YOLK_SAC_TUMOR_UP	1.56652	0.0162602	0.0764188
DAZARD_RESPONSE_TO_UV_NHEK_DN	1.56628	0	0.0762252
GALINDO_IMMUNE_RESPONSE_TO_ENTEROTOXIN	1.5659	0.00596422	0.0761837
RIGGI_EWING_SARCOMA_PROGENITOR_UP	1.56476	0.00175131	0.0767664
RUIZ_TNC_TARGETS_UP	1.56457	0.00176056	0.0765868
PLASARI_TGFB1_TARGETS_10HR_DN	1.56454	0	0.0762967
ELVIDGE_HIF1A_AND_HIF2A_TARGETS_DN	1.56446	0.00575816	0.0760488
BIOCARTA_PTEN_PATHWAY	1.56421	0.0279851	0.0834775
PID_FOXO_PATHWAY	1.56365	0.0124777	0.0832673
KEGG_JAK_STAT_SIGNALING_PATHWAY	1.56311	0	0.0830356
WANG_RESPONSE_TO_BEXAROTENE_DN	1.56179	0.0189753	0.0778182
BIOCARTA_VIP_PATHWAY	1.56111	0.0296443	0.0838664
ZHAN_MULTIPLE_MYELOMA_MS_UP	1.56095	0.00201613	0.0781193
BIOCARTA_ALK_PATHWAY	1.56076	0.015444	0.0835009
BLOOD_MODULE-2.2_NEUTROPHILS	1.56066	0.0189394	0.0264327
BHAT_ESR1_TARGETS_VIA_AKT1_DN	1.56021	0.0110497	0.0784062
MONNIER_POSTRADIATION_TUMOR_ESCAPE_DN	1.56021	0	0.0781058
REACTOME_CYTOKINE_SIGNALING_IN_IMMUNE_SYSTEM	1.55961	0	0.0837097
CC_1P33_UP	1.5595	0	0.0263075
HEDENFALK_BREAST_CANCER_BRACX_DN	1.55765	0.020284	0.0795346
GU_PDEF_TARGETS_UP	1.5576	0.003861	0.0792671
SWEET_LUNG_CANCER_KRAS_DN	1.55462	0	0.0812206
DAZARD_UV_RESPONSE_CLUSTER_G6	1.55421	0.00179211	0.0811564
SCHAEFFER_PROSTATE_DEVELOPMENT_48HR_DN	1.55277	0	0.081894
HORIUCHI_WTAP_TARGETS_UP	1.55236	0	0.0818886
HESS_TARGETS_OF_HOXA9_AND_MEIS1_DN	1.551	0.00974659	0.0826507
CONCANNON_APOPTOSIS_BY_EPOXOMICIN_DN	1.5502	0.00706714	0.0828563
HELLER_HDAC_TARGETS_UP	1.54936	0.00185529	0.0832091
FARMER_BREAST_CANCER_CLUSTER_4	1.5488	0.0348162	0.0833819
HALLMARK_INTERFERON_GAMMA_RESPONSE	1.54809	0	0.016946
FLECHNER_PBL_KIDNEY_TRANSPLANT_OK_VS_DONOR_DN	1.5479	0.0166052	0.0837302
HAHTOLA_CTCL_PATHOGENESIS	1.54531	0.0351562	0.0853896
NAKAMURA_ADIPOGENESIS_LATE_UP	1.54455	0.003663	0.0856559
ZHAN_MULTIPLE_MYELOMA_CD1_AND_CD2_UP	1.5445	0.0110906	0.0853864
BIOCARTA_NKCELLS_PATHWAY	1.54359	0.0305344	0.0957419
FERRANDO_T_ALL_WITH_MLL_ENL_FUSION_UP	1.54352	0.00749064	0.0858317
KHETCHOUMIAN_TRIM24_TARGETS_UP	1.54129	0.0232558	0.0872389
PID_HIF1_TFPATHWAY	1.5408	0.0184502	0.0973863
AZARE_NEOPLASTIC_TRANSFORMATION_BY_STAT3_UP	1.53921	0.00356506	0.0886159
REACTOME_ABCA_TRANSPORTERS_IN_LIPID_HOMEOSTASIS	1.53876	0.0371134	0.0985221
SAFFORD_T_LYMPHOCYTE_ANERGY	1.53848	0.00191571	0.0888758
BLALOCK_ALZHEIMERS_DISEASE_INCIPIENT_UP	1.53846	0	0.088587
MAHADEVAN_IMATINIB_RESISTANCE_UP	1.53778	0.0302419	0.0888311
TAKEDA_TARGETS_OF_NUP98_HOXA9_FUSION_8D_DN	1.53776	0	0.0885202
REACTOME_SEMAPHORIN_INTERACTIONS	1.53756	0.0116959	0.0987316
VERHAAK_AML_WITH_NPM1_MUTATED_UP	1.53662	0.00350877	0.0891569
BIOCARTA_CXCR4_PATHWAY	1.53603	0.0316832	0.0994368
HRAS_OVEREXPRESSION_2X_DOWN	1.53545	0.011215	0.0324575
MURAKAMI_UV_RESPONSE_24HR	1.53529	0.0341365	0.0900156
PHONG_TNF_RESPONSE_VIA_P38_PARTIAL	1.53514	0.00191939	0.0898043
SMITH_TERT_TARGETS_DN	1.53451	0.00927644	0.0899359
PAX5_REPRESSED	1.53396	0.0189036	0.032448
OSWALD_HEMATOPOIETIC_STEM_CELL_IN_COLLAGEN_GEL_UP	1.53384	0	0.0900829
CHUNG_BLISTER_CYTOTOXICITY_UP	1.53138	0.005291	0.0917225
HERNANDEZ_ABERRANT_MITOSIS_BY_DOCETACEL_2NM_DN	1.53064	0.0253906	0.0919183
AMIT_EGF_RESPONSE_40_MCF10A	1.53029	0.043222	0.0919144
TAKEDA_TARGETS_OF_NUP98_HOXA9_FUSION_10D_UP	1.53005	0	0.091753
BILBAN_B_CLL_LPL_DN	1.52951	0.0264151	0.0918107
MIKKELSEN_IPS_ICP_WITH_H3K27ME3	1.52947	0.011811	0.0915562
COULOUARN_TEMPORAL_TGFB1_SIGNATURE_DN	1.5269	0.00723327	0.0935659
DIRMEIER_LMP1_RESPONSE_LATE_UP	1.52646	0.0156863	0.0935706
ABE_VEGFA_TARGETS_30MIN	1.52623	0.0213592	0.0934141
ROZANOV_MMP14_TARGETS_UP	1.52597	0	0.093281
BAKKER_FOXO3_TARGETS_UP	1.52544	0.0108893	0.0934234
THUM_SYSTOLIC_HEART_FAILURE_UP	1.52419	0	0.0940612
GAUSSMANN_MLL_AF4_FUSION_TARGETS_G_UP	1.52376	0.00178253	0.0940658
DUTERTRE_ESTRADIOL_RESPONSE_24HR_DN	1.52151	0	0.0954403
KASLER_HDAC7_TARGETS_1_DN	1.52148	0.0393258	0.0951625
DELYS_THYROID_CANCER_DN	1.52027	0.00176056	0.0958575
EPPERT_LSC_R	1.51938	0.0301205	0.0962083
TCELL_PIIND4X_FESKE_FIG6	1.51915	0.00537634	0.0363094
DENDRITIC_CELL_CD16POS_BLOOD	1.51867	0.0196464	0.0359659
RORIE_TARGETS_OF_EWSR1_FLI1_FUSION_DN	1.51849	0.0441459	0.0965854
KONDO_PROSTATE_CANCER_WITH_H3K27ME3	1.51774	0	0.0968965
VERHAAK_GLIOBLASTOMA_PRONEURAL	1.51772	0	0.0966033
MCLACHLAN_DENTAL_CARIES_DN	1.51726	0.00559702	0.0967906
AMUNDSON_GENOTOXIC_SIGNATURE	1.51653	0.00576923	0.0970645
PENG_GLUTAMINE_DEPRIVATION_UP	1.51561	0.0209524	0.0975089
FARMER_BREAST_CANCER_CLUSTER_7	1.51517	0.0490196	0.0975166
LABBE_TGFB1_TARGETS_UP	1.51475	0.00787402	0.0975834
LIU_IL13_PRIMING_MODEL	1.51263	0.0444015	0.0989623
SCHLINGEMANN_SKIN_CARCINOGENESIS_TPA_DN	1.51144	0.0337302	0.0996705
PLASARI_TGFB1_TARGETS_1HR_UP	1.51138	0.0297619	0.0993868
KANG_GIST_WITH_PDGFRA_UP	1.51136	0.0214425	0.0991086
VERHAAK_GLIOBLASTOMA_MESENCHYMAL	1.51128	0	0.0988721
ROSS_AML_WITH_CBFB_MYH11_FUSION	1.50963	0.0226843	0.0999842
KOYAMA_SEMA3B_TARGETS_UP	1.50961	0	0.0996781
PEREZ_TP53_AND_TP63_TARGETS	1.50897	0.0017762	0.0999088
CNS_NODE1661	1.50861	0.0094518	0.0384847
LEE_TARGETS_OF_PTCH1_AND_SUFU_DN	1.5085	0.00938086	0.0999984
THYMIC_SP_CD4+TCELL_GT_BLOOD_CD4+TCELL	1.49899	0.0127971	0.0414925
BLOOD_CD4+TCELL_GT_THYMIC_SP_CD4+TCELL	1.49893	0.0191205	0.0410541
HALLMARK_HYPOXIA	1.49299	0.00571429	0.0272309
BLOOD_MODULE-1.2_PLATELETS	1.48092	0.0124777	0.0471325
BLOOD_MODULE-2.1_CYTOTOXIC_CELLS	1.47494	0.00736648	0.0489721
E2F3_OVEREXPRESSION_4X_UP	1.47411	0.0248566	0.0487707
HALLMARK_IL2_STAT5_SIGNALING	1.46807	0.00740741	0.0316467
HALLMARK_APICAL_JUNCTION	1.46298	0.00530974	0.0305957
HRAS_OVEREXPRESSION_4X_UP	1.44991	0.00934579	0.0582743
BLOOD_MODULE-1.4_UNDETERMINED	1.43436	0.00931099	0.0648371
BLOOD_MODULE-1.5_MYELOID_LINEAGE-1	1.42492	0.0223048	0.0689114
HALLMARK_IL6_JAK_STAT3_SIGNALING	1.42091	0.0208729	0.0426855
MYELOMA_MF_SUBGROUP_DOWN	1.41122	0.0516252	0.0754653
CNS_PNS_NODE1663	1.39868	0.00343643	0.082091
HALLMARK_MITOTIC_SPINDLE	1.39153	0.0157068	0.0510214
PMBL_9P24_GT_GCB	1.39125	0	0.0858052
KLF2_REPRESSED	1.38697	0.0223368	0.0872419
MYD88_NFKB_HBL1	1.38529	0.0350553	0.0874374
TCELL_CYTOKINE_INDUCED_IL2_IL7_IL15ONLY	1.38163	0.0925197	0.0886455
BLOOD_MODULE-3.2_INFLAMMATION-1	1.38055	0.00540541	0.0881555
JAK2_DOWNREGULATED_PMBL	1.37901	0.0016835	0.0881947
GLUCOSE_STARVE_DOWN	1.36912	0.0142096	0.0930655
HALLMARK_UV_RESPONSE_DN	1.36296	0.0182815	0.0607218
HALLMARK_APOPTOSIS	1.35792	0.0310881	0.0597582
HALLMARK_APICAL_SURFACE	1.34354	0.0825336	0.0649691
HALLMARK_COAGULATION	1.34261	0.02693	0.0620741
HALLMARK_PI3K_AKT_MTOR_SIGNALING	1.29879	0.0528302	0.0868111
Table S3B
NAME	NES	NOM p-val	FDR q-val
WELCSH_BRCA1_TARGETS_DN	-2.48676	0	0
MANALO_HYPOXIA_DN	-2.48371	0	0
PENG_RAPAMYCIN_RESPONSE_DN	-2.4168	0	0
SCHUHMACHER_MYC_TARGETS_UP	-2.34592	0	0
HIF1ALPHA_1.5X_DOWN	-2.33196	0	0
RAPAMYCIN_BJAB_DOWN	-2.32007	0	0
MYC_CHIP_PET_EXPR_UP	-2.28142	0	0
HALLMARK_MYC_TARGETS_V1	-2.27396	0	0
MYC_OVEREXPRESSION_1.5X_UP	-2.25618	0	0
HALLMARK_MYC_TARGETS_V2	-2.25577	0	0
SCHLOSSER_MYC_TARGETS_AND_SERUM_RESPONSE_DN	-2.25322	0	0
SCHLOSSER_MYC_AND_SERUM_RESPONSE_SYNERGY	-2.21294	0	0
HALLMARK_UNFOLDED_PROTEIN_RESPONSE	-2.21148	0	0
PENG_LEUCINE_DEPRIVATION_DN	-2.20914	0	0
REACTOME_ER_PHAGOSOME_PATHWAY	-2.19591	0	0
WONG_MITOCHONDRIA_GENE_MODULE	-2.19005	0	0
PENG_GLUTAMINE_DEPRIVATION_DN	-2.1896	0	0
SCHLOSSER_MYC_TARGETS_REPRESSED_BY_SERUM	-2.18875	0	0
LI_DCP2_BOUND_MRNA	-2.1809	0	0
SCHLOSSER_MYC_TARGETS_AND_SERUM_RESPONSE_UP	-2.17267	0	0
ELVIDGE_HYPOXIA_DN	-2.17055	0	0
PELLICCIOTTA_HDAC_IN_ANTIGEN_PRESENTATION_UP	-2.16279	0	0
GLUTAMINE_STARVE_DOWN	-2.16259	0	0
NOTCH_T-ALL_UP_PALOMERO	-2.15707	0	0
KEGG_PROTEASOME	-2.15637	0	0
ACOSTA_PROLIFERATION_INDEPENDENT_MYC_TARGETS_UP	-2.15382	0	0
KEGG_AMINOACYL_TRNA_BIOSYNTHESIS	-2.15305	0	0
REACTOME_MITOCHONDRIAL_PROTEIN_IMPORT	-2.14416	0	0
REACTOME_SCF_BETA_TRCP_MEDIATED_DEGRADATION_OF_EMI1	-2.13471	0	0
REACTOME_RNA_POL_I_PROMOTER_OPENING	-2.12384	0	0
REACTOME_PACKAGING_OF_TELOMERE_ENDS	-2.12082	0	0
ELVIDGE_HIF1A_AND_HIF2A_TARGETS_UP	-2.10624	0	0.000104
REACTOME_TELOMERE_MAINTENANCE	-2.09863	0	0
YAO_TEMPORAL_RESPONSE_TO_PROGESTERONE_CLUSTER_17	-2.09833	0	9.76e-05
LEUCINE_STARVE_DOWN	-2.0938	0	0
REACTOME_AUTODEGRADATION_OF_CDH1_BY_CDH1_APC_C	-2.08493	0	0
REACTOME_TRNA_AMINOACYLATION	-2.08452	0	0
TARTE_PLASMA_CELL_VS_B_LYMPHOCYTE_UP	-2.08272	0	0.000137
REACTOME_CROSS_PRESENTATION_OF_SOLUBLE_EXOGENOUS_ANTIGENS_ENDOSOMES	-2.07988	0	0
REACTOME_UNFOLDED_PROTEIN_RESPONSE	-2.07839	0	0
REACTOME_REGULATION_OF_ORNITHINE_DECARBOXYLASE_ODC	-2.07815	0	0
REACTOME_TRANSLATION	-2.0618	0	6.19e-05
REACTOME_DIABETES_PATHWAYS	-2.05059	0	5.78e-05
ZHANG_RESPONSE_TO_CANTHARIDIN_DN	-2.04941	0	0.000174
CUI_GLUCOSE_DEPRIVATION	-2.04181	0	0.000331
REACTOME_CDT1_ASSOCIATION_WITH_THE_CDC6_ORC_ORIGIN_COMPLEX	-2.04152	0	0.000107
REACTOME_RESPIRATORY_ELECTRON_TRANSPORT_ATP_SYNTHESIS_BY_CHEMIOSMOTIC_COUPLING_AND_HEAT_PRODUCTION_BY_UNCOUPLING_PROTEINS_	-2.03446	0	0.000101
MOOTHA_HUMAN_MITODB_6_2002	-2.03398	0	0.000315
REACTOME_ASSEMBLY_OF_THE_PRE_REPLICATIVE_COMPLEX	-2.03305	0	9.5e-05
REACTOME_METABOLISM_OF_PROTEINS	-2.03204	0	0.000134
REACTOME_APC_C_CDC20_MEDIATED_DEGRADATION_OF_MITOTIC_PROTEINS	-2.02112	0	0.000127
GARCIA_TARGETS_OF_FLI1_AND_DAX1_DN	-2.02067	0	0.000337
REACTOME_SCFSKP2_MEDIATED_DEGRADATION_OF_P27_P21	-2.01909	0	0.000121
MOOTHA_MITOCHONDRIA	-2.01136	0	0.00036
REACTOME_RNA_POL_I_RNA_POL_III_AND_MITOCHONDRIAL_TRANSCRIPTION	-2.00307	0	0.000153
BIOCARTA_PROTEASOME_PATHWAY	-2.00258	0	0.000146
REACTOME_SRP_DEPENDENT_COTRANSLATIONAL_PROTEIN_TARGETING_TO_MEMBRANE	-2.0013	0	0.00014
DANG_MYC_TARGETS_UP	-2.00043	0	0.000449
REACTOME_DESTABILIZATION_OF_MRNA_BY_AUF1_HNRNP_D0	-2.00037	0	0.00017
XBP1_TARGET_SECRETORY	-1.99801	0	0.000162
BLOOD_MODULE-3.7_UNDETERMINED	-1.99396	0	0.000144
KARLSSON_TGFB1_TARGETS_UP	-1.99384	0	0.000463
ELVIDGE_HIF1A_TARGETS_UP	-1.9924	0	0.000446
YAO_TEMPORAL_RESPONSE_TO_PROGESTERONE_CLUSTER_14	-1.99148	0	0.00049
REACTOME_SIGNALING_BY_WNT	-1.98703	0	0.000258
PLASMA_CELL_GT_B_CELL	-1.98213	0	0.000192
BURTON_ADIPOGENESIS_5	-1.98073	0	0.00065
REACTOME_RESPIRATORY_ELECTRON_TRANSPORT	-1.97443	0	0.000375
REACTOME_DEPOSITION_OF_NEW_CENPA_CONTAINING_NUCLEOSOMES_AT_THE_CENTROMERE	-1.97244	0	0.000362
REACTOME_CDK_MEDIATED_PHOSPHORYLATION_AND_REMOVAL_OF_CDC6	-1.97094	0	0.000379
REACTOME_APC_C_CDH1_MEDIATED_DEGRADATION_OF_CDC20_AND_OTHER_APC_C_CDH1_TARGETED_PROTEINS_IN_LATE_MITOSIS_EARLY_G1	-1.96971	0	0.000394
LOCKWOOD_AMPLIFIED_IN_LUNG_CANCER	-1.96602	0	0.000883
REACTOME_TRANSCRIPTION	-1.96294	0	0.000437
YAO_TEMPORAL_RESPONSE_TO_PROGESTERONE_CLUSTER_11	-1.96026	0	0.00107716
PELLICCIOTTA_HDAC_IN_ANTIGEN_PRESENTATION_DN	-1.95766	0	0.00112196
YAO_TEMPORAL_RESPONSE_TO_PROGESTERONE_CLUSTER_10	-1.9569	0	0.00111268
MARCHINI_TRABECTEDIN_RESISTANCE_DN	-1.95628	0	0.00110384
BLUM_RESPONSE_TO_SALIRASIB_UP	-1.94958	0	0.00136446
TAKAO_RESPONSE_TO_UVB_RADIATION_UP	-1.94562	0	0.00151804
SANA_RESPONSE_TO_IFNG_DN	-1.94464	0	0.0015446
REACTOME_P53_INDEPENDENT_G1_S_DNA_DAMAGE_CHECKPOINT	-1.94348	0	0.000743
LOPEZ_MBD_TARGETS_IMPRINTED_AND_X_LINKED	-1.9318	0	0.00195067
HALLMARK_OXIDATIVE_PHOSPHORYLATION	-1.92954	0	0
PACHER_TARGETS_OF_IGF1_AND_IGF2_UP	-1.92824	0	0.00205088
REACTOME_M_G1_TRANSITION	-1.92689	0	0.00107897
CAMPS_COLON_CANCER_COPY_NUMBER_UP	-1.92397	0	0.00208515
REACTOME_RNA_POL_III_CHAIN_ELONGATION	-1.92359	0	0.00122339
REACTOME_TCA_CYCLE_AND_RESPIRATORY_ELECTRON_TRANSPORT	-1.9218	0	0.0012129
REACTOME_RNA_POL_III_TRANSCRIPTION_INITIATION_FROM_TYPE_2_PROMOTER	-1.91481	0	0.00141797
REACTOME_METABOLISM_OF_AMINO_ACIDS_AND_DERIVATIVES	-1.90783	0	0.00158838
IRITANI_MAD1_TARGETS_DN	-1.90765	0	0.00259494
REACTOME_CYTOSOLIC_TRNA_AMINOACYLATION	-1.90482	0.00203252	0.00154658
REACTOME_CYCLIN_E_ASSOCIATED_EVENTS_DURING_G1_S_TRANSITION_	-1.90452	0	0.00152837
YAO_TEMPORAL_RESPONSE_TO_PROGESTERONE_CLUSTER_13	-1.9034	0	0.00279539
REACTOME_S_PHASE	-1.88977	0	0.00204125
CHAUHAN_RESPONSE_TO_METHOXYESTRADIOL_UP	-1.88167	0	0.00407426
REACTOME_AMYLOIDS	-1.88094	0	0.00234042
REACTOME_AUTODEGRADATION_OF_THE_E3_UBIQUITIN_LIGASE_COP1	-1.87992	0	0.00230462
LI_AMPLIFIED_IN_LUNG_CANCER	-1.87832	0	0.00419233
REACTOME_ANTIGEN_PRESENTATION_FOLDING_ASSEMBLY_AND_PEPTIDE_LOADING_OF_CLASS_I_MHC	-1.87736	0	0.00235122
TIEN_INTESTINE_PROBIOTICS_24HR_DN	-1.87453	0	0.00434099
REACTOME_SYNTHESIS_OF_DNA	-1.85915	0	0.00307083
REACTOME_RNA_POL_I_TRANSCRIPTION	-1.85324	0	0.00336744
REACTOME_ORC1_REMOVAL_FROM_CHROMATIN	-1.85288	0	0.0033133
REACTOME_REGULATION_OF_MITOTIC_CELL_CYCLE	-1.84338	0	0.00387333
NAKAMURA_CANCER_MICROENVIRONMENT_DN	-1.84266	0.0040568	0.0075103
REACTOME_RNA_POL_III_TRANSCRIPTION_INITIATION_FROM_TYPE_3_PROMOTER	-1.83904	0	0.00407499
XU_RESPONSE_TO_TRETINOIN_AND_NSC682994_DN	-1.83374	0	0.00859437
WALLACE_PROSTATE_CANCER_UP	-1.83281	0	0.00850131
PGC-1ALPHA_OVEREPXRESSION_UP	-1.83153	0	0.00207507
MYELOMA_CD-2_SUBGROUP_DOWN	-1.82731	0	0.00205728
SMITH_TERT_TARGETS_UP	-1.82675	0	0.00927662
REACTOME_MRNA_SPLICING_MINOR_PATHWAY	-1.82171	0	0.00547442
REACTOME_MEIOTIC_RECOMBINATION	-1.82074	0	0.00545016
REACTOME_G1_S_TRANSITION	-1.82071	0	0.0053433
GROSS_HYPOXIA_VIA_HIF1A_UP	-1.82037	0.00211416	0.0100861
REACTOME_POST_TRANSLATIONAL_MODIFICATION_SYNTHESIS_OF_GPI_ANCHORED_PROTEINS	-1.82035	0.00208768	0.00525711
WONG_EMBRYONIC_STEM_CELL_CORE	-1.81976	0	0.0100186
CHOW_RASSF1_TARGETS_DN	-1.81875	0	0.00995242
XBP1_TARGET_ALL	-1.808	0	0.00275054
REACTOME_MEIOTIC_SYNAPSIS	-1.80711	0	0.00652284
NATSUME_RESPONSE_TO_INTERFERON_BETA_DN	-1.80508	0.00193798	0.0122718
RHODES_CANCER_META_SIGNATURE	-1.80435	0	0.0121504
MULLIGAN_NTF3_SIGNALING_VIA_INSR_AND_IGF1R_UP	-1.80252	0	0.0122351
IVANOVA_HEMATOPOIESIS_EARLY_PROGENITOR	-1.80061	0	0.0123739
STARK_PREFRONTAL_CORTEX_22Q11_DELETION_DN	-1.79909	0	0.0124056
REACTOME_AMINO_ACID_SYNTHESIS_AND_INTERCONVERSION_TRANSAMINATION	-1.79547	0.00204918	0.00775429
LIN_MELANOMA_COPY_NUMBER_UP	-1.79436	0	0.013006
IVANOVA_HEMATOPOIESIS_INTERMEDIATE_PROGENITOR	-1.7922	0	0.0133259
KEGG_RNA_POLYMERASE	-1.79135	0.00206186	0.00800117
REACTOME_REGULATION_OF_APOPTOSIS	-1.78905	0	0.00817761
KEGG_PROTEIN_EXPORT	-1.78844	0.00189036	0.00807882
REACTOME_CHROMOSOME_MAINTENANCE	-1.78705	0	0.00811543
KIM_MYC_AMPLIFICATION_TARGETS_UP	-1.78679	0	0.0139864
WOOD_EBV_EBNA1_TARGETS_UP	-1.78281	0	0.0146281
HOFMANN_MYELODYSPLASTIC_SYNDROM_LOW_RISK_DN	-1.78079	0.0039604	0.0147978
REACTOME_VIF_MEDIATED_DEGRADATION_OF_APOBEC3G	-1.78009	0	0.00877314
ZHAN_MULTIPLE_MYELOMA_CD2_DN	-1.7795	0.0021322	0.0148391
NAKAMURA_TUMOR_ZONE_PERIPHERAL_VS_CENTRAL_UP	-1.77732	0	0.0150905
KEGG_SYSTEMIC_LUPUS_ERYTHEMATOSUS	-1.77607	0	0.00917202
AIYAR_COBRA1_TARGETS_UP	-1.77301	0	0.0157629
BHAT_ESR1_TARGETS_VIA_AKT1_UP	-1.77277	0	0.0155593
MUELLER_PLURINET	-1.77271	0	0.0153487
OUYANG_PROSTATE_CANCER_MARKERS	-1.77229	0	0.0152434
REACTOME_ACTIVATION_OF_CHAPERONE_GENES_BY_XBP1S	-1.77155	0	0.00964842
MENSSEN_MYC_TARGETS	-1.77047	0	0.0154222
PENG_GLUCOSE_DEPRIVATION_UP	-1.77039	0	0.0152106
HIF1ALPHA_2X_DOWN	-1.76854	0	0.00478745
MONNIER_POSTRADIATION_TUMOR_ESCAPE_UP	-1.7656	0	0.0160765
UDAYAKUMAR_MED1_TARGETS_UP	-1.76488	0	0.0159891
MACLACHLAN_BRCA1_TARGETS_UP	-1.76392	0	0.0160899
ELVIDGE_HYPOXIA_BY_DMOG_DN	-1.7603	0	0.0167218
REACTOME_P53_DEPENDENT_G1_DNA_DAMAGE_RESPONSE	-1.75739	0	0.0118764
REACTOME_PERK_REGULATED_GENE_EXPRESSION	-1.75739	0.00426439	0.0116879
MYC_RNAI_OCILY3	-1.75547	0.00209205	0.0050474
REACTOME_RNA_POL_III_TRANSCRIPTION	-1.75544	0	0.0117848
NIKOLSKY_BREAST_CANCER_11Q12_Q14_AMPLICON	-1.75347	0	0.0180778
KEGG_PARKINSONS_DISEASE	-1.74663	0.00224215	0.0128916
DUTERTRE_ESTRADIOL_RESPONSE_6HR_UP	-1.74466	0	0.0200258
DAIRKEE_CANCER_PRONE_RESPONSE_BPA	-1.74306	0	0.0201571
GRADE_COLON_AND_RECTAL_CANCER_UP	-1.73915	0	0.0210841
HOFMANN_MYELODYSPLASTIC_SYNDROM_RISK_UP	-1.7388	0.00610998	0.0209203
REACTOME_ASPARAGINE_N_LINKED_GLYCOSYLATION	-1.73305	0.00453515	0.0152716
TCELL_CYTOKINE_INDUCED_PROLIF	-1.72938	0	0.00731691
REACTOME_METABOLISM_OF_RNA	-1.72908	0	0.0159479
BOYAULT_LIVER_CANCER_SUBCLASS_G3_UP	-1.72867	0	0.0234313
HOLLMANN_APOPTOSIS_VIA_CD40_DN	-1.72731	0	0.0236069
BASSO_B_LYMPHOCYTE_NETWORK	-1.72694	0.00219298	0.0234084
REACTOME_BIOSYNTHESIS_OF_THE_N_GLYCAN_PRECURSOR_DOLICHOL_LIPID_LINKED_OLIGOSACCHARIDE_LLO_AND_TRANSFER_TO_A_NASCENT_PROTEIN	-1.72686	0.00419287	0.0163867
MYELOMA_TACI_LOW_PLASMABLAST_GENE	-1.7251	0	0.00726717
OXFORD_RALA_OR_RALB_TARGETS_UP	-1.71879	0	0.0260496
GUENTHER_GROWTH_SPHERICAL_VS_ADHERENT_DN	-1.71564	0.004158	0.0269241
DAZARD_UV_RESPONSE_CLUSTER_G2	-1.71559	0.00224215	0.0266232
REACTOME_ANTIGEN_PROCESSING_CROSS_PRESENTATION	-1.7155	0	0.0187105
DAZARD_UV_RESPONSE_CLUSTER_G28	-1.71449	0.0100806	0.0266517
SANSOM_APC_TARGETS_REQUIRE_MYC	-1.71165	0	0.0272388
KRIGE_AMINO_ACID_DEPRIVATION	-1.71076	0.00421941	0.0271655
REACTOME_MITOTIC_G1_G1_S_PHASES	-1.71007	0.00229885	0.0198051
PROLIFERATION_NODE1606	-1.71	0.00203252	0.00852162
LI_CISPLATIN_RESISTANCE_DN	-1.70991	0.00207039	0.0272165
MOOTHA_PGC	-1.7095	0	0.02708
MYC_OVEREXPRESSION_2X_UP	-1.70902	0.00215054	0.00814411
REACTOME_INFLUENZA_VIRAL_RNA_TRANSCRIPTION_AND_REPLICATION	-1.70811	0	0.0200435
MOREAUX_B_LYMPHOCYTE_MATURATION_BY_TACI_DN	-1.70277	0	0.0290814
REACTOME_POST_TRANSLATIONAL_PROTEIN_MODIFICATION	-1.69935	0	0.0221336
GHO_ATF5_TARGETS_DN	-1.69802	0.00793651	0.0303876
SESTO_RESPONSE_TO_UV_C3	-1.69801	0.0108696	0.0300665
LEE_CALORIE_RESTRICTION_MUSCLE_UP	-1.69291	0.00194553	0.0316643
REACTOME_INFLUENZA_LIFE_CYCLE	-1.68999	0	0.024593
KEGG_PYRIMIDINE_METABOLISM	-1.68688	0	0.0250193
SCHUETZ_BREAST_CANCER_DUCTAL_INVASIVE_DN	-1.68614	0.00215517	0.0341627
GARY_CD5_TARGETS_DN	-1.68369	0	0.0348993
REACTOME_3_UTR_MEDIATED_TRANSLATIONAL_REGULATION	-1.68274	0	0.025925
GAJATE_RESPONSE_TO_TRABECTEDIN_DN	-1.67918	0.004158	0.036242
GLUTAMINE_GLUCOSE_STARVE_BOTH_DOWN	-1.6757	0	0.0118943
REACTOME_ACTIVATION_OF_THE_MRNA_UPON_BINDING_OF_THE_CAP_BINDING_COMPLEX_AND_EIFS_AND_SUBSEQUENT_BINDING_TO_43S	-1.67396	0	0.0286434
HELLER_SILENCED_BY_METHYLATION_DN	-1.67336	0	0.0383269
WIERENGA_PML_INTERACTOME	-1.67252	0.00212766	0.038369
MEINHOLD_OVARIAN_CANCER_LOW_GRADE_UP	-1.66735	0.0146444	0.0403113
KEGG_GLYCOSYLPHOSPHATIDYLINOSITOL_GPI_ANCHOR_BIOSYNTHESIS	-1.66662	0.00831601	0.0309145
DANG_REGULATED_BY_MYC_UP	-1.6664	0	0.0403314
SHAFFER_IRF4_TARGETS_IN_MYELOMA_VS_MATURE_B_LYMPHOCYTE	-1.66465	0.00208333	0.0407958
CHIANG_LIVER_CANCER_SUBCLASS_UNANNOTATED_DN	-1.65912	0	0.0431422
HALLMARK_DNA_REPAIR	-1.65831	0	0.00343785
REACTOME_ACTIVATION_OF_GENES_BY_ATF4	-1.65692	0.0117878	0.0341692
REACTOME_RNA_POL_III_TRANSCRIPTION_TERMINATION	-1.65527	0.00854701	0.0342981
REACTOME_REGULATION_OF_MRNA_STABILITY_BY_PROTEINS_THAT_BIND_AU_RICH_ELEMENTS	-1.65389	0.00439561	0.0343457
LU_EZH2_TARGETS_UP	-1.65265	0	0.0458287
REACTOME_MEIOSIS	-1.65065	0	0.0354264
GERHOLD_ADIPOGENESIS_DN	-1.65018	0.00200401	0.0466285
JAIN_NFKB_SIGNALING	-1.64861	0.00225734	0.0469222
BURTON_ADIPOGENESIS_2	-1.64827	0	0.0466745
WALLACE_JAK2_TARGETS_UP	-1.64239	0.0123711	0.0492947
MOOTHA_VOXPHOS	-1.64189	0	0.0491087
BIOCARTA_LONGEVITY_PATHWAY	-1.64049	0.00572519	0.0390518
REACTOME_MRNA_SPLICING	-1.63977	0	0.0388581
REACTOME_RNA_POL_II_PRE_TRANSCRIPTION_EVENTS	-1.63816	0.00635593	0.0390553
REACTOME_PROCESSING_OF_CAPPED_INTRON_CONTAINING_PRE_MRNA	-1.63755	0	0.0389083
REACTOME_METABOLISM_OF_MRNA	-1.63227	0	0.0407872
KEGG_SPLICEOSOME	-1.632	0	0.0404083
TARTE_PLASMA_CELL_VS_PLASMABLAST_DN	-1.63175	0	0.0542756
SHEPARD_CRUSH_AND_BURN_MUTANT_UP	-1.63098	0	0.0542432
MARKS_HDAC_TARGETS_DN	-1.62883	0.0163599	0.0550549
ZHAN_MULTIPLE_MYELOMA_UP	-1.62872	0.00403226	0.054623
REACTOME_CELL_CYCLE_CHECKPOINTS	-1.6268	0	0.0420865
REACTOME_METABOLISM_OF_NUCLEOTIDES	-1.62633	0.00431965	0.0418257
GRAHAM_CML_QUIESCENT_VS_CML_DIVIDING_UP	-1.62531	0.010101	0.0561534
HALLMARK_MTORC1_SIGNALING	-1.61965	0.00222222	0.00627188
LIN_APC_TARGETS	-1.61803	0	0.0605978
SHAFFER_IRF4_TARGETS_IN_PLASMA_CELL_VS_MATURE_B_LYMPHOCYTE	-1.61742	0.00424628	0.0604111
STEIN_ESRRA_TARGETS_UP	-1.6171	0	0.0601188
KEGG_ALZHEIMERS_DISEASE	-1.61705	0	0.0458718
CHEN_NEUROBLASTOMA_COPY_NUMBER_GAINS	-1.61583	0.00616016	0.0604781
REACTOME_AMINO_ACID_TRANSPORT_ACROSS_THE_PLASMA_MEMBRANE	-1.61537	0.0169133	0.0462705
MORI_PLASMA_CELL_UP	-1.61488	0.0107991	0.0605503
REACTOME_CELL_CYCLE	-1.61447	0	0.0462826
STEIN_ESRRA_TARGETS_RESPONSIVE_TO_ESTROGEN_UP	-1.61417	0.0122449	0.0604891
SESTO_RESPONSE_TO_UV_C7	-1.61238	0.00398406	0.0612174
HONMA_DOCETAXEL_RESISTANCE	-1.61164	0.0101833	0.0611162
BIOCARTA_EIF_PATHWAY	-1.61074	0.017094	0.0474321
REACTOME_MITOCHONDRIAL_TRNA_AMINOACYLATION	-1.61037	0.00431035	0.0470825
REACTOME_FORMATION_OF_RNA_POL_II_ELONGATION_COMPLEX_	-1.60754	0.0159046	0.048075
GLUCOSE_STARVE_UP	-1.60635	0.00411523	0.0244935
EPPERT_PROGENITOR	-1.60509	0.00214133	0.0648082
BILD_MYC_ONCOGENIC_SIGNATURE	-1.60442	0	0.0647478
REACTOME_SYNTHESIS_SECRETION_AND_DEACYLATION_OF_GHRELIN	-1.60411	0.0255319	0.0491664
REACTOME_CHONDROITIN_SULFATE_BIOSYNTHESIS	-1.60342	0.0140562	0.0489591
BURTON_ADIPOGENESIS_6	-1.60305	0	0.0650359
IRF4_TARGET_MM_PLASMA_CELL_GT_B_CELL	-1.60089	0.00220751	0.0245136
RHEIN_ALL_GLUCOCORTICOID_THERAPY_DN	-1.59884	0	0.0672733
FOURNIER_ACINAR_DEVELOPMENT_LATE_2	-1.59879	0	0.0667788
KEGG_PYRUVATE_METABOLISM	-1.59769	0.00817996	0.0511973
REACTOME_METABOLISM_OF_NON_CODING_RNA	-1.59342	0.0041841	0.0527726
KAAB_FAILED_HEART_VENTRICLE_DN	-1.59319	0.0122699	0.0700776
BCL6_CHIP-CHIP_3CELLTYPES_BCL6_MOTIF_CI	-1.59268	0	0.0256582
GALLUZZI_PREVENT_MITOCHONDIAL_PERMEABILIZATION	-1.59237	0.0208768	0.0700999
PROLIFERATION_NODE1542	-1.59218	0.0193133	0.0246921
AMIT_SERUM_RESPONSE_20_MCF10A	-1.58997	0.0198807	0.0711955
LIANG_SILENCED_BY_METHYLATION_2	-1.58916	0.00639659	0.0711125
GAVIN_FOXP3_TARGETS_CLUSTER_T4	-1.58838	0.00215517	0.0711151
KEGG_N_GLYCAN_BIOSYNTHESIS	-1.58723	0.00436681	0.0554958
KAYO_AGING_MUSCLE_DN	-1.58539	0.00225734	0.0724805
ROME_INSULIN_TARGETS_IN_MUSCLE_UP	-1.58384	0	0.0730516
ZHAN_MULTIPLE_MYELOMA_CD1_VS_CD2_UP	-1.58304	0.010917	0.0729788
HSIAO_HOUSEKEEPING_GENES	-1.58122	0	0.0738652
REACTOME_ELONGATION_ARREST_AND_RECOVERY	-1.57663	0.0145833	0.0610493
LIU_PROSTATE_CANCER_UP	-1.57526	0.00625	0.0780167
REACTOME_SYNTHESIS_OF_GLYCOSYLPHOSPHATIDYLINOSITOL_GPI	-1.57512	0.0218254	0.061295
REACTOME_PURINE_METABOLISM	-1.57446	0.0309278	0.0611064
BROWN_MYELOID_CELL_DEVELOPMENT_DN	-1.57364	0.00225225	0.0785458
DACOSTA_UV_RESPONSE_VIA_ERCC3_UP	-1.57307	0	0.0783449
REACTOME_RNA_POL_II_TRANSCRIPTION_PRE_INITIATION_AND_PROMOTER_OPENING	-1.57185	0.0125261	0.0620516
BARRIER_COLON_CANCER_RECURRENCE_UP	-1.57103	0.0208333	0.0793715
KIM_ALL_DISORDERS_DURATION_CORR_DN	-1.57066	0.00225225	0.0790895
KEGG_LYSINE_DEGRADATION	-1.57052	0.0128755	0.0622734
HESS_TARGETS_OF_HOXA9_AND_MEIS1_UP	-1.57016	0.00631579	0.0789164
RAMALHO_STEMNESS_UP	-1.56991	0	0.0785249
SERUM_RESPONSE_FB_UP	-1.56842	0	0.0299262
SINGH_NFE2L2_TARGETS	-1.56636	0.034188	0.0806846
KEGG_PURINE_METABOLISM	-1.56543	0	0.0646754
LASTOWSKA_NEUROBLASTOMA_COPY_NUMBER_UP	-1.56181	0	0.0837612
ACEVEDO_NORMAL_TISSUE_ADJACENT_TO_LIVER_TUMOR_DN	-1.56061	0	0.0842004
TOMLINS_PROSTATE_CANCER_UP	-1.5595	0.0149573	0.0844199
REACTOME_RNA_POL_II_TRANSCRIPTION	-1.55949	0.00441501	0.0674753
BENPORATH_MYC_TARGETS_WITH_EBOX	-1.55925	0	0.0840428
DAIRKEE_TERT_TARGETS_UP	-1.5588	0	0.0838002
REACTOME_CHONDROITIN_SULFATE_DERMATAN_SULFATE_METABOLISM	-1.55828	0.0234043	0.0677057
BORCZUK_MALIGNANT_MESOTHELIOMA_UP	-1.55822	0	0.0837235
MYD88_INTERFERON_HBL1	-1.55704	0.0159681	0.0317291
DASU_IL6_SIGNALING_UP	-1.55645	0.00607288	0.08457
REACTOME_FORMATION_OF_THE_HIV1_EARLY_ELONGATION_COMPLEX	-1.55473	0.0233051	0.0692338
NIKOLSKY_BREAST_CANCER_20Q12_Q13_AMPLICON	-1.55389	0	0.0859181
REACTOME_G1_S_SPECIFIC_TRANSCRIPTION	-1.55073	0.0401691	0.0709268
REACTOME_EXTENSION_OF_TELOMERES	-1.54894	0.018711	0.0713795
REACTOME_CLASS_I_MHC_MEDIATED_ANTIGEN_PROCESSING_PRESENTATION	-1.54833	0	0.0712124
MOOTHA_GLYCOGEN_METABOLISM	-1.54819	0.0425101	0.0901452
BIOCARTA_NO1_PATHWAY	-1.54465	0.0226337	0.072929
PID_IL1_PATHWAY	-1.54355	0.0157791	0.0729452
GARGALOVIC_RESPONSE_TO_OXIDIZED_PHOSPHOLIPIDS_BLUE_UP	-1.54184	0	0.0949392
PUIFFE_INVASION_INHIBITED_BY_ASCITES_UP	-1.5402	0.004329	0.0957592
WAMUNYOKOLI_OVARIAN_CANCER_LMP_UP	-1.53921	0	0.0961161
CHEMELLO_SOLEUS_VS_EDL_MYOFIBERS_DN	-1.53802	0.0392157	0.0964741
MARIADASON_RESPONSE_TO_CURCUMIN_SULINDAC_5	-1.53735	0.0342205	0.0963686
HAHTOLA_MYCOSIS_FUNGOIDES_UP	-1.53584	0.031746	0.0971706
LINDSTEDT_DENDRITIC_CELL_MATURATION_A	-1.53546	0.00444444	0.0968845
HALLMARK_REACTIVE_OXIGEN_SPECIES_PATHWAY	-1.53175	0.012605	0.0124885
KEGG_OXIDATIVE_PHOSPHORYLATION	-1.53145	0.00210526	0.08009
REACTOME_ACTIVATION_OF_NF_KAPPAB_IN_B_CELLS	-1.51907	0.0210526	0.0881768
KEGG_NOD_LIKE_RECEPTOR_SIGNALING_PATHWAY	-1.51232	0.0152174	0.0927846
DENDRITIC_CELL_CD123POS_TONSIL	-1.44568	0.0648855	0.0769636
PROLIFERATION_NODE1640	-1.44345	0.0274841	0.0755094
HALLMARK_ESTROGEN_RESPONSE_EARLY	-1.42547	0.00440529	0.0378999
THYMIC_PROGENITOR_TCELL_GT_THYMIC_DP_TCELL	-1.42422	0.0449898	0.084302
BLIMP_PROLIFERATION_REPRESSED	-1.42168	0.0215054	0.083166
BLOOD_MODULE-1.1_PLASMA_CELLS	-1.41877	0.067623	0.0825167
HALLMARK_ESTROGEN_RESPONSE_LATE	-1.39752	0.00650759	0.0445186
HALLMARK_GLYCOLYSIS	-1.37768	0.00462963	0.0492502
HALLMARK_UV_RESPONSE_UP	-1.37518	0.0194384	0.0463725
HALLMARK_ADIPOGENESIS	-1.34272	0.022779	0.0562564
HALLMARK_E2F_TARGETS	-1.30768	0.0250569	0.072613
HALLMARK_P53_PATHWAY	-1.27257	0.0389016	0.0911588
Table S3C
NAME	GENE_TITLE	SCORE
C13ORF15	chromosome 13 open reading frame 15	0.563977
CHI3L2	chitinase 3-like 2	0.520793
NCF1	neutrophil cytosolic factor 1, (chronic granulomatous disease, autosomal 1)	0.472626
NCF1C	neutrophil cytosolic factor 1C pseudogene	0.442261
NGFRAP1	nerve growth factor receptor (TNFRSF16) associated protein 1	0.425132
EVL	Enah/Vasp-like	0.402443
CAMP	cathelicidin antimicrobial peptide	0.386874
CD52	CD52 molecule	0.383705
CT45A4	null	0.372239
C21ORF7	chromosome 21 open reading frame 7	0.365304
TRIB2	tribbles homolog 2 (Drosophila)	0.357496
TLR10	toll-like receptor 10	0.351839
BEX2	brain expressed X-linked 2	0.351185
TCEAL4	transcription elongation factor A (SII)-like 4	0.347575
NAPSA	napsin A aspartic peptidase	0.339265
CT45A1	null	0.331534
XIST	X (inactive)-specific transcript	0.331217
FCRL3	Fc receptor-like 3	0.327456
LOC652616	null	0.318189
EGR1	early growth response 1	0.313205
SLC2A5	solute carrier family 2 (facilitated glucose/fructose transporter), member 5	0.301247
ARMCX2	armadillo repeat containing, X-linked 2	0.301219
ZSCAN18	null	0.30075
CT45A5	null	0.297383
TRO	trophinin	0.294864
PIB5PA	phosphatidylinositol (4,5) bisphosphate 5-phosphatase, A	0.291752
EGR2	early growth response 2 (Krox-20 homolog, Drosophila)	0.288914
DENND2D	DENN/MADD domain containing 2D	0.286928
HLA-A29.1	null	0.283035
HTR3A	5-hydroxytryptamine (serotonin) receptor 3A	0.282742
CD37	CD37 molecule	0.279746
GATM	glycine amidinotransferase (L-arginine:glycine amidinotransferase)	0.27779
FCER2	Fc fragment of IgE, low affinity II, receptor for (CD23)	0.277452
FAM129C	null	0.276274
ZNF439	zinc finger protein 439	0.275392
SLC15A3	solute carrier family 15, member 3	0.274319
GTSF1	null	0.271421
PTK2	PTK2 protein tyrosine kinase 2	0.269584
FGD2	FYVE, RhoGEF and PH domain containing 2	0.268169
ABCA6	ATP-binding cassette, sub-family A (ABC1), member 6	0.268061
DUSP5	dual specificity phosphatase 5	0.267514
NAPSB	napsin B aspartic peptidase pseudogene	0.264543
EBI2	Epstein-Barr virus induced gene 2 (lymphocyte-specific G protein-coupled receptor)	0.263704
LOC791120	null	0.263496
BNIP3	BCL2/adenovirus E1B 19kDa interacting protein 3	0.261784
TMSB15A	null	0.261263
LEPREL1	leprecan-like 1	0.260625
C6ORF223	null	0.258349
RFTN1	raftlin, lipid raft linker 1	0.257817
PTPN6	protein tyrosine phosphatase, non-receptor type 6	0.257475
ADAM19	ADAM metallopeptidase domain 19 (meltrin beta)	0.256728
CD72	CD72 molecule	0.255356
DHRS9	dehydrogenase/reductase (SDR family) member 9	0.248292
MT2A	metallothionein 2A	0.247018
MAP3K8	mitogen-activated protein kinase kinase kinase 8	0.246989
IFI30	interferon, gamma-inducible protein 30	0.246925
TSPAN13	tetraspanin 13	0.245169
CYB5A	cytochrome b5 type A (microsomal)	0.244991
EBI3	Epstein-Barr virus induced gene 3	0.244563
RUNDC2A	RUN domain containing 2A	0.244218
FLJ39632	-	0.242844
LOC728835	-	0.240847
PRICKLE1	prickle homolog 1 (Drosophila)	0.24066
CD24	CD24 molecule	0.240431
FGF9	fibroblast growth factor 9 (glia-activating factor)	0.240357
ITGB2	integrin, beta 2 (complement component 3 receptor 3 and 4 subunit)	0.239399
TCEAL3	transcription elongation factor A (SII)-like 3	0.238339
TMPRSS3	transmembrane protease, serine 3	0.238126
NUDT11	nudix (nucleoside diphosphate linked moiety X)-type motif 11	0.235914
SYK	spleen tyrosine kinase	0.233797
IRF8	interferon regulatory factor 8	0.233024
LOC651751	-	0.232622
H1F0	H1 histone family, member 0	0.232254
SYT11	synaptotagmin XI	0.230991
PARP15	poly (ADP-ribose) polymerase family, member 15	0.230964
SLC6A16	solute carrier family 6, member 16	0.230592
LGMN	legumain	0.228378
SIGLEC10	sialic acid binding Ig-like lectin 10	0.228271
RGPD2	RANBP2-like and GRIP domain containing 2	0.228132
C4ORF34	chromosome 4 open reading frame 34	0.227848
D4S234E	-	0.227674
MAPK10	mitogen-activated protein kinase 10	0.22761
NCF1B	neutrophil cytosolic factor 1B pseudogene	0.227371
MT1F	metallothionein 1F (functional)	0.225485
HCST	hematopoietic cell signal transducer	0.22548
CCL4L1	chemokine (C-C motif) ligand 4-like 1	0.225021
REL	v-rel reticuloendotheliosis viral oncogene homolog (avian)	0.223891
IRF5	interferon regulatory factor 5	0.223706
LOC647322	null	0.22361
CLDN23	claudin 23	0.22039
SLA	Src-like-adaptor	0.220233
PFN2	profilin 2	0.219824
GCNT1	glucosaminyl (N-acetyl) transferase 1, core 2 (beta-1,6-N-acetylglucosaminyltransferase)	0.219769
FCRL2	Fc receptor-like 2	0.219476
NFATC1	nuclear factor of activated T-cells, cytoplasmic, calcineurin-dependent 1	0.218866
TCEAL8	transcription elongation factor A (SII)-like 8	0.218492
PKIA	protein kinase (cAMP-dependent, catalytic) inhibitor alpha	0.215925
CCL4L2	chemokine (C-C motif) ligand 4-like 2	0.215722
CDK5R1	cyclin-dependent kinase 5, regulatory subunit 1 (p35)	0.215475
NLRP7	null	0.215206
CCND2	cyclin D2	0.214571
SENP7	SUMO1/sentrin specific peptidase 7	0.21371
C3ORF37	chromosome 3 open reading frame 37	0.213591
CARD11	caspase recruitment domain family, member 11	0.213127
RGPD1	RANBP2-like and GRIP domain containing 1	0.212286
EVI2B	ecotropic viral integration site 2B	0.212072
APP	amyloid beta (A4) precursor protein (peptidase nexin-II, Alzheimer disease)	0.211811
LOC646750	null	0.210297
SIRPA	signal-regulatory protein alpha	0.210202
SELL	selectin L (lymphocyte adhesion molecule 1)	0.209526
SLC2A3	solute carrier family 2 (facilitated glucose transporter), member 3	0.207993
GM2A	GM2 ganglioside activator	0.207792
HLA-DRB5	major histocompatibility complex, class II, DR beta 5	0.207561
PIK3AP1	phosphoinositide-3-kinase adaptor protein 1	0.206999
NELL2	NEL-like 2 (chicken)	0.206909
RBPMS2	RNA binding protein with multiple splicing 2	0.206276
SOX11	SRY (sex determining region Y)-box 11	0.206214
RALGPS2	Ral GEF with PH domain and SH3 binding motif 2	0.206193
XYLT1	xylosyltransferase I	0.206019
IL2RB	interleukin 2 receptor, beta	0.205614
PLS3	plastin 3 (T isoform)	0.205318
TRIM44	tripartite motif-containing 44	0.203893
C21ORF81	chromosome 21 open reading frame 81	0.203765
CD247	CD247 molecule	0.202563
SYT17	synaptotagmin XVII	0.20221
AIM2	absent in melanoma 2	0.201381
RALB	v-ral simian leukemia viral oncogene homolog B (ras related; GTP binding protein)	0.201009
GNG11	guanine nucleotide binding protein (G protein), gamma 11	0.200601
PTPLA	protein tyrosine phosphatase-like (proline instead of catalytic arginine), member A	0.199256
ITGB7	integrin, beta 7	0.197825
MGMT	O-6-methylguanine-DNA methyltransferase	0.197199
LPP	LIM domain containing preferred translocation partner in lipoma	0.197197
SNX8	sorting nexin 8	0.196951
ARPP-21	-	0.19642
METTL7A	methyltransferase like 7A	0.196383
BCL6	B-cell CLL/lymphoma 6 (zinc finger protein 51)	0.196339
MX1	myxovirus (influenza virus) resistance 1, interferon-inducible protein p78 (mouse)	0.196306
CD22	CD22 molecule	0.195406
GSPT2	G1 to S phase transition 2	0.194976
HOPX	null	0.194768
APOBEC3G	apolipoprotein B mRNA editing enzyme, catalytic polypeptide-like 3G	0.194371
ZNF573	zinc finger protein 573	0.194371
FKSG30	-	0.19398
HDGFRP3	-	0.192772
PIM1	pim-1 oncogene	0.192725
WBP5	WW domain binding protein 5	0.192549
PPP1R16B	protein phosphatase 1, regulatory (inhibitor) subunit 16B	0.192469
ZNF83	zinc finger protein 83	0.192008
DHX32	DEAH (Asp-Glu-Ala-His) box polypeptide 32	0.191739
HMOX1	heme oxygenase (decycling) 1	0.191662
RGS13	regulator of G-protein signalling 13	0.191331
LOC652175	null	0.190963
SPIB	Spi-B transcription factor (Spi-1/PU.1 related)	0.190649
SETBP1	SET binding protein 1	0.190269
C6ORF105	chromosome 6 open reading frame 105	0.190238
OAS1	2',5'-oligoadenylate synthetase 1, 40/46kDa	0.190034
BCAR3	breast cancer anti-estrogen resistance 3	0.189998
NCALD	neurocalcin delta	0.189892
ARID5B	AT rich interactive domain 5B (MRF1-like)	0.189616
CTSL2	cathepsin L2	0.189192
MYLIP	myosin regulatory light chain interacting protein	0.188962
FAM46A	family with sequence similarity 46, member A	0.188857
ZNF700	zinc finger protein 700	0.188469
PHACTR1	phosphatase and actin regulator 1	0.188427
COL5A1	collagen, type V, alpha 1	0.188279
RAB31	RAB31, member RAS oncogene family	0.188063
ATP1B1	ATPase, Na+/K+ transporting, beta 1 polypeptide	0.187965
CXADR	coxsackie virus and adenovirus receptor	0.187541
CD27	null	0.187276
AFF3	AF4/FMR2 family, member 3	0.186852
C20ORF100	chromosome 20 open reading frame 100	0.186694
CRIP1	cysteine-rich protein 1 (intestinal)	0.18664
WDR66	WD repeat domain 66	0.185925
PHLDA1	pleckstrin homology-like domain, family A, member 1	0.185698
ABI3	ABI gene family, member 3	0.185542
LOC100128975	null	0.185045
ZFP36L1	zinc finger protein 36, C3H type-like 1	0.184533
LHPP	-	0.184078
WNT5A	wingless-type MMTV integration site family, member 5A	0.18385
CD36	CD36 molecule (thrombospondin receptor)	0.183363
PODXL2	podocalyxin-like 2	0.182876
MMP7	matrix metallopeptidase 7 (matrilysin, uterine)	0.182823
LY9	lymphocyte antigen 9	0.182695
BEX1	brain expressed, X-linked 1	0.182659
LOC100131139	null	0.182098
LSAMP	limbic system-associated membrane protein	0.181565
U2AF1L4	U2 small nuclear RNA auxiliary factor 1-like 4	0.181118
PTPN22	protein tyrosine phosphatase, non-receptor type 22 (lymphoid)	0.180935
BCL3	B-cell CLL/lymphoma 3	0.180839
MAP1LC3A	microtubule-associated protein 1 light chain 3 alpha	0.18062
UCA1	-	0.180397
LOC440157	-	0.179709
FAM81A	family with sequence similarity 81, member A	0.179575
2001-03-01	membrane-associated ring finger (C3HC4) 1	0.179251
TRAF5	TNF receptor-associated factor 5	0.178299
CERK	ceramide kinase	0.178291
LOC283663	-	0.178173
LPAR5	null	0.177988
IGSF3	immunoglobulin superfamily, member 3	0.177524
LDLR	low density lipoprotein receptor (familial hypercholesterolemia)	0.176408
SAMSN1	SAM domain, SH3 domain and nuclear localisation signals, 1	0.176255
AICDA	activation-induced cytidine deaminase	0.175867
LOC645638	-	0.175696
ENO2	enolase 2 (gamma, neuronal)	0.175352
EPHB1	EPH receptor B1	0.175091
MS4A1	membrane-spanning 4-domains, subfamily A, member 1	0.174996
SERPINA9	serpin peptidase inhibitor, clade A (alpha-1 antiproteinase, antitrypsin), member 9	0.174411
DEF8	null	0.174331
CT45A6	null	0.174051
RDM1	RAD52 motif 1	0.173621
SLC25A23	solute carrier family 25 (mitochondrial carrier; phosphate carrier), member 23	0.173568
MST1	macrophage stimulating 1 (hepatocyte growth factor-like)	0.173438
LOC649856	null	0.173418
TIAM2	T-cell lymphoma invasion and metastasis 2	0.172656
ITGAL	integrin, alpha L (antigen CD11A (p180), lymphocyte function-associated antigen 1; alpha polypeptide)	0.172404
TMEM149	transmembrane protein 149	0.172364
HOMO SAPIENS T CELL	null	0.172361
LAPTM4B	lysosomal associated protein transmembrane 4 beta	0.172202
TMEM118	transmembrane protein 118	0.172122
FAM174B	null	0.171998
STK17B	serine/threonine kinase 17b (apoptosis-inducing)	0.171787
PLEKHA1	pleckstrin homology domain containing, family A (phosphoinositide binding specific) member 1	0.171371
GCHFR	GTP cyclohydrolase I feedback regulator	0.170925
TGM2	transglutaminase 2 (C polypeptide, protein-glutamine-gamma-glutamyltransferase)	0.170393
MYO1G	myosin IG	0.17037
KAT2B	null	0.170065
FAM102A	family with sequence similarity 102, member A	0.169946
CBLB	Cas-Br-M (murine) ecotropic retroviral transforming sequence b	0.169882
AGENCOURT_6411402 NI	null	0.169767
SERPINE2	serpin peptidase inhibitor, clade E (nexin, plasminogen activator inhibitor type 1), member 2	0.169492
CD79A	CD79a molecule, immunoglobulin-associated alpha	0.169418
LAG3	lymphocyte-activation gene 3	0.169371
DPYSL2	dihydropyrimidinase-like 2	0.169218
LOC440928	null	0.169062
LOC100130229	null	0.16891
RGPD8	RANBP2-like and GRIP domain containing 8	0.168804
CAMK2N1	calcium/calmodulin-dependent protein kinase II inhibitor 1	0.168691
OAS3	2'-5'-oligoadenylate synthetase 3, 100kDa	0.168274
SORL1	sortilin-related receptor, L(DLR class) A repeats-containing	0.16812
LOC100134134	null	0.167537
PKIG	protein kinase (cAMP-dependent, catalytic) inhibitor gamma	0.16721
FYN	FYN oncogene related to SRC, FGR, YES	0.167158
FCGR2B	Fc fragment of IgG, low affinity IIb, receptor (CD32)	0.167036
JAM3	junctional adhesion molecule 3	0.166999
GSTM2	glutathione S-transferase M2 (muscle)	0.166796
BTG2	BTG family, member 2	0.166765
MYBL1	v-myb myeloblastosis viral oncogene homolog (avian)-like 1	0.166061
TMEM170B	null	0.165894
CRYM	crystallin, mu	0.165401
LBH	-	0.165358
KLHL14	kelch-like 14 (Drosophila)	0.164944
ENPP4	ectonucleotide pyrophosphatase/phosphodiesterase 4 (putative function)	0.164882
FAM113B	family with sequence similarity 113, member B	0.164485
HIVEP1	human immunodeficiency virus type I enhancer binding protein 1	0.164259
CD300A	CD300a molecule	0.164144
FCRL5	Fc receptor-like 5	0.163996
ZFP82	null	0.163973
LOC730517	-	0.163774
LOC402221	-	0.163756
FAM134B	null	0.163486
KIAA0125	KIAA0125	0.163472
CEP192	centrosomal protein 192kDa	0.163021
FGR	Gardner-Rasheed feline sarcoma viral (v-fgr) oncogene homolog	0.162966
DAPL1	death associated protein-like 1	0.162728
PCGF2	polycomb group ring finger 2	0.16268
IRAK2	interleukin-1 receptor-associated kinase 2	0.162549
VCX	variable charge, X-linked	0.162394
ANXA1	annexin A1	0.162335
ZNF91	zinc finger protein 91	0.162014
FSTL5	follistatin-like 5	0.161934
ZIC2	Zic family member 2 (odd-paired homolog, Drosophila)	0.161903
LILRA4	leukocyte immunoglobulin-like receptor, subfamily A (with TM domain), member 4	0.161683
ID2	inhibitor of DNA binding 2, dominant negative helix-loop-helix protein	0.161544
ARHGAP24	Rho GTPase activating protein 24	0.161413
FLJ22184	-	0.161201
KIF20B	null	0.161022
RUNDC2C	RUN domain containing 2C	0.160642
DNASE1L3	deoxyribonuclease I-like 3	0.159948
RP5-1022P6.2	-	0.159937
ADARB1	adenosine deaminase, RNA-specific, B1 (RED1 homolog rat)	0.159514
SUSD3	sushi domain containing 3	0.159159
ENTPD1	ectonucleoside triphosphate diphosphohydrolase 1	0.159126
PANK1	pantothenate kinase 1	0.158488
ZFP36	zinc finger protein 36, C3H type, homolog (mouse)	0.158483
CXXC5	CXXC finger 5	0.158336
OVOL2	ovo-like 2 (Drosophila)	0.157681
LOC100129144	null	0.157578
MT1A	metallothionein 1A (functional)	0.156761
TEAD2	TEA domain family member 2	0.155829
CEACAM1	carcinoembryonic antigen-related cell adhesion molecule 1 (biliary glycoprotein)	0.155768
FUT8	fucosyltransferase 8 (alpha (1,6) fucosyltransferase)	0.155487
ZFP90	zinc finger protein 90 homolog (mouse)	0.155417
GALC	galactosylceramidase	0.155021
AKAP12	A kinase (PRKA) anchor protein (gravin) 12	0.154481
LOC652694	-	0.154318
LY86	lymphocyte antigen 86	0.154293
LOC642570	null	0.154253
INPP5J	null	0.154141
NCOA3	nuclear receptor coactivator 3	0.154107
ZNF788	zinc finger family member 788	0.154068
ARMCX5	armadillo repeat containing, X-linked 5	0.153782
LOC644936	-	0.153694
ZMYM2	zinc finger, MYM-type 2	0.153647
ZNF711	zinc finger protein 711	0.15363
USP4	ubiquitin specific peptidase 4 (proto-oncogene)	0.153615
CD8A	CD8a molecule	0.153596
HAVCR2	hepatitis A virus cellular receptor 2	0.153554
FLJ10916	-	0.153286
PIP4K2A	null	0.153186
IDI1	isopentenyl-diphosphate delta isomerase 1	0.152958
NLGN4X	neuroligin 4, X-linked	0.152873
GZMB	granzyme B (granzyme 2, cytotoxic T-lymphocyte-associated serine esterase 1)	0.152574
BIRC3	baculoviral IAP repeat-containing 3	0.152476
TOX	-	0.152364
SIDT2	SID1 transmembrane family, member 2	0.151916
CX3CL1	chemokine (C-X3-C motif) ligand 1	0.151874
CCL3L3	chemokine (C-C motif) ligand 3-like 3	0.151631
SP140	SP140 nuclear body protein	0.151535
ZNF415	zinc finger protein 415	0.151531
GSTM1	glutathione S-transferase M1	0.151429
VAMP1	vesicle-associated membrane protein 1 (synaptobrevin 1)	0.151086
GPRC5C	G protein-coupled receptor, family C, group 5, member C	0.151051
DSG2	desmoglein 2	0.150998
PFKL	phosphofructokinase, liver	0.15097
CAND2	cullin-associated and neddylation-dissociated 2 (putative)	0.150734
LOC339352	-	0.150598
IL17RB	interleukin 17 receptor B	0.150509
FAM30A	family with sequence similarity 30, member A	0.150195
ABHD8	abhydrolase domain containing 8	0.150083
FJX1	four jointed box 1 (Drosophila)	0.149941
RAI14	retinoic acid induced 14	0.149723
ASCL1	achaete-scute complex-like 1 (Drosophila)	0.149021
GPR137B	G protein-coupled receptor 137B	0.148986
MGC33556	-	0.148885
MT1E	metallothionein 1E (functional)	0.148724
RABGAP1	RAB GTPase activating protein 1	0.148272
LOC642477	null	0.148202
SNRPN	small nuclear ribonucleoprotein polypeptide N	0.148147
NAB1	NGFI-A binding protein 1 (EGR1 binding protein 1)	0.147947
FAM127A	null	0.147411
LOC100130298	null	0.147394
PTGS1	prostaglandin-endoperoxide synthase 1 (prostaglandin G/H synthase and cyclooxygenase)	0.147354
PELI1	pellino homolog 1 (Drosophila)	0.147097
PFTK1	PFTAIRE protein kinase 1	0.147074
SDCBP	syndecan binding protein (syntenin)	0.146786
QPRT	quinolinate phosphoribosyltransferase (nicotinate-nucleotide pyrophosphorylase (carboxylating))	0.146126
GCNT2	glucosaminyl (N-acetyl) transferase 2, I-branching enzyme (I blood group)	0.146105
VCX3A	variable charge, X-linked 3A	0.146058
FSD1	fibronectin type III and SPRY domain containing 1	0.145891
LRRN3	leucine rich repeat neuronal 3	0.145092
VNN2	vanin 2	0.145023
ADAP2	null	0.144707
DENND5B	null	0.144555
C17ORF87	null	0.144419
LRRK2	leucine-rich repeat kinase 2	0.144286
FADS1	fatty acid desaturase 1	0.144148
PDE6B	phosphodiesterase 6B, cGMP-specific, rod, beta (congenital stationary night blindness 3, autosomal dominant)	0.144105
CD79B	CD79b molecule, immunoglobulin-associated beta	0.14408
FCRL4	Fc receptor-like 4	0.144045
TMEM91	transmembrane protein 91	0.143765
ZNF681	zinc finger protein 681	0.143694
CCDC28B	coiled-coil domain containing 28B	0.143514
SIGLEC14	null	0.143402
SLC30A3	solute carrier family 30 (zinc transporter), member 3	0.143187
C13ORF27	chromosome 13 open reading frame 27	0.142792
SLC44A2	solute carrier family 44, member 2	0.142668
BX097705 NCI_CGAP_KI	null	0.142605
FAM171A1	null	0.142398
PSRC1	proline/serine-rich coiled-coil 1	0.142334
SLC35F5	solute carrier family 35, member F5	0.142317
STC2	stanniocalcin 2	0.142239
SC4MOL	sterol-C4-methyl oxidase-like	0.142222
KCNMB2	potassium large conductance calcium-activated channel, subfamily M, beta member 2	0.141865
C19ORF66	null	0.141712
ZNF613	zinc finger protein 613	0.141469
ALCAM	activated leukocyte cell adhesion molecule	0.141364
SLC23A2	solute carrier family 23 (nucleobase transporters), member 2	0.141299
MAGEB1	melanoma antigen family B, 1	0.140738
BTG1	B-cell translocation gene 1, anti-proliferative	0.140633
SLC45A3	solute carrier family 45, member 3	0.140302
RAB25	RAB25, member RAS oncogene family	0.140216
AKIRIN2	null	0.140118
PLEKHF2	pleckstrin homology domain containing, family F (with FYVE domain) member 2	0.139986
PLCG2	phospholipase C, gamma 2 (phosphatidylinositol-specific)	0.139851
GNG8	guanine nucleotide binding protein (G protein), gamma 8	0.139728
PRKAR1A	protein kinase, cAMP-dependent, regulatory, type I, alpha (tissue specific extinguisher 1)	0.139676
ZBTB32	zinc finger and BTB domain containing 32	0.139569
FAM117B	null	0.139454
ZNF608	zinc finger protein 608	0.139283
MAST3	microtubule associated serine/threonine kinase 3	0.138872
IQCG	IQ motif containing G	0.138624
C10ORF116	chromosome 10 open reading frame 116	0.138615
CD1C	CD1c molecule	0.138111
NMT2	N-myristoyltransferase 2	0.13797
ITM2A	integral membrane protein 2A	0.137965
PASK	PAS domain containing serine/threonine kinase	0.137912
SLC25A27	solute carrier family 25, member 27	0.137842
HES4	hairy and enhancer of split 4 (Drosophila)	0.137659
EPB41L5	erythrocyte membrane protein band 4.1 like 5	0.137658
KCNJ16	potassium inwardly-rectifying channel, subfamily J, member 16	0.136922
CLIP3	null	0.136916
OSBPL10	oxysterol binding protein-like 10	0.136621
INSIG1	insulin induced gene 1	0.136329
NAB2	NGFI-A binding protein 2 (EGR1 binding protein 2)	0.136284
FRMD4A	FERM domain containing 4A	0.136205
ZNF254	zinc finger protein 254	0.136172
CXCR4	chemokine (C-X-C motif) receptor 4	0.136037
IL4I1	interleukin 4 induced 1	0.135331
EDG4	endothelial differentiation, lysophosphatidic acid G-protein-coupled receptor, 4	0.135254
F5	coagulation factor V (proaccelerin, labile factor)	0.134905
RNF144	ring finger protein 144	0.134618
POTEF	null	0.134533
LOC440160	null	0.134403
BHLHE22	null	0.134363
IL4R	interleukin 4 receptor	0.13428
GAGE12I	null	0.13402
VCX-C	-	0.133942
F13A1	coagulation factor XIII, A1 polypeptide	0.133793
PDLIM7	PDZ and LIM domain 7 (enigma)	0.133784
STAG3	stromal antigen 3	0.133782
FXYD5	FXYD domain containing ion transport regulator 5	0.133677
PAPSS1	3'-phosphoadenosine 5'-phosphosulfate synthase 1	0.133286
TBC1D22A	TBC1 domain family, member 22A	0.133215
LY96	lymphocyte antigen 96	0.13315
P2RY10	purinergic receptor P2Y, G-protein coupled, 10	0.133095
CDH1	cadherin 1, type 1, E-cadherin (epithelial)	0.132985
DIP2C	DIP2 disco-interacting protein 2 homolog C (Drosophila)	0.132812
NDRG4	NDRG family member 4	0.132781
MATK	megakaryocyte-associated tyrosine kinase	0.132709
PRKCB1	protein kinase C, beta 1	0.132124
CNTNAP1	contactin associated protein 1	0.131928
PALLD	palladin, cytoskeletal associated protein	0.131778
NCF4	neutrophil cytosolic factor 4, 40kDa	0.131594
ARHGAP25	Rho GTPase activating protein 25	0.131571
BTLA	B and T lymphocyte associated	0.131239
LOC647450	-	0.131196
PYCARD	PYD and CARD domain containing	0.13112
IL27RA	interleukin 27 receptor, alpha	0.130978
HINT3	histidine triad nucleotide binding protein 3	0.130768
KANK1	null	0.130746
LYN	v-yes-1 Yamaguchi sarcoma viral related oncogene homolog	0.130532
ZMIZ1	null	0.130414
RAB8B	RAB8B, member RAS oncogene family	0.130388
TMEM185B	null	0.130252
EYA3	eyes absent homolog 3 (Drosophila)	0.129993
CXCL13	chemokine (C-X-C motif) ligand 13 (B-cell chemoattractant)	0.129959
SNX29	null	0.129952
CD83	CD83 molecule	0.12991
LHX2	LIM homeobox 2	0.129865
MX2	myxovirus (influenza virus) resistance 2 (mouse)	0.129864
KLHL5	kelch-like 5 (Drosophila)	0.129836
SGPP1	sphingosine-1-phosphate phosphatase 1	0.129788
RBM5	RNA binding motif protein 5	0.129747
ZNF493	zinc finger protein 493	0.129735
C16ORF87	null	0.129702
SSH2	slingshot homolog 2 (Drosophila)	0.129607
SORBS2	sorbin and SH3 domain containing 2	0.129463
FARP1	FERM, RhoGEF (ARHGEF) and pleckstrin domain protein 1 (chondrocyte-derived)	0.129447
FEZ1	fasciculation and elongation protein zeta 1 (zygin I)	0.129368
STAM	signal transducing adaptor molecule (SH3 domain and ITAM motif) 1	0.129193
SNORD3A	null	0.129147
UGCG	UDP-glucose ceramide glucosyltransferase	0.129089
IFI27L2	null	0.129067
ITGAX	integrin, alpha X (complement component 3 receptor 4 subunit)	0.129021
NFIB	nuclear factor I/B	0.129004
2001-09-01	septin 1	0.128899
BMP7	bone morphogenetic protein 7 (osteogenic protein 1)	0.128572
LOC653596	null	0.128554
ARL6IP5	ADP-ribosylation-like factor 6 interacting protein 5	0.128439
ALPL	alkaline phosphatase, liver/bone/kidney	0.128323
SLC26A6	solute carrier family 26, member 6	0.128122
ACP5	acid phosphatase 5, tartrate resistant	0.127903
GAD1	glutamate decarboxylase 1 (brain, 67kDa)	0.12789
HSZFP36	-	0.127755
PEG10	paternally expressed 10	0.127724
TIPARP	TCDD-inducible poly(ADP-ribose) polymerase	0.127719
CPNE8	copine VIII	0.127617
MGC26718	-	0.127285
RELL2	null	0.12709
BEND5	null	0.126933
CCDC91	coiled-coil domain containing 91	0.126746
KLF6	Kruppel-like factor 6	0.126723
ATM	ataxia telangiectasia mutated (includes complementation groups A, C and D)	0.126541
LOC647886	-	0.12643
SNX10	sorting nexin 10	0.126426
DBP	D site of albumin promoter (albumin D-box) binding protein	0.126369
TCEAL1	transcription elongation factor A (SII)-like 1	0.126261
CEBPA	CCAAT/enhancer binding protein (C/EBP), alpha	0.125994
KBTBD8	kelch repeat and BTB (POZ) domain containing 8	0.125969
TAGAP	T-cell activation GTPase activating protein	0.125534
NRGN	neurogranin (protein kinase C substrate, RC3)	0.125408
CA9	carbonic anhydrase IX	0.125322
NFKBIE	nuclear factor of kappa light polypeptide gene enhancer in B-cells inhibitor, epsilon	0.125213
SQLE	squalene epoxidase	0.125178
LMTK3	lemur tyrosine kinase 3	0.125059
ZNF823	null	0.124901
LOC651957	null	0.124667
SRC	v-src sarcoma (Schmidt-Ruppin A-2) viral oncogene homolog (avian)	0.124583
MYO1E	myosin IE	0.124326
LRRC32	leucine rich repeat containing 32	0.124283
TMEM98	transmembrane protein 98	0.124272
IFNGR1	interferon gamma receptor 1	0.124169
SERPINB6	serpin peptidase inhibitor, clade B (ovalbumin), member 6	0.124125
ACSF2	null	0.123872
RNASET2	ribonuclease T2	0.123866
LOC653515	null	0.123815
DUSP2	dual specificity phosphatase 2	0.123794
ZNF589	zinc finger protein 589	0.123787
IMPA1	inositol(myo)-1(or 4)-monophosphatase 1	0.123783
SNX26	sorting nexin 26	0.123744
NKX3-1	NK3 transcription factor related, locus 1 (Drosophila)	0.123741
RNU11	RNA, U11 small nuclear	0.123649
C6ORF111	chromosome 6 open reading frame 111	0.12361
SLC29A4	solute carrier family 29 (nucleoside transporters), member 4	0.123562
FAM46C	family with sequence similarity 46, member C	0.123511
WDR33	WD repeat domain 33	0.123446
LIPA	lipase A, lysosomal acid, cholesterol esterase (Wolman disease)	0.123275
FAM49A	family with sequence similarity 49, member A	0.123267
MAPK8IP3	mitogen-activated protein kinase 8 interacting protein 3	0.123195
ASMTL	acetylserotonin O-methyltransferase-like	0.123126
GRAMD3	GRAM domain containing 3	0.123074
EVI2A	ecotropic viral integration site 2A	0.122841
HSPB1	heat shock 27kDa protein 1	0.122723
GAGE12C	G antigen 12C	0.12262
POU2AF1	POU domain, class 2, associating factor 1	0.122392
DKFZP686O24166	-	0.122177
GCA	grancalcin, EF-hand calcium binding protein	0.122177
LOC400879	-	0.122144
VPS37D	vacuolar protein sorting 37 homolog D (S. cerevisiae)	0.122119
C7ORF10	chromosome 7 open reading frame 10	0.121734
SLC25A20	solute carrier family 25 (carnitine/acylcarnitine translocase), member 20	0.121715
RBM6	RNA binding motif protein 6	0.121646
PDCD4	programmed cell death 4 (neoplastic transformation inhibitor)	0.121592
ENC1	ectodermal-neural cortex (with BTB-like domain)	0.121549
NAGK	N-acetylglucosamine kinase	0.121526
LOC654191	null	0.12149
GNE	glucosamine (UDP-N-acetyl)-2-epimerase/N-acetylmannosamine kinase	0.121322
PNMAL1	null	0.121202
CHFR	checkpoint with forkhead and ring finger domains	0.12115
KIF5C	kinesin family member 5C	0.12093
CPLX1	complexin 1	0.120909
USP34	ubiquitin specific peptidase 34	0.120754
RAC2	ras-related C3 botulinum toxin substrate 2 (rho family, small GTP binding protein Rac2)	0.120722
SLC16A9	solute carrier family 16, member 9 (monocarboxylic acid transporter 9)	0.120562
SNX16	sorting nexin 16	0.120227
POLD4	polymerase (DNA-directed), delta 4	0.120203
ZNF816A	null	0.120017
GAGE4	G antigen 4	0.119995
C1ORF115	chromosome 1 open reading frame 115	0.119905
TWSG1	twisted gastrulation homolog 1 (Drosophila)	0.119873
ARHGAP17	Rho GTPase activating protein 17	0.11973
HERC4	hect domain and RLD 4	0.119729
APOC1	apolipoprotein C-I	0.119459
MTAP	methylthioadenosine phosphorylase	0.11933
ALDH1A1	aldehyde dehydrogenase 1 family, member A1	0.119113
LOC732432	-	0.119048
GPR137C	G protein-coupled receptor 137C	0.119025
ENPP5	ectonucleotide pyrophosphatase/phosphodiesterase 5 (putative function)	0.118961
RGS12	regulator of G-protein signalling 12	0.118933
SFRS18	null	0.118661
ZNF85	zinc finger protein 85	0.118659
OR13A1	olfactory receptor, family 13, subfamily A, member 1	0.118601
TUBB6	tubulin, beta 6	0.118566
CDC2L6	cell division cycle 2-like 6 (CDK8-like)	0.118447
LOC645037	-	0.118376
ARHGAP9	Rho GTPase activating protein 9	0.11811
SPRED1	sprouty-related, EVH1 domain containing 1	0.118089
BTBD16	BTB (POZ) domain containing 16	0.11801
KIAA1949	KIAA1949	0.117949
JUP	junction plakoglobin	0.117921
NAP1L3	nucleosome assembly protein 1-like 3	0.117893
AHSA2	AHA1, activator of heat shock 90kDa protein ATPase homolog 2 (yeast)	0.117641
LOC346887	-	0.117628
TNFAIP8L1	tumor necrosis factor, alpha-induced protein 8-like 1	0.117518
ABCA7	ATP-binding cassette, sub-family A (ABC1), member 7	0.117368
TMX3	null	0.117357
ZNF443	zinc finger protein 443	0.117302
PLIN2	null	0.117084
TTLL3	tubulin tyrosine ligase-like family, member 3	0.116998
SFMBT1	Scm-like with four mbt domains 1	0.116904
PARD6G	par-6 partitioning defective 6 homolog gamma (C. elegans)	0.116799
GPSM3	G-protein signalling modulator 3 (AGS3-like, C. elegans)	0.11676
ZNF215	zinc finger protein 215	0.11665
PTPRE	protein tyrosine phosphatase, receptor type, E	0.116484
ENOSF1	enolase superfamily member 1	0.116432
NEDD9	neural precursor cell expressed, developmentally down-regulated 9	0.116412
F12	coagulation factor XII (Hageman factor)	0.116402
ADRB2	adrenergic, beta-2-, receptor, surface	0.116339
NPHP3	nephronophthisis 3 (adolescent)	0.11622
ANKRD20A1	ankyrin repeat domain 20 family, member A1	0.11611
LARGE	like-glycosyltransferase	0.116004
PIGR	polymeric immunoglobulin receptor	0.115941
MGC72104	-	0.115922
RAB12	RAB12, member RAS oncogene family	0.115785
EP300	E1A binding protein p300	0.115752
CD82	CD82 molecule	0.115687
LBA1	-	0.11557
TMEM22	transmembrane protein 22	0.115357
PTPN12	protein tyrosine phosphatase, non-receptor type 12	0.11516
ZNF429	zinc finger protein 429	0.115155
LOC440345	-	0.115151
MTE	-	0.114994
ZNF217	zinc finger protein 217	0.114964
LOC642299	null	0.114658
EIF1B	eukaryotic translation initiation factor 1B	0.114638
LOC649179	-	0.114628
RNU4-1	null	0.114551
STRN3	striatin, calmodulin binding protein 3	0.114525
CNN2	calponin 2	0.114457
PIK3C2B	phosphoinositide-3-kinase, class 2, beta polypeptide	0.114399
GAGE12J	null	0.114363
ANGPTL6	angiopoietin-like 6	0.114284
TMEM107	transmembrane protein 107	0.114047
NLRP2	null	0.114042
IL13RA1	interleukin 13 receptor, alpha 1	0.114031
MAP4K1	mitogen-activated protein kinase kinase kinase kinase 1	0.11399
APEH	N-acylaminoacyl-peptide hydrolase	0.113772
DTX3	deltex 3 homolog (Drosophila)	0.113752
IRS1	insulin receptor substrate 1	0.113248
MGEA5	meningioma expressed antigen 5 (hyaluronidase)	0.113114
FLJ38717	-	0.113086
DEK	DEK oncogene (DNA binding)	0.113069
CMIP	-	0.112997
GADD45B	growth arrest and DNA-damage-inducible, beta	0.112995
RYR1	ryanodine receptor 1 (skeletal)	0.112977
C4ORF22	chromosome 4 open reading frame 22	0.112897
BRDG1	-	0.112662
CD86	CD86 molecule	0.112549
PRAGMIN	null	0.11245
PSIP1	PC4 and SFRS1 interacting protein 1	0.112416
GSDMB	null	0.1124
IRX3	iroquois homeobox protein 3	0.112316
GAGE5	G antigen 5	0.112173
RASGRP1	RAS guanyl releasing protein 1 (calcium and DAG-regulated)	0.112039
SFRS2IP	splicing factor, arginine/serine-rich 2, interacting protein	0.111941
HMGCR	3-hydroxy-3-methylglutaryl-Coenzyme A reductase	0.111836
KISS1R	KISS1 receptor	0.111751
BTAF1	BTAF1 RNA polymerase II, B-TFIID transcription factor-associated, 170kDa (Mot1 homolog, S. cerevisiae)	0.111616
MICAL1	microtubule associated monoxygenase, calponin and LIM domain containing 1	0.111587
LPAR2	null	0.111555
ZNF101	zinc finger protein 101	0.11153
VHL	von Hippel-Lindau tumor suppressor	0.111435
LOC283788	-	0.111412
SUSD1	sushi domain containing 1	0.111397
LOC727762	-	0.111311
PCDH9	protocadherin 9	0.111272
C11ORF41	chromosome 11 open reading frame 41	0.111266
PTOV1	prostate tumor overexpressed gene 1	0.111241
C1ORF85	chromosome 1 open reading frame 85	0.11106
TMEM134	transmembrane protein 134	0.111055
DKFZP761P0423	-	0.111051
ATP6V0A1	ATPase, H+ transporting, lysosomal V0 subunit a1	0.110868
FAM184A	null	0.110819
LOC652184	null	0.110766
LAX1	lymphocyte transmembrane adaptor 1	0.110652
LOC653071	-	0.110634
LOC653907	-	0.110622
CYB5R4	cytochrome b5 reductase 4	0.110514
KCNK1	potassium channel, subfamily K, member 1	0.110498
LOC390940	-	0.110487
BMPR1A	bone morphogenetic protein receptor, type IA	0.110251
TRIM38	tripartite motif-containing 38	0.110214
LOC441773	null	0.110144
GOLSYN	null	0.110121
FGD3	FYVE, RhoGEF and PH domain containing 3	0.109952
MAGEE1	melanoma antigen family E, 1	0.109797
PARP9	poly (ADP-ribose) polymerase family, member 9	0.109685
RHOH	ras homolog gene family, member H	0.109633
GAGE6	G antigen 6	0.109632
AIF1L	null	0.109545
SYPL1	synaptophysin-like 1	0.109482
GPR183	null	0.109379
RNU5A	RNA, U5A small nuclear	0.109328
RCAN2	null	0.109326
SIAH1	seven in absentia homolog 1 (Drosophila)	0.109284
LOC92249	-	0.109275
PBX3	pre-B-cell leukemia transcription factor 3	0.10923
PAFAH1B3	platelet-activating factor acetylhydrolase, isoform Ib, gamma subunit 29kDa	0.109206
STAP1	null	0.109146
KIAA1274	KIAA1274	0.109132
GEM	GTP binding protein overexpressed in skeletal muscle	0.109107
BATF	basic leucine zipper transcription factor, ATF-like	0.108976
GPR114	G protein-coupled receptor 114	0.108898
AV737943 CB HOMO SAP	null	0.108791
PLCB1	phospholipase C, beta 1 (phosphoinositide-specific)	0.108715
GALM	galactose mutarotase (aldose 1-epimerase)	0.108376
C9ORF72	chromosome 9 open reading frame 72	0.108365
CD53	CD53 molecule	0.108301
SNURF	SNRPN upstream reading frame	0.108264
FAM111A	family with sequence similarity 111, member A	0.108251
GAGE2B	null	0.108173
LOR	loricrin	0.108047
ROCK1	Rho-associated, coiled-coil containing protein kinase 1	0.108046
CENPK	centromere protein K	0.108043
CXCR5	null	0.108004
GAGE12H	G antigen 12H	0.107985
DLEU2	deleted in lymphocytic leukemia, 2	0.107858
NCF2	neutrophil cytosolic factor 2 (65kDa, chronic granulomatous disease, autosomal 2)	0.10765
CCDC106	coiled-coil domain containing 106	0.107562
KIAA0922	KIAA0922	0.107537
CLCN6	chloride channel 6	0.107518
KIAA1324L	KIAA1324-like	0.107375
CLECL1	null	0.107324
ATP6V0D1	ATPase, H+ transporting, lysosomal 38kDa, V0 subunit d1	0.107321
ZCCHC12	zinc finger, CCHC domain containing 12	0.107242
LOC727758	-	0.10724
FOS	v-fos FBJ murine osteosarcoma viral oncogene homolog	0.107089
HECW2	HECT, C2 and WW domain containing E3 ubiquitin protein ligase 2	0.10702
TH02B02.X1 NCI_CGAP_	null	0.107014
NEK6	NIMA (never in mitosis gene a)-related kinase 6	0.106924
SMAD6	SMAD, mothers against DPP homolog 6 (Drosophila)	0.106912
SPATS2	spermatogenesis associated, serine-rich 2	0.106904
LOC642946	null	0.106716
COL4A5	collagen, type IV, alpha 5 (Alport syndrome)	0.106685
CSK	c-src tyrosine kinase	0.106661
OTP	orthopedia homolog (Drosophila)	0.106539
DCAF6	null	0.106516
REEP2	receptor accessory protein 2	0.106436
FAM179B	null	0.106322
DENND4C	DENN/MADD domain containing 4C	0.106045
NIPA1	non imprinted in Prader-Willi/Angelman syndrome 1	0.106018
RAD21	RAD21 homolog (S. pombe)	0.10591
VAV1	vav 1 oncogene	0.105855
TUBB4	tubulin, beta 4	0.105632
SNORD3C	null	0.10563
LCK	lymphocyte-specific protein tyrosine kinase	0.10558
CD96	CD96 molecule	0.105527
TLE4	transducin-like enhancer of split 4 (E(sp1) homolog, Drosophila)	0.105503
PNPLA7	patatin-like phospholipase domain containing 7	0.105416
AKNA	AT-hook transcription factor	0.105389
TSPYL5	TSPY-like 5	0.105371
SYNE2	spectrin repeat containing, nuclear envelope 2	0.105303
C6ORF156	chromosome 6 open reading frame 156	0.105148
FULL-LENGTH CDNA CLO	null	0.105096
TSPAN9	tetraspanin 9	0.104725
P4HTM	null	0.104714
CCDC115	coiled-coil domain containing 115	0.104697
BANK1	B-cell scaffold protein with ankyrin repeats 1	0.104627
GPR160	G protein-coupled receptor 160	0.104595
MBIP	MAP3K12 binding inhibitory protein 1	0.104547
PRKCH	protein kinase C, eta	0.10454
DEM1	null	0.104493
CYP51A1	cytochrome P450, family 51, subfamily A, polypeptide 1	0.104419
PLAG1	pleiomorphic adenoma gene 1	0.104327
SH3BGRL	SH3 domain binding glutamic acid-rich protein like	0.1043
SGOL1	shugoshin-like 1 (S. pombe)	0.104205
LOC732075	-	0.104199
PIK3C2A	phosphoinositide-3-kinase, class 2, alpha polypeptide	0.104065
CD226	CD226 molecule	0.103968
PFKFB3	6-phosphofructo-2-kinase/fructose-2,6-biphosphatase 3	0.103951
MAD1L1	MAD1 mitotic arrest deficient-like 1 (yeast)	0.10376
SERTAD3	SERTA domain containing 3	0.103705
RRM2B	ribonucleotide reductase M2 B (TP53 inducible)	0.103656
CDK2	cyclin-dependent kinase 2	0.103483
MINPP1	multiple inositol polyphosphate histidine phosphatase, 1	0.103292
KANK2	null	0.103213
WDR37	WD repeat domain 37	0.103208
LOC653147	-	0.103187
LOC554206	-	0.10311
MANBA	mannosidase, beta A, lysosomal	0.103085
BHLHB9	basic helix-loop-helix domain containing, class B, 9	0.103076
MFGE8	milk fat globule-EGF factor 8 protein	0.102972
COL4A3	collagen, type IV, alpha 3 (Goodpasture antigen)	0.102838
PTPRG	protein tyrosine phosphatase, receptor type, G	0.102805
ENPP3	ectonucleotide pyrophosphatase/phosphodiesterase 3	0.102804
PDCD1	programmed cell death 1	0.102738
KIAA0913	KIAA0913	0.102719
HRK	harakiri, BCL2 interacting protein (contains only BH3 domain)	0.102707
PSCD4	pleckstrin homology, Sec7 and coiled-coil domains 4	0.102648
CFDP1	craniofacial development protein 1	0.10264
LOC400958	-	0.102633
ZNF792	zinc finger protein 792	0.102527
AMT	aminomethyltransferase	0.102342
IAH1	null	0.102232
TFCP2	transcription factor CP2	0.102172
ATP6V1G2	ATPase, H+ transporting, lysosomal 13kDa, V1 subunit G2	0.102167
SMARCA1	SWI/SNF related, matrix associated, actin dependent regulator of chromatin, subfamily a, member 1	0.102117
SPN	sialophorin (leukosialin, CD43)	0.102088
FUT11	fucosyltransferase 11 (alpha (1,3) fucosyltransferase)	0.101915
LOC647506	-	0.101873
TCTN1	null	0.101843
ZFP161	zinc finger protein 161 homolog (mouse)	0.101696
FBXW8	F-box and WD-40 domain protein 8	0.101484
ASAP3	null	0.101436
ELF4	E74-like factor 4 (ets domain transcription factor)	0.101414
VAPA	VAMP (vesicle-associated membrane protein)-associated protein A, 33kDa	0.101387
HNF1B	null	0.101385
LOC653800	-	0.101307
DUSP10	dual specificity phosphatase 10	0.101261
LQK1	-	0.101246
LOC647942	-	0.10123
SPRY2	sprouty homolog 2 (Drosophila)	0.101227
PLTP	phospholipid transfer protein	0.101157
HLA-DMB	major histocompatibility complex, class II, DM beta	0.101153
TAX1BP3	Tax1 (human T-cell leukemia virus type I) binding protein 3	0.10113
NINJ2	ninjurin 2	0.101119
RNF165	ring finger protein 165	0.101092
SLC38A1	solute carrier family 38, member 1	0.10106
PUS10	null	0.101039
SPOCK2	sparc/osteonectin, cwcv and kazal-like domains proteoglycan (testican) 2	0.100938
M6PRBP1	mannose-6-phosphate receptor binding protein 1	0.10092
PRRX1	paired related homeobox 1	0.1009
LOC100130179	null	0.100576
KIAA1598	KIAA1598	0.100468
BP873537 SUGANO CDNA	null	0.100424
CBL	Cas-Br-M (murine) ecotropic retroviral transforming sequence	0.100376
ZFP30	zinc finger protein 30 homolog (mouse)	0.100349
LRFN3	leucine rich repeat and fibronectin type III domain containing 3	0.10013
GLDC	glycine dehydrogenase (decarboxylating)	0.100127
UBE2H	ubiquitin-conjugating enzyme E2H (UBC8 homolog, yeast)	0.10007
LRP3	low density lipoprotein receptor-related protein 3	0.0997262
FOXO1	null	0.099681
FBXW4	F-box and WD-40 domain protein 4	0.0995521
RNF144A	null	0.0995208
WSB2	WD repeat and SOCS box-containing 2	0.099449
RNU1-5	null	0.0994061
CCL3	chemokine (C-C motif) ligand 3	0.0993812
RNU1G2	RNA, U1G2 small nuclear	0.0993414
PITPNC1	phosphatidylinositol transfer protein, cytoplasmic 1	0.0993106
LOC648814	null	0.0990398
PFKFB4	6-phosphofructo-2-kinase/fructose-2,6-biphosphatase 4	0.0989725
TMEM145	transmembrane protein 145	0.098884
SCN4A	sodium channel, voltage-gated, type IV, alpha	0.0988519
EIF2AK2	eukaryotic translation initiation factor 2-alpha kinase 2	0.0987325
RNU1-3	null	0.0987156
CA8	carbonic anhydrase VIII	0.0987148
CREB5	cAMP responsive element binding protein 5	0.0986686
PSTPIP2	proline-serine-threonine phosphatase interacting protein 2	0.0986492
KLF12	Kruppel-like factor 12	0.098539
ZNF239	zinc finger protein 239	0.0985034
RC5-ST0300-150200-01	null	0.0984576
SAT1	spermidine/spermine N1-acetyltransferase 1	0.098449
AV737317 CB HOMO SAP	null	0.0984167
RBL2	retinoblastoma-like 2 (p130)	0.0984021
ZNF30	zinc finger protein 30	0.098369
PTAFR	platelet-activating factor receptor	0.0983014
LOC727935	-	0.0982876
GRN	granulin	0.0982789
LOC650737	null	0.0982218
CIC	capicua homolog (Drosophila)	0.0981696
FOXP1	forkhead box P1	0.0980781
ARL6IP1	ADP-ribosylation factor-like 6 interacting protein 1	0.0979714
SWAP70	-	0.0979066
ACAT2	acetyl-Coenzyme A acetyltransferase 2 (acetoacetyl Coenzyme A thiolase)	0.0978745
ZNF260	zinc finger protein 260	0.0978172
MGST3	microsomal glutathione S-transferase 3	0.0978074
BX099724 SOARES_FETA	null	0.0977513
MRPS6	mitochondrial ribosomal protein S6	0.0976811
ZNF483	zinc finger protein 483	0.0976039
LOC338758	-	0.0974805
SUMO1P1	null	0.0973031
TMEM188	null	0.0972684
RERE	arginine-glutamic acid dipeptide (RE) repeats	0.097128
TTK	TTK protein kinase	0.0970575
HSD17B11	null	0.0970437
PRKCB	null	0.0969668
PROM1	prominin 1	0.0968521
AK3	adenylate kinase 3	0.096816
GLG1	golgi apparatus protein 1	0.0968041
DBNDD1	dysbindin (dystrobrevin binding protein 1) domain containing 1	0.09676
E2F5	E2F transcription factor 5, p130-binding	0.0967228
ZNF135	zinc finger protein 135	0.096701
FLJ10781	-	0.0966976
KRTCAP3	keratinocyte associated protein 3	0.0966814
CUEDC1	CUE domain containing 1	0.0966658
APAF1	apoptotic peptidase activating factor	0.0965372
LOC645241	null	0.09652
LYPD6B	null	0.0964114
HMGCS1	3-hydroxy-3-methylglutaryl-Coenzyme A synthase 1 (soluble)	0.0962999
RAB5A	RAB5A, member RAS oncogene family	0.0962653
SGK1	null	0.096263
IL7	interleukin 7	0.0961921
OSBPL8	oxysterol binding protein-like 8	0.0960453
ATG4B	ATG4 autophagy related 4 homolog B (S. cerevisiae)	0.0957734
BBS2	Bardet-Biedl syndrome 2	0.0957637
SEC14L1	SEC14-like 1 (S. cerevisiae)	0.0955283
C18ORF19	chromosome 18 open reading frame 19	0.0955028
MGC42630	-	0.0954635
C12ORF35	chromosome 12 open reading frame 35	0.0954021
FKBP14	FK506 binding protein 14, 22 kDa	0.0953366
ZNF433	zinc finger protein 433	0.0952893
CCNG2	cyclin G2	0.095267
PTGDR	prostaglandin D2 receptor (DP)	0.0952215
AGENCOURT_7543948 NI	null	0.0952146
LOC648473	-	0.0951894
MOBKL1A	MOB1, Mps One Binder kinase activator-like 1A (yeast)	0.0951251
PCNX	pecanex homolog (Drosophila)	0.0951178
APOBEC3D	apolipoprotein B mRNA editing enzyme, catalytic polypeptide-like 3D (putative)	0.0950757
SLC46A3	null	0.0950704
TMC6	transmembrane channel-like 6	0.0950639
SIPA1	signal-induced proliferation-associated gene 1	0.0950417
TXNIP	thioredoxin interacting protein	0.0950383
MFHAS1	malignant fibrous histiocytoma amplified sequence 1	0.0950383
TUBB2A	tubulin, beta 2A	0.094992
UGT2B17	UDP glucuronosyltransferase 2 family, polypeptide B17	0.0948829
C19ORF36	chromosome 19 open reading frame 36	0.0948678
POLR2D	polymerase (RNA) II (DNA directed) polypeptide D	0.094836
GAGE12G	G antigen 12G	0.0947391
HLA-DMA	major histocompatibility complex, class II, DM alpha	0.0947206
MDM4	Mdm4, transformed 3T3 cell double minute 4, p53 binding protein (mouse)	0.0946218
ZNF175	zinc finger protein 175	0.0946215
SLC47A1	null	0.09443
RNMT	RNA (guanine-7-) methyltransferase	0.0944048
LASP1	LIM and SH3 protein 1	0.094335
EPS15L1	epidermal growth factor receptor pathway substrate 15-like 1	0.0943293
BLNK	B-cell linker	0.0941507
IL10RA	interleukin 10 receptor, alpha	0.0941306
PIP5K2A	phosphatidylinositol-4-phosphate 5-kinase, type II, alpha	0.0940606
BLVRB	biliverdin reductase B (flavin reductase (NADPH))	0.0939617
RAB23	RAB23, member RAS oncogene family	0.0938662
CAB39L	calcium binding protein 39-like	0.0937175
ABI1	abl-interactor 1	0.093693
UBR5	null	0.0936367
DUSP16	dual specificity phosphatase 16	0.0935367
CEPT1	choline/ethanolamine phosphotransferase 1	0.0933354
TSEN34	tRNA splicing endonuclease 34 homolog (S. cerevisiae)	0.0933074
FLJ44124	-	0.0933059
LRMP	lymphoid-restricted membrane protein	0.0932757
LOC654096	null	0.0932485
ZNF154	zinc finger protein 154	0.093153
LOC729255	-	0.0931221
LOC202781	-	0.0930892
MFSD10	null	0.0930875
RBM38	RNA binding motif protein 38	0.0929784
TMEM191B	null	0.0929317
STEAP1	six transmembrane epithelial antigen of the prostate 1	0.0928818
KIAA0261	null	0.0927666
LOC283481	-	0.092702
NSF	N-ethylmaleimide-sensitive factor	0.092671
LOC100129466	null	0.0926525
ATAD2	ATPase family, AAA domain containing 2	0.0926456
ACY3	aspartoacylase (aminocyclase) 3	0.0926237
WASF3	WAS protein family, member 3	0.092347
VCPIP1	valosin containing protein (p97)/p47 complex interacting protein 1	0.0923441
RNGTT	RNA guanylyltransferase and 5'-phosphatase	0.0923348
KIF7	kinesin family member 7	0.0923313
TLR6	toll-like receptor 6	0.092285
PECAM1	platelet/endothelial cell adhesion molecule (CD31 antigen)	0.0922229
FBXO10	F-box protein 10	0.0921959
SNORD3D	null	0.09212
LOC100132439	null	0.0921143
ST8SIA4	ST8 alpha-N-acetyl-neuraminide alpha-2,8-sialyltransferase 4	0.0920785
LOC648343	-	0.0920014
ACTR3	ARP3 actin-related protein 3 homolog (yeast)	0.0919905
TNFRSF13C	tumor necrosis factor receptor superfamily, member 13C	0.0919375
PTPLAD1	protein tyrosine phosphatase-like A domain containing 1	0.0918236
LCOR	ligand dependent nuclear receptor corepressor	0.091792
ZNF529	zinc finger protein 529	0.0917581
ITFG1	integrin alpha FG-GAP repeat containing 1	0.0917217
UBE2L6	ubiquitin-conjugating enzyme E2L 6	0.0916987
SPA17	sperm autoantigenic protein 17	0.0915561
CCL3L1	chemokine (C-C motif) ligand 3-like 1	0.0915474
RASA1	RAS p21 protein activator (GTPase activating protein) 1	0.0915276
GDI2	GDP dissociation inhibitor 2	0.0914585
CCDC12	coiled-coil domain containing 12	0.0913991
ZBTB5	zinc finger and BTB domain containing 5	0.0913796
BMF	Bcl2 modifying factor	0.0912425
TMEM77	transmembrane protein 77	0.0912034
TTC9	tetratricopeptide repeat domain 9	0.0911706
CHMP1B	chromatin modifying protein 1B	0.0909518
SSTR2	somatostatin receptor 2	0.0909421
NR3C1	nuclear receptor subfamily 3, group C, member 1 (glucocorticoid receptor)	0.090903
ABCA1	ATP-binding cassette, sub-family A (ABC1), member 1	0.090888
MAN2B1	mannosidase, alpha, class 2B, member 1	0.0908416
USP49	ubiquitin specific peptidase 49	0.0908369
HCN3	hyperpolarization activated cyclic nucleotide-gated potassium channel 3	0.0907975
NCKAP1L	NCK-associated protein 1-like	0.090778
TANK	TRAF family member-associated NFKB activator	0.0907546
LCT	lactase	0.0906619
ACTR2	ARP2 actin-related protein 2 homolog (yeast)	0.0905685
FBP2	fructose-1,6-bisphosphatase 2	0.0905016
ENPP2	ectonucleotide pyrophosphatase/phosphodiesterase 2 (autotaxin)	0.0904519
SERPINI1	serpin peptidase inhibitor, clade I (neuroserpin), member 1	0.0904413
IL2RA	interleukin 2 receptor, alpha	0.0903851
VSNL1	visinin-like 1	0.0901378
ZNF264	zinc finger protein 264	0.0900509
ADAM8	ADAM metallopeptidase domain 8	0.0900033
CHKB	choline kinase beta	0.0899714
FES	feline sarcoma oncogene	0.0899256
TMEM159	transmembrane protein 159	0.0898868
SYT4	synaptotagmin IV	0.0898254
ATP5S	ATP synthase, H+ transporting, mitochondrial F0 complex, subunit s (factor B)	0.0898231
ACPP	acid phosphatase, prostate	0.0897583
NICN1	nicolin 1	0.0896852
AGPAT9	null	0.0896541
B3GNT2	UDP-GlcNAc:betaGal beta-1,3-N-acetylglucosaminyltransferase 2	0.0896142
AV681673 GKB HOMO SA	null	0.0895942
RAB5B	RAB5B, member RAS oncogene family	0.0895237
SHISA5	null	0.0894074
FLJ20920	-	0.0893849
SCML1	sex comb on midleg-like 1 (Drosophila)	0.0892571
ELL3	elongation factor RNA polymerase II-like 3	0.0892475
GALT	galactose-1-phosphate uridylyltransferase	0.0891528
C7ORF46	chromosome 7 open reading frame 46	0.0890659
GAGE12B	G antigen 12B	0.088975
CLCC1	chloride channel CLIC-like 1	0.0889714
HOXC6	homeobox C6	0.0889508
GLRX	glutaredoxin (thioltransferase)	0.0888957
LOC646214	-	0.0888482
GPR1	G protein-coupled receptor 1	0.0887576
ZNF514	zinc finger protein 514	0.088687
CYTIP	null	0.0886262
PTGR2	null	0.088622
GAGE12F	G antigen 12F	0.0885987
RAB40B	RAB40B, member RAS oncogene family	0.0885481
POLQ	polymerase (DNA directed), theta	0.0883681
CSAD	cysteine sulfinic acid decarboxylase	0.0883641
FAM73A	family with sequence similarity 73, member A	0.0882955
TNFSF8	tumor necrosis factor (ligand) superfamily, member 8	0.0882785
GNG2	guanine nucleotide binding protein (G protein), gamma 2	0.0882748
C20ORF196	chromosome 20 open reading frame 196	0.0882555
CCR10	chemokine (C-C motif) receptor 10	0.0882339
DDX3X	DEAD (Asp-Glu-Ala-Asp) box polypeptide 3, X-linked	0.0881882
DAZAP2	DAZ associated protein 2	0.0881472
ALOX5AP	arachidonate 5-lipoxygenase-activating protein	0.0880598
SPSB1	splA/ryanodine receptor domain and SOCS box containing 1	0.088004
EDN1	endothelin 1	0.0878826
BFSP2	beaded filament structural protein 2, phakinin	0.0878498
CYTH4	null	0.087821
ANAPC1	anaphase promoting complex subunit 1	0.0877795
RAB3GAP1	RAB3 GTPase activating protein subunit 1 (catalytic)	0.087698
C18ORF10	chromosome 18 open reading frame 10	0.0875687
TXNDC16	null	0.0875557
C20ORF127	chromosome 20 open reading frame 127	0.0875036
ZNF138	zinc finger protein 138	0.0875007
DHRS2	dehydrogenase/reductase (SDR family) member 2	0.0874245
SH3BP1	SH3-domain binding protein 1	0.0874241
SMCR5	Smith-Magenis syndrome chromosome region, candidate 5	0.0874197
BIK	BCL2-interacting killer (apoptosis-inducing)	0.0872632
SPOPL	null	0.0872581
HOMER3	homer homolog 3 (Drosophila)	0.087227
C2ORF56	null	0.0871583
MIAT	null	0.0871535
LOC645058	null	0.0870352
PHYHD1	phytanoyl-CoA dioxygenase domain containing 1	0.0870249
LOC642181	null	0.0869963
ARFGEF1	ADP-ribosylation factor guanine nucleotide-exchange factor 1(brefeldin A-inhibited)	0.0869952
MTHFR	5,10-methylenetetrahydrofolate reductase (NADPH)	0.0869783
TIA1	TIA1 cytotoxic granule-associated RNA binding protein	0.0869467
RGS20	regulator of G-protein signalling 20	0.0869286
CDC14B	CDC14 cell division cycle 14 homolog B (S. cerevisiae)	0.0868502
TMEM131	transmembrane protein 131	0.0868
CCDC126	coiled-coil domain containing 126	0.0867968
VAMP5	vesicle-associated membrane protein 5 (myobrevin)	0.08665
DYNC1I2	dynein, cytoplasmic 1, intermediate chain 2	0.0866144
CLK1	CDC-like kinase 1	0.086559
HLA-DRB1	major histocompatibility complex, class II, DR beta 1	0.0865451
MED25	mediator of RNA polymerase II transcription, subunit 25 homolog (S. cerevisiae)	0.0864868
MSH2	mutS homolog 2, colon cancer, nonpolyposis type 1 (E. coli)	0.0863864
TUBA4A	null	0.0863199
SNTB2	syntrophin, beta 2 (dystrophin-associated protein A1, 59kDa, basic component 2)	0.086239
HEATR5B	null	0.0861851
EEF2K	eukaryotic elongation factor-2 kinase	0.0860423
LASS6	LAG1 homolog, ceramide synthase 6 (S. cerevisiae)	0.0859651
PFKM	phosphofructokinase, muscle	0.0859485
LOC100132499	null	0.0859061
ARHGAP15	Rho GTPase activating protein 15	0.0858619
SGSM2	null	0.0858601
LOC728755	-	0.0858403
NOTCH4	Notch homolog 4 (Drosophila)	0.0858355
FEZ2	fasciculation and elongation protein zeta 2 (zygin II)	0.0858118
CAPNS1	calpain, small subunit 1	0.0857513
LOC649923	null	0.0856408
HPS1	Hermansky-Pudlak syndrome 1	0.0855116
RHOG	ras homolog gene family, member G (rho G)	0.0854847
LOC651064	null	0.0852956
C3ORF59	chromosome 3 open reading frame 59	0.0852597
IRF9	null	0.0852214
IL17RD	interleukin 17 receptor D	0.085193
LOC653583	-	0.0850783
SMAD3	SMAD, mothers against DPP homolog 3 (Drosophila)	0.0850741
CYBASC3	cytochrome b, ascorbate dependent 3	0.0850543
LOC728802	-	0.0850022
LOC730455	-	0.0849535
LOC646463	-	0.0849487
DYRK1A	dual-specificity tyrosine-(Y)-phosphorylation regulated kinase 1A	0.0849243
CCNL1	cyclin L1	0.08492
EGR3	early growth response 3	0.0849026
C9ORF45	chromosome 9 open reading frame 45	0.0848762
ITGB5	integrin, beta 5	0.0848588
CRB3	crumbs homolog 3 (Drosophila)	0.0848523
ECH1	enoyl Coenzyme A hydratase 1, peroxisomal	0.08483
MTA3	metastasis associated 1 family, member 3	0.0847346
TOX2	null	0.084709
MZF1	myeloid zinc finger 1	0.0846868
TLR9	toll-like receptor 9	0.0846502
ABR	active BCR-related gene	0.0846006
RNFT2	null	0.0845901
MAN2A1	mannosidase, alpha, class 2A, member 1	0.0845559
GAGE2E	null	0.0844333
TNRC6B	trinucleotide repeat containing 6B	0.0844248
ADORA3	adenosine A3 receptor	0.0843956
GNGT2	guanine nucleotide binding protein (G protein), gamma transducing activity polypeptide 2	0.0843859
GNPDA2	glucosamine-6-phosphate deaminase 2	0.0843661
IQCD	IQ motif containing D	0.0843494
CLEC17A	null	0.0842103
MYH10	myosin, heavy chain 10, non-muscle	0.0841733
LOC641825	null	0.0841726
FAM45A	family with sequence similarity 45, member A	0.0841622
[truncated: 33,896 more rows]
