# Supplementary material for: PQR309 Is a Novel Dual PI3K/mTOR Inhibitor with Preclinical Antitumor Activity in Lymphomas as a Single Agent and in Combination Therapy
Source: Oxford University Press journal article supplement (doi:10.1158/1078-0432.ccr-17-1041), 2017-10-24
Supplement: 10780432ccr171041-sup-181771_2_supp_4322361_1xm7fc.xlsx [file 10780432ccr171041-sup-181771_2_supp_4322361_1xm7fc.xlsx]

## Sheet: S2
Histology	cell line	Drug 1	Drug 2	class Drug 2	clinical approved Drug 2	Median Combination Index	95% Conf. Interval	Drug 1 concentration range (nM), 7 diluitions	Drug 2 concentration range (nM), 7 diluitions	IC50 Drug 1_nM	Bcl2 deregulation	References_Bcl2 deregulation	Bcl2 translocation	References_Bcl2 translocation	MYC translocation	References_MYC translocation	Myc deregulation	Reference_Myc deregulation	p53 inactive	References_p53 inactive
HL	AM-HLH	PQR309								>5000
GCB-DLBCL	DOHH2	PQR309	ARV-825	PROTAC BET inhibitor	no	0.97^	0.67-1.09	0-2000 (1:2)	0-50 (1:2)	1316.76	1	PMID 23291630	1	PMID 1849602	1	assessed by FISH	1		0	PMID 15188009
GCB-DLBCL	DOHH2	PQR309	AZD1208	PIM inhibitor	no	0.34*	0.31-0.41	0-5000 (1:2)	0-20000 (1:2)	1316.76	1	PMID 23291630	1	PMID 1849602	1	assessed by FISH	1		0	PMID 15188009
GCB-DLBCL	DOHH2	PQR309	metformin	anti-diabetic	yes	0.77*	0.68-0.89	0-2000 (1:2)	0-60000000 (1:2)	1316.76	1	PMID 23291630	1	PMID 1849602	1	assessed by FISH	1		0	PMID 15188009
GCB-DLBCL	DOHH2	PQR309	Panobinostat	HDAC inhibitor	yes	0.81*	0.75-0.84	0-1000 (1:2)	0-3.7 (1:2)	1316.76	1	PMID 23291630	1	PMID 1849602	1	assessed by FISH	1		0	PMID 15188009
GCB-DLBCL	DOHH2	PQR309	Rituximab	anti-CD20 mAb	yes	0.89*	0.81-0.92	0-1000 (1:2)	0-75 (1:2) mcg/ml	1316.76	1	PMID 23291630	1	PMID 1849602	1	assessed by FISH	1		0	PMID 15188009
GCB-DLBCL	DOHH2	PQR309	Venetoclax	Bcl2 inhibitor	yes	0.59*	0.41-0.68	0-1000 (1:2)	0-500 (1:2)	1316.76	1	PMID 23291630	1	PMID 1849602	1	assessed by FISH	1		0	PMID 15188009
GCB-DLBCL	FARAGE	PQR309								190.222			0	PMID 9172815	0	assessed by FISH			1	PMID 23292937
ALCL	FE-PD	PQR309								913.921							0	PMID 25359993
MCL	GRANTA519	PQR309								150	1	PMID 15350304	0	DSMZ ACC-342, PMID 15350304	0	PMID 12127550	1	PMID 26517511	1	PMID 12127550
ABC-DLBCL	HBL1	PQR309	Ibrutinib	BTK inhibitor	yes	0.26*	0.22-0.29	0-2000 (1:2)	0-10000 (1:2)	102.289	1	PMID 23291630; PMID 23257783			0	assessed by FISH	1	PMID 25009295
MCL	JEKO1	PQR309	Ibrutinib	BTK inhibitor	yes	0.53*	0.47-0.64	0-2000 (1:2)	0-10000 (1:2)	223.083			0	DSMZ ACC-553	0	PMID 26517511	1	PMID 26517511, PMID 12127550	1	PMID 16448697
MCL	JEKO1	PQR309	Venetoclax	Bcl2 inhibitor	yes	0.82*	0.75-1.01	0-5000 (1:2)	0-10000 (1:4)	223.083			0	DSMZ ACC-553	0	PMID 26517511	1	PMID 26517511, PMID 12127550	1	PMID 16448697
MCL	JVM2	PQR309								316.343			0	DSMZ ACC-12	0	PMID 26517511	1	PMID 26517511, PMID 12127550	0	PMID 15188009
SMZL	KARPAS1718	PQR309								303.841									1	PMID 22816737
ALCL	KARPAS299	PQR309								180.676									1	PMID 15188009
GCB-DLBCL	KARPAS422	PQR309	ARV-825	PROTAC BET inhibitor	no	0.68*	0.56-0.81	0-2000 (1:2)	0-50 (1:2)	260.555	1	PMID 23291630; PMID 23257783; PMID 17692808	1	PMID 2297573, PMID 8274734	0	assessed by FISH			1	PMID 15188009, PMID 8274734
GCB-DLBCL	KARPAS422	PQR309	AZD1208	PIM inhibitor	no	0.86*	0.8-0.92	0-5000 (1:2)	0-20000 (1:2)	260.555	1	PMID 23291630; PMID 23257783; PMID 17692808	1	PMID 2297573, PMID 8274734	0	assessed by FISH			1	PMID 15188009, PMID 8274734
GCB-DLBCL	KARPAS422	PQR309	metformin	anti-diabetic	yes	1.05^	0.93-1.11	0-2000 (1:2)	0-60000000 (1:2)	260.555	1	PMID 23291630; PMID 23257783; PMID 17692808	1	PMID 2297573, PMID 8274734	0	assessed by FISH			1	PMID 15188009, PMID 8274734
GCB-DLBCL	KARPAS422	PQR309	Panobinostat	HDAC inhibitor	yes	0.18*	0.15-0.28	0-20000 (1:2)	0-12.5 (1:2)	260.555	1	PMID 23291630; PMID 23257783; PMID 17692808	1	PMID 2297573, PMID 8274734	0	assessed by FISH			1	PMID 15188009, PMID 8274734
GCB-DLBCL	KARPAS422	PQR309	Rituximab	anti-CD20 mAb	yes	>3	>3->3	0-20000 (1:2)	0-300 (1:2) mcg/ml	260.555	1	PMID 23291630; PMID 23257783; PMID 17692808	1	PMID 2297573, PMID 8274734	0	assessed by FISH			1	PMID 15188009, PMID 8274734
GCB-DLBCL	KARPAS422	PQR309	Venetoclax	Bcl2 inhibitor	yes	0.14*	0.04-0.27	0-1250 (1:2)	0-500 (1:2)	260.555	1	PMID 23291630; PMID 23257783; PMID 17692808	1	PMID 2297573, PMID 8274734	0	assessed by FISH			1	PMID 15188009, PMID 8274734
ALCL	KIJK	PQR309								262.753
HL	KM-H2	PQR309								2000
HL	L-1236	PQR309								1000
HL	L428	PQR309								>5000
ALCL	L82	PQR309								341.972							1	PMID 11908723	1	PMID 11908723
MCL	MAVER1	PQR309								553.95							1	PMID 26517511	1	PMID 16434369
CLL	MEC1	PQR309								244.361									1	PMID 22460905
MCL	MINO	PQR309								248.552									1	PMID 12127561
GCB-DLBCL	OCI-LY-1	PQR309	AZD1208	PIM inhibitor	no	0.32*	0.27-0.42	0-10000 (1:2)	0-25000 (1:2)	51.9696	1	PMID 23291630; PMID 23257783	1	PMID 8274734, PMID 8574164, PMID 22689920	0	assessed by FISH	1	PMID 11807979	1	PMID 8574164
ABC-DLBCL	OCI-LY-10	PQR309	AZD1208	PIM inhibitor	no	0.51*	0.47-0.57	0-5000 (1:2)	0-20000 (1:2)	131.224	1	PMID 24893165	0	PMID 23370596, PMID 8574164	0	assessed by FISH	0	PMID 25009295	1	PMID 22460905
ABC-DLBCL	OCI-LY-10	PQR309	Ibrutinib	BTK inhibitor	yes	0.67*	0.43-0.75	0-2000 (1:2)	0-10000 (1:2)	131.224	1	PMID 24893165	0	PMID 23370596, PMID 8574164	0	assessed by FISH	0	PMID 25009295	1	PMID 22460905
GCB-DLBCL	OCI-LY-18	PQR309	ARV-825	PROTAC BET inhibitor	no	0.78*	0.71-1.04	0-2000 (1:2)	0-50 (1:2)	88.2265	1	PMID 23291630	1	PMID 8574164	1	assessed by FISH	1	PMID 25009295, PMID 8574164	1	PMID 8574164
GCB-DLBCL	OCI-LY-18	PQR309	AZD1208	PIM inhibitor	no	0.54*	0.46-0.66	0-5000 (1:2)	0-20000 (1:2)	88.2265	1	PMID 23291630	1	PMID 8574164	1	assessed by FISH	1	PMID 25009295, PMID 8574164	1	PMID 8574164
GCB-DLBCL	OCI-LY-18	PQR309	metformin	anti-diabetic	yes	0.79*	0.63-0.96	0-2000 (1:2)	0-60000000 (1:2)	88.2265	1	PMID 23291630	1	PMID 8574164	1	assessed by FISH	1	PMID 25009295, PMID 8574164	1	PMID 8574164
GCB-DLBCL	OCI-LY-18	PQR309	Venetoclax	Bcl2 inhibitor	yes	1.31	1.18-1.56	0-2000 (1:2)	0-30 (1:2)	88.2265	1	PMID 23291630	1	PMID 8574164	1	assessed by FISH	1	PMID 25009295, PMID 8574164	1	PMID 8574164
GCB-DLBCL	OCI-LY-19	PQR309								380.838	1	PMID 23291630	1	DSMZ ACC-528, PMID 23291630	1?	DSMZ ACC-528	1	PMID 8574164	0	PMID 8574164, PMID 28659443
GCB-DLBCL	OCI-LY-2	PQR309								127.421	1	PMID 23291630, PMID 23257783	1	PMID 23291630, PMID 11807979			0	PMID 8574164	1	PMID 8574164, PMID 8274734
ABC-DLBCL	OCI-LY-3	PQR309	ARV-825	PROTAC BET inhibitor	no	1.29	1.02-1.39	0-2000 (1:2)	0-50 (1:2)	136.137	1	PMID 23291630, PMID 23257783	0	assessed by FISH	0	assessed by FISH	0	PMID 8574164	0	PMID 8574164, PMID 19021061
ABC-DLBCL	OCI-LY-3	PQR309	AZD1208	PIM inhibitor	no	0.52*	0.49-0.66	0-5000 (1:2)	0-20000 (1:2)	136.137	1	PMID 23291630, PMID 23257783	0	assessed by FISH	0	assessed by FISH	0	PMID 8574164	0	PMID 8574164, PMID 19021061
ABC-DLBCL	OCI-LY-3	PQR309	Ibrutinib	BTK inhibitor	yes	0.68*	0.6-0.73	0-2000 (1:2)	0-10000 (1:2)	136.137	1	PMID 23291630, PMID 23257783	0	assessed by FISH	0	assessed by FISH	0	PMID 8574164	0	PMID 8574164, PMID 19021061
ABC-DLBCL	OCI-LY-3	PQR309	marizomib	proteasome inhibitor	yes	0.71*	0.67-0.80	0-2000 (1:2)	0-20000 (1:2)	136.137	1	PMID 23291630, PMID 23257783	0	assessed by FISH	0	assessed by FISH	0	PMID 8574164	0	PMID 8574164, PMID 19021061
ABC-DLBCL	OCI-LY-3	PQR309	metformin	anti-diabetic	yes	0.78*	0.65-0.89	0-2000 (1:2)	0-60000000 (1:2)	136.137	1	PMID 23291630, PMID 23257783	0	assessed by FISH	0	assessed by FISH	0	PMID 8574164	0	PMID 8574164, PMID 19021061
GCB-DLBCL	OCI-LY-7	PQR309								128.723	0	PMID 23291630, PMID 23257783, PMID 17692808	0	DSMZ ACC-688, PMID 23291630	1	assessed by FISH	1	PMID 8574164	1	PMID 8574164, PMID 8274734
GCB-DLBCL	OCI-LY-8	PQR309								241.921	1	PMID 23291630	1	PMID 23291630 , PMID 8574164, PMID 22689920	1	assessed by FISH	1	PMID 8574164	1	PMID 8574164
CLL	PCL-12	PQR309								600
GCB-DLBCL	RCK8	PQR309								452.704					0	assessed by FISH			0	PMID 27003102
MCL	REC-1	PQR309	Ibrutinib	BTK inhibitor	yes	0.6*	0.37-0.69	0-2000 (1:2)	0-10 (1:2)	163.875									1	PMID 22460905
MCL	REC-1	PQR309	Venetoclax	Bcl2 inhibitor	yes	0.49*	0.35-0.78	0-5000 (1:2)	0-10000 (1:4)	163.875									1	PMID 22460905
ABC-DLBCL	RI-1	PQR309	ARV-825	PROTAC BET inhibitor	no	0.61*	0.51-0.66	0-2000 (1:2)	0-50 (1:2)	49.6262	1	DSMZ ACC-585			1	DSMZ ACC-585			1	PMID 22460905
ABC-DLBCL	RI-1	PQR309	AZD1208	PIM inhibitor	no	0.2*	0.16-0.22	0-5000 (1:2)	0-20000 (1:2)	49.6262	1	DSMZ ACC-585			1	DSMZ ACC-585			1	PMID 22460905
ABC-DLBCL	RI-1	PQR309	Ibrutinib	BTK inhibitor	yes	0.42*	0.37-.5	0-2000 (1:2)	0-12500 (1:2)	49.6262	1	DSMZ ACC-585			1	DSMZ ACC-585			1	PMID 22460905
ABC-DLBCL	RI-1	PQR309	Lenalidomide	immunomodulator	yes	0.38*	0.11-1.89	0-2000 (1:2)	0-100000 (1:2)	49.6262	1	DSMZ ACC-585			1	DSMZ ACC-585			1	PMID 22460905
ABC-DLBCL	RI-1	PQR309	marizomib	proteasome inhibitor	yes	>3		0-2000 (1:2)	0-20000 (1:2)	49.6262	1	DSMZ ACC-585			1	DSMZ ACC-585			1	PMID 22460905
ABC-DLBCL	RI-1	PQR309	metformin	anti-diabetic	yes	0.74*	0.62-0.84	0-2000 (1:2)	0-60000000 (1:2)	49.6262	1	DSMZ ACC-585			1	DSMZ ACC-585			1	PMID 22460905
ABC-DLBCL	RI-1	PQR309	Venetoclax	Bcl2 inhibitor	yes	0.84*	0.66-0.93	0-1250 (1:2)	0-500 (1:2)	49.6262	1	DSMZ ACC-585			1	DSMZ ACC-585			1	PMID 22460905
MCL	SP-49	PQR309	Ibrutinib	BTK inhibitor	yes	0.68*	0.55-0.81	0-2000 (1:2)	0-10 (1:2)	366.32
MCL	SP-49	PQR309	Venetoclax	Bcl2 inhibitor	yes	0.8*	0.67-0.93	0-5000 (1:2)	0-10000 (1:4)	366.32
MCL	SP53	PQR309								24.6579
SMZL	SSK41	PQR309								213.852
ALCL	SU-DHL-1	PQR309								1242.11									1	PMID 15188009
GCB-DLBCL	SU-DHL-10	PQR309	AZD1208	PIM inhibitor	no	0.61*	0.57-0.67	0-10000 (1:2)	0-25000 (1:2)	609.192	0	PMID 23291630, PMID 23257783	1	assessed by FISH	1	assessed by FISH			1	PMID 22460905
ABC-DLBCL	SU-DHL-2	PQR309	AZD1208	PIM inhibitor	no	0.75*	0.67-1.08	0-10000 (1:2)	0-100000 (1:2)	708.767	0	PMID 23291630	0	PMID 23291630	0	assessed by FISH
ABC-DLBCL	SU-DHL-2	PQR309	Ibrutinib	BTK inhibitor	yes	1.46	1.35-1.64	0-20000 (1:2)	0-25000 (1:2)	708.767	0	PMID 23291630	0	PMID 23291630	0	assessed by FISH
ABC-DLBCL	SU-DHL-2	PQR309	Lenalidomide	immunomodulator	yes	1.2	0.94-1.42	0-20000 (1:2)	0-100000 (1:2)	708.767	0	PMID 23291630	0	PMID 23291630	0	assessed by FISH
ABC-DLBCL	SU-DHL-2	PQR309	Panobinostat	HDAC inhibitor	yes	1.04^	0.76-1.12	0-20000 (1:2)	0-2.5 (1:2)	708.767	0	PMID 23291630	0	PMID 23291630	0	assessed by FISH
ABC-DLBCL	SU-DHL-2	PQR309	Venetoclax	Bcl2 inhibitor	yes	1.1	0.99-1.23	0-10000 (1:2)	0-25000 (1:2)	708.767	0	PMID 23291630	0	PMID 23291630	0	assessed by FISH
GCB-DLBCL	SU-DHL-4	PQR309								101.462	1	PMID 23291630, PMID 8274734, PMID 17692808	1	PMID 23291630	0	assessed by FISH	1	PMID 25009295	1	PMID 22460905
GCB-DLBCL	SU-DHL-6	PQR309	ARV-825	PROTAC BET inhibitor	no	0.71*	0.65-0.88	0-2000 (1:2)	0-50 (1:2)	166.462	1	PMID 23291630	1	PMID 20350212, PMID 23291630, PMID 14671650, DSMZ ACC 572	0	assessed by FISH			1	PMID 22460905, PMID 8274734
GCB-DLBCL	SU-DHL-6	PQR309	AZD1208	PIM inhibitor	no	0.93^	0.84-1.03	0-5000 (1:2)	0-20000 (1:2)	166.462	1	PMID 23291630	1	PMID 20350212, PMID 23291630, PMID 14671650, DSMZ ACC 572	0	assessed by FISH			1	PMID 22460905, PMID 8274734
GCB-DLBCL	SU-DHL-6	PQR309	metformin	anti-diabetic	yes	0.77*	0.63-0.93	0-2000 (1:2)	0-15000000 (1:2)	166.462	1	PMID 23291630	1	PMID 20350212, PMID 23291630, PMID 14671650, DSMZ ACC 572	0	assessed by FISH			1	PMID 22460905, PMID 8274734
GCB-DLBCL	SU-DHL-6	PQR309	Panobinostat	HDAC inhibitor	yes	0.7*	0.62-0.74	0-10000 (1:2)	0-20 (1:2)	166.462	1	PMID 23291630	1	PMID 20350212, PMID 23291630, PMID 14671650, DSMZ ACC 572	0	assessed by FISH			1	PMID 22460905, PMID 8274734
GCB-DLBCL	SU-DHL-6	PQR309	Rituximab	anti-CD20 mAb	yes	>3	>3->3	0-10000 (1:2)	0-75 (1:2) mcg/ml	166.462	1	PMID 23291630	1	PMID 20350212, PMID 23291630, PMID 14671650, DSMZ ACC 572	0	assessed by FISH			1	PMID 22460905, PMID 8274734
GCB-DLBCL	SU-DHL-6	PQR309	Venetoclax	Bcl2 inhibitor	yes	0.15*	0.03-0.3	0-1250 (1:2)	0-10000 (1:2)	166.462	1	PMID 23291630	1	PMID 20350212, PMID 23291630, PMID 14671650, DSMZ ACC 572	0	assessed by FISH			1	PMID 22460905, PMID 8274734
GCB-DLBCL	SU-DHL-7	PQR309								164.94
ABC-DLBCL	TMD8	PQR309	ARV-825	PROTAC BET inhibitor	no	1.35	1.33-1.4	0-2000 (1:2)	0-50 (1:2)	18.0304	1	PMID 24893165, PMID 23257783			0	assessed by FISH			0	PMID 22791293, PMID 16780947
ABC-DLBCL	TMD8	PQR309	AZD1208	PIM inhibitor	no	0.84*	0.71-1.07	0-500 (1:2)	0-25000 (1:2)	18.0304	1	PMID 24893165, PMID 23257783			0	assessed by FISH			0	PMID 22791293, PMID 16780947
ABC-DLBCL	TMD8	PQR309	Ibrutinib	BTK inhibitor	yes	0.56*	0.45-0.63	0-500 (1:2)	0-20000 (1:2)	18.0304	1	PMID 24893165, PMID 23257783			0	assessed by FISH			0	PMID 22791293, PMID 16780947
ABC-DLBCL	TMD8	PQR309	Lenalidomide	immunomodulator	yes	0.53*	0.35-0.67	0-500 (1:2)	0-5000 (1:2)	18.0304	1	PMID 24893165, PMID 23257783			0	assessed by FISH			0	PMID 22791293, PMID 16780947
ABC-DLBCL	TMD8	PQR309	marizomib	proteasome inhibitor	yes	0.98^	0.95-1.12	0-2000 (1:2)	0-20000 (1:2)	18.0304	1	PMID 24893165, PMID 23257783			0	assessed by FISH			0	PMID 22791293, PMID 16780947
ABC-DLBCL	TMD8	PQR309	metformin	anti-diabetic	yes	0.96^	0.82-1.02	0-2000 (1:2)	0-60000000 (1:2)	18.0304	1	PMID 24893165, PMID 23257783			0	assessed by FISH			0	PMID 22791293, PMID 16780947
ABC-DLBCL	TMD8	PQR309	Panobinostat	HDAC inhibitor	yes	1.16	1.13-1.19	0-500 (1:2)	0-5 (1:2)	18.0304	1	PMID 24893165, PMID 23257783			0	assessed by FISH			0	PMID 22791293, PMID 16780947
ABC-DLBCL	TMD8	PQR309	Rituximab	anti-CD20 mAb	yes	0.66*	0.57-1.13	0-500 (1:2)	0-40 (1:2) mcg/ml	18.0304	1	PMID 24893165, PMID 23257783			0	assessed by FISH			0	PMID 22791293, PMID 16780947
ABC-DLBCL	TMD8	PQR309	Venetoclax	Bcl2 inhibitor	yes	0.51*	0.34-0.7	0-500 (1:2)	0-10000 (1:2)	18.0304	1	PMID 24893165, PMID 23257783			0	assessed by FISH			0	PMID 22791293, PMID 16780947
GCB-DLBCL	TOLEDO	PQR309								832.049			1	PMID 24887414, PMID 22689920	1	assessed by FISH			1	PMID 22460905
ABC-DLBCL	U2932	PQR309	ARV-825	PROTAC BET inhibitor	no	0.98^	0.9-1.14	0-2000 (1:2)	0-50 (1:2)	582.247	1	PMID 23291630, PMID 23257783, PMID 12533045	0	DSMZ ACC-633	0	assessed by FISH			1	PMID 12533045
ABC-DLBCL	U2932	PQR309	AZD1208	PIM inhibitor	no	0.37*	0.34-0.44	0-5000 (1:2)	0-20000 (1:2)	582.247	1	PMID 23291630, PMID 23257783, PMID 12533045	0	DSMZ ACC-633	0	assessed by FISH			1	PMID 12533045
ABC-DLBCL	U2932	PQR309	Ibrutinib	BTK inhibitor	yes	0.49*	0.44-0.7	0-10000 (1:2)	0-12500 (1:2)	582.247	1	PMID 23291630, PMID 23257783, PMID 12533045	0	DSMZ ACC-633	0	assessed by FISH			1	PMID 12533045
ABC-DLBCL	U2932	PQR309	Lenalidomide	immunomodulator	yes	0.51*	0.45-0.62	0-10000 (1:2)	0-10000 (1:2)	582.247	1	PMID 23291630, PMID 23257783, PMID 12533045	0	DSMZ ACC-633	0	assessed by FISH			1	PMID 12533045
ABC-DLBCL	U2932	PQR309	marizomib	proteasome inhibitor	yes	1.3	1.12-1.55	0-2000 (1:2)	0-20000 (1:2)	582.247	1	PMID 23291630, PMID 23257783, PMID 12533045	0	DSMZ ACC-633	0	assessed by FISH			1	PMID 12533045
ABC-DLBCL	U2932	PQR309	metformin	anti-diabetic	yes	0.8*	0.71-0.93	0-2000 (1:2)	0-60000000 (1:2)	582.247	1	PMID 23291630, PMID 23257783, PMID 12533045	0	DSMZ ACC-633	0	assessed by FISH			1	PMID 12533045
ABC-DLBCL	U2932	PQR309	Panobinostat	HDAC inhibitor	yes	0.6*	0.5-0.69	0-10000 (1:2)	0-50 (1:2)	582.247	1	PMID 23291630, PMID 23257783, PMID 12533045	0	DSMZ ACC-633	0	assessed by FISH			1	PMID 12533045
ABC-DLBCL	U2932	PQR309	Rituximab	anti-CD20 mAb	yes	>3	>3->3	0-10000 (1:2)	0-75 (1:2) mcg/ml	582.247	1	PMID 23291630, PMID 23257783, PMID 12533045	0	DSMZ ACC-633	0	assessed by FISH			1	PMID 12533045
ABC-DLBCL	U2932	PQR309	Venetoclax	Bcl2 inhibitor	yes	0.03*	0.003-0.16	0-10000 (1:2)	0-5000 (1:2)	582.247	1	PMID 23291630, PMID 23257783, PMID 12533045	0	DSMZ ACC-633	0	assessed by FISH			1	PMID 12533045
MCL	UPN-1	PQR309	Ibrutinib	BTK inhibitor	yes	0.69*	0.64-0.75	0-2000 (1:2)	0-10000 (1:2)	192.55									1	PMID 17332242
MCL	UPN-1	PQR309	Venetoclax	Bcl2 inhibitor	yes	>3		0-5000 (1:2)	0-10000 (1:4)	192.55									1	PMID 17332242
GCB-DLBCL	VAL	PQR309								177.055			1	DSMZ ACC-586	1	assessed by FISH			0	PMID 28659443
SMZL	VL51	PQR309								187.974
GCB-DLBCL	WSU-DLCL2	PQR309								352.55			1	DSMZ ACC-575	0	assessed by FISH			1	PMID 28659443
MCL	Z138	PQR309								387.25					1	PMID 26517511
