# Supplementary material for: PQR309 Is a Novel Dual PI3K/mTOR Inhibitor with Preclinical Antitumor Activity in Lymphomas as a Single Agent and in Combination Therapy
Source: Oxford University Press journal article supplement (doi:10.1158/1078-0432.ccr-17-1041), 2017-10-24
Supplement: 10780432ccr171041-sup-181771_2_supp_4322363_7xm7fc.xlsx [file 10780432ccr171041-sup-181771_2_supp_4322363_7xm7fc.xlsx]

## Sheet: Sheet1
Table S4A
NAME	NES	NOM p-val	FDR q-val
BLOOD_MODULE-3.1_INTERFERON_INDUCIBLE	2.76742	0	0
HALLMARK_INTERFERON_ALPHA_RESPONSE	2.73461	0	0
IFN_PMBC_4X_UP	2.72162	0	0
HALLMARK_INTERFERON_GAMMA_RESPONSE	2.67227	0	0
IFN_PMBC_2X_UP	2.66845	0	0
REACTOME_INTERFERON_ALPHA_BETA_SIGNALING	2.62363	0	0
HECKER_IFNB1_TARGETS	2.59872	0	0
TAKEDA_TARGETS_OF_NUP98_HOXA9_FUSION_3D_UP	2.59675	0	0
BOSCO_INTERFERON_INDUCED_ANTIVIRAL_MODULE	2.58615	0	0
BROWNE_INTERFERON_RESPONSIVE_GENES	2.57325	0	0
DAUER_STAT3_TARGETS_DN	2.55465	0	0
DER_IFN_ALPHA_RESPONSE_UP	2.51293	0	0
SEITZ_NEOPLASTIC_TRANSFORMATION_BY_8P_DELETION_UP	2.49586	0	0
REACTOME_INTERFERON_SIGNALING	2.46731	0	0
SANA_TNF_SIGNALING_UP	2.45416	0	0
MOSERLE_IFNA_RESPONSE	2.44088	0	0
EINAV_INTERFERON_SIGNATURE_IN_CANCER	2.44045	0	0
SANA_RESPONSE_TO_IFNG_UP	2.41162	0	0
BASSO_CD40_SIGNALING_UP	2.40169	0	0
PMBL_9P24_GT_GCB	2.40137	0	0
CD40_UPREGULATED_BURKITT_LYMPHOMA	2.40045	0	0
JISON_SICKLE_CELL_DISEASE_UP	2.39102	0	0
CHANG_IMMORTALIZED_BY_HPV31_DN	2.38272	0	0
REACTOME_INTERFERON_GAMMA_SIGNALING	2.37014	0	0
WALLACE_PROSTATE_CANCER_RACE_UP	2.36771	0	0
PMBL_GT_GCB	2.35649	0	0
RADAEVA_RESPONSE_TO_IFNA1_UP	2.35633	0	0
KIM_LRRC3B_TARGETS	2.3537	0	0
DER_IFN_BETA_RESPONSE_UP	2.34821	0	0
REACTOME_CYTOKINE_SIGNALING_IN_IMMUNE_SYSTEM	2.3404	0	0
ICHIBA_GRAFT_VERSUS_HOST_DISEASE_D7_UP	2.33269	0	0
BENNETT_SYSTEMIC_LUPUS_ERYTHEMATOSUS	2.32858	0	0
BOWIE_RESPONSE_TO_TAMOXIFEN	2.32016	0	0
LEE_EARLY_T_LYMPHOCYTE_DN	2.29481	0	0
TAKEDA_TARGETS_OF_NUP98_HOXA9_FUSION_8D_UP	2.29385	0	0
HELLER_SILENCED_BY_METHYLATION_UP	2.2894	0	0
KRASNOSELSKAYA_ILF3_TARGETS_UP	2.28754	0	0
ZHANG_INTERFERON_RESPONSE	2.26994	0	0
CC_1P5_UP	2.26765	0	0
CC_1P33_UP	2.2587	0	0
KEGG_CHEMOKINE_SIGNALING_PATHWAY	2.25668	0	0
PMBL_HL_HIGH	2.25327	0	0
DER_IFN_GAMMA_RESPONSE_UP	2.25292	0	0
MYD88_INTERFERON_HBL1	2.25046	0	0
MARKEY_RB1_ACUTE_LOF_DN	2.24894	0	0
TAKEDA_TARGETS_OF_NUP98_HOXA9_FUSION_16D_UP	2.23371	0	0
LYMPH_NODE_DLBCL	2.2294	0	0
GRAESSMANN_RESPONSE_TO_MC_AND_SERUM_DEPRIVATION_UP	2.21519	0	4.31552e-05
ZHU_CMV_8_HR_UP	2.21157	0	4.17631e-05
SPLENIC_MARGINAL_ZONE_BCELL_GT_GC_BCELL	2.20597	0	0
GOLUB_ALL_VS_AML_DN	2.20001	0	4.0458e-05
REACTOME_CHEMOKINE_RECEPTORS_BIND_CHEMOKINES	2.19066	0	0.000224733
WUNDER_INFLAMMATORY_RESPONSE_AND_CHOLESTEROL_UP	2.19	0	3.9232e-05
THYMIC_SP_CD4+TCELL_GT_THYMIC_DP_TCELL	2.18785	0	0
CASTELLANO_NRAS_TARGETS_UP	2.18408	0	3.80781e-05
MISSIAGLIA_REGULATED_BY_METHYLATION_UP	2.18014	0	3.69902e-05
LIAN_LIPA_TARGETS_3M	2.17082	0	3.59627e-05
NEWMAN_ERCC6_TARGETS_UP	2.17048	0	3.49907e-05
PID_IL12_2PATHWAY	2.16996	0	0.000388203
WIELAND_UP_BY_HBV_INFECTION	2.16842	0	3.40699e-05
ALTEMEIER_RESPONSE_TO_LPS_WITH_MECHANICAL_VENTILATION	2.16129	0	3.31963e-05
NFKB_UP_OCILY10_ONLY	2.14787	0	0
LIAN_LIPA_TARGETS_6M	2.1477	0	9.57481e-05
LIANG_SILENCED_BY_METHYLATION_2	2.1468	0	9.34128e-05
SPLENIC_MARGINAL_ZONE_BCELL_GT_NAIVE_AND_GC_BCELL	2.1441	0	0
BOWIE_RESPONSE_TO_EXTRACELLULAR_MATRIX	2.14369	0	9.11887e-05
JAK2_PMBL_GT_GCB	2.14134	0	0
UROSEVIC_RESPONSE_TO_IMIQUIMOD	2.13677	0	8.9068e-05
REACTOME_ER_PHAGOSOME_PATHWAY	2.13313	0	0.000500649
DIRMEIER_LMP1_RESPONSE_LATE_UP	2.12945	0	0.000117371
XU_AKT1_TARGETS_6HR	2.11653	0	0.000142252
ZHANG_RESPONSE_TO_IKK_INHIBITOR_AND_TNF_UP	2.11471	0	0.00013916
KERLEY_RESPONSE_TO_CISPLATIN_UP	2.11124	0	0.000136199
SHIPP_DLBCL_VS_FOLLICULAR_LYMPHOMA_DN	2.1015	0	0.000159342
JOHNSTONE_PARVB_TARGETS_2_UP	2.09631	0	0.000182312
HEMATOPOIETIC_NODE1658	2.09447	0	0
CROONQUIST_NRAS_SIGNALING_UP	2.09401	0	0.000204382
XU_HGF_TARGETS_INDUCED_BY_AKT1_6HR	2.0915	0	0.000200374
JACKSON_DNMT1_TARGETS_UP	2.08701	0	0.000220345
HALLMARK_INFLAMMATORY_RESPONSE	2.08508	0	0
FUJII_YBX1_TARGETS_UP	2.08373	0	0.000216188
REN_ALVEOLAR_RHABDOMYOSARCOMA_UP	2.08288	0	0.000212184
BCL6_REPRESSED	2.08128	0	0
HALLMARK_TNFA_SIGNALING_VIA_NFKB	2.0801	0	0
ZHU_CMV_ALL_UP	2.07923	0	0.000278111
LINDSTEDT_DENDRITIC_CELL_MATURATION_B	2.07884	0	0.000295814
APPEL_IMATINIB_RESPONSE	2.07833	0	0.000290624
VILIMAS_NOTCH1_TARGETS_UP	2.07805	0	0.000285613
ICHIBA_GRAFT_VERSUS_HOST_DISEASE_35D_UP	2.07243	0	0.000280772
QI_PLASMACYTOMA_UP	2.06796	0	0.000276093
MYD88_UP_HBL1	2.06505	0	0
LINDSTEDT_DENDRITIC_CELL_MATURATION_A	2.06334	0	0.000292362
KUROZUMI_RESPONSE_TO_ONCOCYTIC_VIRUS	2.05968	0	0.000349748
FARMER_BREAST_CANCER_CLUSTER_1	2.05946	0	0.000344197
SAGIV_CD24_TARGETS_DN	2.05915	0	0.00035858
DAVIES_MULTIPLE_MYELOMA_VS_MGUS_DN	2.05581	0	0.000353064
REACTOME_IMMUNOREGULATORY_INTERACTIONS_BETWEEN_A_LYMPHOID_AND_A_NON_LYMPHOID_CELL	2.04846	0	0.00178364
HALLMARK_ALLOGRAFT_REJECTION	2.04528	0	0
FLECHNER_BIOPSY_KIDNEY_TRANSPLANT_REJECTED_VS_OK_UP	2.04285	0	0.000443446
SWEET_KRAS_ONCOGENIC_SIGNATURE	2.03966	0	0.000456121
ZHANG_ANTIVIRAL_RESPONSE_TO_RIBAVIRIN_UP	2.03897	0	0.000449413
ONGUSAHA_TP53_TARGETS	2.03677	0	0.0004429
RODWELL_AGING_KIDNEY_UP	2.03524	0	0.000472501
REACTOME_ANTIGEN_PROCESSING_CROSS_PRESENTATION	2.03489	0	0.00227329
STAMBOLSKY_TARGETS_OF_MUTATED_TP53_DN	2.03342	0	0.000501807
NFKB_UP_ALL_OCILY3_LY10	2.03262	0	0
BIOCARTA_NKT_PATHWAY	2.02913	0	0.00231415
ZHANG_TLX_TARGETS_UP	2.02889	0	0.000512696
KEGG_TOLL_LIKE_RECEPTOR_SIGNALING_PATHWAY	2.02562	0	0.0021213
TAKEDA_TARGETS_OF_NUP98_HOXA9_FUSION_10D_UP	2.01896	0	0.000642937
FRIDMAN_SENESCENCE_UP	2.01658	0	0.000634248
WORSCHECH_TUMOR_REJECTION_UP	2.01598	0	0.000642382
RUTELLA_RESPONSE_TO_CSF2RB_AND_IL4_UP	2.01308	0	0.000701377
RUTELLA_RESPONSE_TO_HGF_VS_CSF2RB_AND_IL4_DN	2.01166	0	0.000692268
FULCHER_INFLAMMATORY_RESPONSE_LECTIN_VS_LPS_DN	2.00708	0	0.000782718
KEGG_PROTEASOME	1.99597	0	0.00331863
KEGG_ANTIGEN_PROCESSING_AND_PRESENTATION	1.99436	0	0.00317492
GRANDVAUX_IRF3_TARGETS_UP	1.99057	0	0.00106062
IZADPANAH_STEM_CELL_ADIPOSE_VS_BONE_UP	1.99052	0	0.00104736
MCLACHLAN_DENTAL_CARIES_UP	1.98919	0	0.00106525
LI_INDUCED_T_TO_NATURAL_KILLER_UP	1.98679	0	0.00111496
KLF2_INDUCED	1.9859	0	0.000192803
GALINDO_IMMUNE_RESPONSE_TO_ENTEROTOXIN	1.98539	0	0.00111681
MARSON_FOXP3_TARGETS_UP	1.97958	0	0.00124176
GAJATE_RESPONSE_TO_TRABECTEDIN_UP	1.97896	0	0.00124185
REACTOME_PEPTIDE_LIGAND_BINDING_RECEPTORS	1.97807	0	0.00413767
LEE_AGING_CEREBELLUM_DN	1.97581	0	0.00133161
KEGG_CYTOKINE_CYTOKINE_RECEPTOR_INTERACTION	1.97351	0	0.00396431
TSAI_RESPONSE_TO_IONIZING_RADIATION	1.96804	0	0.00157977
ZUCCHI_METASTASIS_DN	1.95992	0	0.00187741
ROY_WOUND_BLOOD_VESSEL_UP	1.95969	0	0.00185632
BROWN_MYELOID_CELL_DEVELOPMENT_UP	1.9579	0	0.00190555
CHIANG_LIVER_CANCER_SUBCLASS_INTERFERON_UP	1.95521	0	0.00198177
TCELL_CYTOKINE_INDUCED_PMBCONLY_IINDUCED	1.95486	0	0.00063334
REACTOME_REGULATION_OF_IFNA_SIGNALING	1.95477	0	0.00594662
KANNAN_TP53_TARGETS_UP	1.95387	0	0.00205848
RHEIN_ALL_GLUCOCORTICOID_THERAPY_UP	1.95265	0	0.00206354
REACTOME_CLASS_A1_RHODOPSIN_LIKE_RECEPTORS	1.94741	0	0.00653467
KIM_PTEN_TARGETS_UP	1.94603	0	0.00217629
REACTOME_P53_DEPENDENT_G1_DNA_DAMAGE_RESPONSE	1.94458	0	0.00626184
LIANG_SILENCED_BY_METHYLATION_UP	1.94172	0	0.00235416
HOFMANN_CELL_LYMPHOMA_UP	1.94164	0	0.00232963
GAURNIER_PSMD4_TARGETS	1.93978	0	0.00239756
REACTOME_IL_RECEPTOR_SHC_SIGNALING	1.93723	0	0.00655029
NADLER_OBESITY_UP	1.93601	0	0.00250297
ZHU_CMV_24_HR_UP	1.93156	0	0.00276125
REACTOME_SCFSKP2_MEDIATED_DEGRADATION_OF_P27_P21	1.9315	0	0.00681446
FOSTER_KDM1A_TARGETS_UP	1.93013	0	0.00281057
VERHAAK_GLIOBLASTOMA_MESENCHYMAL	1.93008	0	0.00278275
DIRMEIER_LMP1_RESPONSE_EARLY	1.92661	0	0.0029653
REACTOME_VIF_MEDIATED_DEGRADATION_OF_APOBEC3G	1.92647	0	0.00718702
REACTOME_CDK_MEDIATED_PHOSPHORYLATION_AND_REMOVAL_OF_CDC6	1.92572	0	0.0069889
REACTOME_SIGNALING_BY_ILS	1.92509	0	0.00675315
DOUGLAS_BMI1_TARGETS_DN	1.923	0	0.00307176
RUTELLA_RESPONSE_TO_HGF_UP	1.92152	0	0.00315068
DELYS_THYROID_CANCER_UP	1.91401	0	0.00344737
DORN_ADENOVIRUS_INFECTION_12HR_DN	1.91386	0	0.00343919
BIOCARTA_P53HYPOXIA_PATHWAY	1.91334	0	0.00831704
HESS_TARGETS_OF_HOXA9_AND_MEIS1_DN	1.91268	0	0.00343043
YAN_ESCAPE_FROM_ANOIKIS	1.90936	0	0.00358627
REACTOME_DESTABILIZATION_OF_MRNA_BY_AUF1_HNRNP_D0	1.90929	0	0.008571
NFKB_CHIPCHIP_YOUNG_ALL	1.90833	0	0.00171141
CROONQUIST_NRAS_VS_STROMAL_STIMULATION_UP	1.90832	0	0.00358825
MYD88_NFKB_HBL1	1.9055	0	0.0017516
TAKEDA_TARGETS_OF_NUP98_HOXA9_FUSION_6HR_DN	1.90484	0	0.0037292
HALLMARK_P53_PATHWAY	1.90237	0	0.000203704
GUTIERREZ_CHRONIC_LYMPHOCYTIC_LEUKEMIA_DN	1.90195	0	0.00378647
JI_METASTASIS_REPRESSED_BY_STK11	1.90032	0	0.00385459
KEGG_CYTOSOLIC_DNA_SENSING_PATHWAY	1.89727	0	0.0103001
HALLMARK_COMPLEMENT	1.89219	0	0.000174603
REACTOME_ANTIGEN_PRESENTATION_FOLDING_ASSEMBLY_AND_PEPTIDE_LOADING_OF_CLASS_I_MHC	1.88782	0.00208333	0.0120586
CHEN_ETV5_TARGETS_SERTOLI	1.88612	0.00203252	0.00485381
IRF3_TARGET_GENE	1.88318	0	0.00235024
GRAHAM_CML_QUIESCENT_VS_NORMAL_DIVIDING_UP	1.88268	0	0.00511087
ZHU_SKIL_TARGETS_UP	1.88217	0	0.00511085
SENGUPTA_NASOPHARYNGEAL_CARCINOMA_WITH_LMP1_DN	1.88015	0	0.00517616
HOSHIDA_LIVER_CANCER_SUBCLASS_S1	1.87446	0	0.00559886
VARELA_ZMPSTE24_TARGETS_DN	1.87294	0	0.00566905
VALK_AML_CLUSTER_5	1.87115	0	0.00573925
MCL_GT_SLL_DLBCL	1.86955	0	0.00272825
DEBIASI_APOPTOSIS_BY_REOVIRUS_INFECTION_UP	1.86872	0	0.00585029
HENDRICKS_SMARCA4_TARGETS_UP	1.86562	0	0.00613672
POOLA_INVASIVE_BREAST_CANCER_UP	1.86547	0	0.00608642
P53_UP_XRAY	1.86483	0.00406504	0.00284191
KEGG_LYSOSOME	1.86482	0	0.0164567
HALLMARK_PI3K_AKT_MTOR_SIGNALING	1.86288	0	0.000281684
KEGG_AUTOIMMUNE_THYROID_DISEASE	1.86219	0	0.0164941
PID_REG_GR_PATHWAY	1.86213	0	0.0159621
PID_PRL_SIGNALING_EVENTS_PATHWAY	1.86111	0	0.0158846
REACTOME_CROSS_PRESENTATION_OF_SOLUBLE_EXOGENOUS_ANTIGENS_ENDOSOMES	1.85976	0.002079	0.0157281
PROVENZANI_METASTASIS_DN	1.85945	0	0.00663507
JOHNSTONE_PARVB_TARGETS_3_UP	1.85789	0	0.00675355
BASSO_B_LYMPHOCYTE_NETWORK	1.85675	0	0.00682246
RASHI_RESPONSE_TO_IONIZING_RADIATION_6	1.85566	0	0.00688849
LOPES_METHYLATED_IN_COLON_CANCER_UP	1.85459	0	0.00698448
BLOOD_MODULE-1.5_MYELOID_LINEAGE-1	1.85311	0	0.00326935
XU_RESPONSE_TO_TRETINOIN_AND_NSC682994_UP	1.85157	0	0.00720797
RICKMAN_METASTASIS_DN	1.85105	0	0.00721034
ZHANG_TLX_TARGETS_60HR_UP	1.85101	0	0.00715488
KEGG_CELL_ADHESION_MOLECULES_CAMS	1.85059	0	0.0174406
KEGG_OXIDATIVE_PHOSPHORYLATION	1.84671	0	0.0180687
SMIRNOV_RESPONSE_TO_IR_6HR_UP	1.8466	0	0.00745831
MISHRA_CARCINOMA_ASSOCIATED_FIBROBLAST_UP	1.84556	0.002079	0.00750713
GAVIN_FOXP3_TARGETS_CLUSTER_P2	1.84529	0	0.00749939
BLOOD_MODULE-2.1_CYTOTOXIC_CELLS	1.84471	0	0.0033374
TCELL_PIIND4X_FESKE_FIG4	1.84467	0	0.00322615
BERTUCCI_MEDULLARY_VS_DUCTAL_BREAST_CANCER_UP	1.84225	0	0.00786834
NOJIMA_SFRP2_TARGETS_DN	1.84078	0	0.00800637
SEKI_INFLAMMATORY_RESPONSE_LPS_UP	1.84053	0	0.00796624
PEDERSEN_METASTASIS_BY_ERBB2_ISOFORM_3	1.83967	0.00390625	0.00800931
KEGG_ABC_TRANSPORTERS	1.8389	0	0.0197718
REACTOME_ANTIVIRAL_MECHANISM_BY_IFN_STIMULATED_GENES	1.838	0	0.0194522
BOYAULT_LIVER_CANCER_SUBCLASS_G5_DN	1.83587	0	0.00852848
TONKS_TARGETS_OF_RUNX1_RUNX1T1_FUSION_GRANULOCYTE_DN	1.83474	0.004	0.00864898
PAPASPYRIDONOS_UNSTABLE_ATEROSCLEROTIC_PLAQUE_UP	1.83433	0	0.00865044
REACTOME_RESPIRATORY_ELECTRON_TRANSPORT	1.82532	0.00389864	0.0223399
HAHTOLA_MYCOSIS_FUNGOIDES_DN	1.82433	0.00194175	0.00988896
REACTOME_REGULATION_OF_ORNITHINE_DECARBOXYLASE_ODC	1.82317	0.00204918	0.0223605
OUYANG_PROSTATE_CANCER_PROGRESSION_UP	1.82307	0.0019305	0.0100158
YAO_TEMPORAL_RESPONSE_TO_PROGESTERONE_CLUSTER_9	1.82294	0	0.00995452
ZHAN_MULTIPLE_MYELOMA_HP_DN	1.82112	0	0.0101837
KEGG_ENDOCYTOSIS	1.82072	0	0.0223395
LI_LUNG_CANCER	1.82052	0.00199203	0.0101832
WARTERS_IR_RESPONSE_5GY	1.82048	0.00401606	0.0101221
BURTON_ADIPOGENESIS_7	1.81981	0.00197239	0.0101737
HANN_RESISTANCE_TO_BCL2_INHIBITOR_UP	1.81973	0.00200803	0.0101134
HUANG_GATA2_TARGETS_UP	1.81655	0	0.0105315
REACTOME_RIG_I_MDA5_MEDIATED_INDUCTION_OF_IFN_ALPHA_BETA_PATHWAYS	1.81603	0	0.0232164
REACTOME_NEGATIVE_REGULATORS_OF_RIG_I_MDA5_SIGNALING	1.81511	0.00398406	0.0228274
MARTINEZ_RESPONSE_TO_TRABECTEDIN_UP	1.81364	0	0.0109093
GRUETZMANN_PANCREATIC_CANCER_UP	1.81355	0	0.0108454
KEGG_VIRAL_MYOCARDITIS	1.81253	0	0.022863
WIERENGA_STAT5A_TARGETS_GROUP2	1.8115	0	0.0111399
REACTOME_SCF_BETA_TRCP_MEDIATED_DEGRADATION_OF_EMI1	1.81105	0.00205339	0.0229216
REACTOME_ACTIVATION_OF_NF_KAPPAB_IN_B_CELLS	1.81051	0	0.0226515
HEIDENBLAD_AMPLICON_8Q24_DN	1.80903	0	0.0115223
SUZUKI_RESPONSE_TO_TSA_AND_DECITABINE_1A	1.80894	0.00208768	0.0114799
NFKB_UP_BOTHOCILY3ANDLY10	1.80823	0	0.00501152
HALLMARK_OXIDATIVE_PHOSPHORYLATION	1.80713	0	0.00125051
WU_CELL_MIGRATION	1.80573	0	0.0118873
PELLICCIOTTA_HDAC_IN_ANTIGEN_PRESENTATION_DN	1.80485	0	0.011958
GUTIERREZ_MULTIPLE_MYELOMA_UP	1.80372	0.00209644	0.0119799
LEI_MYB_TARGETS	1.80205	0	0.0121692
MYELOMA_HY_SUBGROUP_DOWN	1.80044	0	0.00505594
ODONNELL_TARGETS_OF_MYC_AND_TFRC_UP	1.80037	0.00201613	0.012387
ZHANG_TLX_TARGETS_36HR_UP	1.79969	0	0.0124208
REACTOME_AUTODEGRADATION_OF_THE_E3_UBIQUITIN_LIGASE_COP1	1.79952	0.002079	0.0263029
KIM_RESPONSE_TO_TSA_AND_DECITABINE_UP	1.79784	0	0.0125563
MARKEY_RB1_CHRONIC_LOF_DN	1.79733	0	0.012588
VERHAAK_AML_WITH_NPM1_MUTATED_UP	1.79696	0	0.0125342
RASHI_NFKB1_TARGETS	1.79628	0.00877193	0.0125582
IL6_LY10_UP_ALL	1.7954	0.00203252	0.0052416
SCHAVOLT_TARGETS_OF_TP53_AND_TP63	1.79514	0.00400802	0.0127045
MIKKELSEN_MCV6_LCP_WITH_H3K4ME3	1.7902	0	0.0133848
MORI_PRE_BI_LYMPHOCYTE_DN	1.78964	0	0.0134103
BURTON_ADIPOGENESIS_8	1.78853	0	0.0135564
NFKB_UP_BCR_PAPER	1.78791	0	0.00569093
FRASOR_RESPONSE_TO_ESTRADIOL_DN	1.78605	0	0.0139031
REACTOME_IL_3_5_AND_GM_CSF_SIGNALING	1.78604	0	0.0304536
KEGG_FC_GAMMA_R_MEDIATED_PHAGOCYTOSIS	1.78591	0.00199601	0.0298191
REACTOME_CYCLIN_E_ASSOCIATED_EVENTS_DURING_G1_S_TRANSITION_	1.78535	0	0.0294017
WATANABE_COLON_CANCER_MSI_VS_MSS_UP	1.78499	0.0059761	0.0140232
SATO_SILENCED_BY_DEACETYLATION_IN_PANCREATIC_CANCER	1.78474	0.00199203	0.0139635
GAVIN_FOXP3_TARGETS_CLUSTER_T7	1.78211	0	0.0144125
KEGG_ALLOGRAFT_REJECTION	1.7814	0.00204499	0.0304145
HALLMARK_APOPTOSIS	1.78123	0	0.0014608
HERNANDEZ_ABERRANT_MITOSIS_BY_DOCETACEL_2NM_DN	1.7808	0.00424628	0.0146004
MOOTHA_VOXPHOS	1.77904	0	0.0148085
DIRMEIER_LMP1_RESPONSE_LATE_DN	1.77798	0.00392927	0.0148833
PID_ERBB2_ERBB3_PATHWAY	1.77722	0.00196464	0.0313538
MYC_CHIP_PET_EXPR_DOWN	1.77455	0	0.0067334
JAATINEN_HEMATOPOIETIC_STEM_CELL_DN	1.77441	0	0.0156054
REACTOME_RESPIRATORY_ELECTRON_TRANSPORT_ATP_SYNTHESIS_BY_CHEMIOSMOTIC_COUPLING_AND_HEAT_PRODUCTION_BY_UNCOUPLING_PROTEINS_	1.77428	0	0.0318926
NOJIMA_SFRP2_TARGETS_UP	1.77402	0.00402414	0.0156182
BOSCO_TH1_CYTOTOXIC_MODULE	1.77386	0	0.0155446
WARTERS_RESPONSE_TO_IR_SKIN	1.77325	0	0.0155705
PID_INTEGRIN2_PATHWAY	1.77279	0.00205339	0.0319802
NAKAYAMA_SOFT_TISSUE_TUMORS_PCA1_UP	1.77259	0.00201613	0.0156622
ZHAN_V1_LATE_DIFFERENTIATION_GENES_UP	1.77168	0.00200401	0.0157647
KEGG_GRAFT_VERSUS_HOST_DISEASE	1.76995	0.00210526	0.0322906
KEGG_PORPHYRIN_AND_CHLOROPHYLL_METABOLISM	1.76981	0	0.0317767
AZARE_NEOPLASTIC_TRANSFORMATION_BY_STAT3_DN	1.76832	0.0039604	0.0163513
BIOCARTA_NKCELLS_PATHWAY	1.76682	0.00206186	0.0324133
HERNANDEZ_ABERRANT_MITOSIS_BY_DOCETACEL_4NM_UP	1.76623	0.00823045	0.01663
FURUKAWA_DUSP6_TARGETS_PCI35_UP	1.76616	0.00191939	0.0165464
CAIRO_HEPATOBLASTOMA_CLASSES_DN	1.7656	0	0.0166212
CHIARETTI_ACUTE_LYMPHOBLASTIC_LEUKEMIA_ZAP70	1.76502	0.0019084	0.016683
GHANDHI_BYSTANDER_IRRADIATION_UP	1.76426	0	0.0167838
KEGG_TYPE_I_DIABETES_MELLITUS	1.76329	0.002	0.0331514
HINATA_NFKB_TARGETS_KERATINOCYTE_UP	1.76193	0	0.0172324
TCELL_CYTOKINE_INDUCED_IL2_IL7_IL15ONLY	1.76153	0.00209205	0.00764172
THEILGAARD_NEUTROPHIL_AT_SKIN_WOUND_UP	1.76133	0	0.0172354
BIOCARTA_P53_PATHWAY	1.76121	0.0040568	0.0334096
CROONQUIST_IL6_DEPRIVATION_UP	1.75765	0.00622407	0.0179067
CLL_BCR_CROSSLINKING_UP	1.75726	0.00390625	0.00779494
MIKKELSEN_IPS_LCP_WITH_H3K4ME3	1.75674	0	0.018019
PID_CD8_TCR_DOWNSTREAM_PATHWAY	1.75616	0.00198807	0.0348376
MYELOMA_LB_SUBGROUP_DOWN	1.75519	0	0.00762611
ZHOU_INFLAMMATORY_RESPONSE_LPS_UP	1.75516	0	0.0182749
BOYLAN_MULTIPLE_MYELOMA_D_DN	1.75399	0	0.0184701
GRAHAM_NORMAL_QUIESCENT_VS_NORMAL_DIVIDING_UP	1.75246	0	0.0186639
KOKKINAKIS_METHIONINE_DEPRIVATION_48HR_UP	1.75223	0	0.0186139
PLASMA_CELL_GT_MATURE_BCELL	1.7512	0	0.00780748
DAZARD_RESPONSE_TO_UV_SCC_UP	1.75063	0	0.0189988
NIKOLSKY_BREAST_CANCER_7Q21_Q22_AMPLICON	1.75001	0.00212314	0.0190832
ZHONG_SECRETOME_OF_LUNG_CANCER_AND_FIBROBLAST	1.74954	0	0.0191209
GAZDA_DIAMOND_BLACKFAN_ANEMIA_PROGENITOR_UP	1.74925	0	0.0190702
ROZANOV_MMP14_TARGETS_UP	1.74858	0	0.0191087
ZHAN_MULTIPLE_MYELOMA_LB_DN	1.74783	0	0.019191
WIERENGA_STAT5A_TARGETS_DN	1.74613	0	0.0193905
MULLIGHAN_MLL_SIGNATURE_2_UP	1.74595	0	0.0193389
WESTON_VEGFA_TARGETS_12HR	1.74573	0.00199203	0.019282
BECKER_TAMOXIFEN_RESISTANCE_UP	1.74558	0.00562852	0.0192372
IL6_LY10_UP_GROUP1	1.7449	0.00416667	0.00843929
BIOCARTA_RARRXR_PATHWAY	1.74349	0.0119048	0.0395326
HOWLIN_CITED1_TARGETS_1_UP	1.74169	0.0141129	0.0200446
QUIESCENCE_HEME_CLUSTER1	1.73914	0	0.00879305
SIMBULAN_UV_RESPONSE_NORMAL_DN	1.73799	0.00397614	0.0208204
BIOCARTA_DC_PATHWAY	1.7379	0.0037037	0.0411736
SWEET_LUNG_CANCER_KRAS_UP	1.73669	0	0.0210248
ZHAN_LATE_DIFFERENTIATION_GENES_UP	1.73662	0.00404858	0.0209423
BOHN_PRIMARY_IMMUNODEFICIENCY_SYNDROM_DN	1.7364	0.00408998	0.0209332
LINDGREN_BLADDER_CANCER_HIGH_RECURRENCE	1.73553	0.00591716	0.0210927
KEGG_ENDOMETRIAL_CANCER	1.73446	0.00197239	0.0421896
LU_IL4_SIGNALING	1.7314	0.0019084	0.0219988
SMID_BREAST_CANCER_NORMAL_LIKE_UP	1.73118	0	0.0219254
ANASTASSIOU_CANCER_MESENCHYMAL_TRANSITION_SIGNATURE	1.72871	0.00191205	0.0225004
REACTOME_SIGNALING_BY_WNT	1.72869	0	0.0445389
ELVIDGE_HIF1A_TARGETS_UP	1.72867	0	0.0223957
LEE_AGING_CEREBELLUM_UP	1.72852	0.00195312	0.0223624
DEBOSSCHER_NFKB_TARGETS_REPRESSED_BY_GLUCOCORTICOIDS	1.72849	0.00578035	0.022271
REACTOME_GPCR_LIGAND_BINDING	1.72672	0	0.0447451
PID_TAP63_PATHWAY	1.72522	0.002	0.0448222
NFKB_CHIPCHIP_YOUNG_4FACTORS	1.72494	0.00398406	0.0102763
VALK_AML_CLUSTER_9	1.72406	0.00412371	0.0232851
REACTOME_COSTIMULATION_BY_THE_CD28_FAMILY	1.72328	0.0037037	0.0450045
ST_G_ALPHA_I_PATHWAY	1.72232	0.00665188	0.044795
CLL_BCR_CROSSLINKING_UP_LYMPH_NODE_UP	1.71966	0.00407332	0.0108412
SANSOM_APC_TARGETS_DN	1.71907	0	0.0245653
PETROVA_ENDOTHELIUM_LYMPHATIC_VS_BLOOD_DN	1.7189	0	0.0245228
ST_B_CELL_ANTIGEN_RECEPTOR	1.71857	0.00395257	0.0462963
HERNANDEZ_MITOTIC_ARREST_BY_DOCETAXEL_1_UP	1.71853	0.0119522	0.0245319
CHUANG_OXIDATIVE_STRESS_RESPONSE_UP	1.71772	0.0038835	0.0246276
HOEBEKE_LYMPHOID_STEM_CELL_DN	1.71763	0.00393701	0.0245285
HAHTOLA_MYCOSIS_FUNGOIDES_CD4_UP	1.71691	0.0019685	0.0246115
KINSEY_TARGETS_OF_EWSR1_FLII_FUSION_DN	1.71651	0	0.024632
RUTELLA_RESPONSE_TO_HGF_VS_CSF2RB_AND_IL4_UP	1.7157	0	0.02473
KEGG_NATURAL_KILLER_CELL_MEDIATED_CYTOTOXICITY	1.71396	0	0.0480711
BLOOD_MODULE-2.6_MYELOID_LINEAGE-2	1.71353	0.00194553	0.0113034
DEMAGALHAES_AGING_UP	1.71302	0.00862069	0.0253714
FRIDMAN_IMMORTALIZATION_DN	1.71257	0.00613497	0.0253826
HAHTOLA_CTCL_CUTANEOUS	1.7125	0.00990099	0.0252937
CHEOK_RESPONSE_TO_HD_MTX_UP	1.71238	0.00829876	0.0252221
RUTELLA_RESPONSE_TO_HGF_DN	1.71236	0	0.0251236
ENK_UV_RESPONSE_EPIDERMIS_UP	1.71212	0	0.0250535
PID_CD8_TCR_PATHWAY	1.71188	0.00204918	0.0486553
HUTTMANN_B_CLL_POOR_SURVIVAL_UP	1.71156	0	0.0250823
ELVIDGE_HYPOXIA_DN	1.71073	0	0.0251758
BAUS_TFF2_TARGETS_UP	1.71057	0.00788955	0.0251008
PID_IL27_PATHWAY	1.71012	0.004	0.0489362
NFKB_UP_K1106	1.71005	0.0102669	0.0113197
REACTOME_TOLL_RECEPTOR_CASCADES	1.70999	0	0.0483324
FRASOR_TAMOXIFEN_RESPONSE_UP	1.70868	0.00828157	0.0254935
LENAOUR_DENDRITIC_CELL_MATURATION_DN	1.70834	0	0.0254934
KOBAYASHI_EGFR_SIGNALING_6HR_DN	1.7083	0.0125261	0.0253863
KANG_GIST_WITH_PDGFRA_UP	1.70773	0.006	0.0254605
ALCALA_APOPTOSIS	1.70761	0	0.0254017
BIOCARTA_IL22BP_PATHWAY	1.70669	0.0197628	0.0496829
RIGGINS_TAMOXIFEN_RESISTANCE_DN	1.70645	0	0.0255965
PICCALUGA_ANGIOIMMUNOBLASTIC_LYMPHOMA_DN	1.70409	0	0.0261365
LEE_NEURAL_CREST_STEM_CELL_UP	1.70216	0	0.0266088
WIERENGA_STAT5A_TARGETS_UP	1.70212	0	0.0265155
TOOKER_GEMCITABINE_RESISTANCE_UP	1.70191	0	0.0264649
HELLER_HDAC_TARGETS_SILENCED_BY_METHYLATION_UP	1.70095	0	0.0266354
TONKS_TARGETS_OF_RUNX1_RUNX1T1_FUSION_HSC_DN	1.70002	0	0.0268404
HOLLMANN_APOPTOSIS_VIA_CD40_DN	1.69985	0	0.0267884
BAELDE_DIABETIC_NEPHROPATHY_UP	1.69953	0	0.0267984
REACTOME_INNATE_IMMUNE_SYSTEM	1.69824	0	0.0536422
RICKMAN_HEAD_AND_NECK_CANCER_D	1.69824	0.0139165	0.0270161
SCHAEFFER_PROSTATE_DEVELOPMENT_12HR_DN	1.69739	0.00385356	0.0272061
MIKKELSEN_ES_LCP_WITH_H3K4ME3	1.69596	0.00201207	0.0275263
BOSCO_ALLERGEN_INDUCED_TH2_ASSOCIATED_MODULE	1.69548	0	0.0275581
HALLMARK_FATTY_ACID_METABOLISM	1.69405	0	0.00321062
TONKS_TARGETS_OF_RUNX1_RUNX1T1_FUSION_MONOCYTE_UP	1.69292	0	0.0281737
MALONEY_RESPONSE_TO_17AAG_UP	1.69286	0.00193798	0.0280781
PHONG_TNF_RESPONSE_NOT_VIA_P38	1.69239	0	0.0281121
GEISS_RESPONSE_TO_DSRNA_UP	1.6918	0.008	0.0282249
GENTILE_UV_LOW_DOSE_UP	1.69151	0.00628931	0.0282281
VALK_AML_CLUSTER_11	1.69051	0.00630252	0.0283948
NABA_SECRETED_FACTORS	1.68886	0	0.0585928
PID_CXCR4_PATHWAY	1.68722	0.00209644	0.0589104
ELVIDGE_HIF1A_AND_HIF2A_TARGETS_UP	1.68642	0.0139721	0.0294444
LENAOUR_DENDRITIC_CELL_MATURATION_UP	1.68603	0	0.0294531
BROWNE_HCMV_INFECTION_6HR_UP	1.68573	0.00428265	0.0294475
DAZARD_UV_RESPONSE_CLUSTER_G28	1.68572	0.0041841	0.0293356
SA_TRKA_RECEPTOR	1.68506	0.00772201	0.0593825
KEGG_ALZHEIMERS_DISEASE	1.68429	0.00198413	0.0591546
KYNG_DNA_DAMAGE_BY_4NQO_OR_UV	1.68416	0	0.0297244
TCELL_CYTOKINE_INDUCED_PMBC_BCELL_INDUCED	1.68373	0.00613497	0.0147725
REACTOME_CTLA4_INHIBITORY_SIGNALING	1.68334	0.0125	0.059107
NATSUME_RESPONSE_TO_INTERFERON_BETA_UP	1.68278	0	0.0300288
ZHOU_INFLAMMATORY_RESPONSE_LIVE_UP	1.68121	0	0.0304729
REACTOME_AUTODEGRADATION_OF_CDH1_BY_CDH1_APC_C	1.6799	0.00401606	0.0605575
PID_INTEGRIN5_PATHWAY	1.67984	0.0184426	0.0599097
GALE_APL_WITH_FLT3_MUTATED_DN	1.67909	0.00852879	0.031108
REACTOME_HEMOSTASIS	1.67769	0	0.0604315
PEDERSEN_METASTASIS_BY_ERBB2_ISOFORM_4	1.67664	0.00389105	0.0318047
BIOCARTA_FAS_PATHWAY	1.67264	0.0135135	0.0628699
REACTOME_HOST_INTERACTIONS_OF_HIV_FACTORS	1.67262	0	0.0621214
REACTOME_P53_INDEPENDENT_G1_S_DNA_DAMAGE_CHECKPOINT	1.67232	0.014	0.0615503
QUIESCENCE_HEME_ALL	1.67221	0	0.0162852
CHAUHAN_RESPONSE_TO_METHOXYESTRADIOL_DN	1.67131	0.00195695	0.0333305
SCHEIDEREIT_IKK_INTERACTING_PROTEINS	1.67043	0.00200401	0.0334471
ADDYA_ERYTHROID_DIFFERENTIATION_BY_HEMIN	1.66977	0	0.0335237
REACTOME_IL_2_SIGNALING	1.66851	0.00804829	0.0633678
IGLESIAS_E2F_TARGETS_UP	1.6683	0	0.0339009
DALESSIO_TSA_RESPONSE	1.66806	0.00829876	0.0338782
NIKOLSKY_BREAST_CANCER_8Q12_Q22_AMPLICON	1.66609	0.00393701	0.0344882
KEGG_BLADDER_CANCER	1.66341	0.00590551	0.0655504
RAGHAVACHARI_PLATELET_SPECIFIC_GENES	1.66257	0.00606061	0.0356853
PHONG_TNF_TARGETS_UP	1.66225	0	0.0356529
PID_ATF2_PATHWAY	1.66201	0.00609756	0.065597
STAEGE_EWING_FAMILY_TUMOR	1.66194	0.00828157	0.0356211
SHARMA_PILOCYTIC_ASTROCYTOMA_LOCATION_UP	1.66073	0.0123203	0.0359763
HERNANDEZ_MITOTIC_ARREST_BY_DOCETAXEL_2_UP	1.65797	0.00205761	0.0367967
KYNG_RESPONSE_TO_H2O2	1.65752	0.0059761	0.0367734
REACTOME_ORC1_REMOVAL_FROM_CHROMATIN	1.65587	0.00198413	0.0689255
REACTOME_HIV_INFECTION	1.65577	0	0.0682345
KEGG_P53_SIGNALING_PATHWAY	1.65551	0.00608519	0.067725
REACTOME_TCA_CYCLE_AND_RESPIRATORY_ELECTRON_TRANSPORT	1.65495	0	0.0674579
DAZARD_UV_RESPONSE_CLUSTER_G2	1.6537	0.00824742	0.0380733
REACTOME_DOWNSTREAM_SIGNALING_EVENTS_OF_B_CELL_RECEPTOR_BCR	1.65327	0	0.0679132
TAKEDA_TARGETS_OF_NUP98_HOXA9_FUSION_16D_DN	1.65179	0	0.0387256
KEGG_INTESTINAL_IMMUNE_NETWORK_FOR_IGA_PRODUCTION	1.65159	0.00412371	0.0682968
AZARE_NEOPLASTIC_TRANSFORMATION_BY_STAT3_UP	1.65081	0	0.0390284
MUELLER_METHYLATED_IN_GLIOBLASTOMA	1.65028	0.0100402	0.0391092
INGA_TP53_TARGETS	1.64969	0.01875	0.0391819
WANG_HCP_PROSTATE_CANCER	1.64779	0.00394477	0.0397629
ZHANG_TARGETS_OF_EWSR1_FLI1_FUSION	1.64715	0.0039604	0.039889
REACTOME_CDT1_ASSOCIATION_WITH_THE_CDC6_ORC_ORIGIN_COMPLEX	1.64642	0.0059761	0.0714255
REACTOME_G_ALPHA_I_SIGNALLING_EVENTS	1.64582	0	0.0711176
CERIBELLI_PROMOTERS_INACTIVE_AND_BOUND_BY_NFY	1.64508	0.00398406	0.0404371
CHUNG_BLISTER_CYTOTOXICITY_UP	1.64422	0.00198413	0.0406623
KIM_ALL_DISORDERS_CALB1_CORR_DN	1.64359	0.0155945	0.0407623
ZHAN_MULTIPLE_MYELOMA_SPIKED	1.64345	0.0161616	0.0406871
GC_T_HELPER_UP4X_CHTANOVA	1.64296	0	0.0214174
REACTOME_REGULATION_OF_APOPTOSIS	1.64295	0.0100402	0.0724113
PID_IFNG_PATHWAY	1.64205	0.0131332	0.072466
MULLIGHAN_MLL_SIGNATURE_1_UP	1.64153	0	0.0413354
TURASHVILI_BREAST_LOBULAR_CARCINOMA_VS_DUCTAL_NORMAL_UP	1.64144	0.00197628	0.0412203
JI_RESPONSE_TO_FSH_UP	1.63993	0.00402414	0.0416706
GHANDHI_DIRECT_IRRADIATION_UP	1.6398	0	0.0415508
WANG_RESPONSE_TO_BEXAROTENE_DN	1.6395	0.0136452	0.0415133
RORIE_TARGETS_OF_EWSR1_FLI1_FUSION_UP	1.63858	0.016129	0.0417276
WORSCHECH_TUMOR_EVASION_AND_TOLEROGENICITY_UP	1.63818	0.0102041	0.0417583
SARRIO_EPITHELIAL_MESENCHYMAL_TRANSITION_DN	1.63666	0	0.0421612
HONMA_DOCETAXEL_RESISTANCE	1.63665	0.0103306	0.042025
ODONNELL_TFRC_TARGETS_UP	1.63665	0	0.0418896
PID_AP1_PATHWAY	1.63557	0.0040404	0.0759779
RUTELLA_RESPONSE_TO_CSF2RB_AND_IL4_DN	1.63553	0	0.0422244
CONCANNON_APOPTOSIS_BY_EPOXOMICIN_UP	1.63539	0	0.042165
FLECHNER_PBL_KIDNEY_TRANSPLANT_REJECTED_VS_OK_UP	1.63533	0.00767754	0.0420723
HOFFMANN_IMMATURE_TO_MATURE_B_LYMPHOCYTE_UP	1.63374	0.0113208	0.0426039
BERTUCCI_INVASIVE_CARCINOMA_DUCTAL_VS_LOBULAR_UP	1.63184	0.013834	0.0433292
IIZUKA_LIVER_CANCER_PROGRESSION_L0_L1_DN	1.63165	0.0125261	0.0432423
SCHUETZ_BREAST_CANCER_DUCTAL_INVASIVE_UP	1.63061	0	0.0435547
CHARAFE_BREAST_CANCER_LUMINAL_VS_BASAL_DN	1.63037	0	0.0435161
DURAND_STROMA_NS_UP	1.63026	0	0.0434208
TAKAO_RESPONSE_TO_UVB_RADIATION_UP	1.63	0	0.0433865
REACTOME_TRIF_MEDIATED_TLR3_SIGNALING	1.62969	0.00202429	0.079374
BIOCARTA_EPO_PATHWAY	1.62861	0.0146444	0.079539
TCELL_PIIND_CALCIUMDEFPTDOWN4X_FESKE_FIG6	1.6286	0	0.0243357
CROMER_TUMORIGENESIS_UP	1.62711	0.00607287	0.0443557
ST_INTERLEUKIN_4_PATHWAY	1.62635	0.0160321	0.0802994
HUMMERICH_SKIN_CANCER_PROGRESSION_UP	1.6262	0.00199601	0.0446277
REACTOME_TRAF6_MEDIATED_IRF7_ACTIVATION	1.62593	0.0194553	0.0800445
LINDGREN_BLADDER_CANCER_CLUSTER_2B	1.62559	0	0.0447351
PID_KIT_PATHWAY	1.6243	0.00988142	0.0805459
MARTENS_BOUND_BY_PML_RARA_FUSION	1.62371	0	0.0454515
HALLMARK_EPITHELIAL_MESENCHYMAL_TRANSITION	1.62363	0	0.00737214
TAKEDA_TARGETS_OF_NUP98_HOXA9_FUSION_10D_DN	1.62265	0.0019802	0.0458074
GROSS_ELK3_TARGETS_UP	1.62044	0.0107759	0.0466562
HSIAO_HOUSEKEEPING_GENES	1.62018	0	0.0466129
MARZEC_IL2_SIGNALING_DN	1.61988	0.00793651	0.0466024
KORKOLA_EMBRYONIC_CARCINOMA_VS_SEMINOMA_DN	1.61964	0.0217391	0.0465479
CLL_MUTATED_GT_CLL_UNMUTATED	1.61955	0.0209644	0.0257316
BIOCARTA_BIOPEPTIDES_PATHWAY	1.61868	0.0120724	0.0839613
WOOD_EBV_EBNA1_TARGETS_UP	1.61817	0.0019084	0.0470611
BIOCARTA_CASPASE_PATHWAY	1.61784	0.0180723	0.0839464
DELLA_RESPONSE_TO_TSA_AND_BUTYRATE	1.61764	0.0273684	0.0471127
MITSIADES_RESPONSE_TO_APLIDIN_UP	1.61762	0	0.0469668
RAMALHO_STEMNESS_DN	1.61743	0.0020202	0.0469006
AMUNDSON_DNA_DAMAGE_RESPONSE_TP53	1.61651	0.0124481	0.0471585
HUMMEL_BURKITTS_LYMPHOMA_DN	1.6161	0.0239521	0.0471766
YU_MYC_TARGETS_DN	1.61533	0.00813008	0.0472888
LIU_CDX2_TARGETS_UP	1.61508	0.00816326	0.0472376
HUPER_BREAST_BASAL_VS_LUMINAL_DN	1.61481	0.0135397	0.0472286
TCELL_PIIND_CSADOWN4X	1.61438	0.004	0.0269175
IVANOVSKA_MIR106B_TARGETS	1.61305	0.00194553	0.0478557
MORI_MATURE_B_LYMPHOCYTE_UP	1.61228	0.006	0.0480618
DEURIG_T_CELL_PROLYMPHOCYTIC_LEUKEMIA_DN	1.61211	0	0.0480006
BRACHAT_RESPONSE_TO_CISPLATIN	1.61149	0.0244399	0.0481466
PID_RAC1_PATHWAY	1.61146	0.00205339	0.0878987
BOQUEST_STEM_CELL_UP	1.61059	0	0.0483975
NGUYEN_NOTCH1_TARGETS_DN	1.60932	0.00584795	0.0487976
OKUMURA_INFLAMMATORY_RESPONSE_LPS	1.60929	0	0.0486675
SATO_SILENCED_BY_METHYLATION_IN_PANCREATIC_CANCER_1	1.60896	0	0.0486927
STEARMAN_LUNG_CANCER_EARLY_VS_LATE_DN	1.60892	0.00598802	0.04856
SATO_SILENCED_EPIGENETICALLY_IN_PANCREATIC_CANCER	1.60821	0.00788955	0.0487911
KEGG_JAK_STAT_SIGNALING_PATHWAY	1.60745	0	0.0902058
HOWLIN_CITED1_TARGETS_2_UP	1.60739	0.035865	0.049068
WILENSKY_RESPONSE_TO_DARAPLADIB	1.60711	0.0083682	0.0490918
REACTOME_AMYLOIDS	1.60616	0.00554529	0.0904216
PID_PDGFRB_PATHWAY	1.60581	0.00419287	0.0898937
AKL_HTLV1_INFECTION_DN	1.60497	0	0.0499616
MORI_IMMATURE_B_LYMPHOCYTE_UP	1.60485	0.00598802	0.0498562
ROSS_LEUKEMIA_WITH_MLL_FUSIONS	1.60462	0.0075188	0.0498181
BIOCARTA_P38MAPK_PATHWAY	1.60438	0.011976	0.0902261
PEDRIOLI_MIR31_TARGETS_DN	1.60374	0	0.0500966
KEGG_RIG_I_LIKE_RECEPTOR_SIGNALING_PATHWAY	1.60338	0.00573614	0.0903141
ROVERSI_GLIOMA_COPY_NUMBER_DN	1.6026	0.00854701	0.050418
BIOCARTA_PDGF_PATHWAY	1.60243	0.0180723	0.0902107
BIOCARTA_CDC42RAC_PATHWAY	1.60213	0.0233918	0.0896108
DORN_ADENOVIRUS_INFECTION_24HR_DN	1.60201	0.00592885	0.0505501
SAKAI_TUMOR_INFILTRATING_MONOCYTES_DN	1.60046	0.0152381	0.0512761
WAMUNYOKOLI_OVARIAN_CANCER_LMP_UP	1.60041	0	0.0511473
ZHAN_MULTIPLE_MYELOMA_MS_UP	1.59805	0.0187891	0.0521062
ST_DIFFERENTIATION_PATHWAY_IN_PC12_CELLS	1.5978	0.00641026	0.0916952
YAMASHITA_METHYLATED_IN_PROSTATE_CANCER	1.59771	0.0174081	0.0521205
PID_IL8_CXCR1_PATHWAY	1.59667	0.0217822	0.0917198
BLOOD_MODULE-2.8_T_CELLS	1.59572	0.00186916	0.0311754
WONG_MITOCHONDRIA_GENE_MODULE	1.59554	0	0.0530104
REACTOME_APOPTOSIS	1.59492	0.00189394	0.0924227
PID_IL2_1PATHWAY	1.59439	0.00408163	0.0920147
YORDY_RECIPROCAL_REGULATION_BY_ETS1_AND_SP100_UP	1.59348	0.0278884	0.0538515
HASLINGER_B_CLL_WITH_6Q21_DELETION	1.59216	0.0313152	0.054208
VERHAAK_AML_WITH_NPM1_MUTATED_DN	1.59169	0	0.0543268
LE_SKI_TARGETS_UP	1.59141	0.0337972	0.0543239
PICCALUGA_ANGIOIMMUNOBLASTIC_LYMPHOMA_UP	1.59119	0	0.0542783
BIOCARTA_RHO_PATHWAY	1.59091	0.0174081	0.0940772
PAX5_REPRESSED	1.5902	0.00795229	0.0325537
REACTOME_ACTIVATED_TLR4_SIGNALLING	1.58886	0.00392927	0.0950793
MIKKELSEN_MEF_LCP_WITH_H3K4ME3	1.58866	0.00191939	0.0553229
NUTT_GBM_VS_AO_GLIOMA_UP	1.58855	0.00792079	0.0552324
MOHANKUMAR_TLX1_TARGETS_DN	1.58855	0.00205761	0.055079
REACTOME_G_ALPHA_Q_SIGNALLING_EVENTS	1.58851	0.00189394	0.0945826
SMIRNOV_CIRCULATING_ENDOTHELIOCYTES_IN_CANCER_UP	1.58837	0.00617284	0.0550324
KEGG_PARKINSONS_DISEASE	1.58695	0.00212766	0.0950698
MAHADEVAN_RESPONSE_TO_MP470_UP	1.58695	0.0161943	0.0556226
KEGG_B_CELL_RECEPTOR_SIGNALING_PATHWAY	1.58668	0.00619835	0.0945063
MANN_RESPONSE_TO_AMIFOSTINE_UP	1.58592	0.0485232	0.0559776
BOQUEST_STEM_CELL_CULTURED_VS_FRESH_UP	1.58451	0	0.0565771
HELLEBREKERS_SILENCED_DURING_TUMOR_ANGIOGENESIS	1.58434	0.0078125	0.0565053
SASSON_RESPONSE_TO_GONADOTROPHINS_UP	1.58427	0.00790514	0.0563787
KEGG_LEUKOCYTE_TRANSENDOTHELIAL_MIGRATION	1.58419	0.00387597	0.0962094
REACTOME_IRON_UPTAKE_AND_TRANSPORT	1.58379	0.012474	0.0957733
RESTING_BLOOD_B_CELL_GNF	1.5837	0	0.0338178
JIANG_AGING_CEREBRAL_CORTEX_UP	1.5836	0.0221328	0.0565729
REACTOME_TRAF6_MEDIATED_INDUCTION_OF_NFKB_AND_MAP_KINASES_UPON_TLR7_8_OR_9_ACTIVATION	1.58357	0.00195695	0.0952405
MAHAJAN_RESPONSE_TO_IL1A_UP	1.58308	0.00209205	0.0566806
HOQUE_METHYLATED_IN_CANCER	1.58228	0.0175781	0.0568599
BLOOD_MODULE-1.2_PLATELETS	1.5821	0.00400802	0.0336575
YANG_MUC2_TARGETS_DUODENUM_6MO_DN	1.5813	0.0234043	0.0572179
PATTERSON_DOCETAXEL_RESISTANCE	1.58087	0.019685	0.0573053
PID_IL8_CXCR2_PATHWAY	1.58026	0.020284	0.097549
REACTOME_CLASS_I_MHC_MEDIATED_ANTIGEN_PROCESSING_PRESENTATION	1.57852	0	0.0981694
PARK_APL_PATHOGENESIS_DN	1.57794	0.0142276	0.0586568
KEGG_INOSITOL_PHOSPHATE_METABOLISM	1.57747	0.00996016	0.0982728
MCDOWELL_ACUTE_LUNG_INJURY_DN	1.57733	0.0135135	0.0587165
REACTOME_PD1_SIGNALING	1.57711	0.0309917	0.097807
MYELOMA_MS_SUBGROUP_UP	1.577	0.00632911	0.0344455
WOTTON_RUNX_TARGETS_UP	1.57648	0.0237069	0.0590059
NAKAJIMA_EOSINOPHIL	1.57612	0.0164609	0.0590277
KEGG_LEISHMANIA_INFECTION	1.57609	0.0117188	0.0977285
KONDO_PROSTATE_CANCER_WITH_H3K27ME3	1.57481	0	0.0596462
BIOCARTA_IL2_PATHWAY	1.57466	0.0275591	0.0983263
HAN_JNK_SINGALING_UP	1.57439	0.0143737	0.0596864
GERHOLD_ADIPOGENESIS_UP	1.57438	0.0142566	0.0595285
YANG_MUC2_TARGETS_DUODENUM_3MO_DN	1.57421	0.0342052	0.0594483
SA_G1_AND_S_PHASES	1.57333	0.037037	0.0987253
CD8_T_EFFECTORUP_MEMORYUP_NAIVEDN	1.57329	0.0283976	0.0349642
ELVIDGE_HYPOXIA_BY_DMOG_DN	1.57327	0.00959693	0.0596956
MORI_LARGE_PRE_BII_LYMPHOCYTE_DN	1.57309	0.0124481	0.0596393
REACTOME_MITOCHONDRIAL_TRNA_AMINOACYLATION	1.57224	0.029703	0.0990953
REACTOME_APC_C_CDH1_MEDIATED_DEGRADATION_OF_CDC20_AND_OTHER_APC_C_CDH1_TARGETED_PROTEINS_IN_LATE_MITOSIS_EARLY_G1	1.57141	0.0119522	0.0989873
TCELL_CYTOKINE_INDUCED_PBMC_BCELL_NOCHANGE	1.57088	0.0203666	0.0350895
KORKOLA_YOLK_SAC_TUMOR_UP	1.57058	0.0314961	0.0608162
URS_ADIPOCYTE_DIFFERENTIATION_DN	1.56991	0.0201207	0.0609884
ZHAN_MULTIPLE_MYELOMA_MF_UP	1.56972	0.0216535	0.0609188
TONKS_TARGETS_OF_RUNX1_RUNX1T1_FUSION_HSC_UP	1.56954	0	0.0608751
CREIGHTON_AKT1_SIGNALING_VIA_MTOR_UP	1.56892	0.0164609	0.0610294
STEARMAN_TUMOR_FIELD_EFFECT_UP	1.56833	0.0180361	0.0611177
SESTO_RESPONSE_TO_UV_C0	1.56774	0.00385356	0.0612585
HALLMARK_ADIPOGENESIS	1.56692	0	0.0110857
WANG_SMARCE1_TARGETS_UP	1.56673	0	0.0616016
PGC-1ALPHA_OVEREPXRESSION_UP	1.56661	0.0148936	0.0357719
HORIUCHI_WTAP_TARGETS_UP	1.56656	0	0.0615375
HAHTOLA_SEZARY_SYNDROM_DN	1.56631	0.0203666	0.0614868
JOSEPH_RESPONSE_TO_SODIUM_BUTYRATE_UP	1.56631	0.0160966	0.06133
WENG_POR_DOSAGE	1.56453	0.0391753	0.0619996
TAKEDA_TARGETS_OF_NUP98_HOXA9_FUSION_6HR_UP	1.56338	0.00404858	0.0625001
ALFANO_MYC_TARGETS	1.5617	0	0.0631378
ZHANG_ANTIVIRAL_RESPONSE_TO_RIBAVIRIN_DN	1.56145	0.010101	0.0631101
GILDEA_METASTASIS	1.56007	0.0287474	0.0636716
TING_SILENCED_BY_DICER	1.55922	0.0417495	0.0639572
GAL_LEUKEMIC_STEM_CELL_DN	1.55883	0	0.0640362
WANG_BARRETTS_ESOPHAGUS_AND_ESOPHAGUS_CANCER_UP	1.55854	0.0271967	0.0640406
WOO_LIVER_CANCER_RECURRENCE_UP	1.55726	0.0132827	0.0645145
BAKKER_FOXO3_TARGETS_UP	1.55698	0.00986193	0.0644859
YAO_TEMPORAL_RESPONSE_TO_PROGESTERONE_CLUSTER_5	1.55618	0.0263653	0.0647508
BILBAN_B_CLL_LPL_UP	1.55494	0.0130435	0.0652901
HOFMANN_MYELODYSPLASTIC_SYNDROM_LOW_RISK_DN	1.55413	0.0143443	0.0655737
THUM_SYSTOLIC_HEART_FAILURE_UP	1.55375	0	0.065628
TAVOR_CEBPA_TARGETS_UP	1.5534	0.0172745	0.0656857
GC_T_HELPER_UP2X_CHTANOVA	1.55313	0	0.0391865
GEORGANTAS_HSC_MARKERS	1.55188	0.0180723	0.0663382
LIU_IL13_PRIMING_MODEL	1.55145	0.039604	0.0664147
TAKEDA_TARGETS_OF_NUP98_HOXA9_FUSION_8D_DN	1.55032	0	0.0668468
GAVIN_FOXP3_TARGETS_CLUSTER_P4	1.55026	0.0116279	0.0667242
SHIN_B_CELL_LYMPHOMA_CLUSTER_8	1.5501	0.0254902	0.0666455
FUKUSHIMA_TNFSF11_TARGETS	1.54957	0.0366379	0.0667451
TONKS_TARGETS_OF_RUNX1_RUNX1T1_FUSION_ERYTHROCYTE_UP	1.54796	0	0.067421
LIU_VAV3_PROSTATE_CARCINOGENESIS_UP	1.54782	0.01002	0.0673441
FOLLICULAR_LYMPHOMA_IMMUNE_RESPONSE2	1.54519	0.0298805	0.0417662
RUAN_RESPONSE_TO_TNF_TROGLITAZONE_UP	1.54426	0.0350109	0.0693132
MARSON_FOXP3_TARGETS_DN	1.54415	0.012024	0.069226
BROWNE_HCMV_INFECTION_48HR_DN	1.54388	0	0.0692028
CERVERA_SDHB_TARGETS_1_UP	1.54262	0.00587084	0.0697218
TSAI_RESPONSE_TO_RADIATION_THERAPY	1.54254	0.0319361	0.0695983
TAVOR_CEBPA_TARGETS_DN	1.54134	0.0316456	0.0701238
LI_CISPLATIN_RESISTANCE_DN	1.5413	0.036965	0.0699787
REGULATORY_T_CELL_MCHUGH_HERMAN_CONCENSUS	1.5397	0.0355731	0.0430002
RIZKI_TUMOR_INVASIVENESS_3D_DN	1.53961	0	0.0707759
HARRIS_BRAIN_CANCER_PROGENITORS	1.53923	0.0329457	0.0708247
BURTON_ADIPOGENESIS_PEAK_AT_0HR	1.53906	0.00798403	0.0707446
FINETTI_BREAST_CANCER_KINOME_GREEN	1.53892	0.0262626	0.0706796
LIU_SMARCA4_TARGETS	1.53864	0.0123967	0.0706984
WANG_RESPONSE_TO_GSK3_INHIBITOR_SB216763_UP	1.53808	0	0.070885
NIKOLSKY_BREAST_CANCER_12Q13_Q21_AMPLICON	1.53631	0.0239044	0.0717814
MIKKELSEN_MCV6_ICP_WITH_H3K4ME3_AND_H3K27ME3	1.53568	0.0334728	0.071978
MYELOMA_MF_SUBGROUP_UP	1.53564	0.026975	0.0434017
SCHEIDEREIT_IKK_TARGETS	1.53467	0.0497836	0.0723906
MCCABE_HOXC6_TARGETS_DN	1.53458	0.0465587	0.0722699
WANG_CLIM2_TARGETS_DN	1.53355	0	0.0727117
OLSSON_E2F3_TARGETS_UP	1.53326	0.0492813	0.072723
LEE_LIVER_CANCER_MYC_TGFA_UP	1.53311	0.0277228	0.0726262
ROSS_AML_WITH_MLL_FUSIONS	1.53209	0.0140562	0.0731437
MYLLYKANGAS_AMPLIFICATION_HOT_SPOT_17	1.53207	0.043299	0.0729852
LU_TUMOR_ENDOTHELIAL_MARKERS_UP	1.53202	0.023622	0.0728563
BEGUM_TARGETS_OF_PAX3_FOXO1_FUSION_UP	1.53188	0.0141414	0.0727715
CROMER_METASTASIS_DN	1.53163	0.01002	0.0727556
BURTON_ADIPOGENESIS_6	1.53063	0	0.0731449
WANG_BARRETTS_ESOPHAGUS_AND_ESOPHAGUS_CANCER_DN	1.52954	0.0223124	0.0736139
MYELOID_NODE1536	1.5294	0.0313152	0.044958
TCELL_PIREP4X_FESKE_FIG4	1.52872	0.0448065	0.044455
CHUNG_BLISTER_CYTOTOXICITY_DN	1.52842	0.026975	0.0741799
DITTMER_PTHLH_TARGETS_UP	1.52825	0.00196078	0.0741106
WOO_LIVER_CANCER_RECURRENCE_DN	1.52733	0.0209125	0.074534
WANG_TUMOR_INVASIVENESS_UP	1.52697	0	0.0745603
ROVERSI_GLIOMA_COPY_NUMBER_UP	1.52657	0.0075188	0.0746686
LIAN_NEUTROPHIL_GRANULE_CONSTITUENTS	1.52565	0.035514	0.0751018
LINSLEY_MIR16_TARGETS	1.52528	0.00205339	0.075161
FOSTER_TOLERANT_MACROPHAGE_DN	1.52484	0.00191205	0.0753125
HALLMARK_BILE_ACID_METABOLISM	1.52414	0.00421053	0.0164834
YANG_BREAST_CANCER_ESR1_LASER_DN	1.52262	0.0199601	0.0764335
DURAND_STROMA_S_UP	1.52239	0	0.0764053
MAGRANGEAS_MULTIPLE_MYELOMA_IGG_VS_IGA_UP	1.52195	0.0320641	0.0765047
HELLER_HDAC_TARGETS_DN	1.52061	0.00199203	0.0771322
RIGGI_EWING_SARCOMA_PROGENITOR_UP	1.51967	0	0.0774781
KANG_FLUOROURACIL_RESISTANCE_DN	1.51735	0.0556745	0.0787381
HAHTOLA_SEZARY_SYNDROM_UP	1.51603	0.013834	0.079383
BILANGES_SERUM_SENSITIVE_VIA_TSC1	1.51599	0.045929	0.0792376
HALLMARK_ESTROGEN_RESPONSE_LATE	1.51553	0	0.0167264
VANDESLUIS_COMMD1_TARGETS_GROUP_4_UP	1.51386	0.0475207	0.0803521
CHIANG_LIVER_CANCER_SUBCLASS_UNANNOTATED_DN	1.51381	0	0.0802272
LU_AGING_BRAIN_UP	1.51307	0	0.0804808
DELPUECH_FOXO3_TARGETS_UP	1.51306	0.0104822	0.0803093
BLOOD_MODULE-3.2_INFLAMMATION-1	1.51296	0.00204082	0.0492518
GUENTHER_GROWTH_SPHERICAL_VS_ADHERENT_DN	1.51223	0.0470348	0.080697
ZHONG_RESPONSE_TO_AZACITIDINE_AND_TSA_UP	1.51061	0.0040404	0.0816275
SCIAN_INVERSED_TARGETS_OF_TP53_AND_TP73_DN	1.51056	0.0319829	0.0814983
KIM_WT1_TARGETS_12HR_UP	1.50997	0.00202429	0.081685
ZHONG_SECRETOME_OF_LUNG_CANCER_AND_MACROPHAGE	1.50992	0.0182186	0.081556
NIELSEN_GIST_AND_SYNOVIAL_SARCOMA_DN	1.50937	0.0447761	0.0817601
DURCHDEWALD_SKIN_CARCINOGENESIS_UP	1.50923	0.0155039	0.0816748
HADDAD_T_LYMPHOCYTE_AND_NK_PROGENITOR_DN	1.5076	0.0298805	0.082592
LINDSTEDT_DENDRITIC_CELL_MATURATION_C	1.50721	0.0135397	0.0826877
ALONSO_METASTASIS_DN	1.50715	0.0431373	0.0825396
MARTORIATI_MDM4_TARGETS_NEUROEPITHELIUM_DN	1.50703	0.006	0.0824433
GOLDRATH_ANTIGEN_RESPONSE	1.50695	0	0.0823176
TESTIS_NODE1662	1.50617	0.0212766	0.0514238
KIM_GLIS2_TARGETS_UP	1.50602	0.0102669	0.0827226
LEE_LIVER_CANCER_E2F1_DN	1.50556	0.0178571	0.082837
BRUECKNER_TARGETS_OF_MIRLET7A3_UP	1.50502	0.00578035	0.0830191
KYNG_DNA_DAMAGE_BY_4NQO	1.50498	0.0280561	0.0828746
MADAN_DPPA4_TARGETS	1.50429	0.0278884	0.0831148
COATES_MACROPHAGE_M1_VS_M2_DN	1.50369	0.0220884	0.0833383
KUMAR_TARGETS_OF_MLL_AF9_FUSION	1.5036	0	0.083226
ZEMBUTSU_SENSITIVITY_TO_MITOMYCIN	1.50346	0.0532787	0.0831532
KEEN_RESPONSE_TO_ROSIGLITAZONE_DN	1.5033	0.0123711	0.0830829
TARTE_PLASMA_CELL_VS_PLASMABLAST_DN	1.50327	0.00193424	0.082922
HELLER_HDAC_TARGETS_UP	1.50254	0	0.0832614
BECKER_TAMOXIFEN_RESISTANCE_DN	1.50229	0.0237154	0.0832281
CLIMENT_BREAST_CANCER_COPY_NUMBER_UP	1.50138	0.0449679	0.0836482
KAAB_HEART_ATRIUM_VS_VENTRICLE_DN	1.50028	0.0019305	0.0843049
ONDER_CDH1_TARGETS_2_DN	1.49996	0	0.0843788
BHAT_ESR1_TARGETS_VIA_AKT1_UP	1.49886	0	0.0849068
HERNANDEZ_ABERRANT_MITOSIS_BY_DOCETACEL_2NM_UP	1.49867	0.0152381	0.084837
SERVITJA_ISLET_HNF1A_TARGETS_UP	1.49836	0.00578035	0.0848827
SASSON_RESPONSE_TO_FORSKOLIN_UP	1.49787	0.0191489	0.0850696
MCBRYAN_PUBERTAL_BREAST_3_4WK_UP	1.49776	0	0.0849922
ABRAHAM_ALPC_VS_MULTIPLE_MYELOMA_UP	1.49664	0.0380762	0.0855167
NAKAYAMA_SOFT_TISSUE_TUMORS_PCA2_DN	1.49635	0.00591716	0.085541
OSWALD_HEMATOPOIETIC_STEM_CELL_IN_COLLAGEN_GEL_UP	1.49595	0	0.085693
TCELL_PIREP_CALCIUMDEFPTUP4X_FESKE_FIG4	1.49545	0.0428016	0.055541
GRABARCZYK_BCL11B_TARGETS_UP	1.49544	0.0136719	0.0858687
BLIMP_BCELL_REPRESSED	1.49381	0.0243902	0.055363
DUNNE_TARGETS_OF_AML1_MTG8_FUSION_UP	1.49362	0.0397614	0.0869228
RASHI_RESPONSE_TO_IONIZING_RADIATION_2	1.49345	0.00743494	0.0868575
FARMER_BREAST_CANCER_APOCRINE_VS_BASAL	1.49255	0	0.0873116
GC_B_CELL_BLLOW_DLBCLHIGH	1.49166	0.0265306	0.0557348
MCBRYAN_PUBERTAL_TGFB1_TARGETS_DN	1.49078	0.0238095	0.0883085
LIEN_BREAST_CARCINOMA_METAPLASTIC	1.49004	0.0446247	0.0887138
ZHOU_INFLAMMATORY_RESPONSE_FIMA_UP	1.48997	0	0.0885679
HERNANDEZ_MITOTIC_ARREST_BY_DOCETAXEL_1_DN	1.48989	0.0459082	0.0884679
JOHANSSON_BRAIN_CANCER_EARLY_VS_LATE_DN	1.48907	0.0389105	0.0888523
HIRSCH_CELLULAR_TRANSFORMATION_SIGNATURE_UP	1.48881	0.00193424	0.0888773
BLOOD_MODULE-3.7_UNDETERMINED	1.48831	0	0.0564389
ONDER_CDH1_TARGETS_3_UP	1.48762	0.0578512	0.0895472
XBP1_TARGET_OTHER	1.4875	0.0344828	0.056012
MODY_HIPPOCAMPUS_POSTNATAL	1.48658	0.0282609	0.0900029
GLUTAMINE_GLUCOSE_STARVE_BOTH_DOWN	1.48633	0	0.055694
KRIEG_KDM3A_TARGETS_NOT_HYPOXIA	1.48548	0.00199601	0.0906279
NEMETH_INFLAMMATORY_RESPONSE_LPS_UP	1.48315	0.0238095	0.0920808
KAYO_AGING_MUSCLE_DN	1.48302	0.022541	0.0919752
MURAKAMI_UV_RESPONSE_6HR_DN	1.48271	0.0524109	0.0919892
NOTCH_T-ALL_UP_SHARMA	1.48243	0.0364026	0.0564802
PI3K_OVEREXPRESSION_UP	1.48207	0.00996016	0.0558882
BERENJENO_TRANSFORMED_BY_RHOA_DN	1.48072	0	0.0933606
LOCKWOOD_AMPLIFIED_IN_LUNG_CANCER	1.48071	0.00191571	0.0931891
RAY_TARGETS_OF_P210_BCR_ABL_FUSION_UP	1.48042	0.0535714	0.0932392
TCELL_PIIND4X_CSAINDEPENDENT	1.48005	0.0527426	0.05602
LEI_HOXC8_TARGETS_DN	1.47901	0.0560928	0.0940527
THYMIC_SP_CD4+TCELL_GT_BLOOD_CD4+TCELL	1.47859	0.0119284	0.0559093
YAGI_AML_FAB_MARKERS	1.47731	0.00193798	0.0950583
WATANABE_RECTAL_CANCER_RADIOTHERAPY_RESPONSIVE_DN	1.47697	0.0241935	0.0951521
DAVICIONI_TARGETS_OF_PAX_FOXO1_FUSIONS_DN	1.4765	0.0220441	0.0953091
TCELL_CYTOKINE_INDUCED_IL2_IL7_IL15_IL4	1.47583	0.0623656	0.0562859
PENG_RAPAMYCIN_RESPONSE_UP	1.47444	0.00567108	0.0966498
LI_PROSTATE_CANCER_EPIGENETIC	1.47407	0.033195	0.0967142
HASLINGER_B_CLL_WITH_CHROMOSOME_12_TRISOMY	1.47404	0.0487805	0.0965412
MARZEC_IL2_SIGNALING_UP	1.47336	0.013834	0.096836
LEE_LIVER_CANCER_E2F1_UP	1.4729	0.027957	0.0969988
HELLER_HDAC_TARGETS_SILENCED_BY_METHYLATION_DN	1.47259	0.00191939	0.0970241
WONG_PROTEASOME_GENE_MODULE	1.47114	0.0371901	0.0978143
GEISS_RESPONSE_TO_DSRNA_DN	1.47063	0.0645833	0.0980304
RORIE_TARGETS_OF_EWSR1_FLI1_FUSION_DN	1.46979	0.0388548	0.0984399
LU_AGING_BRAIN_DN	1.46905	0.0100604	0.0988172
BLOOD_MODULE-3.3_INFLAMMATION-2	1.46863	0.00372439	0.0585623
PHONG_TNF_RESPONSE_VIA_P38_PARTIAL	1.46796	0.00782779	0.0994336
BLALOCK_ALZHEIMERS_DISEASE_INCIPIENT_DN	1.46763	0.0101626	0.0994471
BARIS_THYROID_CANCER_DN	1.46725	0.027027	0.0995732
TARTE_PLASMA_CELL_VS_PLASMABLAST_UP	1.46599	0	0.0999945
NFKB_CHIPCHIP_YOUNG_5FACTORS	1.45769	0.0609037	0.0624276
BCL6_TARGETS_CHIPCHIP	1.45321	0.00194175	0.0635652
DENDRITIC_CELL_CD16POS_BLOOD	1.45038	0.0354906	0.064016
HEMATOPOIETIC_NODE1659	1.4498	0.0639535	0.0636855
GLUTAMINE_STARVE_DOWN	1.44277	0.00196464	0.0663996
HALLMARK_PEROXISOME	1.42936	0.0206767	0.0368891
T_NK_NODE1604	1.42419	0.0728745	0.0751278
IRF4_TARGET_MM_PLASMA_CELL_GT_B_CELL	1.4205	0.0387755	0.0763217
TCELL_PIREP4X_FESKE_FIG6	1.41503	0.0454545	0.0785662
HALLMARK_COAGULATION	1.41446	0.0120968	0.0403472
LUNG_NODE3969	1.41117	0.0927835	0.0798488
MYC_OVEREXPRESSION_1.5X_UP	1.38843	0.0311891	0.0926342
THYMIC_PROGENITOR_TCELL_GT_THYMIC_DP_TCELL	1.38813	0.0953347	0.0918612
JAK_IL10_LY10_UP	1.38557	0.0720165	0.0925309
RESTING_BLOOD_NK_CELL_GNF	1.38106	0.056338	0.0942934
RESTING_DENDRITIC_CELL_GNF	1.37597	0.0357853	0.096674
RESTING_MONOCYTE_GNF	1.37522	0.0166667	0.0960726
HALLMARK_IL6_JAK_STAT3_SIGNALING	1.36171	0.0528455	0.0627256
HALLMARK_WNT_BETA_CATENIN_SIGNALING	1.35986	0.086444	0.0601657
HALLMARK_NOTCH_SIGNALING	1.35923	0.0914397	0.0576198
HALLMARK_APICAL_SURFACE	1.33681	0.0874752	0.0675922
HALLMARK_APICAL_JUNCTION	1.32551	0.0233918	0.0700284
HALLMARK_XENOBIOTIC_METABOLISM	1.30866	0.0342857	0.0765971
HALLMARK_UV_RESPONSE_DN	1.29175	0.0500963	0.0834691
HALLMARK_ANGIOGENESIS	1.26156	0.146998	0.099879
HALLMARK_GLYCOLYSIS	1.2601	0.0498084	0.097451
Table S4B
NAME	NES	NOM p-val	FDR q-val
CB_1P5_UP	-2.15488	0	0
LEE_EARLY_T_LYMPHOCYTE_UP	-2.1074	0	0
PROLIFERATION_NODE1618	-2.03913	0	0.000320513
WHITEFORD_PEDIATRIC_CANCER_MARKERS	-2.02192	0	0.00367189
CB_1P33_UP	-2.00983	0	0.000213675
TANG_SENESCENCE_TP53_TARGETS_DN	-1.96773	0	0.012463
PUJANA_BRCA_CENTERED_NETWORK	-1.95176	0	0.0120725
REACTOME_AMINO_ACID_SYNTHESIS_AND_INTERCONVERSION_TRANSAMINATION	-1.92491	0	0.0444302
REICHERT_MITOSIS_LIN9_TARGETS	-1.91654	0	0.0193187
MITSIADES_RESPONSE_TO_APLIDIN_DN	-1.9123	0	0.0170675
NAKAYAMA_SOFT_TISSUE_TUMORS_PCA2_UP	-1.91129	0	0.0151481
GAUSSMANN_MLL_AF4_FUSION_TARGETS_C_DN	-1.90761	0	0.0142634
PUJANA_XPRSS_INT_NETWORK	-1.90676	0	0.0128401
BLUM_RESPONSE_TO_SALIRASIB_DN	-1.87628	0	0.0212958
XU_HGF_SIGNALING_NOT_VIA_AKT1_48HR_DN	-1.87181	0.00189036	0.0214219
GERMINAL_CENTER_B_CELL_DLBCL_SURVIVAL_PREDICTOR	-1.86845	0	0.00436693
GOLUB_ALL_VS_AML_UP	-1.8665	0.00389864	0.0216371
NIKOLSKY_BREAST_CANCER_8P12_P11_AMPLICON	-1.85558	0.0020284	0.0252678
PUJANA_BREAST_CANCER_WITH_BRCA1_MUTATED_UP	-1.84437	0	0.0283066
MCL_PROLIFERATION_SURVIVAL	-1.8363	0.003861	0.00587755
KAMMINGA_EZH2_TARGETS	-1.83473	0.00211864	0.0309605
YU_MYC_TARGETS_UP	-1.83034	0.00201613	0.0311214
MISSIAGLIA_REGULATED_BY_METHYLATION_DN	-1.8296	0	0.0293767
CHANG_CYCLING_GENES	-1.82881	0	0.0280299
AFFAR_YY1_TARGETS_DN	-1.82844	0	0.0267447
RHEIN_ALL_GLUCOCORTICOID_THERAPY_DN	-1.82554	0	0.026354
PUJANA_BRCA2_PCC_NETWORK	-1.82476	0	0.0255867
KANG_DOXORUBICIN_RESISTANCE_UP	-1.80481	0	0.0325757
HUMMEL_BURKITTS_LYMPHOMA_UP	-1.79772	0.00199601	0.034534
KONG_E2F3_TARGETS	-1.79387	0	0.0350646
CHIANG_LIVER_CANCER_SUBCLASS_PROLIFERATION_UP	-1.78463	0	0.038521
FURUKAWA_DUSP6_TARGETS_PCI35_DN	-1.77975	0	0.0400031
FERRANDO_LYL1_NEIGHBORS	-1.7797	0	0.0385745
HADDAD_B_LYMPHOCYTE_PROGENITOR	-1.77534	0	0.0397963
LY_AGING_MIDDLE_DN	-1.76876	0.00188324	0.0419107
WU_APOPTOSIS_BY_CDKN1A_VIA_TP53	-1.76851	0	0.040731
REN_BOUND_BY_E2F	-1.76394	0.00385356	0.042246
EGUCHI_CELL_CYCLE_RB1_TARGETS	-1.76335	0.00198413	0.041246
THYMIC_DP_TCELL_GT_THYMIC_SP_CD4+TCELL	-1.75399	0	0.0159373
BASSO_CD40_SIGNALING_DN	-1.75286	0	0.0461787
FIRESTEIN_CTNNB1_PATHWAY	-1.75275	0.00398406	0.0448836
FERRANDO_HOX11_NEIGHBORS	-1.7524	0.00396825	0.0437905
ASTON_MAJOR_DEPRESSIVE_DISORDER_UP	-1.75014	0.00761905	0.0439126
CAIRO_PML_TARGETS_BOUND_BY_MYC_UP	-1.7491	0.00852879	0.0432799
ZHOU_CELL_CYCLE_GENES_IN_IR_RESPONSE_24HR	-1.74828	0	0.0425659
FOURNIER_ACINAR_DEVELOPMENT_EARLY_UP	-1.74658	0	0.0424512
ODONNELL_TARGETS_OF_MYC_AND_TFRC_DN	-1.74367	0	0.0433466
WHITFIELD_CELL_CYCLE_LITERATURE	-1.74142	0	0.0436618
GINESTIER_BREAST_CANCER_ZNF217_AMPLIFIED_UP	-1.73919	0.00200401	0.0439093
DAZARD_RESPONSE_TO_UV_NHEK_DN	-1.73154	0	0.0471068
SONG_TARGETS_OF_IE86_CMV_PROTEIN	-1.72904	0.0019084	0.0474961
WHITFIELD_CELL_CYCLE_G1_S	-1.72637	0	0.0478602
ROSTY_CERVICAL_CANCER_PROLIFERATION_CLUSTER	-1.72376	0	0.0480889
GROSS_HYPOXIA_VIA_ELK3_ONLY_UP	-1.72132	0.00383142	0.0484814
HORIUCHI_WTAP_TARGETS_DN	-1.71327	0	0.0520385
HOSHIDA_LIVER_CANCER_LATE_RECURRENCE_DN	-1.71252	0	0.0514553
DAZARD_UV_RESPONSE_CLUSTER_G6	-1.71179	0	0.0508385
CHIANG_LIVER_CANCER_SUBCLASS_INTERFERON_DN	-1.70766	0	0.0524715
ODONNELL_TFRC_TARGETS_DN	-1.70365	0	0.0537454
PETROVA_PROX1_TARGETS_UP	-1.68976	0.00381679	0.0619089
KANNAN_TP53_TARGETS_DN	-1.68736	0.00200401	0.0623614
ZHOU_CELL_CYCLE_GENES_IN_IR_RESPONSE_6HR	-1.68227	0	0.0650058
GAJATE_RESPONSE_TO_TRABECTEDIN_DN	-1.68141	0.00961539	0.0644595
NAGASHIMA_NRG1_SIGNALING_DN	-1.68089	0.00198807	0.06392
CELL_CYCLE_LIU	-1.6768	0	0.0383323
ZHANG_TLX_TARGETS_36HR_DN	-1.67655	0.00195695	0.066086
MARIADASON_RESPONSE_TO_BUTYRATE_CURCUMIN_SULINDAC_TSA_8	-1.67334	0.0132075	0.0673891
ZHAN_MULTIPLE_MYELOMA_PR_UP	-1.66408	0.00811359	0.0737713
CD40_DOWNREGULATED_BURKITT_LYMPHOMA	-1.66326	0.00595238	0.039245
MIYAGAWA_TARGETS_OF_EWSR1_ETS_FUSIONS_DN	-1.65898	0	0.0770132
KOBAYASHI_EGFR_SIGNALING_24HR_DN	-1.65849	0	0.076233
HALLMARK_TGF_BETA_SIGNALING	-1.65828	0.00201207	0.0253154
WANG_RESPONSE_TO_GSK3_INHIBITOR_SB216763_DN	-1.65827	0	0.0752662
BREUHAHN_GROWTH_FACTOR_SIGNALING_IN_LIVER_CANCER	-1.65647	0.0211538	0.0753019
ALONSO_METASTASIS_EMT_UP	-1.65414	0.00398406	0.0759502
JOHNSTONE_PARVB_TARGETS_2_DN	-1.65237	0	0.0762749
ZIRN_TRETINOIN_RESPONSE_UP	-1.64118	0.00982318	0.0846093
LU_EZH2_TARGETS_DN	-1.64053	0	0.0840526
HALLMARK_E2F_TARGETS	-1.63942	0	0.014434
DUTERTRE_ESTRADIOL_RESPONSE_24HR_UP	-1.63823	0	0.0848154
DING_LUNG_CANCER_EXPRESSION_BY_COPY_NUMBER	-1.63811	0.00194553	0.0837504
GRAHAM_NORMAL_QUIESCENT_VS_NORMAL_DIVIDING_DN	-1.63279	0	0.0879222
BREDEMEYER_RAG_SIGNALING_VIA_ATM_NOT_VIA_NFKB_UP	-1.62995	0.0144628	0.089006
VANTVEER_BREAST_CANCER_METASTASIS_DN	-1.62807	0.00203252	0.0894318
XU_HGF_TARGETS_INDUCED_BY_AKT1_48HR_DN	-1.62746	0.0127273	0.0887874
COLDREN_GEFITINIB_RESISTANCE_UP	-1.62491	0.00411523	0.0897475
KAUFFMANN_MELANOMA_RELAPSE_UP	-1.62442	0.0118343	0.0889325
FLOTHO_PEDIATRIC_ALL_THERAPY_RESPONSE_UP	-1.61913	0.00201613	0.0927097
GC_B_CELL_BL_EQUAL_DLBCL	-1.61871	0	0.0569501
YANG_BREAST_CANCER_ESR1_DN	-1.61769	0.0146444	0.0927679
ZHENG_FOXP3_TARGETS_IN_T_LYMPHOCYTE_DN	-1.61701	0.00392157	0.0921399
SHIPP_DLBCL_CURED_VS_FATAL_UP	-1.61464	0.00795229	0.0930523
KANG_DOXORUBICIN_RESISTANCE_DN	-1.61096	0.023301	0.0950208
ZHANG_TLX_TARGETS_DN	-1.60869	0.00395257	0.0958581
GARGALOVIC_RESPONSE_TO_OXIDIZED_PHOSPHOLIPIDS_TURQUOISE_DN	-1.60839	0.0104384	0.0949929
HALLMARK_G2M_CHECKPOINT	-1.60509	0	0.0141847
JAATINEN_HEMATOPOIETIC_STEM_CELL_UP	-1.60351	0	0.0984648
GENTILE_UV_RESPONSE_CLUSTER_D9	-1.60339	0.0120482	0.0974187
ZEMBUTSU_SENSITIVITY_TO_CYCLOPHOSPHAMIDE	-1.60236	0.0218688	0.0972227
FUJII_YBX1_TARGETS_DN	-1.59895	0	0.0996345
GROSS_HIF1A_TARGETS_DN	-1.59813	0.0198807	0.0993203
BLOOD_MODULE-1.3_B_CELLS	-1.58483	0.00391389	0.0716126
GERMINAL_CENTER_BCELL_DLBCL	-1.56382	0.00959693	0.0792095
GC_B_CELL_U133PLUS	-1.5373	0	0.0909063
Table S4C
probe	Gene_symbol	P	log ratio
ILMN_1704537	PHGDH	0.00166317	-2.02855
ILMN_1752899	BCL11A	0.0483509	-1.25578
ILMN_1684836	AKAP12	0.001353	-1.09598
ILMN_1815745	SOX4	0.0430286	-1.01261
ILMN_1741727	QPCT	0.0430286	-0.984336
ILMN_1700257	C4orf32	0.001353	-0.970326
ILMN_1893633	LOC439949	0.00357591	-0.954742
ILMN_1790843	NLRP11	0.0337899	-0.935527
ILMN_1710124	CMTM8	0.0262233	-0.793878
ILMN_1723962	LXN	0.0381864	-0.790948
ILMN_1749009	REXO2	0.00709359	-0.782287
ILMN_1692938	PSAT1	0.0200983	-0.762846
ILMN_1710075	FAM89A	0.00832597	-0.756308
ILMN_1755383	LRRC1	0.0298135	-0.728939
ILMN_1804277	SPRED1	0.011335	-0.718565
ILMN_2148796	MND1	0.00508281	-0.690522
ILMN_1708728	H2AFJ	0.0152003	-0.673565
ILMN_1662086	GUCA1A	0.0200983	-0.672994
ILMN_1802808		0.0175094	-0.666292
ILMN_3227023		0.0430286	-0.660951
ILMN_1749410	PKP4	0.0483509	-0.643969
ILMN_1763433	TRIM9	0.0337899	-0.636752
ILMN_1733318	TEX9	0.0337899	-0.628917
ILMN_1653039	NA	0.0430286	-0.626365
ILMN_3233229	SNHG7	0.0131509	-0.624288
ILMN_2152581	STK38	0.0483509	-0.616105
ILMN_1707434		0.0175094	-0.614469
ILMN_2413278	RPL13	0.0381864	-0.613799
ILMN_2233539	SLC39A8	0.0381864	-0.606554
ILMN_1730101	GSPT2	0.0381864	-0.591493
ILMN_1671906	MND1	0.0175094	-0.591408
ILMN_1772876	ZNF395	0.0483509	-0.588718
ILMN_1656399	TCEAL8	0.0175094	-0.586561
ILMN_1715969	SLC25A37	0.00508281	-0.581827
ILMN_1725188	PRKCI	0.00033513	-0.562838
ILMN_2352023	DSTYK	0.00508281	-0.551989
ILMN_2223922	AGTPBP1	0.0175094	-0.550559
ILMN_2045419	BNIP3L	0.0381864	-0.549195
ILMN_2336781	SOD2	0.0131509	-0.537723
ILMN_1761131	ECI2	0.0337899	-0.530527
ILMN_1680888	EML6	0.0337899	-0.529719
ILMN_1776327		0.0483509	-0.523502
ILMN_1700896	SAP30	0.0200983	-0.521303
ILMN_1675406	PPAPDC1B	0.0175094	-0.51904
ILMN_2279339	WTAP	0.000552014	-0.514867
ILMN_3239263	RPL23AP53	0.0262233	-0.514659
ILMN_1788961	PPP2R2A	0.0337899	-0.513484
ILMN_1692790	ITGB3BP	0.0175094	-0.510964
ILMN_2351548	FAIM	0.0381864	-0.504476
ILMN_1676631	CCNO	0.0262233	-0.494866
ILMN_1872457		0.011335	-0.493946
ILMN_2400326	DYRK3	0.00601689	-0.493282
ILMN_1704385		0.022995	-0.491339
ILMN_1712687	PAK2	0.0381864	-0.489808
ILMN_2111229	BZRAP1	0.00508281	-0.485423
ILMN_1785661	FAM108B1	0.0175094	-0.484774
ILMN_1735584	ST8SIA5	0.00832597	-0.482692
ILMN_1703408	FZD3	0.011335	-0.480643
ILMN_2042595	PCM1	0.0131509	-0.479307
ILMN_1734880	RPL23AP53	0.0152003	-0.476385
ILMN_2386100	BUB3	0.00709359	-0.470731
ILMN_1735156	SLC4A11	0.00297695	-0.470408
ILMN_1779374	AMMECR1	0.0430286	-0.469111
ILMN_1738095	PER2	0.00427291	-0.465032
ILMN_1696127	KIAA0240	0.0381864	-0.464704
ILMN_1722524	GALNT14	0.011335	-0.458984
ILMN_1720059	HMBOX1	0.0200983	-0.458167
ILMN_1658302	PIAS2	0.011335	-0.45502
ILMN_1743352	TBCC	0.0200983	-0.444987
ILMN_1804611	C12orf23	0.000194898	-0.444932
ILMN_1664602		0.000146174	-0.442049
ILMN_1813490	FSD1	0.0430286	-0.441382
ILMN_2069821	C4orf32	0.000699376	-0.441192
ILMN_1803476	KCTD20	0.00357591	-0.438531
ILMN_3235326	LOC388796	0.0483509	-0.435225
ILMN_2388070	TMEM44	0.0262233	-0.433732
ILMN_1730940	KLHDC3	0.0337899	-0.429858
ILMN_2126423	ZNF480	0.0262233	-0.424403
ILMN_1690342	LTA4H	0.0337899	-0.424326
ILMN_1739885	SLC41A3	0.00297695	-0.423618
ILMN_2115135	MSMP	0.0131509	-0.421473
ILMN_1800889	FIG4	0.0337899	-0.420788
ILMN_1712532	CARD9	0.00832597	-0.419035
ILMN_3265237		0.011335	-0.411081
ILMN_3245625	RFX7	0.0381864	-0.408619
ILMN_1793578	ZFP37	0.0381864	-0.408169
ILMN_2151488	RMI1	0.0381864	-0.40768
ILMN_1658221	POLH	0.00203039	-0.406458
ILMN_1674710		0.00508281	-0.406059
ILMN_1814629	ZC3H12B	0.0337899	-0.404211
ILMN_1753241	SNTA1	0.0430286	-0.393066
ILMN_3235312	LOC92659	0.00601689	-0.391802
ILMN_1682694	VMA21	0.0131509	-0.389497
ILMN_1731922	RAI1	0.0483509	-0.386463
ILMN_2356111	SLC41A3	0.00357591	-0.385516
ILMN_1709484	BLM	0.0381864	-0.384974
ILMN_1669696	ZNF792	0.0381864	-0.384292
ILMN_2067269	RECK	0.0430286	-0.38122
ILMN_3239460	OAZ2	0.022995	-0.380903
ILMN_1764629	SLC39A14	0.0337899	-0.3805
ILMN_1742147	UBL4A	0.0131509	-0.380287
ILMN_2123567	SENP2	0.0337899	-0.380114
ILMN_3247256		0.00427291	-0.378995
ILMN_1728965	C11orf57	0.000552014	-0.378108
ILMN_1755234	SSH3	0.00832597	-0.378047
ILMN_2246510	TSC1	0.0430286	-0.376451
ILMN_1653612	KCTD9	0.0430286	-0.376037
ILMN_1813277	SUPT3H	0.0262233	-0.374129
ILMN_1709891	USP34	0.0298135	-0.371335
ILMN_2400322	DYRK3	0.00601689	-0.369109
ILMN_2103480	ZNF320	0.011335	-0.368736
ILMN_3288218	RPS7	0.00832597	-0.368448
ILMN_2223130	SMARCA5	0.00297695	-0.365388
ILMN_1788462	AMD1	0.0430286	-0.365241
ILMN_2062524	RBBP4	0.0152003	-0.361692
ILMN_1804789	KIAA1967	0.0483509	-0.361297
ILMN_3304887	DAB1	0.0381864	-0.358272
ILMN_1726434	UNC45A	0.0430286	-0.356712
ILMN_1740842	SALL2	0.0381864	-0.355935
ILMN_1661376	GRIK2	0.0337899	-0.351612
ILMN_3243899	C8orf83	0.0200983	-0.351437
ILMN_2119421		0.0175094	-0.349819
ILMN_1672565	RG9MTD1	0.0298135	-0.346913
ILMN_1672128	ATF4	0.0381864	-0.346494
ILMN_1663664	MRPS10	0.0430286	-0.343458
ILMN_1851492		0.00357591	-0.342611
ILMN_2101025	ZNF75D	0.0430286	-0.33871
ILMN_3291413		0.022995	-0.338311
ILMN_1689389	SF3B5	0.0337899	-0.338173
ILMN_2055700	SLBP	0.0337899	-0.333733
ILMN_1756079	WASF1	0.0337899	-0.332948
ILMN_3267800	C14orf105	0.0337899	-0.330274
ILMN_1794150	NA	0.00246594	-0.330226
ILMN_1700584	IER2	0.0200983	-0.330103
ILMN_1843949		0.0381864	-0.32637
ILMN_1776213	RGMB	0.00203039	-0.326313
ILMN_1669905	DCP2	0.00203039	-0.325755
ILMN_1739259	UBE4A	0.0262233	-0.324912
ILMN_1736539	ALDH1L2	0.00203039	-0.324796
ILMN_1777139	MAK16	0.0483509	-0.323347
ILMN_1746699	SGOL2	0.0200983	-0.323181
ILMN_3240321	AEN	0.0430286	-0.321805
ILMN_3285162	MAML2	0.0337899	-0.321713
ILMN_1815184	ASPM	0.0337899	-0.320566
ILMN_1834842		0.0175094	-0.319294
ILMN_1710962	TMEM97	0.0298135	-0.319161
ILMN_1746919	SHPK	0.0131509	-0.317453
ILMN_3236373	MSL2	0.00508281	-0.316805
ILMN_2143487	TAF1B	0.0337899	-0.316501
ILMN_3229038	LOC442132	0.00109393	-0.315737
ILMN_1749253	TUBD1	0.00357591	-0.313239
ILMN_1668683	MLL	0.00203039	-0.312888
ILMN_1774990	C16orf13	0.0131509	-0.312609
ILMN_2409220	HMMR	0.0175094	-0.311683
ILMN_1689868	TMEM80	0.022995	-0.31043
ILMN_1784113	NAT14	0.00973423	-0.307247
ILMN_1795856		0.0175094	-0.305096
ILMN_1784428	MGC57346	0.0131509	-0.30495
ILMN_1708095	PANK2	0.0381864	-0.303458
ILMN_2137536	ZZZ3	0.0298135	-0.30182
ILMN_1810628	PRUNE2	0.0381864	-0.301657
ILMN_1809750	TDRD1	0.0430286	-0.301087
ILMN_1759628	ATP1B3	0.0262233	-0.300501
ILMN_1781102	METTL21D	0.00709359	0.300605
ILMN_1696590	CHST4	0.011335	0.304131
ILMN_1768784	PSMC2	0.0381864	0.30515
ILMN_1751431	WIBG	0.0483509	0.306045
ILMN_2079004	MDH2	0.0200983	0.306514
ILMN_2359800	MS4A6A	0.0131509	0.308046
ILMN_1664330	CEACAM1	0.00297695	0.308311
ILMN_1674866	TADA3	0.0430286	0.308584
ILMN_2396948	PSMC3IP	0.0337899	0.314486
ILMN_1784655	TLCD1	0.0298135	0.315781
ILMN_1758523	ABCA3	0.0381864	0.316267
ILMN_1775759	NRAS	0.0298135	0.316552
ILMN_1751075	SETD4	0.00508281	0.316999
ILMN_1781999	ABCF2	0.0483509	0.317026
ILMN_1662359		0.0337899	0.318197
ILMN_2332558	ARL5A	0.0152003	0.319756
ILMN_1759008	ZNF689	0.0298135	0.32028
ILMN_1656938	SLC37A2	0.0483509	0.32043
ILMN_1688526	ARL5A	0.0152003	0.321126
ILMN_3277872	BMS1	0.0337899	0.321748
ILMN_1659854	PRPF40A	0.0200983	0.322015
ILMN_1666932	FCGR2A	0.00832597	0.322388
ILMN_1674811	OASL	0.0175094	0.322961
ILMN_1715607	CHMP4A	0.0131509	0.323769
ILMN_2390919	FBLN2	0.00832597	0.324051
ILMN_1787576	CLCNKA	0.0152003	0.324794
ILMN_1789944	PGAM5	0.0430286	0.325078
ILMN_1720235	ADSSL1	0.022995	0.325507
ILMN_1747162	DDX47	0.0337899	0.326985
ILMN_1672504	PDXK	0.0483509	0.328645
ILMN_1776777	ADAR	0.022995	0.32957
ILMN_1692026	SUV420H1	0.0298135	0.330175
ILMN_3265343	ZMYM6NB	0.0200983	0.330641
ILMN_1662232	DCTN2	0.00973423	0.33133
ILMN_1694147	PUS3	0.0381864	0.332847
ILMN_1798189	COX7C	0.0131509	0.334489
ILMN_2368575		0.022995	0.335729
ILMN_3251545	CHMP5	0.022995	0.338977
ILMN_2393763	ARPC4	0.0175094	0.339585
ILMN_1707783	CCDC72	0.0152003	0.342217
ILMN_1725726	DHRS2	0.00508281	0.343463
ILMN_1791728	SLC25A25	0.0430286	0.344492
ILMN_1733103	LINC00174	0.0152003	0.344705
ILMN_1766762	DYNLRB1	0.00109393	0.349312
ILMN_1734833	NBN	0.0131509	0.349633
ILMN_3242357	BMS1P4	0.000432579	0.352367
ILMN_1738656	GLOD4	0.0337899	0.352524
ILMN_1789005	ATP6V0C	0.0337899	0.353061
ILMN_1681777	SHROOM2	0.00427291	0.354682
ILMN_1784641	NDUFA3	0.0152003	0.357632
ILMN_1712888	HSPH1	0.0381864	0.358294
ILMN_1772132	ATP5B	0.00973423	0.359659
ILMN_3307757	C17orf87	0.0152003	0.361438
ILMN_1676588	CEPT1	0.0337899	0.362157
ILMN_2326737	PPIE	0.022995	0.362429
ILMN_1721046	PTMS	0.0483509	0.364824
ILMN_2364072	CLCNKA	0.0175094	0.367105
ILMN_1726222	FLOT2	0.0200983	0.368554
ILMN_1712357	HNRNPK	0.022995	0.369046
ILMN_2052598	ARMC10	0.0262233	0.369583
ILMN_2374683	PTPN13	0.0430286	0.37138
ILMN_1690907	CCR6	0.0175094	0.373855
ILMN_1655414	TNFSF14	0.00973423	0.376815
ILMN_1745329	PRR14	0.0483509	0.376929
ILMN_1794505	SHFM1	0.0298135	0.377839
ILMN_1703108	UBE2L6	0.0262233	0.378371
ILMN_1778734	FAN1	0.0337899	0.379156
ILMN_1794011	CHST2	0.011335	0.380427
ILMN_2236625	UTS2	0.011335	0.380621
ILMN_3179371	HNRNPK	0.0430286	0.381526
ILMN_2164242	UBE2F	0.0298135	0.385397
ILMN_2043728	ZNF341	0.0483509	0.385847
ILMN_2310621	ATP5J2	0.011335	0.385909
ILMN_2412101	PRKAG1	0.00508281	0.387394
ILMN_1751984	PRKAG1	0.00427291	0.387484
ILMN_1760922	GIT2	0.0337899	0.388488
ILMN_2038777	ACTB	0.0298135	0.389408
ILMN_1680246	MAT2B	0.00246594	0.395399
ILMN_2363250	BCL2	0.0430286	0.397015
ILMN_1809013		0.0262233	0.398527
ILMN_1774602	FBLN2	0.0262233	0.40274
ILMN_3260618	APIP	0.00832597	0.405247
ILMN_1812392	TMSB10	0.0483509	0.411575
ILMN_2262901	RUFY3	0.0337899	0.412801
ILMN_1772131	IL1R2	0.0483509	0.412936
ILMN_1792110	C10orf76	0.0298135	0.413907
ILMN_1763144	NEU1	0.0152003	0.414443
ILMN_1681984	GALNT10	0.00973423	0.416913
ILMN_1660973	GAD1	0.0200983	0.417812
ILMN_1864989		0.011335	0.418455
ILMN_1771966	BCCIP	0.0298135	0.422938
ILMN_2360229	MAPKAP1	0.0337899	0.424023
ILMN_2184373	IL8	0.0298135	0.426424
ILMN_1800131	NA	0.0381864	0.430162
ILMN_3235928	CYTIP	0.0152003	0.433217
ILMN_2307883	ATP5J2	0.011335	0.436217
ILMN_2349061	IRF7	0.022995	0.438363
ILMN_1803745	SUOX	0.0298135	0.443426
ILMN_1762594	NOD2	0.00427291	0.444484
ILMN_1804174	FCGR2B	0.0298135	0.444713
ILMN_1715603	IL23A	0.011335	0.447013
ILMN_1723874	MRPS6	0.0430286	0.447645
ILMN_1672496	DNAJA1	0.0262233	0.448367
ILMN_2234016	FTH1	0.0483509	0.452039
ILMN_1764964	IFNGR2	0.0131509	0.463387
ILMN_2267787	HPS1	0.00709359	0.464161
ILMN_3176403	FTH1	0.0337899	0.465519
ILMN_1791057	IFNAR2	0.0381864	0.465859
ILMN_1813139	ANKDD1A	0.0152003	0.467055
ILMN_2094166	CHMP5	0.0381864	0.468975
ILMN_1684497	PYROXD2	0.0262233	0.469397
ILMN_1725241	GSTK1	0.00709359	0.469767
ILMN_1678652	TCTN3	0.0337899	0.471183
ILMN_2222688	TMSB4X	0.0298135	0.472925
ILMN_1793118	TAX1BP1	0.0175094	0.474241
ILMN_1651347	SERTAD2	0.0152003	0.480331
ILMN_1790461	C6orf125	0.0298135	0.480369
ILMN_1664543	IFIT3	0.00973423	0.482838
ILMN_1705297	MYBPH	0.00709359	0.484197
ILMN_1721106	C14orf159	0.0337899	0.487978
ILMN_1728011	NLGN4X	0.0200983	0.48858
ILMN_1653443	CDK2	0.0200983	0.488602
ILMN_2388701	ST3GAL5	0.0381864	0.488883
ILMN_1668374	ITGB5	0.00246594	0.490262
ILMN_1767470	SCPEP1	0.0298135	0.496766
ILMN_1750101	S100A11	0.022995	0.49826
ILMN_1748281	MAPK10	0.0200983	0.498781
ILMN_1786612	PSME2	0.022995	0.506278
ILMN_1791792	C12orf5	0.0483509	0.515528
ILMN_1777296	ACTB	0.00709359	0.517885
ILMN_1699665	CLIC6	0.0337899	0.519844
ILMN_1794707	ATHL1	0.0337899	0.522223
ILMN_1752582	RAB5B	0.001353	0.529619
ILMN_1788203	HEY1	0.0337899	0.530558
ILMN_1744725	BTBD6	0.0483509	0.533054
ILMN_1674097	GAGE2B	0.0483509	0.541897
ILMN_2170813	LAMP3	0.022995	0.542382
ILMN_2374770	TAX1BP1	0.0131509	0.54381
ILMN_1680591	RTKN	0.0483509	0.556848
ILMN_1795507	ABCA6	0.0337899	0.559577
ILMN_2195385		0.011335	0.56731
ILMN_2187718	COX17	0.0131509	0.570877
ILMN_1719611		0.0430286	0.571685
ILMN_1718558	PARP12	0.0381864	0.579874
ILMN_1800951	ATXN1	0.00297695	0.592936
ILMN_1777261	FAM3C	0.00601689	0.593956
ILMN_1811909		0.00601689	0.594694
ILMN_1665559	CDK2	0.0262233	0.600713
ILMN_1806165		0.022995	0.60369
ILMN_1657760	SYT17	0.0483509	0.618646
ILMN_1671818	UTS2	0.00832597	0.618953
ILMN_1656378	NMT2	0.0430286	0.630766
ILMN_1660923	NA	0.00973423	0.631197
ILMN_2337655	WARS	0.0337899	0.631803
ILMN_1713496	ST3GAL5	0.0483509	0.635827
ILMN_2371724	CEACAM1	0.00203039	0.636459
ILMN_1739428	IFIT2	0.0131509	0.637819
ILMN_1656057	PLAU	0.0430286	0.639565
ILMN_2327860	MAL	0.0337899	0.650674
ILMN_1653828	CHFR	0.0483509	0.657358
ILMN_1814305	SAMD9	0.0262233	0.663736
ILMN_3241234	S100A11	0.0381864	0.664543
ILMN_3236036	LOC283663	0.0298135	0.666162
ILMN_1732831	CHST7	0.0337899	0.667926
ILMN_1690844	DNAJB6	0.00166317	0.668969
ILMN_2368773	FAM3C	0.00508281	0.676085
ILMN_1803277	MVP	0.0381864	0.695081
ILMN_1674285	NQO2	0.0298135	0.697068
ILMN_1688152	IL27RA	0.0430286	0.703648
ILMN_3288717		0.0430286	0.708165
ILMN_1690105	STAT1	0.0175094	0.734117
ILMN_1814998	POTEKP	0.00203039	0.738182
ILMN_1808238	RBPMS2	0.022995	0.741227
ILMN_1773245		0.0131509	0.742206
ILMN_2058782	IFI27	0.000194898	0.751371
ILMN_2153332	ATXN1	0.0298135	0.767953
ILMN_1798181	IRF7	0.0200983	0.775492
ILMN_1745471	IRF9	0.00973423	0.782117
ILMN_1660027	FCGR2B	0.0430286	0.788296
ILMN_2402416	DNAJB6	7.84347e-05	0.803441
ILMN_1777325	STAT1	0.022995	0.808923
ILMN_1737514	KYNU	0.0298135	0.847723
ILMN_1782560	CD86	0.022995	0.867166
ILMN_1691364	STAT1	0.0200983	0.953572
ILMN_1760062	IFI44	0.0381864	0.967276
ILMN_1741356	PRICKLE1	0.00709359	0.969353
ILMN_1716815	CEACAM1	0.00297695	0.985443
ILMN_2159694		0.0175094	0.98897
ILMN_2388547	EPSTI1	0.0381864	1.0434
ILMN_2368530		0.0152003	1.09205
ILMN_1746517	KYNU	0.0381864	1.10227
ILMN_1656920	CRIP1	0.0262233	1.14923
ILMN_1765446	EMP3	0.0152003	1.21823
ILMN_1656501	DUSP5	0.0175094	1.26328
ILMN_2218856		0.00601689	1.27976
ILMN_1800354	CST3	0.00832597	1.30764
ILMN_1747355		0.0298135	1.40594
ILMN_1716276		0.00203039	1.43833
ILMN_2100209		0.000699376	1.53214
ILMN_1671509	CCL3	0.0131509	1.66074
ILMN_3235832		0.00166317	1.71794
ILMN_1662358	MX1	0.0262233	1.7385
ILMN_2105573	CCL3L3,CCL3L1	0.00709359	2.01638
Table S4D
NAME	GENE_TITLE	SCORE
CCL3L3	chemokine (C-C motif) ligand 3-like 3	0.568044
LOC728835	-	0.553627
CCL4L1	chemokine (C-C motif) ligand 4-like 1	0.494789
CCL3	chemokine (C-C motif) ligand 3	0.479468
CCL4L2	chemokine (C-C motif) ligand 4-like 2	0.473406
MX1	myxovirus (influenza virus) resistance 1, interferon-inducible protein p78 (mouse)	0.467029
CST3	cystatin C (amyloid angiopathy and cerebral hemorrhage)	0.448144
CCL3L1	chemokine (C-C motif) ligand 3-like 1	0.441124
DUSP5	dual specificity phosphatase 5	0.376847
TMPRSS3	transmembrane protease, serine 3	0.374786
IL32	interleukin 32	0.368768
LOC731682	-	0.368683
CHI3L2	chitinase 3-like 2	0.368449
DNASE1L3	deoxyribonuclease I-like 3	0.367624
HLA-A29.1	null	0.364171
ABCA6	ATP-binding cassette, sub-family A (ABC1), member 6	0.357765
LHX2	LIM homeobox 2	0.349427
EMP3	epithelial membrane protein 3	0.348168
IFI44	interferon-induced protein 44	0.333533
CEACAM1	carcinoembryonic antigen-related cell adhesion molecule 1 (biliary glycoprotein)	0.324135
IL13RA1	interleukin 13 receptor, alpha 1	0.32265
KYNU	kynureninase (L-kynurenine hydrolase)	0.322642
PRICKLE1	prickle homolog 1 (Drosophila)	0.320074
S100A4	S100 calcium binding protein A4	0.318644
EPSTI1	epithelial stromal interaction 1 (breast)	0.315068
PLAC8	placenta-specific 8	0.308769
EBI2	Epstein-Barr virus induced gene 2 (lymphocyte-specific G protein-coupled receptor)	0.298887
IFI44L	interferon-induced protein 44-like	0.291421
CCND1	cyclin D1	0.289396
XIST	X (inactive)-specific transcript	0.288264
PTPN6	protein tyrosine phosphatase, non-receptor type 6	0.282993
MX2	myxovirus (influenza virus) resistance 2 (mouse)	0.282417
NLGN4X	neuroligin 4, X-linked	0.279818
CRIP1	cysteine-rich protein 1 (intestinal)	0.27935
LAMP3	lysosomal-associated membrane protein 3	0.277971
LOC100133678	null	0.277895
FCER2	Fc fragment of IgE, low affinity II, receptor for (CD23)	0.275378
PHLDA1	pleckstrin homology-like domain, family A, member 1	0.272132
TLR7	toll-like receptor 7	0.270621
IFI27	interferon, alpha-inducible protein 27	0.269849
ENTPD1	ectonucleoside triphosphate diphosphohydrolase 1	0.267171
PON2	paraoxonase 2	0.266822
FCRL3	Fc receptor-like 3	0.265224
RBPMS2	RNA binding protein with multiple splicing 2	0.263025
FCRL2	Fc receptor-like 2	0.262192
HLA-DQA1	major histocompatibility complex, class II, DQ alpha 1	0.261073
CXORF26	chromosome X open reading frame 26	0.260264
FSCN1	fascin homolog 1, actin-bundling protein (Strongylocentrotus purpuratus)	0.260034
FCGBP	Fc fragment of IgG binding protein	0.259094
STAT1	signal transducer and activator of transcription 1, 91kDa	0.256783
RGS1	regulator of G-protein signalling 1	0.254544
CD300A	CD300a molecule	0.250884
CD58	CD58 molecule	0.250254
ITM2A	integral membrane protein 2A	0.249034
AUTS2	autism susceptibility candidate 2	0.248826
CD86	CD86 molecule	0.24794
PRAME	preferentially expressed antigen in melanoma	0.247932
C13ORF15	chromosome 13 open reading frame 15	0.24702
C20ORF103	chromosome 20 open reading frame 103	0.245643
PRKCH	protein kinase C, eta	0.244539
FCRL5	Fc receptor-like 5	0.243871
FAM174B	null	0.243336
IFITM1	interferon induced transmembrane protein 1 (9-27)	0.241459
MARCKS	myristoylated alanine-rich protein kinase C substrate	0.240275
IFIT1	interferon-induced protein with tetratricopeptide repeats 1	0.239724
SAMSN1	SAM domain, SH3 domain and nuclear localisation signals, 1	0.236988
IRF7	interferon regulatory factor 7	0.236842
FCGR2B	Fc fragment of IgG, low affinity IIb, receptor (CD32)	0.236674
IFIT3	interferon-induced protein with tetratricopeptide repeats 3	0.235528
MVP	major vault protein	0.235435
PRKCB1	protein kinase C, beta 1	0.234205
CCL5	chemokine (C-C motif) ligand 5	0.230785
IGSF3	immunoglobulin superfamily, member 3	0.230333
DENND2D	DENN/MADD domain containing 2D	0.229767
CCL22	chemokine (C-C motif) ligand 22	0.229158
BAIAP2L1	BAI1-associated protein 2-like 1	0.227736
CCR7	chemokine (C-C motif) receptor 7	0.225244
PLAU	plasminogen activator, urokinase	0.224598
GAPT	null	0.223115
LOC283663	-	0.221947
IFIT2	interferon-induced protein with tetratricopeptide repeats 2	0.221819
MAL	mal, T-cell differentiation protein	0.221604
SH3TC1	SH3 domain and tetratricopeptide repeats 1	0.220822
EGR2	early growth response 2 (Krox-20 homolog, Drosophila)	0.220814
P2RY10	purinergic receptor P2Y, G-protein coupled, 10	0.220676
IL27RA	interleukin 27 receptor, alpha	0.22032
ANXA1	annexin A1	0.220143
CD27	null	0.218986
IRF9	null	0.217865
LOC730278	-	0.217353
NDFIP2	Nedd4 family interacting protein 2	0.217227
SYT17	synaptotagmin XVII	0.216754
EPDR1	ependymin related protein 1 (zebrafish)	0.215271
NMT2	N-myristoyltransferase 2	0.214811
HLA-A	major histocompatibility complex, class I, A	0.21435
MTAP	methylthioadenosine phosphorylase	0.214142
CD24	CD24 molecule	0.213357
LOC401233	-	0.213348
ASCL1	achaete-scute complex-like 1 (Drosophila)	0.212081
FAM3C	family with sequence similarity 3, member C	0.210853
CDKN1A	cyclin-dependent kinase inhibitor 1A (p21, Cip1)	0.210692
ADAM19	ADAM metallopeptidase domain 19 (meltrin beta)	0.210604
CHST7	carbohydrate (N-acetylglucosamine 6-O) sulfotransferase 7	0.210578
UTS2	urotensin 2	0.209752
HSPA6	heat shock 70kDa protein 6 (HSP70B')	0.209661
HES4	hairy and enhancer of split 4 (Drosophila)	0.208827
M160	null	0.208593
LOC100134134	null	0.208589
STX11	syntaxin 11	0.207605
CDK5R1	cyclin-dependent kinase 5, regulatory subunit 1 (p35)	0.206461
TRIM22	tripartite motif-containing 22	0.206216
LMNA	lamin A/C	0.205735
PSCDBP	pleckstrin homology, Sec7 and coiled-coil domains, binding protein	0.205494
LOC283340	-	0.204855
ATXN1	ataxin 1	0.204416
SAMD9	sterile alpha motif domain containing 9	0.201631
MSC	musculin (activated B-cell factor-1)	0.201558
SCARB2	scavenger receptor class B, member 2	0.199779
WNT5A	wingless-type MMTV integration site family, member 5A	0.198675
HSPA1B	heat shock 70kDa protein 1B	0.197835
ECGF1	endothelial cell growth factor 1 (platelet-derived)	0.19746
CDH1	cadherin 1, type 1, E-cadherin (epithelial)	0.197255
APOBEC3G	apolipoprotein B mRNA editing enzyme, catalytic polypeptide-like 3G	0.197217
FAM171A1	null	0.196376
LGALS1	lectin, galactoside-binding, soluble, 1 (galectin 1)	0.19622
ST3GAL5	ST3 beta-galactoside alpha-2,3-sialyltransferase 5	0.196206
C4ORF34	chromosome 4 open reading frame 34	0.194981
MT2A	metallothionein 2A	0.194501
TIMP1	TIMP metallopeptidase inhibitor 1	0.192566
ABHD6	abhydrolase domain containing 6	0.192543
BIN1	bridging integrator 1	0.192296
RBM47	null	0.191536
ACCS	null	0.190114
FGR	Gardner-Rasheed feline sarcoma viral (v-fgr) oncogene homolog	0.190087
LOC284293	null	0.189576
CLIC6	chloride intracellular channel 6	0.188787
NCF1	neutrophil cytosolic factor 1, (chronic granulomatous disease, autosomal 1)	0.188473
RGL1	ral guanine nucleotide dissociation stimulator-like 1	0.188215
RXRA	retinoid X receptor, alpha	0.187633
CASP1	caspase 1, apoptosis-related cysteine peptidase (interleukin 1, beta, convertase)	0.187567
BCHE	butyrylcholinesterase	0.187298
PARP12	poly (ADP-ribose) polymerase family, member 12	0.187088
TYROBP	TYRO protein tyrosine kinase binding protein	0.186522
CHFR	checkpoint with forkhead and ring finger domains	0.186369
D4S234E	-	0.186031
WDR66	WD repeat domain 66	0.184653
CCL20	chemokine (C-C motif) ligand 20	0.18462
NINJ1	ninjurin 1	0.184353
AV737317 CB HOMO SAP	null	0.184201
REC8	null	0.183797
NELL2	NEL-like 2 (chicken)	0.183698
HECW2	HECT, C2 and WW domain containing E3 ubiquitin protein ligase 2	0.183672
CLDN23	claudin 23	0.183566
IFI6	interferon, alpha-inducible protein 6	0.183537
TMEM119	transmembrane protein 119	0.182333
KANK1	null	0.181576
ARHGAP24	Rho GTPase activating protein 24	0.181424
HLA-F	major histocompatibility complex, class I, F	0.181062
ITM2C	integral membrane protein 2C	0.180226
RPP25	ribonuclease P 25kDa subunit	0.179969
PLIN2	null	0.179817
ITGB5	integrin, beta 5	0.179723
CYSLTR1	cysteinyl leukotriene receptor 1	0.179424
LOC645037	-	0.178006
PDLIM1	PDZ and LIM domain 1 (elfin)	0.177883
APOD	apolipoprotein D	0.177582
DAPL1	death associated protein-like 1	0.177353
C3ORF59	chromosome 3 open reading frame 59	0.177054
GAGE4	G antigen 4	0.176949
HLA-G	HLA-G histocompatibility antigen, class I, G	0.176947
HSPA4L	heat shock 70kDa protein 4-like	0.176843
TNFRSF8	tumor necrosis factor receptor superfamily, member 8	0.176264
IRF5	interferon regulatory factor 5	0.175964
MYBPH	myosin binding protein H	0.175767
RTKN	rhotekin	0.17565
ATHL1	ATH1, acid trehalase-like 1 (yeast)	0.175371
H1F0	H1 histone family, member 0	0.174927
PITPNC1	phosphatidylinositol transfer protein, cytoplasmic 1	0.174814
SPATS2L	null	0.174537
SLC12A8	solute carrier family 12 (potassium/chloride transporters), member 8	0.174488
EVI2B	ecotropic viral integration site 2B	0.174222
CYB5A	cytochrome b5 type A (microsomal)	0.17352
GADD45A	growth arrest and DNA-damage-inducible, alpha	0.173246
LOC647886	-	0.172371
MYO1G	myosin IG	0.17221
MSX1	msh homeobox homolog 1 (Drosophila)	0.17214
LHFPL2	lipoma HMGIC fusion partner-like 2	0.172134
S100A10	S100 calcium binding protein A10	0.171773
C10ORF33	chromosome 10 open reading frame 33	0.171747
UGT2B17	UDP glucuronosyltransferase 2 family, polypeptide B17	0.17125
GAGE12H	G antigen 12H	0.171238
MT1G	metallothionein 1G	0.17062
KCNMA1	potassium large conductance calcium-activated channel, subfamily M, alpha member 1	0.170548
RUNX3	runt-related transcription factor 3	0.170237
HCG4	HLA complex group 4	0.170069
LCMT2	leucine carboxyl methyltransferase 2	0.169691
UNC13C	unc-13 homolog C (C. elegans)	0.16947
RAB31	RAB31, member RAS oncogene family	0.168966
CREB5	cAMP responsive element binding protein 5	0.168745
AGENCOURT_14535501 N	null	0.168627
WARS	tryptophanyl-tRNA synthetase	0.168051
OAS3	2'-5'-oligoadenylate synthetase 3, 100kDa	0.168049
S100A11	S100 calcium binding protein A11	0.167708
GAGE5	G antigen 5	0.16702
WIPI2	WD repeat domain, phosphoinositide interacting 2	0.166845
GAGE12J	null	0.165671
PRIC285	-	0.165198
PLEK	pleckstrin	0.165188
NOD2	null	0.164216
RNF165	ring finger protein 165	0.164162
TRPV2	transient receptor potential cation channel, subfamily V, member 2	0.163925
ALPK2	alpha-kinase 2	0.163747
TNFRSF13B	tumor necrosis factor receptor superfamily, member 13B	0.16364
LOC402221	-	0.163525
GAGE12I	null	0.163088
LHPP	-	0.161922
BATF	basic leucine zipper transcription factor, ATF-like	0.161603
DNAJB6	DnaJ (Hsp40) homolog, subfamily B, member 6	0.16109
CD80	CD80 molecule	0.160761
ANKDD1A	ankyrin repeat and death domain containing 1A	0.160699
UPB1	ureidopropionase, beta	0.160411
NETO2	neuropilin (NRP) and tolloid (TLL)-like 2	0.160312
UST	uronyl-2-sulfotransferase	0.160173
CD69	CD69 molecule	0.159963
LASS6	LAG1 homolog, ceramide synthase 6 (S. cerevisiae)	0.159674
PRKCB	null	0.159557
FKSG30	-	0.15905
FLJ35767	-	0.15881
GAGE12B	G antigen 12B	0.158633
CD163L1	CD163 molecule-like 1	0.15813
IL23A	interleukin 23, alpha subunit p19	0.158059
LOC645993	-	0.158035
LOC387820	-	0.157539
GAGE12C	G antigen 12C	0.156635
DDIT4	DNA-damage-inducible transcript 4	0.156522
ADAP2	null	0.15606
TMEM149	transmembrane protein 149	0.155796
PSEN2	presenilin 2 (Alzheimer disease 4)	0.155486
C12ORF5	chromosome 12 open reading frame 5	0.154836
HTATIP2	HIV-1 Tat interactive protein 2, 30kDa	0.154797
S1PR1	null	0.153426
PRRX1	paired related homeobox 1	0.152736
LOC730517	-	0.152697
GAGE12G	G antigen 12G	0.152536
SLC29A4	solute carrier family 29 (nucleoside transporters), member 4	0.15236
MAPK10	mitogen-activated protein kinase 10	0.151851
KLRC3	killer cell lectin-like receptor subfamily C, member 3	0.151772
SRGN	null	0.151449
CDK2	cyclin-dependent kinase 2	0.151383
F12	coagulation factor XII (Hageman factor)	0.151175
CXXC4	CXXC finger 4	0.15106
CADM1	null	0.15094
ANXA6	annexin A6	0.150566
FARP1	FERM, RhoGEF (ARHGEF) and pleckstrin domain protein 1 (chondrocyte-derived)	0.150419
SIRPA	signal-regulatory protein alpha	0.149988
CXCR4	chemokine (C-X-C motif) receptor 4	0.149967
CYTIP	null	0.14974
C17ORF87	null	0.149677
GNPDA1	glucosamine-6-phosphate deaminase 1	0.148975
CDC42EP4	CDC42 effector protein (Rho GTPase binding) 4	0.148826
LRRN3	leucine rich repeat neuronal 3	0.148555
ZNF193	zinc finger protein 193	0.148434
BTBD6	BTB (POZ) domain containing 6	0.148363
IER3	immediate early response 3	0.148216
EBI3	Epstein-Barr virus induced gene 3	0.148215
PTPRO	protein tyrosine phosphatase, receptor type, O	0.148108
LY6E	lymphocyte antigen 6 complex, locus E	0.148081
TH02B02.X1 NCI_CGAP_	null	0.148074
IL2RB	interleukin 2 receptor, beta	0.148044
RHOC	ras homolog gene family, member C	0.147995
CAV1	caveolin 1, caveolae protein, 22kDa	0.147614
TP53INP1	tumor protein p53 inducible nuclear protein 1	0.147608
GAGE6	G antigen 6	0.147065
HEY1	hairy/enhancer-of-split related with YRPW motif 1	0.146973
SUB1	SUB1 homolog (S. cerevisiae)	0.146841
OTP	orthopedia homolog (Drosophila)	0.146802
TP63	null	0.146749
SUOX	sulfite oxidase	0.146742
AHNAK	AHNAK nucleoprotein (desmoyokin)	0.146483
ENPP2	ectonucleotide pyrophosphatase/phosphodiesterase 2 (autotaxin)	0.146434
NINJ2	ninjurin 2	0.146428
NOTCH4	Notch homolog 4 (Drosophila)	0.145795
PARP9	poly (ADP-ribose) polymerase family, member 9	0.145775
NQO1	NAD(P)H dehydrogenase, quinone 1	0.145626
FBLN2	fibulin 2	0.145514
STYXL1	serine/threonine/tyrosine interacting-like 1	0.145509
IFI35	interferon-induced protein 35	0.145449
HLA-H	major histocompatibility complex, class I, H (pseudogene)	0.145381
C9ORF46	chromosome 9 open reading frame 46	0.144865
DUSP23	dual specificity phosphatase 23	0.144846
HPS1	Hermansky-Pudlak syndrome 1	0.144516
ARPC1B	actin related protein 2/3 complex, subunit 1B, 41kDa	0.144345
ABCB1	ATP-binding cassette, sub-family B (MDR/TAP), member 1	0.144333
ZNF532	zinc finger protein 532	0.144242
USP18	ubiquitin specific peptidase 18	0.143847
DUSP16	dual specificity phosphatase 16	0.14381
LOC652616	null	0.143784
ME1	malic enzyme 1, NADP(+)-dependent, cytosolic	0.14327
ENO3	enolase 3 (beta, muscle)	0.143012
GLIPR1	GLI pathogenesis-related 1 (glioma)	0.142952
STK17B	serine/threonine kinase 17b (apoptosis-inducing)	0.142907
SCPEP1	serine carboxypeptidase 1	0.142821
SERPINI1	serpin peptidase inhibitor, clade I (neuroserpin), member 1	0.142562
MS4A7	membrane-spanning 4-domains, subfamily A, member 7	0.142407
LITAF	lipopolysaccharide-induced TNF factor	0.14223
PIGR	polymeric immunoglobulin receptor	0.141986
GAD1	glutamate decarboxylase 1 (brain, 67kDa)	0.141753
CR2	complement component (3d/Epstein Barr virus) receptor 2	0.14167
ABI3	ABI gene family, member 3	0.141616
IL4I1	interleukin 4 induced 1	0.141482
C14ORF159	chromosome 14 open reading frame 159	0.141282
PSMC4	proteasome (prosome, macropain) 26S subunit, ATPase, 4	0.141036
C10ORF61	chromosome 10 open reading frame 61	0.140924
LOC648024	-	0.140856
UCA1	-	0.140835
APOBEC3H	null	0.140629
HOMO SAPIENS PRIMARY	null	0.140221
MS4A1	membrane-spanning 4-domains, subfamily A, member 1	0.140129
ISG15	ISG15 ubiquitin-like modifier	0.140057
RNF144	ring finger protein 144	0.139881
RASSF4	Ras association (RalGDS/AF-6) domain family 4	0.139829
LIPG	lipase, endothelial	0.13932
C1ORF106	chromosome 1 open reading frame 106	0.139087
PCDH9	protocadherin 9	0.138764
C20ORF100	chromosome 20 open reading frame 100	0.138719
OPN3	opsin 3 (encephalopsin, panopsin)	0.138221
APP	amyloid beta (A4) precursor protein (peptidase nexin-II, Alzheimer disease)	0.138089
FERMT3	null	0.137687
FLJ20273	-	0.13716
GAGE2E	null	0.137101
CD8A	CD8a molecule	0.137037
IGJ	immunoglobulin J polypeptide, linker protein for immunoglobulin alpha and mu polypeptides	0.136908
HAVCR2	hepatitis A virus cellular receptor 2	0.136883
BLVRA	biliverdin reductase A	0.136803
PSTPIP2	proline-serine-threonine phosphatase interacting protein 2	0.136522
LOC644063	-	0.136413
ZBTB32	zinc finger and BTB domain containing 32	0.136362
NAP1L3	nucleosome assembly protein 1-like 3	0.135948
LOC651751	-	0.135817
SEMA6A	sema domain, transmembrane domain (TM), and cytoplasmic domain, (semaphorin) 6A	0.135422
GAGE2A	null	0.135383
SLAMF6	SLAM family member 6	0.135369
MYLIP	myosin regulatory light chain interacting protein	0.134951
ANXA5	annexin A5	0.134895
GM2A	GM2 ganglioside activator	0.13482
EHD4	EH-domain containing 4	0.13465
TMOD1	tropomodulin 1	0.134411
PLA1A	phospholipase A1 member A	0.134408
CDKN2C	cyclin-dependent kinase inhibitor 2C (p18, inhibits CDK4)	0.134335
CHST2	carbohydrate (N-acetylglucosamine-6-O) sulfotransferase 2	0.134284
LILRB4	leukocyte immunoglobulin-like receptor, subfamily B (with TM and ITIM domains), member 4	0.134116
TMEM140	transmembrane protein 140	0.134011
LOC649856	null	0.133357
MGLL	monoglyceride lipase	0.133298
DKFZP761P0423	-	0.133249
GALNT10	UDP-N-acetyl-alpha-D-galactosamine:polypeptide N-acetylgalactosaminyltransferase 10 (GalNAc-T10)	0.133162
LOC652826	-	0.132821
LOC100134728	null	0.132639
DHRS2	dehydrogenase/reductase (SDR family) member 2	0.132591
ABCC5	ATP-binding cassette, sub-family C (CFTR/MRP), member 5	0.132591
LGMN	legumain	0.132396
C21ORF42	chromosome 21 open reading frame 42	0.132363
FCRL4	Fc receptor-like 4	0.132233
VAMP1	vesicle-associated membrane protein 1 (synaptobrevin 1)	0.132019
JAM2	junctional adhesion molecule 2	0.131747
TIAM2	T-cell lymphoma invasion and metastasis 2	0.131597
IL1R2	interleukin 1 receptor, type II	0.131364
RAB5B	RAB5B, member RAS oncogene family	0.131147
LRP3	low density lipoprotein receptor-related protein 3	0.130918
NMU	neuromedin U	0.13084
TIMD4	T-cell immunoglobulin and mucin domain containing 4	0.130139
ABCB9	ATP-binding cassette, sub-family B (MDR/TAP), member 9	0.12972
NEU1	sialidase 1 (lysosomal sialidase)	0.129563
TBC1D9	TBC1 domain family, member 9 (with GRAM domain)	0.129532
CLCNKA	chloride channel Ka	0.1294
C6ORF125	chromosome 6 open reading frame 125	0.129169
PTPN13	protein tyrosine phosphatase, non-receptor type 13 (APO-1/CD95 (Fas)-associated phosphatase)	0.129081
NCF1C	neutrophil cytosolic factor 1C pseudogene	0.129052
ITGAL	integrin, alpha L (antigen CD11A (p180), lymphocyte function-associated antigen 1; alpha polypeptide)	0.128985
LIN28B	lin-28 homolog B (C. elegans)	0.128979
CNR1	cannabinoid receptor 1 (brain)	0.128973
TTLL3	tubulin tyrosine ligase-like family, member 3	0.128857
LY9	lymphocyte antigen 9	0.128833
SYN1	synapsin I	0.128573
TAP1	transporter 1, ATP-binding cassette, sub-family B (MDR/TAP)	0.128479
GTF2I	general transcription factor II, i	0.128297
SHROOM2	shroom family member 2	0.128277
PECR	peroxisomal trans-2-enoyl-CoA reductase	0.128263
SCML1	sex comb on midleg-like 1 (Drosophila)	0.128049
ZNF341	zinc finger protein 341	0.127958
SPRY2	sprouty homolog 2 (Drosophila)	0.127585
PTP4A3	protein tyrosine phosphatase type IVA, member 3	0.127567
SERPINF1	serpin peptidase inhibitor, clade F (alpha-2 antiplasmin, pigment epithelium derived factor), member 1	0.127495
LOC653888	-	0.127378
C10ORF76	chromosome 10 open reading frame 76	0.127332
UBA7	null	0.127324
GAGE2B	null	0.127091
PTMS	parathymosin	0.127037
SAMD9L	sterile alpha motif domain containing 9-like	0.126989
COX17	COX17 cytochrome c oxidase assembly homolog (S. cerevisiae)	0.12663
BBOX1	butyrobetaine (gamma), 2-oxoglutarate dioxygenase (gamma-butyrobetaine hydroxylase) 1	0.126609
ACTA2	actin, alpha 2, smooth muscle, aorta	0.126581
LMO3	LIM domain only 3 (rhombotin-like 2)	0.126193
ADAM8	ADAM metallopeptidase domain 8	0.125594
BASP1	brain abundant, membrane attached signal protein 1	0.125355
RUFY3	RUN and FYVE domain containing 3	0.124907
ZC3H12C	zinc finger CCCH-type containing 12C	0.124602
TNFAIP8	tumor necrosis factor, alpha-induced protein 8	0.124471
TRAF1	TNF receptor-associated factor 1	0.124469
MGC61598	-	0.124353
SLC2A6	solute carrier family 2 (facilitated glucose transporter), member 6	0.124252
ATP6V0D1	ATPase, H+ transporting, lysosomal 38kDa, V0 subunit d1	0.124031
UROS	uroporphyrinogen III synthase (congenital erythropoietic porphyria)	0.123525
MAPKAP1	mitogen-activated protein kinase associated protein 1	0.123446
PAQR8	progestin and adipoQ receptor family member VIII	0.123393
PMAIP1	phorbol-12-myristate-13-acetate-induced protein 1	0.123308
C6ORF105	chromosome 6 open reading frame 105	0.123216
EEF1A2	eukaryotic translation elongation factor 1 alpha 2	0.123124
OSBPL3	oxysterol binding protein-like 3	0.122949
UBE2J1	ubiquitin-conjugating enzyme E2, J1 (UBC6 homolog, yeast)	0.122805
LOC100129466	null	0.122783
COPG2	coatomer protein complex, subunit gamma 2	0.122108
HOPX	null	0.1221
RNF135	ring finger protein 135	0.121641
HLA-DRB1	major histocompatibility complex, class II, DR beta 1	0.121611
HIST1H2AC	histone cluster 1, H2ac	0.12115
FUCA1	fucosidase, alpha-L- 1, tissue	0.121119
TSC22D3	TSC22 domain family, member 3	0.120807
TLE1	transducin-like enhancer of split 1 (E(sp1) homolog, Drosophila)	0.12007
FLJ23834	-	0.119998
CETP	cholesteryl ester transfer protein, plasma	0.119985
MANBA	mannosidase, beta A, lysosomal	0.119957
PIK3CD	phosphoinositide-3-kinase, catalytic, delta polypeptide	0.119816
GPR18	G protein-coupled receptor 18	0.119746
STK40	serine/threonine kinase 40	0.119557
FAS	Fas (TNF receptor superfamily, member 6)	0.119394
GAGE12F	G antigen 12F	0.119155
SERTAD2	SERTA domain containing 2	0.119137
RARA	retinoic acid receptor, alpha	0.119122
PHLDA3	pleckstrin homology-like domain, family A, member 3	0.119048
RABL3	RAB, member of RAS oncogene family-like 3	0.11879
PIK3IP1	null	0.118773
LOC642073	-	0.118697
GSTK1	glutathione S-transferase kappa 1	0.118688
RAB9A	null	0.118627
EDG1	endothelial differentiation, sphingolipid G-protein-coupled receptor, 1	0.118518
VIM	vimentin	0.118464
NFKB2	nuclear factor of kappa light polypeptide gene enhancer in B-cells 2 (p49/p100)	0.118337
HLA-DRB5	major histocompatibility complex, class II, DR beta 5	0.117933
HLA-B	major histocompatibility complex, class I, B	0.117715
BHLHB3	basic helix-loop-helix domain containing, class B, 3	0.117534
FREQ	frequenin homolog (Drosophila)	0.117515
PRKAG1	protein kinase, AMP-activated, gamma 1 non-catalytic subunit	0.117481
TUBB2B	tubulin, beta 2B	0.117468
GIT2	G protein-coupled receptor kinase interactor 2	0.117385
LOC642755	-	0.117248
APOBEC3F	apolipoprotein B mRNA editing enzyme, catalytic polypeptide-like 3F	0.117197
LOC731486	-	0.117112
C18ORF19	chromosome 18 open reading frame 19	0.116912
KCNMB2	potassium large conductance calcium-activated channel, subfamily M, beta member 2	0.116832
ARL6IP5	ADP-ribosylation-like factor 6 interacting protein 5	0.116727
TAX1BP1	Tax1 (human T-cell leukemia virus type I) binding protein 1	0.116698
KLK1	kallikrein 1, renal/pancreas/salivary	0.116443
C19ORF36	chromosome 19 open reading frame 36	0.116422
AV681673 GKB HOMO SA	null	0.116293
MBOAT1	membrane bound O-acyltransferase domain containing 1	0.116251
VCL	vinculin	0.116182
HERC6	hect domain and RLD 6	0.115887
HCP5	HLA complex P5	0.115768
STAT4	signal transducer and activator of transcription 4	0.115682
C9ORF21	chromosome 9 open reading frame 21	0.115594
ABCA3	ATP-binding cassette, sub-family A (ABC1), member 3	0.115338
LOC652184	null	0.115134
FCGR2A	Fc fragment of IgG, low affinity IIa, receptor (CD32)	0.115133
CRELD1	cysteine-rich with EGF-like domains 1	0.11496
SNORD31	small nucleolar RNA, C/D box 31	0.11467
PRAGMIN	null	0.114628
LOC100132418	null	0.114447
NNAT	neuronatin	0.114176
TFAP2A	transcription factor AP-2 alpha (activating enhancer binding protein 2 alpha)	0.114135
LOC730024	-	0.113999
GADD45B	growth arrest and DNA-damage-inducible, beta	0.113994
LAMP1	lysosomal-associated membrane protein 1	0.113826
RFTN1	raftlin, lipid raft linker 1	0.113465
BHLHB2	basic helix-loop-helix domain containing, class B, 2	0.113381
LOC100128086	null	0.113242
AKIRIN2	null	0.113036
RNF167	ring finger protein 167	0.112968
PSME2	proteasome (prosome, macropain) activator subunit 2 (PA28 beta)	0.112938
LOC100129086	null	0.112879
RAMP1	receptor (calcitonin) activity modifying protein 1	0.112842
ENC1	ectodermal-neural cortex (with BTB-like domain)	0.112837
IFITM2	interferon induced transmembrane protein 2 (1-8D)	0.112818
LOC285908	-	0.112816
C18ORF8	chromosome 18 open reading frame 8	0.112789
TCTN1	null	0.112781
TNFRSF4	tumor necrosis factor receptor superfamily, member 4	0.112108
FAIM3	Fas apoptotic inhibitory molecule 3	0.112098
BMP7	bone morphogenetic protein 7 (osteogenic protein 1)	0.112083
LOC390940	-	0.112042
SGPP2	sphingosine-1-phosphate phosphotase 2	0.111772
CHST4	carbohydrate (N-acetylglucosamine 6-O) sulfotransferase 4	0.111765
RSPH1	null	0.111472
RNF144A	null	0.111459
TLCD1	TLC domain containing 1	0.111315
GPSM3	G-protein signalling modulator 3 (AGS3-like, C. elegans)	0.111311
KIAA0020	KIAA0020	0.111223
UGT2B7	UDP glucuronosyltransferase 2 family, polypeptide B7	0.111169
DDX60	null	0.110995
SLC16A4	solute carrier family 16, member 4 (monocarboxylic acid transporter 5)	0.110975
HIST1H2BK	histone cluster 1, H2bk	0.110939
EHD1	EH-domain containing 1	0.110931
GBP2	guanylate binding protein 2, interferon-inducible	0.110874
C11ORF82	null	0.110795
SUSD3	sushi domain containing 3	0.110764
SOX11	SRY (sex determining region Y)-box 11	0.110708
IL18BP	interleukin 18 binding protein	0.110658
ENDOD1	endonuclease domain containing 1	0.11061
RIPK2	receptor-interacting serine-threonine kinase 2	0.110575
A2LD1	null	0.110425
STAG3	stromal antigen 3	0.11042
IFNGR2	interferon gamma receptor 2 (interferon gamma transducer 1)	0.110384
MAP1B	microtubule-associated protein 1B	0.110185
LIMS2	LIM and senescent cell antigen-like domains 2	0.10999
DUSP4	dual specificity phosphatase 4	0.10993
SIK1	null	0.109863
FAM127A	null	0.109838
LOC100130633	null	0.10971
BAMBI	BMP and activin membrane-bound inhibitor homolog (Xenopus laevis)	0.1095
MXD1	MAX dimerization protein 1	0.10942
INPP1	inositol polyphosphate-1-phosphatase	0.109376
FYN	FYN oncogene related to SRC, FGR, YES	0.109228
PXDN	peroxidasin homolog (Drosophila)	0.108968
PLCB2	phospholipase C, beta 2	0.108813
AKT1	v-akt murine thymoma viral oncogene homolog 1	0.108672
SEMA4B	sema domain, immunoglobulin domain (Ig), transmembrane domain (TM) and short cytoplasmic domain, (semaphorin) 4B	0.108633
VCX-C	-	0.108631
C10ORF47	chromosome 10 open reading frame 47	0.108362
SNX10	sorting nexin 10	0.108184
DHX16	DEAH (Asp-Glu-Ala-His) box polypeptide 16	0.108174
MAGEB2	melanoma antigen family B, 2	0.108152
ALPL	alkaline phosphatase, liver/bone/kidney	0.108038
C1ORF53	chromosome 1 open reading frame 53	0.108036
C6ORF136	chromosome 6 open reading frame 136	0.107965
PIB5PA	phosphatidylinositol (4,5) bisphosphate 5-phosphatase, A	0.107962
RAGE	renal tumor antigen	0.107876
TFPI2	tissue factor pathway inhibitor 2	0.107815
TSPAN33	tetraspanin 33	0.107768
TGM5	transglutaminase 5	0.107749
SLC7A7	solute carrier family 7 (cationic amino acid transporter, y+ system), member 7	0.107718
OAS2	2'-5'-oligoadenylate synthetase 2, 69/71kDa	0.107706
LOC642282	null	0.107256
LOC645638	-	0.107089
HIST1H1C	histone cluster 1, H1c	0.10702
WNT5B	wingless-type MMTV integration site family, member 5B	0.107018
CTSH	cathepsin H	0.106799
SAT1	spermidine/spermine N1-acetyltransferase 1	0.10659
OPTN	optineurin	0.106572
GCNT1	glucosaminyl (N-acetyl) transferase 1, core 2 (beta-1,6-N-acetylglucosaminyltransferase)	0.106424
SOX18	SRY (sex determining region Y)-box 18	0.106344
GRAP2	GRB2-related adaptor protein 2	0.10632
DCN	decorin	0.106318
ADAL	adenosine deaminase-like	0.106245
FEZ1	fasciculation and elongation protein zeta 1 (zygin I)	0.106035
SETD4	SET domain containing 4	0.106011
VCAM1	vascular cell adhesion molecule 1	0.105518
PPP1R11	protein phosphatase 1, regulatory (inhibitor) subunit 11	0.10551
DAAM1	dishevelled associated activator of morphogenesis 1	0.105461
PLEKHF1	pleckstrin homology domain containing, family F (with FYVE domain) member 1	0.10546
CCDC74A	coiled-coil domain containing 74A	0.105411
GOLGA3	golgi autoantigen, golgin subfamily a, 3	0.105326
IFI30	interferon, gamma-inducible protein 30	0.105188
HCK	hemopoietic cell kinase	0.104995
MINPP1	multiple inositol polyphosphate histidine phosphatase, 1	0.104792
DSG2	desmoglein 2	0.104676
ZCCHC12	zinc finger, CCHC domain containing 12	0.104652
PDLIM7	PDZ and LIM domain 7 (enigma)	0.104633
LACTB	lactamase, beta	0.104532
KIAA1797	KIAA1797	0.104527
CXCR5	null	0.104446
ITPRIPL2	null	0.104371
PREX1	-	0.104272
GPRC5C	G protein-coupled receptor, family C, group 5, member C	0.104228
CORO1C	coronin, actin binding protein, 1C	0.104226
LOC392437	-	0.104168
RNF5P1	ring finger protein 5 pseudogene 1	0.103985
LY86	lymphocyte antigen 86	0.103934
TCTN3	null	0.103872
PAPLN	papilin, proteoglycan-like sulfated glycoprotein	0.103789
CYCSL1	cytochrome c, somatic-like 1	0.103641
STAT2	signal transducer and activator of transcription 2, 113kDa	0.103557
LAPTM4B	lysosomal associated protein transmembrane 4 beta	0.103475
RAD54B	RAD54 homolog B (S. cerevisiae)	0.103445
TP53I3	tumor protein p53 inducible protein 3	0.103368
CADPS2	Ca2+-dependent activator protein for secretion 2	0.103313
RUNDC3B	null	0.103116
LOC643668	-	0.10311
BACE2	beta-site APP-cleaving enzyme 2	0.103078
DDAH1	dimethylarginine dimethylaminohydrolase 1	0.10303
VCX3A	variable charge, X-linked 3A	0.102988
KLF6	Kruppel-like factor 6	0.102984
ZNF462	zinc finger protein 462	0.10296
LOC730167	-	0.102836
SPATA20	spermatogenesis associated 20	0.102755
MS4A6A	membrane-spanning 4-domains, subfamily A, member 6A	0.102665
LRCH4	leucine-rich repeats and calponin homology (CH) domain containing 4	0.102659
ISCU	null	0.102605
HIST1H4K	histone cluster 1, H4k	0.102549
SCAMP5	secretory carrier membrane protein 5	0.102497
CD82	CD82 molecule	0.102469
SLC25A25	solute carrier family 25 (mitochondrial carrier; phosphate carrier), member 25	0.102182
TMEM19	transmembrane protein 19	0.102145
GPR55	G protein-coupled receptor 55	0.102047
LGALS9	lectin, galactoside-binding, soluble, 9 (galectin 9)	0.102012
ILDR1	immunoglobulin-like domain containing receptor 1	0.10196
GPR137	G protein-coupled receptor 137	0.101879
VCX	variable charge, X-linked	0.101816
LOC100130179	null	0.101662
CUGBP2	CUG triplet repeat, RNA binding protein 2	0.101637
GNG11	guanine nucleotide binding protein (G protein), gamma 11	0.101629
IL18R1	interleukin 18 receptor 1	0.101599
APOBEC3B	apolipoprotein B mRNA editing enzyme, catalytic polypeptide-like 3B	0.10158
IER5	immediate early response 5	0.101527
PCBD1	pterin-4 alpha-carbinolamine dehydratase/dimerization cofactor of hepatocyte nuclear factor 1 alpha (TCF1)	0.101515
RAB38	RAB38, member RAS oncogene family	0.10138
ITFG1	integrin alpha FG-GAP repeat containing 1	0.101258
GBP6	guanylate binding protein family, member 6	0.101175
ROBO1	roundabout, axon guidance receptor, homolog 1 (Drosophila)	0.101068
SIDT1	SID1 transmembrane family, member 1	0.100999
MARVELD2	MARVEL domain containing 2	0.100877
GIYD1	GIY-YIG domain containing 1	0.100681
SP110	SP110 nuclear body protein	0.100604
UBE2F	ubiquitin-conjugating enzyme E2F (putative)	0.100541
ZYX	zyxin	0.100456
LYPLA1	lysophospholipase I	0.100425
ZNF358	zinc finger protein 358	0.100384
PUS3	pseudouridylate synthase 3	0.10029
CDKN2A	cyclin-dependent kinase inhibitor 2A (melanoma, p16, inhibits CDK4)	0.100276
MIR1978	null	0.100045
STEAP3	STEAP family member 3	0.0998892
EIF2B2	eukaryotic translation initiation factor 2B, subunit 2 beta, 39kDa	0.0998347
ZMYM6	zinc finger, MYM-type 6	0.0998318
GNG8	guanine nucleotide binding protein (G protein), gamma 8	0.0997883
MPEG1	-	0.0996701
NRAS	neuroblastoma RAS viral (v-ras) oncogene homolog	0.0995973
PLA2G4B	phospholipase A2, group IVB (cytosolic)	0.0995141
LMBRD1	LMBR1 domain containing 1	0.0992998
ASCC1	activating signal cointegrator 1 complex subunit 1	0.0992987
NBN	nibrin	0.0991784
SKAP2	src kinase associated phosphoprotein 2	0.0991754
GAGE8	G antigen 8	0.0991601
OSGIN2	oxidative stress induced growth inhibitor family member 2	0.0991512
OPLAH	5-oxoprolinase (ATP-hydrolysing)	0.0990987
RPS7	ribosomal protein S7	0.0989955
OPRL1	opiate receptor-like 1	0.0989368
REPIN1	replication initiator 1	0.0988998
ING3	inhibitor of growth family, member 3	0.0988726
DPEP3	dipeptidase 3	0.0988131
ABCF2	ATP-binding cassette, sub-family F (GCN20), member 2	0.0987132
COX4I2	cytochrome c oxidase subunit IV isoform 2 (lung)	0.0986609
PRPF40A	PRP40 pre-mRNA processing factor 40 homolog A (yeast)	0.0986535
HIST1H2BD	histone cluster 1, H2bd	0.0985777
FBLN5	fibulin 5	0.0985602
HLA-E	major histocompatibility complex, class I, E	0.0984008
GBE1	glucan (1,4-alpha-), branching enzyme 1 (glycogen branching enzyme, Andersen disease, glycogen storage disease type IV)	0.0983883
FTHL7	ferritin, heavy polypeptide-like 7	0.0983639
ITPKA	inositol 1,4,5-trisphosphate 3-kinase A	0.0983345
RAB12	RAB12, member RAS oncogene family	0.098329
CD6	CD6 molecule	0.0983202
ARMC10	null	0.0983098
FAM49A	family with sequence similarity 49, member A	0.0982101
PEG10	paternally expressed 10	0.0980675
BCL3	B-cell CLL/lymphoma 3	0.0980079
MGAT3	mannosyl (beta-1,4-)-glycoprotein beta-1,4-N-acetylglucosaminyltransferase	0.097902
CYLN2	cytoplasmic linker 2	0.0977944
TMEM118	transmembrane protein 118	0.0976246
MTMR15	null	0.097602
KLRC2	killer cell lectin-like receptor subfamily C, member 2	0.0975937
MPPE1	metallophosphoesterase 1	0.0975933
CD226	CD226 molecule	0.0974922
LOC652864	null	0.0974256
WDR91	null	0.0972555
MRPS6	mitochondrial ribosomal protein S6	0.0969347
KIAA0261	null	0.0967843
ARHGAP1	Rho GTPase activating protein 1	0.0965622
VPS37B	vacuolar protein sorting 37 homolog B (S. cerevisiae)	0.0964419
TAP2	transporter 2, ATP-binding cassette, sub-family B (MDR/TAP)	0.0963601
MRPL20	mitochondrial ribosomal protein L20	0.0963218
NEDD9	neural precursor cell expressed, developmentally down-regulated 9	0.096198
LOC399942	-	0.0961943
NAB2	NGFI-A binding protein 2 (EGR1 binding protein 2)	0.0961443
FTHL16	ferritin, heavy polypeptide-like 16	0.0961403
SLC16A14	solute carrier family 16, member 14 (monocarboxylic acid transporter 14)	0.0957951
OMA1	OMA1 homolog, zinc metallopeptidase (S. cerevisiae)	0.0957154
GAGE12E	G antigen 12E	0.0956644
ERRFI1	ERBB receptor feedback inhibitor 1	0.0956034
KCNJ16	potassium inwardly-rectifying channel, subfamily J, member 16	0.0955521
SETMAR	SET domain and mariner transposase fusion gene	0.0955217
DEXI	-	0.0954889
DNAJA1	DnaJ (Hsp40) homolog, subfamily A, member 1	0.0954835
TMEM51	transmembrane protein 51	0.0953642
LOC644162	null	0.0953181
UBE2L6	ubiquitin-conjugating enzyme E2L 6	0.095201
CEP192	centrosomal protein 192kDa	0.0951575
QDPR	quinoid dihydropteridine reductase	0.0951512
UNC119	unc-119 homolog (C. elegans)	0.0950942
FAM113B	family with sequence similarity 113, member B	0.09508
VPS37C	vacuolar protein sorting 37 homolog C (S. cerevisiae)	0.0950688
PRR14	proline rich 14	0.0946239
ATG4C	ATG4 autophagy related 4 homolog C (S. cerevisiae)	0.0945939
RNGTT	RNA guanylyltransferase and 5'-phosphatase	0.0944998
C7ORF10	chromosome 7 open reading frame 10	0.0942682
RILPL2	null	0.0941707
PSMB9	proteasome (prosome, macropain) subunit, beta type, 9 (large multifunctional peptidase 2)	0.0940986
EI24	etoposide induced 2.4 mRNA	0.0938617
LRWD1	null	0.0938428
SNORD48	small nucleolar RNA, C/D box 48	0.0938066
MSLN	mesothelin	0.0936895
GLCCI1	glucocorticoid induced transcript 1	0.0936571
CD276	CD276 molecule	0.0936558
TSPAN4	tetraspanin 4	0.0934821
LOC644684	-	0.0934359
ZNF519	zinc finger protein 519	0.093358
LOC402644	-	0.0933413
GLOD4	null	0.0933133
NAMPT	null	0.0932991
GIMAP8	GTPase, IMAP family member 8	0.0932322
ITK	IL2-inducible T-cell kinase	0.0932246
BBS10	Bardet-Biedl syndrome 10	0.0932056
TNFRSF13C	tumor necrosis factor receptor superfamily, member 13C	0.0931808
EIF2AK2	eukaryotic translation initiation factor 2-alpha kinase 2	0.0930755
LOC652481	null	0.0930606
NCRNA00158	null	0.0930303
[truncated: 33,345 more rows]
