# Supplementary material for: PQR309 Is a Novel Dual PI3K/mTOR Inhibitor with Preclinical Antitumor Activity in Lymphomas as a Single Agent and in Combination Therapy
Source: Oxford University Press journal article supplement (doi:10.1158/1078-0432.ccr-17-1041), 2017-10-24
Supplement: 10780432ccr171041-sup-181771_2_supp_4322364_bxm7fc.xlsx [file 10780432ccr171041-sup-181771_2_supp_4322364_bxm7fc.xlsx]

## Sheet: Sheet1
Table S7A
ProteinId	UniProtId	PrecursorId	ModifiedPeptide	DMSO-OCILY1	DMSO-SP53	DMSO-SUDHL10	DMSO-SUDHL2	DMSO-TMD8	DMSO-Z138	PQR309-OCILY1	PQR309-SP53	PQR309-SUDHL10	PQR309-SUDHL2	PQR309-TMD8	PQR309-Z138
A0AVK6	E2F8_HUMAN	KINSAPSSPIK.2	KINS[Ph]APSS[Ph]PIK	10982.8	6922.75		8083.02		9219.46	11605.9	8641.02	5073.74	10062.2		12687.3
A0JLT2	MED19_HUMAN	NRHSPDHPGMGSSQASSSSSLR.3	NRHS[Ph]PDHPGMGSSQASSSSSLR	6591.69			6005.78	9186.27		8083.6	10953	4456.93	7027.81	10519.4
A0JLT2	MED19_HUMAN	NRHSPDHPGMGSSQASSSSSLR.4	NRHS[Ph]PDHPGMGSSQASSSSSLR	16616.2			17990.5	8945.01		17675.6	29026.9		14804.4	23222.6
A2A288	ZC12D_HUMAN	GSPDLAALR.2	GS[Ph]PDLAALR	33220.9		6469.95	22156.9	4350.43		45984.8	6737.51	9036.09	23258.1	9390.61
A2RUR9;Q3MJ40;Q86YV0	C144A_HUMAN;C144B_HUMAN;RASL3_HUMAN	DSASLPR.2	DS[Ph]ASLPR			17951.9	6943.96	1130.07		1796.37	5964.65	16849.1	8103.55	909.286
A6NC98	CC88B_HUMAN	RSSLQSPASVAPPQGPGTK.2	RSS[Ph]LQSPASVAPPQGPGTK	14428	15285.7	27341.8	10281.6	3116.76		9844.97	9608.1	27484.2	10853.7	2544.36
A6NC98	CC88B_HUMAN	RSSLQSPASVAPPQGPGTK.3	RS[Ph]SLQSPASVAPPQGPGTK	15899.8	20679.4	31487.9	9744.79	8234.82		12271.1	20289.5	32695.3	7079.86	6229.16
A6NC98	CC88B_HUMAN	RSSLQSPASVAPPQGPGTK.3	RSS[Ph]LQSPASVAPPQGPGTK	19533.7	26219.5	38489.4	14309.4	9034.24		15050.9	25834.2	40555.5	11363	9879.96
A6NC98	CC88B_HUMAN	RSSLQSPASVAPPQGPGTK.3	RSSLQS[Ph]PASVAPPQGPGTK	12651.9	15515.1	24360.2	6879.31	5527.38		9437.17	15643.9	27787.3	5174.93	4618.43
A6NFI3	ZN316_HUMAN	GGDAKSPVLQEK.2	GGDAKS[Ph]PVLQEK	19108	37112.3	12012.3	5239.26	21497.6	18044.7	18378.1	36690.1	15664.5		25272.8	18792.3
A8MVU1;A6NI72;P14598	NCF1C_HUMAN;NCF1B_HUMAN;NCF1_HUMAN	PGPQSPGSPLEEER.2	PGPQS[Ph]PGS[Ph]PLEEER	61309.1		37157.7	6384.64	7340.6		52968.4	7397.67	49403.3	9597.73	6658.17
A8MVU1;A6NI72;P14598	NCF1C_HUMAN;NCF1B_HUMAN;NCF1_HUMAN	PGPQSPGSPLEEER.2	PGPQS[Ph]PGSPLEEER	52782.9	5099.75	26984.8	4456.83	7194.01		44193.1	5987.85	32723.5	4360.73	10677.4
A8MVU1;A6NI72;P14598	NCF1C_HUMAN;NCF1B_HUMAN;NCF1_HUMAN	PGPQSPGSPLEEER.2	PGPQSPGS[Ph]PLEEER	239097	51741.3	86422.5	14083.7	33989.9		184803	39617.1	68817.1	11596.7	30208
B2RTY4	MYO9A_HUMAN	SLEDLHQK.2	S[Ph]LEDLHQK	461.353		3455.47	759.796					2839.93	630.582
C9JLW8	F195B_HUMAN	SPPSSSEIFTPAHEENVR.3	S[Ph]PPSSSEIFTPAHEENVR	57163.8	81792.1	77273	68595.4	29022.8	84021.2	49631.7	81549.1	80015.7	53427.6	23566.4	81999.2
E9PAV3;Q13765	NACAM_HUMAN;NACA_HUMAN	VQGEAVSNIQENTQTPTVQEESEEEEVDETGVEVK.4	VQGEAVSNIQENTQTPT[Ph]VQEESEEEEVDETGVEVK	613752	533612	671319	459745	746868	375578	440654	469980	523711	513089	688324	438690
I3L1I5	YS060_HUMAN	SVPVSFYEIR.2	S[Ph]VPVSFYEIR	81985.1	21823.4	89534	10825.1		250537	57291.5	19754.3	87166.2		7854.92	229804
O00148	DX39A_HUMAN	NRSFSLK.2	NRS[Ph]FSLK	491.847		2265.35	2299.65	1227.04		1227.07	1233.96	5922.91	3132.13	588.694
O00161	SNP23_HUMAN	MDNLSSEEIQQR.2	[ac]MDNLS[Ph]SEEIQQR	15709.4		5457.77	13371.5	3440.89		18866.7	3143.36	4874.47	13047.6	3477.25
O00161	SNP23_HUMAN	TTWGDGGENSPCNVVSK.2	TTWGDGGENS[Ph]PC[cam]NVVSK	35004.2		4198.69	18221	8332.33		30845.5	4565.37	5163.14	23599.5	6782.37
O00178	GTPB1_HUMAN	LHGGFDSDCSEDGEALNGEPELDLTSK.3	LHGGFDS[Ph]DC[cam]S[Ph]EDGEALNGEPELDLTSK	131956	204444	136809	39828.7	328375	234837	147800	183385	119080	55981.2	193190	293979
O00193	SMAP_HUMAN	RSASPDDDLGSSNWEAADLGNEER.3	RS[Ph]ASPDDDLGSSNWEAADLGNEER	67584.5	108470	55484.6	83172.9	140413	49191	57961.9	105283	53407.8	72973	87216	42649.4
O00193	SMAP_HUMAN	SASPDDDLGSSNWEAADLGNEER.3	SAS[Ph]PDDDLGSSNWEAADLGNEER	1.28679e+06	1.28892e+06	962244	1.85093e+06	1.34708e+06	1.32213e+06	1.32942e+06	1.46806e+06	915138	1.61633e+06	1.46471e+06	1.21482e+06
O00203	AP3B1_HUMAN	NFYESDDDQKEK.2	NFYES[Ph]DDDQKEK	43461	62485.2	41739	41179.9	69113.6	31000.7	31208.7	61977.9	39780.6	57093.4	56408.5	30894.5
O00203	AP3B1_HUMAN	NFYESDDDQKEK.3	NFYES[Ph]DDDQKEK	1276.15	1721.16	2319.1	1946.21	4079.24	1543.52	1092.65	1300.33	2457.2	1283.64	999.431
O00264	PGRC1_HUMAN	EGEEPTVYSDEEEPKDESAR.2	EGEEPT[Ph]VYSDEEEPKDESAR	67523.1	118483	32226.4	92979.6	130142	42848.8	67250.7	70683	57971.9	134449	133426	32989.4
O00264	PGRC1_HUMAN	EGEEPTVYSDEEEPKDESAR.2	EGEEPTVYS[Ph]DEEEPKDESAR	74028.4	144452	36303.1	110421	151130	64104.5	75299	71506.6	63261	158160	150423	48881.4
O00264	PGRC1_HUMAN	EGEEPTVYSDEEEPKDESAR.3	EGEEPTVYS[Ph]DEEEPKDESAR	305632	368995	138694	378596	730695	156050	285145	299050	209078	518759	590890	161040
O00264	PGRC1_HUMAN	LLKEGEEPTVYSDEEEPKDESAR.3	LLKEGEEPTVYS[Ph]DEEEPKDESAR				18867	6093.34		9047.68	11882.6		39812.9	8935.07
O00273	DFFA_HUMAN	SISASKASPPGDLQNPK.3	SISASKAS[Ph]PPGDLQNPK	10906.2		2938.95	6265.62	6619.13	9443.02	12289.7	4192.42	5747.13	4997.23	8803.69
O00303	EIF3F_HUMAN	TCFSPNR.2	TC[cam]FS[Ph]PNR	12405.3	8029.77	56334.9	58288	29672.9	23936.4	20871.8	15104.2	61707.1	52206.6	20431	26395.7
O00418	EF2K_HUMAN	LEGVDGGQSPR.2	LEGVDGGQS[Ph]PR	15264		12816.7	5811.44	21623.5		14003.2		10912	5986.19	12831.9
O00429	DNM1L_HUMAN	SKPIPIMPASPQK.2	SKPIPIMPAS[Ph]PQK	159617	169897	207841	309300	328711	171980	186608	116723	213974	204414	270687	96974.1
O00429	DNM1L_HUMAN	SKPIPIMPASPQK.3	SKPIPIMPAS[Ph]PQK	24977.9	34838.5	32881.8	46015.4	28009.3	25728.3	30085.9	16069.7	37045.1	31663	47684.2	17407.4
O00443	P3C2A_HUMAN	SQSLNIR.2	S[Ph]QSLNIR	6038.3		4997.78	10440	2234.82	6936.33	7698.06	3434.34	4671.65	8442.21	3750.34	6805.14
O00499	BIN1_HUMAN	SPSPPDGSPAATPEIR.2	SPS[Ph]PPDGSPAATPEIR		153903						127484			1552.7
O00505	IMA4_HUMAN	NVPQEESLEDSDVDADFK.2	NVPQEESLEDS[Ph]DVDADFK	254593	356582	225642	473120	466106	364479	272216	364979	251830	516668	322366	438339
O00512	BCL9_HUMAN	IPVEGPLSPSR.2	IPVEGPLS[Ph]PSR	2516.56	21192.6	962.948		7296.81	37897	2855.88	25805.7			6059.83	35975.3
O00559	RCAS1_HUMAN	KLSGDQITLPTTVDYSSVPK.3	KLS[Ph]GDQITLPTTVDYSSVPK	265534	242513	93249.1	123618	145804	172590	274472	251722	104254	164672	118287	171000
O00566	MPP10_HUMAN	SDLRKSPVFSDEDSDLDFDISK.3	SDLRKS[Ph]PVFS[Ph]DEDS[Ph]DLDFDISK	105024	98044.3	168020	158968	16142.6	314432	102924	63626.4	131499	228764	113757	433389
O00567	NOP56_HUMAN	EELMSSDLEETAGSTSIPK.2	EELM[ox]S[Ph]SDLEETAGSTSIPK	18426.4	21013.8	12071.8	18908.1	193755	43800.3	25853.7	26562.6	15074.9	16846	37093.1	38734.5
O00567	NOP56_HUMAN	EELMSSDLEETAGSTSIPK.2	EELMS[Ph]S[Ph]DLEETAGSTSIPK	44838.1	60022.4	93296.6	54303.7	356365	112877	45049.3	273215	92014.1	50799.4	49805.7	131149
O00567	NOP56_HUMAN	EELMSSDLEETAGSTSIPK.2	EELMS[Ph]SDLEETAGSTSIPK	344447	398849	349468	337883	515511	460266	348809	390030	376642	278460	487650	439721
O00567	NOP56_HUMAN	EELMSSDLEETAGSTSIPK.2	EELMSS[Ph]DLEETAGSTSIPK	346942	401935	353299	340463	517065	464349	352481	392240	381543	288365	489549	445598
O00567	NOP56_HUMAN	EELMSSDLEETAGSTSIPK.3	EELMS[Ph]SDLEETAGSTSIPK	116236	89579.3	78263.8	71257.5	100941	100348	80525.5	87276.5	83256.1	51633.2	125392	85577.4
O00567	NOP56_HUMAN	EEPVSSGPEEAVGK.2	EEPVS[Ph]S[Ph]GPEEAVGK	131607	299698	320624	79274		382285	115338	175687	251001	83193.7		655213
O00567	NOP56_HUMAN	EEPVSSGPEEAVGK.2	EEPVSS[Ph]GPEEAVGK	114495	114006	158758	42323.7		95836	81876	95451.7	201994	50059.2		95434.1
O00567	NOP56_HUMAN	FSKEEPVSSGPEEAVGK.2	FSKEEPVS[Ph]S[Ph]GPEEAVGK	29246.3	53532.7	85093.2	16865.9		88143	31199.4	35772	72481.1	35694.7	7206.87	136758
O00567	NOP56_HUMAN	FSKEEPVSSGPEEAVGK.2	FSKEEPVS[Ph]SGPEEAVGK	15973.2	21486.8	20205.7	8342.25			13705.8	16162.3	20860.7	13226.7		22980.9
O00567	NOP56_HUMAN	KFSKEEPVSSGPEEAVGK.3	KFS[Ph]KEEPVSSGPEEAVGK	36548.1	17826.1	54475.4	24654.5		19007.4	44454.7	18224.2	51043.4	19025.4
O00567	NOP56_HUMAN	SFSKEELMSSDLEETAGSTSIPK.3	SFSKEELM[ox]S[Ph]SDLEETAGSTSIPK	17911.7	12314.7	12953.4	13905.5	66793.9	25265.3	23027.5	21721.7	7897.23	15267.2	29024.2
O00567	NOP56_HUMAN	SFSKEELMSSDLEETAGSTSIPK.3	SFSKEELMS[Ph]S[Ph]DLEETAGSTSIPK	45310.3	35079.9	71961	40165.3	12309.1	122284	57103.6	38904.7	56415.7	61714.6	35023.9	184342
O00567	NOP56_HUMAN	SFSKEELMSSDLEETAGSTSIPK.3	SFSKEELMS[Ph]SDLEETAGSTSIPK	384041	385725	261319	220948	297294	313247	402714	402909	274123	223122	429547	255726
O00567	NOP56_HUMAN	SFSKEELMSSDLEETAGSTSIPK.3	SFSKEELMSS[Ph]DLEETAGSTSIPK	360651	359225	245486	208814	281935	293339	377615	379836	258235	209671	405721	237157
O00629	IMA3_HUMAN	NVPHEDICEDSDIDGDYR.3	NVPHEDIC[cam]EDS[Ph]DIDGDYR	53432.7	16570.4	20293.8	55110.9	28511.4	16480	59407.7	35417.7	26237.8	77190	39049.7	22525.5
O14497	ARI1A_HUMAN	GPSPSPVGSPASVAQSR.2	GPS[Ph]PSPVGSPASVAQSR	181039	106037	144835	221856	207184	69584.3	175381	105704	151614	179383	142428	85692.9
O14497	ARI1A_HUMAN	SHHAPMSPGSSGGGGQPLAR.3	SHHAPMS[Ph]PGSSGGGGQPLAR	159924	167554	128674	150026	94613.1	120704	123586	167531	135192	144164	130804	104506
O14497	ARI1A_HUMAN	TLLDPGRFSK.2	TLLDPGRFS[Ph]K	19460	7331.81	6540.35	1492.28		3904.95	22308.2	13210	12600.2	4687.02	3841.81
O14497	ARI1A_HUMAN	TSPSKSPFLHSGMK.3	T[Ph]SPSKSPFLHSGMK	41719.9	18797.1	27222.6	33204.2	4727.69	15424.7	46047.4	25787.6	24595.3	30908.8	16125.2	15367.3
O14497	ARI1A_HUMAN	TSPSKSPFLHSGMK.3	TS[Ph]PSKSPFLHSGMK	44512.2	19704.7	29035.1	34182.7	6331.98	15673.8	48816.2	26971.6	26257.8	32920.3	17953.4	17681.7
O14545	TRAD1_HUMAN	ALPSLNTGSSSPR.2	ALPSLNTGS[Ph]SSPR	65042.4	164485	50504.9	218128	853474	176609	42370.3	118277	42695.7	192448	569587	143497
O14545	TRAD1_HUMAN	ALPSLNTGSSSPR.2	ALPSLNTGSS[Ph]SPR	66362.6	170626	52099.1	224991	857948	182593	44553.5	122106	45600.7	198273	592625	146450
O14545	TRAD1_HUMAN	LDSQPQETSPELPR.2	LDSQPQETS[Ph]PELPR	77372.1	168293	70740.9	320862	1.05779e+06	149286	71879.9	193275	83328.2	230639	914170	215219
O14578	CTRO_HUMAN	DKSPGRPLER.2	DKS[Ph]PGRPLER	7578.46	12321.1	13085.4	8524.03	10287.9	30141.1	7833.78	10462.8	14060.1	9062.28	8504.79	61455.8
O14578	CTRO_HUMAN	DKSPGRPLER.3	DKS[Ph]PGRPLER	7207.51	5606.03	25251.5	12320.4	6686.96	17886.2	9568.64	13025.6	22045.4	11417.5	4364.6	13198.8
O14579	COPE_HUMAN	RDSIVAELDR.2	RDS[Ph]IVAELDR			7727.22	7184.2	18121.2			5222.09	7164.74	5279.36	17812.8
O14617	AP3D1_HUMAN	HRPSEADEEELAR.3	HRPS[Ph]EADEEELAR	1382.66	202.013	2904.73	2053.22	639.95	2097.86	1006.26		1468.82
O14639	ABLM1_HUMAN	GVSMPNMLEPK.2	GVS[Ph]MPNMLEPK	94891.9	26425.1	18922.7	45299.2		6293.2	84698.9	22886.2	22401.8	41030		13214.5
O14639	ABLM1_HUMAN	RSSGREEDDEELLR.3	RS[Ph]SGREEDDEELLR	55493.1	11484.6	17376.6	16123.7		8597.93	52550	9727.21	10283.4	7403.5		5211.69
O14639	ABLM1_HUMAN	RSSGREEDDEELLR.3	RSS[Ph]GREEDDEELLR	37677.4	7798.47	10281.8	10933.6		4679.45	36251.1	7712.73	4944.09	4379.78	591.584	3706.1
O14639	ABLM1_HUMAN	STSQGSINSPVYSR.2	STS[Ph]QGSINSPVYSR	37934.5	14849.3	15786.8	15588.1	922.932	10517.7	32110.2	16497.7	12800.5	13572.3		7683.76
O14639	ABLM1_HUMAN	TASLPGYGR.2	TAS[Ph]LPGYGR	62638.4	11804.5	13371.2	23865.3		3968.44	68846.8	16461.7	9137.22	17276
O14646	CHD1_HUMAN	SPFEHSVEHK.2	S[Ph]PFEHSVEHK	7307.59	6923.04	9848.02	12682.3	12627.3	17745.3	8788.48	10591	7968.17	11680	9628.19	11876.1
O14646	CHD1_HUMAN	SPFEHSVEHK.3	S[Ph]PFEHSVEHK	2.46253	46.3399	526.821	1374.93	215.958	1492.99		4.04512	320.123
O14647	CHD2_HUMAN	ISGVQVNVK.2	IS[Ph]GVQVNVK	51717.1	47253.7	8433.41	77266	27733	40375.4	46923.9	89077.1	41002.1	187868	37907.7	41221.4
O14683	P5I11_HUMAN	KHSQTDLVSR.2	KHS[Ph]QTDLVSR		40682.8	1917.18	4889.68	85619.9	3633.68		41754.1		6366.76	95277.3
O14683	P5I11_HUMAN	KHSQTDLVSR.3	KHS[Ph]QTDLVSR		10947.7	2829.74	7598.8	30596.5	4743.66		35606.5	2932.98	5217.09	33998.8	5531.44
O14737	PDCD5_HUMAN	KVMDSDEDDDY.2	KVM[ox]DS[Ph]DEDDDY	4000.53		4693.57	3337.49	42440.3	7277.6	5046.33	2136.75	4399.3	4720.08	10998.3	6273.35
O14737	PDCD5_HUMAN	KVMDSDEDDDY.2	KVMDS[Ph]DEDDDY	107392	85528.5	116722	84915.2	180781	98581.9	87791.4	67169.7	118673	115915	119188	101792
O14745	NHRF1_HUMAN	EALAEAALESPRPALVR.3	EALAEAALES[Ph]PRPALVR	10072.7	17685.2	24737.5	67994.9	26957.8	32800.2	11768	21149.3	43745.2	60062.6	31111.2	25722.8
O14745	NHRF1_HUMAN	SASSDTSEELNSQDSPPK.2	S[Ph]ASSDTSEELNSQDSPPK	17776.3	69955.4	45520.4	37879	41180	61255.4	15224.1	31598.6	36876.5	38706.6	36789.2	60406.9
O14745	NHRF1_HUMAN	SASSDTSEELNSQDSPPK.2	SAS[Ph]SDTSEELNSQDSPPK	19917.7	78561.8	49311.7	41411.3	44538.2	65874.7	19665.9	35089.3	39856	45431.2	40422	67686
O14757	CHK1_HUMAN	VTSGGVSESPSGFSK.2	VTS[Ph]GGVSESPSGFSK	7433.12	21499.9	41806.3	37921.6			8727.93	21457.6	44835	46284.1	4860.48
O14828	SCAM3_HUMAN	KLSPTEPK.2	KLS[Ph]PTEPK	12058.1	3821.68	16277.8	25618.6	14416	7537.68	14694.7	8463.37	22300.2	20078.1	12319.3	9473.33
O14874	BCKD_HUMAN	STSATDTHHVEMAR.2	S[Ph]TSATDTHHVEMAR	29572.2	27519.1	19014.6	20738.8	59369	20628.1	41390.6	31128.9	23253.9	28615.6	59950.3	23960.9
O14874	BCKD_HUMAN	STSATDTHHVEMAR.2	ST[Ph]SATDTHHVEMAR	12205.3	9270.2	6861.94	8029.97	25630.4	7429.62	14567.4	10102.8	8884.49	9952.45	26132.2	7309.44
O14874	BCKD_HUMAN	STSATDTHHVEMAR.3	S[Ph]TSATDTHHVEM[ox]AR	7408.17	5901.19	5323.78	6925.35	15222	4054.29	6936.76	6626.19	4696.99	6889.06	28937
O14874	BCKD_HUMAN	STSATDTHHVEMAR.3	S[Ph]TSATDTHHVEMAR	105441	61273.8	88573.8	90808.2	165052	96169.7	154952	98133.6	101406	75967.3	178527	90496.3
O14929	HAT1_HUMAN	LISPYKK.2	LIS[Ph]PYKK	319.959		2127.04	1115.63	428.774		919.974	1553.9	2385.7	362.834
O14974	MYPT1_HUMAN	KTGSYGALAEITASK.2	KTGS[Ph]YGALAEITASK	172284	73230.1	102793	71039.9	121537	67462.3	182466	76579.8	101574	71198.8	123410	74780.1
O14974	MYPT1_HUMAN	KTGSYGALAEITASK.3	KT[Ph]GSYGALAEITASK	175647	80636.3	102401	69703	135415	85669.3	163828	86972.4	105561	58353.2	121910	88741.8
O14974	MYPT1_HUMAN	RLASTSDIEEK.2	RLAS[Ph]TSDIEEK	8827.74	3212.68	3114.62	4579.99	6024.93	13000	6186.06	3617.03	16416.2	5158.13	8001.06
O14974	MYPT1_HUMAN	RSTQGVTLTDLQEAEK.2	RST[Ph]QGVTLTDLQEAEK	9818.09	7569.52	10034.6	8616.2	9339.63		9866.51	6472.86	10852.3	8353.31	10181.3
O14974	MYPT1_HUMAN	RSTQGVTLTDLQEAEK.3	RST[Ph]QGVTLTDLQEAEK	57837.2	30614	39665.5	47649.5	58448.2	22548.4	50359	45733.3	49809	40269.1	54878
O14974	MYPT1_HUMAN	SGSYSYLEER.2	SGS[Ph]YSYLEER	86733.5	57297.7	141721	59129.8	83488.6	132423	86743.3	49941.3	103824	46626.4	54583.2	145394
O14974	MYPT1_HUMAN	TGSYGALAEITASK.2	T[Ph]GSYGALAEITASK	318146	149069	213442	155597	215553	204868	286746	148614	216309	107308	261788	213641
O14974	MYPT1_HUMAN	TGSYGALAEITASK.2	TGS[Ph]YGALAEITASK	347948	161274	233266	171900	237357	223208	314187	160814	233468	115089	288486	234480
O15014	ZN609_HUMAN	FCDSPTSDLEMR.2	FC[cam]DS[Ph]PTS[Ph]DLEMR	7180.58	8001.57	1923.99	4519.64	1419.76	19510.7	8182.18	4680.42	2809.45	5782.66	6913.46	23573.2
O15014	ZN609_HUMAN	LVEPHSPSPSSK.2	LVEPHS[Ph]PS[Ph]PSSK	27892.4	37518.9	34346.8	39939.8	17248.4	44246.6	31975.6	36665.1	25778.3	47916.5	28327.4	45975.2
O15014	ZN609_HUMAN	LVEPHSPSPSSK.2	LVEPHS[Ph]PSPSSK	10733.1	11222.5	8161.83	12006.8	10980.5		9449.27	11659.7	8837.43	8701.4	13037.9
O15027	SC16A_HUMAN	SLHSAHSLASR.3	S[Ph]LHSAHSLASR	2119.85	859.261	3803.19	7809.35	2735.01		3391.94	4492.88	2764.03	4586.28	1976.38
O15042	SR140_HUMAN	EKDECTPTRK.2	EKDEC[cam]T[Ph]PTRK	6238.98	5546.18	6364.33	4240.29	9407.04		5234.96	8054.44	5911.96	3913.4	7475.48
O15042	SR140_HUMAN	ESLCDSPHQNLSR.2	ESLC[cam]DS[Ph]PHQNLSR	5679.68	9604.73	5013.95	6910.02	8496.17	4135.44	4185.12	5855.8	6620.07	3883.96	6526.46
O15042	SR140_HUMAN	ESLCDSPHQNLSR.3	ESLC[cam]DS[Ph]PHQNLSR	4684.87	3852.49	10168	8257.33	7631.4		4369.09	4550.97	10952.1	3849.75	3688.65	2289.96
O15042	SR140_HUMAN	LYSILQGDSPTK.2	LYSILQGDS[Ph]PTK	7526.48	5531.03	10624.6	29657.5	22936.1		7800.6	7144.98	11362.3	21061.1	21737.5
O15042	SR140_HUMAN	RVKSPSPK.2	RVKS[Ph]PS[Ph]PK	17790.3	20694.9	17395	21224.9	21425.6	24104.7	19792.4	26510.7	15976.1		19221.8	17225.4
O15042	SR140_HUMAN	TRPKSPR.2	TRPKS[Ph]PR	14877.3	13727.7	10821.1	14683.1		5226.73	10242.3	16235.9	11162	700.268	14473.4	2848.23
O15042	SR140_HUMAN	VKSPSPK.2	VKS[Ph]PS[Ph]PK						538.634			1226.71			7651.59
O15042	SR140_HUMAN	VKSPSPKSER.2	VKS[Ph]PS[Ph]PKS[Ph]ER	2486.73	1970.64	2059.92	1892.08	2942.86		3792.47	4559.07	2282.74	3499.53	3547.75
O15047	SET1A_HUMAN	DTGSEVPSGSGHGPCTPPPAPANFEDVAPTGSGEPGATRESPK.4	DTGSEVPS[Ph]GSGHGPC[cam]TPPPAPANFEDVAPTGSGEPGAT[Ph]RESPK	36839.7	46565.7	37538	28754.7	54297.8	77184.5	23736.4	37749	35543	34847.2	41797.6	100249
O15047	SET1A_HUMAN	SGSPAPETTNESVPFAQHSSLDSR.3	SGS[Ph]PAPETTNESVPFAQHSSLDSR	24146.6	39308.6	20278.6	20834.4	52086.8	40613.2	25219.9	35810	22540.2	22371.1	34117.9	39845.9
O15067	PUR4_HUMAN	SPNRDFLTHVSAR.3	S[Ph]PNRDFLTHVSAR	28902.2	57853.3	34300.1	50235.5	18564.8	57238.1	23636.8	50945.8	39892.6	73436.8	55287.7	64910.4
O15127	SCAM2_HUMAN	AASSAAQGAFQGN.2	AAS[Ph]SAAQGAFQGN	24048.7	77918.4	48249.8	38792.4	87895.2	52066.4		38151	21563.6	16082.4	10855.4	44200
O15127	SCAM2_HUMAN	AASSAAQGAFQGN.2	AASS[Ph]AAQGAFQGN	23831.5	78826.3	47532.7	65662.7	89480.5	52364.1	14988.9	51031.6	21771.8	33992.3	38699.7	44808.3
O15164	TIF1A_HUMAN	LKSIEER.2	LKS[Ph]IEER	4303.29	1378.84	6842.68	2930.15	3862.36	20335.9	4824.84	1732.84	6083.07	1733.21	2085.58	5044.8
O15173	PGRC2_HUMAN	LLKPGEEPSEYTDEEDTKDHNK.4	LLKPGEEPSEYT[Ph]DEEDTKDHNK	8091.51	5121.76		12622.2	20381.6		16665.4	22181.9		13534.1	34043.3
O15234	CASC3_HUMAN	STVTGERQSGDGQESTEPVENK.3	STVTGERQS[Ph]GDGQESTEPVENK	20264.4	26747	18637.2	11720.3	28005	21239.2	18525.7	22216.5	17322	14562.7	38953.9	28039.9
O15372	EIF3H_HUMAN	EKDFSPEALKK.3	EKDFS[Ph]PEALKK	2186.25		2705.51	2195.46	1568.76		2418.03	1636.18	2878.98	1454.16	2204.38
O15427	MOT4_HUMAN	LHKPPADSGVDLR.3	LHKPPADS[Ph]GVDLR	91.191			2337.27				126.576		1206.13
O15523;O00571	DDX3Y_HUMAN;DDX3X_HUMAN	FSGGFGAR.2	FS[Ph]GGFGAR	6670.47	3126.59	15085.4	8416.74	3847.67		5434.18	4000.14	18130.1	12806.4	3163.24	14852
O15541	R113A_HUMAN	AAYGDLSSEEEEENEPESLGVVYK.3	AAYGDLS[Ph]S[Ph]EEEEENEPESLGVVYK	155318	269957	143926	347025	235831	307332	160853	229216	123280	424286	248520	387456
O15541	R113A_HUMAN	AEQLSPGK.2	[ac]AEQLS[Ph]PGK	5972.2	6116.34	11741.3	18462.9	7844.75	18497.4	4465.13	6779.69	10041.1	14264.4	2483.5	5020.75
O43149	ZZEF1_HUMAN	GDREEEVERPVSSPGDPEQK.3	GDREEEVERPVS[Ph]SPGDPEQK	24905.9	34450.6	18779.7	27156.4	49686		17617.9	18850.2	19833	33902.2	67530.1	15691.3
O43149	ZZEF1_HUMAN	GDREEEVERPVSSPGDPEQK.3	GDREEEVERPVSS[Ph]PGDPEQK	26641.1	34183.5	18640	27411.9	49682.5		17560.7	19533.8	19999.3	34445.4	65483.8
O43164	PJA2_HUMAN	NHGSSPEQVVRPK.3	NHGS[Ph]SPEQVVRPK	3039.99	688.345	6087.57	6523.08	2317.32		2677.05	2925.04	5521.73	4612.56	2259.91
O43290	SNUT1_HUMAN	RVSEVEEEKEPVPQPLPSDDTR.3	RVS[Ph]EVEEEKEPVPQPLPSDDTR	87076.2	68213.5	74579	72615.7	114965	115478	43444.3	18905.3	48629.8	27097.3	43251.7	41666.4
O43303	CP110_HUMAN	LPSPEPSMSPK.2	LPSPEPS[Ph]MSPK	4149.69		1178.59	1124.7		2391.74	5621.26	1806.04			933.417
O43314	VIP2_HUMAN	HFFHHADEDDEEEDDSPPER.3	HFFHHADEDDEEEDDS[Ph]PPER				19299	113404			20918.7		30801.3	54998.8
O43314	VIP2_HUMAN	SGEQITSSPVSPK.2	S[Ph]GEQITSSPVSPK	43664.8	62771			18968.4	26548.2	55080.4	78962.3		2958.79	22248.1	37718.1
O43318	M3K7_HUMAN	MSADMSEIEAR.2	MS[Ph]ADMSEIEAR	4816.38		11460.6	3207.7	1426.67		3410.13		14387.7		2540.39
O43318	M3K7_HUMAN	SIQDLTVTGTEPGQVSSR.2	S[Ph]IQDLTVTGTEPGQVSSR	141498	136523	162580	91975.4	130482	172703	142833	98255	132280	83889.1	93139.5	205014
O43395	PRPF3_HUMAN	GDDDEESDEEAVKK.2	GDDDEES[Ph]DEEAVKK	46996.5	56870.4	82909.6	41429.1	66202.3	47370	38888.8	41847.1	64678.2	35635.4	71887.1	47004.3
O43395	PRPF3_HUMAN	WDEQTSNTKGDDDEESDEEAVKK.3	WDEQTSNTKGDDDEES[Ph]DEEAVKK	11119.9	11458.2	11153.9		12692	3688.21	8946.02	9430.56	9340.46		21030.9
O43399	TPD54_HUMAN	GLLSDSMTDVPVDTGVAAR.2	GLLSDS[Ph]MTDVPVDTGVAAR	24380.5	10159.2	27519.9	22585.8	37119.9	15057.3	29366.2	17796.3	36503.3	22835.3	52483.8	17941.5
O43399	TPD54_HUMAN	MDSAGQDINLNSPNK.2	[ac]MDSAGQDINLNS[Ph]PNK	66872.6	86984.6	105530	123845	197860	94982.6	49046.9	65312.4	85768.1	126195	141743	98632.3
O43399	TPD54_HUMAN	NSATFKSFEDR.2	NSAT[Ph]FKSFEDR	8467.11	9112.61	23713	10936.1	14158.6	23083.2	7398.47	4253.01	12288.4	1439.52	10668.9	11719.1
O43399	TPD54_HUMAN	NSATFKSFEDR.2	NSATFKS[Ph]FEDR	14393.7	13574.6	34212.2	19132.4	21100.4	36926.4	11108.2	6120.08	18369.5	8901.2	16865.8	18633.4
O43432	IF4G3_HUMAN	GGSSKDLLDNQSQEEQR.2	GGS[Ph]SKDLLDNQSQEEQR		10198.7	9489.28	5196.83	9983.78	9819.7		3776.08	10025.7	5804.98	10419.9	5857.42
O43432	IF4G3_HUMAN	RSPVPAQIAITVPK.2	RS[Ph]PVPAQIAITVPK	30153.8	14107		24990.4	24974.5	11403.4	34844.5	24977.9		24749.2	32736.5	9354.19
O43439	MTG8R_HUMAN	VCTISPAPR.2	VC[cam]TIS[Ph]PAPR			1115.88	8890.25	1075.93		523.72	1437.75				1423.4
O43463	SUV91_HUMAN	MDSNFGLAGLPGSPK.2	MDSNFGLAGLPGS[Ph]PK	13402.6	25361.2	68034.2	50395.8	18874.7	19739.7	10894.1	29800.7	74906.5	39095.8	21017.7	23531.3
O43491	E41L2_HUMAN	EVRSPTKAPHLQLIEGK.4	EVRS[Ph]PTKAPHLQLIEGK		1254.06	1686.61	4990.19		320.192		2287.74	2735.32	5773.51
O43491	E41L2_HUMAN	EVRSPTKAPHLQLIEGK.4	EVRSPT[Ph]KAPHLQLIEGK		1229.67	2020.8	6203.01		489.491		1389.14	3306.14	7279.07	437.076
O43491	E41L2_HUMAN	QKSYTLVVAK.2	QKS[Ph]YTLVVAK	87.132		17568.7	3112.02	114.247	4737.21	492.047	815.878	16803.4	2723.23	2320.45	4860.29
O43491	E41L2_HUMAN	SPTKAPHLQLIEGK.3	S[Ph]PTKAPHLQLIEGK		8300.19	15103.6	19927.4		9511.33		4976.09	14620.7	21776.8
O43491	E41L2_HUMAN	SPTKAPHLQLIEGK.3	SPT[Ph]KAPHLQLIEGK		7689.81	12274.9	15600.1		7685.35		4108.43	12126.3	17329
O43491	E41L2_HUMAN	SYTLVVAK.2	S[Ph]YTLVVAK		4889.75	39017.6	6308.59		18376.2		4145.35	33563	4811.63		19529.8
O43516	WIPF1_HUMAN	NLSLSSSTPPLPSPGR.2	NLS[Ph]LSSSTPPLPSPGR	63614.9	42976	141546	58845.1	9446.34	21320.6	51013.5	43820	85823.1	50987.8	8459.37
O43521	B2L11_HUMAN	RSSLLSR.2	RSS[Ph]LLSR	13282		2417.77	4068.46			14973.9		1581.49	2322.8
O43566	RGS14_HUMAN	SLGSTEGESESRPGK.2	S[Ph]LGSTEGESESRPGK	45032.8	56292.1	26594.3	22097.2	12512.5	18608.3	41298.5	28330.2	21837.4	20399.7	17842.5	30633.8
O43583	DENR_HUMAN	LTVENSPK.2	LTVENS[Ph]PK	1949.58		9745.95	2159.24	2240.74		797.081		1476.65	938.301	1182.6
O43598	DNPH1_HUMAN	SESWER.2	SES[Ph]WER	305.733	436.848		396.087	229.728	178.197	480.552	472.591		285.442	49.6691
O43683	BUB1_HUMAN	DGKFSPIQEK.2	DGKFS[Ph]PIQEK	11903.8		14227.7	15487.1	11219.2	35285.5	8414.94	5740.94	16086.8	13400.4	6783.42	28310.6
O43683	BUB1_HUMAN	DGKFSPIQEKSPK.2	DGKFS[Ph]PIQEKS[Ph]PK	4464.11		5604.58	5843.28	2301.74	19508.2	4026.41		6349.46	10739.8	3183.14
O43719	HTSF1_HUMAN	DLDEEGSEKELHENVLDK.3	DLDEEGS[Ph]EKELHENVLDK	29460.9	32166.2	85374.6	63813.3	34362.9	31077.1	25934.8	25674.9	87185.1	39370.1	22241.1	26567.3
O43719	HTSF1_HUMAN	ESSPEKEAEEGCPEK.2	ES[Ph]SPEKEAEEGC[cam]PEK	12278.1	21100.8	25527.7	20359.6	23962.9	17376.8	9067.31	15823.7	30696.3	18516	23228.6
O43719	HTSF1_HUMAN	ESSPEKEAEEGCPEK.2	ESS[Ph]PEKEAEEGC[cam]PEK	14536.8	23606.4	28956.6	20835.6	25242	16851.4	11078.9	19304.4	33764.5	19384.8	24891.1	28005.1
O43719	HTSF1_HUMAN	ESSPEKEAEEGCPEKESEEGCPK.3	ES[Ph]SPEKEAEEGC[cam]PEKESEEGC[cam]PK	87927.4	120792	135547	66555.7	103831	64823.4	64344.2	87649	103070	99323.6	109443	70386.1
O43719	HTSF1_HUMAN	ESSPEKEAEEGCPEKESEEGCPK.3	ESS[Ph]PEKEAEEGC[cam]PEKESEEGC[cam]PK	100393	136032	156200	74367.8	115715	66601.2	73440.7	99764.4	117930	110624	109650	78570.2
O43719	HTSF1_HUMAN	GSEEDSPKKESK.2	GSEEDS[Ph]PKKESK		2190.9	980.384	6280.46			1343.15		585.422
O43719	HTSF1_HUMAN	GSEEDSPKKESK.3	GSEEDS[Ph]PKKESK		3851.25		2030.06			2885.23
O43719	HTSF1_HUMAN	HFSEHPSTSK.2	HFS[Ph]EHPSTSK		2707.82	488.241	8800.96	5620.19	870.149		2794.16		3810.69	4719.62
O43719	HTSF1_HUMAN	HFSEHPSTSK.3	HFS[Ph]EHPSTSK			4524.86	6598.55	2719.69	2572.16	2270.67	2110.65	4734.56	3287.52	1507.07
O43719	HTSF1_HUMAN	LFEDDDSNEK.2	LFEDDDS[Ph]NEK	2974.58	2225.77	9673.17	5516.98	14248.6	6444.98	1329.72	3150.24	12482	1948.31	5471.44	3529.39
O43719	HTSF1_HUMAN	LFEESDDKEDEDADGKEVEDADEK.3	LFEES[Ph]DDKEDEDADGKEVEDADEK	66585	85022.6	180997	169412	166217	57665.6	51375.2	58163.8	265268	89159.8	72681.1	64063.1
O43719	HTSF1_HUMAN	RSDSVSASER.2	RSDS[Ph]VSASER	18885.9		16912.8	20949.6		12957.8	15081.6	9307.76	20288.1	22553.5	20973.7	5926.14
O43719	HTSF1_HUMAN	VFDDESDEKEDEEYADEK.2	VFDDES[Ph]DEKEDEEYADEK	49137.8	59810.4	112603	81405.1	105997	36051.5	38535.8	55064.9	119075	63648.3	56917.4	40168.5
O43719	HTSF1_HUMAN	VFDDESDEKEDEEYADEK.3	VFDDES[Ph]DEKEDEEYADEK	75647.5	86323.1	154686	124618	187647	64408	49301	69948.9	178342	79418	88203	48165.1
O43765	SGTA_HUMAN	EMPQDLRSPARTPPSEEDSAEAER.4	EMPQDLRS[Ph]PART[Ph]PPSEEDSAEAER	110378	23531.9	25624.7	68055.4	167985	136601	119333	53379.8	34142.5	80532.1	181623	109844
O43765	SGTA_HUMAN	SRTPSASNDDQQE.2	SRTPS[Ph]ASNDDQQE	2525.87	3828.8	2604.03	2673.12	9078.01	3739.95	4207.43	3190.25	1803.9	2999.69	10466.1	1784.13
O43768	ENSA_HUMAN	KSSLVTSK.2	KSS[Ph]LVTSK	101861	22092.5	332421	50608.8	73202.6	56062.8	87246.8	26173.2	259905	20347.2	117060	40945.2
O43768	ENSA_HUMAN	SQKQEEENPAEETGEEK.2	[ac]S[Ph]QKQEEENPAEETGEEK	13744.5		17100.6	18302.5	51874.6				26637.4	26835.8	27998.9
O43768	ENSA_HUMAN	SSLVTSK.2	SS[Ph]LVTSK	7984.65		22277.5	3234.9	5902.03	4342.88	6793.38	2431.68	15679.1		4660.6	3216.37
O43818	U3IP2_HUMAN	MNEEISSDSESESLAPR.2	MNEEIS[Ph]S[Ph]DS[Ph]ESESLAPR	164757	354779	330694	347535	69440.5	873522	184730	389855	301040	483789	416538	1.19171e+06
O43818	U3IP2_HUMAN	MNEEISSDSESESLAPR.2	MNEEIS[Ph]SDS[Ph]ESESLAPR	23800.8	161193	157515	190267	35710.2	357491	87744.5	160244	147908	272941	214662	569833
O43823	AKAP8_HUMAN	SGDEEFKGEDELCDSGR.2	S[Ph]GDEEFKGEDELC[cam]DSGR	29122.6	32340.8	17574.6	22096.5	74897.4	34148.4	27303.4	27066.6	22695.1	25387.2	23491.6	58430.1
O43823	AKAP8_HUMAN	SGDEEFKGEDELCDSGR.3	S[Ph]GDEEFKGEDELC[cam]DSGR	17072.8	19972.4	11028.2	10569.6	25661.6	23059.5	11229.4	17866.2	12760.4	9080.51	18103.9	29937.5
O43823	AKAP8_HUMAN	VDSEGDFSENDDAAGDFR.2	VDS[Ph]EGDFS[Ph]ENDDAAGDFR	38918	86758	60414.4	35463.2	140172	91798.9	44767.6	64410.8	54865.1	41878.7	40811.6	105999
O43847	NRDC_HUMAN	RGSLSNAGDPEIVK.2	RGS[Ph]LSNAGDPEIVK	347239	251338	326883	372999	688469	184711	362091	240343	367025	344168	577648	220881
O43847	NRDC_HUMAN	RGSLSNAGDPEIVK.3	RGS[Ph]LSNAGDPEIVK	31302.6	25004.4	36328	40459.6	52689.8	27841.2	40151.3	35796.8	39920.4	32129.6	61175.1	29119.9
O43933	PEX1_HUMAN	SQSGEDESMNQPGPIK.2	S[Ph]QSGEDESMNQPGPIK	7912.08	4942.88	8253.22	20580	7928.17	5632.61	6151.82	4344.21	8718.8	20954.3	14983.1	6843.26
O43933	PEX1_HUMAN	SQSGEDESMNQPGPIK.2	SQS[Ph]GEDESMNQPGPIK	7955	4672.17	7229.79	18937.8	7241.08	5450.33	5865.68	4423.06	7637.04	18773.6	13341.9	7043.17
O60231	DHX16_HUMAN	LLEDSEESSEETVSR.2	LLEDS[Ph]EES[Ph]SEETVSR	219077	367647	195818	217442	410866	298295	184193	386879	187131	244481	282260	439618
O60231	DHX16_HUMAN	LLEDSEESSEETVSR.2	LLEDS[Ph]EESS[Ph]EETVSR	187913	332166	174431	192840	358430	265524	164939	340335	167441	232710	253020	392989
O60244	MED14_HUMAN	KLSDDPCPVESK.2	KLS[Ph]DDPC[cam]PVESK	8395.52	34373	12121.1	20385.5	14848.5	11920.9	6722.86	20517.4	12283	21539.1	15717.5	14824.7
O60256	KPRB_HUMAN	HSPPMVR.2	HS[Ph]PPMVR	18865.4	7802.38	27158.8	53728.1	20476.8	19890.7	22160.3	16666.8	36032.1	27105	23771.6	11497.8
O60264	SMCA5_HUMAN	TPTSPLK.2	TPTS[Ph]PLK	4856.57	3373.04	15752.2	12267.8	6406.02	6026.76	7605.72	7765.44	21150.4	9805.63	2777.44	2453.13
O60271	JIP4_HUMAN	LHQLSGSDQLESTAHSR.3	LHQLS[Ph]GSDQLESTAHSR	4612.36		10363.4	12137	4130.59		4726.04	2701.09	8287.94	10089	3785.31
O60271	JIP4_HUMAN	SASQSSLDKLDQELK.2	SASQS[Ph]SLDKLDQELK	10119.7	3675.27	3457.46	6200.44	9560.21	6346.42	9468.21	3299.65	3605.61	6658.13	10485.4	9198.13
O60271	JIP4_HUMAN	SASQSSLDKLDQELK.3	SAS[Ph]QSS[Ph]LDKLDQELK	28999.1	20585.5	14693.9	16143.5	23661.2	63312.9	27101.1	19478.6	13585.7	15243.6	28023.3	59956.2
O60271	JIP4_HUMAN	SASQSSLDKLDQELK.3	SASQS[Ph]S[Ph]LDKLDQELK	25182.7	19014	12479.5	13634.5	20341.8	53608.5	23108.7	16339.6	11904.7	13324.1	23780.7	50631.2
O60271	JIP4_HUMAN	SASQSSLDKLDQELK.3	SASQS[Ph]SLDKLDQELK	6136.45		1955.04	3536.14	6582.81	5005.27	6019.52	2852.05	2801.97	2728.82	7541.54	5626.69
O60293	ZC3H1_HUMAN	KPISDNSFSSDEEQSTGPIK.3	KPISDNSFS[Ph]S[Ph]DEEQSTGPIK	19850.2	26420.8	18863	23796	27142.7	38691.2	21505.6	32600.9	14704	27748.4	19923.3	64398.7
O60293	ZC3H1_HUMAN	LDSSPVSSPR.2	LDS[Ph]SPVSSPR	5837.33	3230.8	1512.87	7180.95	5397.17	4889.98	5411.76	7449.61	4406.71	8876.49	6309.59
O60293	ZC3H1_HUMAN	LDSSPVSSPR.2	LDSS[Ph]PVS[Ph]SPR	3779.78		5795.25	447.234		2267.55			4382.59		1851.32	4920.79
O60293	ZC3H1_HUMAN	LDSSPVSSPR.2	LDSS[Ph]PVSSPR	4780.31	2792.77	3224.47	6145.34	3457.15	8988.31	4655.53	5991.09	3625.19	7534.67	5719.09
O60293	ZC3H1_HUMAN	RISTSDILSEK.2	RIS[Ph]TSDILSEK	13703.9		9227.51	9203.1	3290.11	4915.02	10598.5		6452.92	7139.26	3400.5	5249.88
O60318	GANP_HUMAN	SSPVKKPSLLK.3	S[Ph]SPVKKPSLLK	1628.18		2417.97	2347.41			1130.7	1827.46	2617.29	2584.23	1001.45	795.662
O60508	PRP17_HUMAN	SPSSKPSLAVAVDSAPEVAVK.3	S[Ph]PSSKPSLAVAVDSAPEVAVK	75271.5	59264.7	76683.2	44827.2	40193.3	75116.6	60325.4	53568	48477.3	42971.1	35874.9	70256.8
O60508	PRP17_HUMAN	SPSSKPSLAVAVDSAPEVAVK.3	SPS[Ph]SKPSLAVAVDSAPEVAVK	87435.6	67656.3	89074.8	53349.6	47179.9	87688.1	69585.5	61010.5	57415.5	50741.1	41855	78238
O60566	BUB1B_HUMAN	KLSPIIEDSR.2	KLS[Ph]PIIEDSR	2749.43	2051.33	15037.8	90009.4	2434.25	3751.22	2503.56	2538.48	12198.1	89656.9	1758.97
O60566	BUB1B_HUMAN	KNKSPPADPPR.3	KNKS[Ph]PPADPPR	2476	2461.55	8114.61	39043.9	9882.86	3052.98	8681.66	6192.84	11564.2	36721.6	6214.94
O60566	BUB1B_HUMAN	NKSPPADPPR.2	NKS[Ph]PPADPPR	3006.01		7246.1	58116	4515.52	5228.45		1337.93	9307.27	66699.8	10217.6	1174.22
O60641	AP180_HUMAN	AVCKATTHEVMGPKK.3	AVC[cam]KAT[Ph]THEVMGPKK	8662.61	9543.04	9929.23	8171.5	12731.3	6824.56	11565.8	9680.42	7146.51	12993.2	4473.91	3201.5
O60684	IMA7_HUMAN	METMASPGKDNYR.2	[ac]METMAS[Ph]PGKDNYR	9986.06	9292.1	10665.1	15549.9	6460.05	6711.92	9027.22	9128.23	11066.4	19932.4	3618.81	7189.25
O60749	SNX2_HUMAN	SMSAPVIFDR.2	SMS[Ph]APVIFDR	40890.3	49035.2	29697.1	24661.3	29636.9	54687.9	36606.8	26719.1	17353	18798.9	35337.1	35354.2
O60759	CYTIP_HUMAN	SSSLSDFSWSQR.2	SSS[Ph]LSDFSWSQR	25947.7	11853.6	17638.9	53918.6	77358.1	30753.5	26328.7	20772.7	21417.9	60694.4	81228.3	30323
O60762	DPM1_HUMAN	ASLEVSRSPR.2	[ac]ASLEVS[Ph]RSPR	41566	23568.9	38818	33065.8	34149.5	16796.3	50190.7	32706.2	48051.4	44490.2	37213.5	17537.3
O60762	DPM1_HUMAN	ASLEVSRSPR.2	[ac]ASLEVSRS[Ph]PR	52904.7	29413.4	51425.3	46487.1	43075.4	34692	65748.6	42243.7	62601.7	54242.6	49083.6	22712.9
O60825	F262_HUMAN	RNSFTPLSSSNTIR.3	RNS[Ph]FTPLSSSNTIR	16846.1			2317.1	7300.73		9632.52	3.15484			5074.72
O60832	DKC1_HUMAN	AGLESGAEPGDGDSDTTK.2	AGLES[Ph]GAEPGDGDS[Ph]DTTK	46700.8	60016.2	36870.4	24984.1	47954.3	111331	40636.9	68558	50461.1	60392	49352.6	146587
O60832	DKC1_HUMAN	AGLESGAEPGDGDSDTTK.2	AGLESGAEPGDGDS[Ph]DTTK	414798	708468	362335	150854	769739	539943	271320	399938	304813	186929	367474	520515
O60832	DKC1_HUMAN	AGLESGAEPGDGDSDTTK.2	AGLESGAEPGDGDSDTT[Ph]K	403438	689658	353047	147731	747596	526279	263748	389696	296859	182908	357484	507509
O60832	DKC1_HUMAN	AGLESGAEPGDGDSDTTKK.2	AGLESGAEPGDGDS[Ph]DTTKK	87384.5	142444	54649.6	49500	84042.9	85183	74984.6	94266.4	71690	63326.9	110280	80867.3
O60832	DKC1_HUMAN	AGLESGAEPGDGDSDTTKK.3	AGLESGAEPGDGDS[Ph]DTTKK	25107.4	32265.2	21122.2	12550.2	35250.6	25851.8	20147.4	25593.8	22172.3	14489.6	32383.7	23855.5
O60832	DKC1_HUMAN	AGLESGAEPGDGDSDTTKK.3	AGLESGAEPGDGDSDT[Ph]TKK	18648.1	25424.1	15322.7	8494.78	25592.7	20609.8	14716.6	19061	15302	11186.9	23573.4	20056.5
O60832	DKC1_HUMAN	AKEVELVSE.2	AKEVELVS[Ph]E	160178	116055	173379	153526	165679	205840	212287	213407	162654	196081	141911	289121
O60832	DKC1_HUMAN	EVELVSE.1	EVELVS[Ph]E	1.30709e+06	1.12557e+06	1.70204e+06	968383	1.51972e+06	1.82856e+06	1.37713e+06	1.19086e+06	1.90154e+06	1.53029e+06	1.05013e+06	2.56522e+06
O60832	DKC1_HUMAN	EVELVSE.2	EVELVS[Ph]E	3171.45	9573.89	6132.61	1725.15	8556.88	24125	4976.26	12821.5	6372.94	3070.76	7350.59	27030.8
O60832	DKC1_HUMAN	KRESESESDETPPAAPQLIK.3	KRES[Ph]ES[Ph]ES[Ph]DETPPAAPQLIK	606008	989968	398326	271382	47126.4	2.37927e+06	626685	797899	463429	417234	657577	3.30357e+06
O60832	DKC1_HUMAN	KRESESESDETPPAAPQLIK.3	KRES[Ph]ES[Ph]ESDETPPAAPQLIK	736117	627593	938222	335444	901756	1.1325e+06	677190	522824	766228	413564	578213	1.10006e+06
O60841	IF2P_HUMAN	KQSFDDNDSEELEDKDSK.2	KQSFDDNDS[Ph]EELEDKDSK	49388.5	81226.9		50121.7	87555.2	55171.4	41543.7	19624.2	40873.7	80143.6	96441.6
O60841	IF2P_HUMAN	KQSFDDNDSEELEDKDSK.3	KQS[Ph]FDDNDS[Ph]EELEDKDSK	21638.2	35198	29811.4	70797.5	154679	30095.9	81857.4	52037.3	27250.7	99959.2	128115	25363.1
O60841	IF2P_HUMAN	KQSFDDNDSEELEDKDSK.3	KQSFDDNDS[Ph]EELEDKDSK	101470	41397.1	70309.2	98078.2	190640	82011.1	110789	66775.8	75878.8	137363	181956	76799.7
O60841	IF2P_HUMAN	NKPGPNIESGNEDDDASFK.2	NKPGPNIES[Ph]GNEDDDASFK	1.16932e+06	650217	1.06989e+06	1.10129e+06	1.1348e+06	810565	1.21742e+06	634867	1.14443e+06	1.63256e+06	1.26906e+06	1.0485e+06
O60841	IF2P_HUMAN	NKPGPNIESGNEDDDASFK.3	NKPGPNIES[Ph]GNEDDDASFK	791377	394814	741185	659176	909098	640764	895726	484934	687417	1.02285e+06	913990	755392
O60841	IF2P_HUMAN	QSFDDNDSEELEDKDSK.2	QSFDDNDS[Ph]EELEDKDSK	26989.5		23789.2	34252.4	27724.5		42259.7	23561.9	24824.9	43545.3	21430.8
O60841	IF2P_HUMAN	QSFDDNDSEELEDKDSK.3	QSFDDNDS[Ph]EELEDKDSK	5290.13		3882.3	3202.3	4200.58		3293.5	496.483	4050.44	4293.21	3106.21
O60841	IF2P_HUMAN	VEMYSGSDDDDDFNK.2	VEMYS[Ph]GS[Ph]DDDDDFNK	25854.7	10343	29615.8	26469	28059.7	26077.6	21751.1	6117.61	28003.5	30467.3	25791.9	33034.6
O60841	IF2P_HUMAN	VEMYSGSDDDDDFNKLPK.2	VEMYS[Ph]GS[Ph]DDDDDFNKLPK	170956	118853	250184	220716	218597	304029	168312	106284	236640	260257	231163	228978
O60841	IF2P_HUMAN	VEMYSGSDDDDDFNKLPK.3	VEM[ox]YS[Ph]GS[Ph]DDDDDFNKLPK	13393.2	9830.12	23730.8	15198.5	41729.2	36368.4	15616.5	7634.66	15121.9	15682.6	16459.7	41025.3
O60841	IF2P_HUMAN	VEMYSGSDDDDDFNKLPK.3	VEMYS[Ph]GS[Ph]DDDDDFNKLPK	170496	123566	226870	199148	172994	332056	166996	111772	199964	205806	228634	244456
O60841	IF2P_HUMAN	WDGSEEDEDNSK.2	WDGS[Ph]EEDEDNSK	42407.2	18720.8	25732.2	14602.3	63350.7	14643.1	26973.5	12853	21838.9	18156	23861	18620
O60841	IF2P_HUMAN	WDGSEEDEDNSKK.2	WDGS[Ph]EEDEDNSKK	13229.4		9262.73	8892.99	19636.8	6727.22	10400.9		12422.3	11364.4	15165.1
O60885	BRD4_HUMAN	IHSPIIR.2	IHS[Ph]PIIR	32276.6	10576	27266.1	17567.6	34015.5	20350.6	42345.8	27406.4	37784.3	18982.8	35911.8	10754.6
O60885	BRD4_HUMAN	MPDEPEEPVVAVSSPAVPPPTK.3	MPDEPEEPVVAVS[Ph]SPAVPPPTK	81612.7	83223.4	63366.9	76447.8	62342.3	62122.4	82097.8	102182	94124.2	54946.7	89414.9
O60927	PP1RB_HUMAN	AFGESSTESDEEEEEGCGHTHCVR.3	AFGES[Ph]S[Ph]T[Ph]ES[Ph]DEEEEEGC[cam]GHTHC[cam]VR	81090.1	209194	62312.4	77488.4		103947	93066.2	118262	60609.2	130549	128883	205316
O60934	NBN_HUMAN	IPNYQLSPTK.2	IPNYQLS[Ph]PTK	38960.9	25434.1	47401.5	46001.1	18026.1	10796.4	31439.3	25040.5	57207.8	24299.1	19157.6
O60934	NBN_HUMAN	IPNYQLSPTKLPSINK.3	IPNYQLS[Ph]PTKLPSINK	18330.6	13713.2	11677	10070.1	3453.05	2571.62	17545	10583.6	17725	13521	4918.08
O75069;Q9ULS5	TMCC2_HUMAN;TMCC3_HUMAN	NKFGSADNIAHLK.3	NKFGS[Ph]ADNIAHLK		10330.7		1932.41		7917.59		19293.2			9915.5
O75122	CLAP2_HUMAN	ASLLHSMPTHSSPR.3	ASLLHSMPTHS[Ph]SPR	27600.7	23362.7	22695.5	14523.5	2576.53		29955.6	26611.1	19585.8	22761.6	27348.4
O75122	CLAP2_HUMAN	IPRPSVSQGCSR.2	IPRPSVS[Ph]QGC[cam]S[Ph]R	32360	30072	22327.4	14165.3	24498.6	41556.4	22300.9	19411.3	20596.1	26251.1	32601.6	72183.5
O75122	CLAP2_HUMAN	SQEDMNEPLKR.2	S[Ph]QEDMNEPLKR	5842.51	2601.11	5441.49	8592.07	3197.75	6560.3	4349.6	4265.94	6949.86	11308.4	5473.48	35301.5
O75122	CLAP2_HUMAN	SRSDIDVNAAAGAK.2	SRS[Ph]DIDVNAAAGAK	70394.5	52109.3	56846	73627.2	89210.2	105527	65808.5	69187.3	67990.4	81795.2	93505	108945
O75122	CLAP2_HUMAN	SRSDIDVNAAAGAK.3	S[Ph]RSDIDVNAAAGAK	7872.56	3214.73	10632	11826.8	11643.4	20254.6	13360	12536.7	15570.2	11308.8	8247.55	19293.4
O75122	CLAP2_HUMAN	SRSDIDVNAAAGAK.3	SRS[Ph]DIDVNAAAGAK	3096.99	1437.34	4548.71	5148.68	5664.14	8986.92	5238.97	5360.52	5918.05	5098.32	3698.38	8076.18
O75131	CPNE3_HUMAN	SSPVEFECINEK.2	S[Ph]SPVEFEC[cam]INEK	29576.4	10344.3	5710.25	9256.57	12370.2	6458.12	36631.5	19675.3	13640	9237.92	14543
O75152	ZC11A_HUMAN	KFSAGGDSDPPLKR.3	KFS[Ph]AGGDSDPPLKR	16929.2	4371.2	34096.6	15254.9	14889.6	31544.6	16046.1	3650.41	20187.9	6590.93	10657.7
O75152	ZC11A_HUMAN	KVEAPETNIDKTPK.3	KVEAPETNIDKT[Ph]PK	2838.83	4911.5	18222.2	8058.5	5291.77	9120.36	3352.09	5686.85	12138	4792.13	2015.76
O75152	ZC11A_HUMAN	RLSSASTGKPPLSVEDDFEK.3	RLS[Ph]SAS[Ph]TGKPPLSVEDDFEK	66957.6	74032.9	101083	76459.6	65215.8	212702	61651	57909.3	87113	79291.4	43361	69654
O75152	ZC11A_HUMAN	RLSSASTGKPPLSVEDDFEK.3	RLS[Ph]SASTGKPPLSVEDDFEK	102572	81825	138218	114927	132179	159828	95647.3	66487.9	111948	85565.7	99101.7	88894.9
O75152	ZC11A_HUMAN	RLSSASTGKPPLSVEDDFEK.3	RLSS[Ph]AS[Ph]TGKPPLSVEDDFEK	55673.1	78370.6	89327	66223.4	63048.7	181769	53802	52409.4	77350	70670.3	38670.5	173809
O75152	ZC11A_HUMAN	RLSSASTGKPPLSVEDDFEK.3	RLSSAS[Ph]TGKPPLSVEDDFEK	76386	64957.6	99486.9	83546.8	97614.5	117622	71004.5	51596.9	82215.4	71433.8	72417.6	70510.4
O75175	CNOT3_HUMAN	STDSEVSQSPAK.2	STDSEVSQS[Ph]PAK	3035.97		5219.66	5209.1	5993.93	2680.42		5250.44	3870.26	6789.61	6123.6	3194.85
O75179	ANR17_HUMAN	APSPAPSSVPLGSEKPSNVSQDR.3	APS[Ph]PAPSSVPLGSEKPSNVSQDR	26582.1	33912.7	22196.7	34239.2	38149	19694.2	29077.1	34481.1	26053.8	32943.4	31224.2	19390.2
O75179	ANR17_HUMAN	NSPLDCGSASPNK.2	NSPLDC[cam]GSAS[Ph]PNK	15021.3		21663.7	24911.3	17088.7	14707.8	14476.9	8467.78	18821.7	22184.1	22817.2
O75190	DNJB6_HUMAN	HAPHCLSEEEGEQDRPR.3	HAPHC[cam]LS[Ph]EEEGEQDRPR	177737	62886.4	79371.1	71108.7		41614.8	154547	61541.7	125283	163322	140336	39672.9
O75190	DNJB6_HUMAN	HAPHCLSEEEGEQDRPR.4	HAPHC[cam]LS[Ph]EEEGEQDRPR	103596	18099.6	119229	82169.9		43176.8	159528	45294	135447	110564	73061.3	44829.9
O75362	ZN217_HUMAN	GKQSPPGPGK.2	GKQS[Ph]PPGPGK	14391.3			12023				21628.2		17023.8
O75376	NCOR1_HUMAN	AQLSPGIYDDTSAR.2	AQLS[Ph]PGIYDDTSAR	44345	28798.5	26988.5	32213.5	34748	27997.1	35121.8	30193.7	22475.3	28820.3	34384.9	21237.8
O75376	NCOR1_HUMAN	HTSVVSSGPSVLR.2	HTS[Ph]VVSSGPSVLR	4189.12	2590.71	541.654	18622.3	5763.14		3426.62	4392.01		15518.1	8691.49
O75376	NCOR1_HUMAN	MPIEDSSPEK.2	MPIEDS[Ph]SPEK	3172.46		2596.52	5640.48	3311.45		2593.3	1704.77	3332.81		3012.41
O75376	NCOR1_HUMAN	SHVSSEPYEPISPPQVPVVHEK.3	SHVSSEPYEPIS[Ph]PPQVPVVHEK	123073	53611.7	65010	204445	168149	47660	134007	78058.9	79442.3	125342	160865	32793.2
O75376	NCOR1_HUMAN	SKSPIPGQGYLGTERPSSVSSVHSEGDYHR.5	SKS[Ph]PIPGQGYLGTERPSSVSSVHSEGDYHR	37436	27415.5	9217.54	19335.3	13116.5	16859.6	25142.3	24170.6	13243.4	20314.3	15252	13429.9
O75376	NCOR1_HUMAN	VSPENLVDK.2	VS[Ph]PENLVDK	18378.3	24501.5	17638.2	29833.9	16630.3	10589.6	21042.9	23878.9	14759.4	27417.5	19063.9	15832.4
O75376	NCOR1_HUMAN	YETPSDAIEVISPASSPAPPQEK.3	YETPSDAIEVIS[Ph]PAS[Ph]SPAPPQEK	64754.3	56993.1	39698.4	62624	46730.7	101869	65593.6	61175.5	37527.9	61413	51220.4	145274
O75376	NCOR1_HUMAN	YETPSDAIEVISPASSPAPPQEK.3	YETPSDAIEVIS[Ph]PASS[Ph]PAPPQEK	64954.1	58569.6	38579.4	62895.3	46753.1	101584	65054.7	61246.8	36957.1	61494.5	51428.2	145670
O75396	SC22B_HUMAN	NLGSINTELQDVQR.2	NLGS[Ph]INTELQDVQR	259018	47554.5	124385	116842	83403	61370.1	175379	39840.9	70074.3	79530.3	68770.8	64133.9
O75400	PR40A_HUMAN	HKSDSPESDAEREK.2	HKS[Ph]DS[Ph]PES[Ph]DAEREK	26642.2	68904.9	19392	31284.2	47727.2	39635.8	27437.5	41492	20866	47583	44183.3	42427.7
O75400	PR40A_HUMAN	HKSDSPESDAEREK.3	HKS[Ph]DS[Ph]PES[Ph]DAEREK	21266.3	58871.2	14378.6	29301.3	39291.2	39894.2	21872.8	38091.7	14580.6	31897.5	30747.1	33990.3
O75400	PR40A_HUMAN	HKSDSPESDAEREK.3	HKSDS[Ph]PES[Ph]DAEREK	14784.8	12944.1	19701.4	4704.68	13622.4	17717.9	13297.6	11193.6	19820.3	9035.85	15089	16644.4
O75420	PERQ1_HUMAN	SLSVPDSGR.2	SLS[Ph]VPDSGR	27359.8	16288	27138.8	20005.3	20111.7	34780.7	45501.2	27206.3	23510.6	18503.8	13366.3	37010.3
O75420	PERQ1_HUMAN	SSPSLSDSYSHLSGR.2	S[Ph]SPSLSDSYSHLSGR	52386.3	38998.7	51733.6	26431.9	58820.5	61686.8	48077	35258	54424.2	18386.2	38880.7	66219.3
O75420	PERQ1_HUMAN	SSPSLSDSYSHLSGR.3	S[Ph]SPSLSDSYSHLSGR	17562.3	16735.3	20339.3	6904.91	14811.1	26788	18975.9	15318.5	15763.1	3844.37	11738.8	25410.4
O75420	PERQ1_HUMAN	SSPSLSDSYSHLSGRPIR.3	S[Ph]SPSLSDSYSHLSGRPIR	97659.2	73134.5	68678	30982.1	46844.1	92042.2	107685	75395.5	57205.7	58146.5	55665.9	103744
O75448	MED24_HUMAN	LLSSNEDDANILSSPTDR.2	LLSSNEDDANILSS[Ph]PTDR	28560.4	55138.4	31624.4	36529.1	33978.6	18236.4	34105.2	53118.2	39361.3	45130.9	34925.9
O75475	PSIP1_HUMAN	EDTDHEEKASNEDVTK.3	EDTDHEEKAS[Ph]NEDVTK	4128.65	4103.67			2082.61	6371.64	3537.08	3481.62	1767.73		2752.55	5862.65
O75475	PSIP1_HUMAN	ETSVSKEDTDHEEKASNEDVTK.3	ETSVS[Ph]KEDTDHEEKAS[Ph]NEDVTK	23988.6	30241.9	9340.27	5263.08	12035.6	25898.5	21153	15145.6	7697.94	4668.42	12193	34237.7
O75475	PSIP1_HUMAN	ETSVSKEDTDHEEKASNEDVTK.3	ETSVSKEDT[Ph]DHEEKAS[Ph]NEDVTK	28159	35692.7	11381.8	5939.16		30190.2	24583.3	17485.1	9534.11	5952.5	14366	35752.9
O75475	PSIP1_HUMAN	ETSVSKEDTDHEEKASNEDVTK.3	ETSVSKEDTDHEEKAS[Ph]NEDVTK	13999.9	19209.4	3985.54		9555		11681.7	9182.39	5081.99		7960.73	16256
O75475	PSIP1_HUMAN	ETSVSKEDTDHEEKASNEDVTK.4	ETSVSKEDT[Ph]DHEEKAS[Ph]NEDVTK	12687.1	11654.8	4626.7	4212.2	12455.8	10812.6	12644.1	7718.87	6121.32	3642.22	9685	15001.9
O75475	PSIP1_HUMAN	ETSVSKEDTDHEEKASNEDVTK.4	ETSVSKEDTDHEEKAS[Ph]NEDVTK	8153.49	11512.2			4665.09		6108.89	7654.16	4255.95		6077.02
O75475	PSIP1_HUMAN	QSNASSDVEVEEK.2	QSNAS[Ph]SDVEVEEK	35158.1	36071.3	17158.6	12797.2	19316.1	26737.9	28088.2	25371.7	18100.1	14094.6	22519.7	24341.2
O75475	PSIP1_HUMAN	QSNASSDVEVEEK.2	QSNASS[Ph]DVEVEEK	68020.4	67972.3	34223.7	24298.8	35576.3	45348.1	54102.2	47068.5	35855.8	25952.7	42391.6	44557.6
O75475	PSIP1_HUMAN	TGVTSTSDSEEEGDDQEGEK.3	TGVTST[Ph]S[Ph]DSEEEGDDQEGEK	9850	25106.1	4864.6		24646.2	20666.4	2693.4	10957.2	4680.47			18604.6
O75494	SRS10_HUMAN	SFDYNYR.2	S[Ph]FDYNYR	266259	229941	244358	222880	239482	492232	259180	217821	280585	206890	206586	539554
O75494	SRS10_HUMAN	SHSDNDRFK.2	S[Ph]HS[Ph]DNDRFK	2485.46	2337.37	2236.17	1839.6	2199.87	3586.98	2667.2	2521.45	1793.17	2222.89	1334.67	4844.63
O75494	SRS10_HUMAN	SRSFDYNYR.2	S[Ph]RS[Ph]FDYNYR	952379	731175	811381	530963	1.03185e+06	1.20461e+06	857175	617089	692213	834430	584092	1.86688e+06
O75494	SRS10_HUMAN	SRSFDYNYR.2	SRS[Ph]FDYNYR	6540.49		5148.87	3669.4	11102.5	5000.55	4758.39	4369.29	4626.06	3994.7	8323.25	4673.51
O75494	SRS10_HUMAN	SRSFDYNYR.3	S[Ph]RS[Ph]FDYNYR	6659.4	14484.5	9834.54	7647.98	9784.51	55036.8	8374.82	16533.7	8055.38	9739.95	9637.4	53405
O75494	SRS10_HUMAN	SRSHSDNDRFK.3	S[Ph]RS[Ph]HS[Ph]DNDRFK	1262.77								2937.01	814.853
O75494	SRS10_HUMAN	SRSRSFDYNYR.2	S[Ph]RS[Ph]RS[Ph]FDYNYR	28563.2	33275.3	26048.8	22678.4	26134.4	53209.4	26205.3	21301.3	24740.8	34126.1	18749.6	55947.7
O75494	SRS10_HUMAN	SRSRSFDYNYR.3	S[Ph]RS[Ph]RS[Ph]FDYNYR	35431.8	41318.9	43300.3	35934.8	27317.2	102733	42954.2	46967.9	39539.8	48381.1	27265.4	91030.6
O75494	SRS10_HUMAN	SRSRSYER.2	S[Ph]RS[Ph]RS[Ph]YER	1888.97	1871.64	2044.38	2771.1	2990.74	2510.68	2566.83	2236.73	2486.84	12278.7	1280.1	3339.35
O75494	SRS10_HUMAN	SRSWTSPK.2	SRS[Ph]WT[Ph]SPK	2263.76		2494.8	804.795	2121.46	3160.8	3203.23	4526.6	808.347	618.033	792.215	3631.15
O75494	SRS10_HUMAN	SRSWTSPK.2	SRS[Ph]WTS[Ph]PK	3172.66			937.328	2666.04	3849.43	3777.77	1968.3	1103.43	939.241	2615.06
O75533	SF3B1_HUMAN	GGDSIGETPTPGASK.2	GGDSIGET[Ph]PT[Ph]PGASK	14023.5	46887.8	11534.3	7844.1	19905.9	28656.5	12688	15023.9	10159.7	10453.3	14565.2	41215.7
O75533	SF3B1_HUMAN	GSETPGATPGSK.2	GSET[Ph]PGAT[Ph]PGSK	25078.5	20956.2	17013.2	18846.8	17082.4	19855.7	26955.9	30833.2	16222.5	21572.1	32356.3	12354.2
O75533	SF3B1_HUMAN	KLSSWDQAETPGHTPSLR.3	KLSSWDQAET[Ph]PGHT[Ph]PSLR	66583.5	42845.1	32822.6	31308.3	26305.7	82086.3	77674.4	60285.2	22159.8	51319.1	48678.1	92579.3
O75569	PRKRA_HUMAN	EDSGTFSLGK.2	EDS[Ph]GTFSLGK	30481.1	115725	49134.9	53859.1	45484.5	158866	27876.4	69815.2	45130.9	43910.8	30537.5	110754
O75569	PRKRA_HUMAN	HRAEAPPLEREDSGTFSLGK.4	HRAEAPPLEREDS[Ph]GTFSLGK	6041.82	37957.7				27886.4			3163.04			22637
O75592	MYCB2_HUMAN	AESPGPGSR.2	AES[Ph]PGPGSR	6291.29	4150.69	1199.06	11359	11067.6	4947.71	10185.1	7044.57	3081.35	15387.2	7569.85	4095.03
O75592	MYCB2_HUMAN	GRSTSPKPK.2	GRS[Ph]TS[Ph]PKPK	92.735			33.018				5.88264			127.511
O75592	MYCB2_HUMAN	SKSDSYTLDPDTLR.2	SKS[Ph]DSYTLDPDTLR	113846	47787.4	45357.9	77017	105191	78184.1	70680.7	43716.1	32518.6	72951.6	75803.8	69306.1
O75592	MYCB2_HUMAN	SLSPNHNTLQTLK.2	S[Ph]LS[Ph]PNHNTLQTLK	14454.7	16407.3	7786.83	18529.4	13271.8	46353.8	25399.6	27557	11783.3	31737.6	21385.5	80909.9
O75592	MYCB2_HUMAN	SLSPNHNTLQTLK.2	SLS[Ph]PNHNTLQTLK	25648.3	19698.3	8016.97	26379.5	29321.8	10084.6	23446.7	21158.6	7548.32	22282.6	27157.6	7977.9
O75592	MYCB2_HUMAN	SLSPNHNTLQTLK.3	SLS[Ph]PNHNTLQTLK	4191.03	4868.71	1033.73	4740.2	5866.02	2396.28	3738.77	4072.06	1421.77	3776.18	4946.8
O75592	MYCB2_HUMAN	VNSGDTEVGSSLLR.2	VNS[Ph]GDTEVGSSLLR	36774.7	66154.1	9724.32	89511.4	115814	55554.7	39163	87251.2	9893.38	90892.5	89083.4	48042.9
O75643	U520_HUMAN	EEASDDDMEGDEAVVR.2	EEAS[Ph]DDDM[ox]EGDEAVVR	62487	124018	73955.2	47752.3	240577	107213	38516.4	56908.2	62735.4	65970.4	111245	99803.8
O75643	U520_HUMAN	EEASDDDMEGDEAVVR.2	EEAS[Ph]DDDMEGDEAVVR	795970	753608	606633	636914	1.14243e+06	883203	653750	583160	697023	663782	721706	1.11804e+06
O75643	U520_HUMAN	EEASDDDMEGDEAVVR.3	EEAS[Ph]DDDMEGDEAVVR	27102.8	26004.9	21191.9	17470	23886.4	61065.6	21355.8	23456.7	20692.8	16568.7	29556.9	57300
O75683	SURF6_HUMAN	ELSPAALEK.2	ELS[Ph]PAALEK	11575.8	18622.6	23805.8	30832.1	15931.3	7915.74	9182.82	21767.4	29642.3	35340	20364.6	9394.24
O75691	UTP20_HUMAN	AESDGEEKEEVKEELGR.3	AES[Ph]DGEEKEEVKEELGR	8239.39	10310.8	17094.3	22376.7	33129.8	17524.7	5857.95	9472.84	20511.2	12256.2	31593.1	7728.09
O75694	NU155_HUMAN	AAPQSPSVPK.2	AAPQS[Ph]PSVPK	2281.11	1217.04	2661.19	3295.61	3581.95		2509.54	1982.05	2956.58	3673.69	3745.75
O75717	WDHD1_HUMAN	NQVEEDAEDSGEADDEEKPEIHKPGQNSFSK.4	NQVEEDAEDS[Ph]GEADDEEKPEIHKPGQNSFSK	37584.5	92740.9	78360.4	57652.1	39424.9	50309	42825.6	81748.6	68337.9	84188.4	82571	47036.2
O75822	EIF3J_HUMAN	AAAAAAAGDSDSWDADAFSVEDPVR.3	[ac]AAAAAAAGDS[Ph]DSWDADAFSVEDPVR	168277	241120	254518	298510	255484	253518	117928	270306	229173	243026	242840	253535
O75822	EIF3J_HUMAN	AAAAAAAGDSDSWDADAFSVEDPVRK.3	[ac]AAAAAAAGDS[Ph]DSWDADAFSVEDPVRK	502448	645613	599378	897849	894730	488251	460345	799571	536913	739022	865904	472938
O75822	EIF3J_HUMAN	AAAAAAAGDSDSWDADAFSVEDPVRK.3	[ac]AAAAAAAGDSDS[Ph]WDADAFSVEDPVRK	463337	603884	554469	822122	813700	458864	426188	733695	497717	677328	794567	439610
O75909	CCNK_HUMAN	AVVVSPKEENK.2	AVVVS[Ph]PKEENK	25760.5	22549.5	19169.8	27125.2	34930.6	9339.58	30263.4	36697.6	20836.4	17571.9	46682.9	7917.95
O75909	CCNK_HUMAN	KPSPQPSSPR.2	KPSPQPS[Ph]SPR	9515.14	10157.4	8497.22	8567.15	12074		8494.01	10554.7	10629.1	7674.7	13797.1
O75995	SASH3_HUMAN	SKPSSPVVSEK.2	SKPSS[Ph]PVVSEK	8722.59	14132.4		7235.74	1050.1	2716.01	7867.13	6366.5	1546.28	9636.61
O75995	SASH3_HUMAN	SSSFKDFAK.1	SSS[Ph]FKDFAK	23329.5	63198.2	7321.24	28072.7		12912.6	26223	50018.3	9643.64	31206.4	9962.44	19263.6
O75995	SASH3_HUMAN	SSSFKDFAK.2	S[Ph]SS[Ph]FKDFAK	19026	237856	104701	131893	18644.1	138225	20808.3	187604	51118.5	179232	15556.5	118365
O75995	SASH3_HUMAN	SSSFKDFAK.2	SS[Ph]S[Ph]FKDFAK	21949.1	261667	115013	146105	22157.3	150467	22552	209004	57580.5	200547	18376.7	132970
O75995	SASH3_HUMAN	SSSFKDFAK.2	SSS[Ph]FKDFAK	1.02875e+06	1.54748e+06	406718	1.32894e+06	247071	539884	1.14204e+06	1.9566e+06	411506	1.2162e+06	239830	764949
O76021	RL1D1_HUMAN	AAESETPGKSPEK.2	AAESETPGKS[Ph]PEK	29570.4	26897.1	41581.7	52483.5	38463.9	24834.3	23707.8	23460.2	37452.6	37303.3	22930.5
O76021	RL1D1_HUMAN	ATNESEDEIPQLVPIGK.2	ATNES[Ph]EDEIPQLVPIGK	1.83872e+06	2.07419e+06	1.41211e+06	2.02355e+06	2.78202e+06	1.53454e+06	2.02189e+06	2.3122e+06	1.89331e+06	2.15828e+06	3.05858e+06	1.62611e+06
O76021	RL1D1_HUMAN	ATNESEDEIPQLVPIGK.3	AT[Ph]NESEDEIPQLVPIGK	281149	273310	165486	258970	283208	204798	257130	321647	218137	247124	395332	217628
O76021	RL1D1_HUMAN	ATNESEDEIPQLVPIGK.3	ATNES[Ph]EDEIPQLVPIGK	278806	273261	165180	258979	283752	205095	257136	323359	220947	247219	395092	217670
O76021	RL1D1_HUMAN	EKSPSLGK.2	EKS[Ph]PSLGK	13382.9		16028.7	24118.1	18171.8		12318.5	18326.2	22632.8	27281.6	21520.9
O76021	RL1D1_HUMAN	FFTTPSKSVR.2	FFTT[Ph]PSKS[Ph]VR	1905.44		3578.66	1809.96	2994.56		2501.23	1911.59	3398.58	11309.5	866.885
O76094	SRP72_HUMAN	TVSSPPTSPRPGSAATVSASTSNIIPPR.3	TVS[Ph]S[Ph]PPTSPRPGSAATVSASTSNIIPPR	188662	286090	271224	373845	102341	401671	196775	259659	276416	960744	98470.8	556869
O76094	SRP72_HUMAN	TVSSPPTSPRPGSAATVSASTSNIIPPR.3	TVS[Ph]SPPT[Ph]SPRPGSAATVSASTSNIIPPR	188002	291205	276061	382264	86118	394118	189174	257243	278403	983476	75113.8	554376
O76094	SRP72_HUMAN	TVSSPPTSPRPGSAATVSASTSNIIPPR.3	TVSS[Ph]PPT[Ph]SPRPGSAATVSASTSNIIPPR	168181	267837	249032	338123	88085.8	372378	172399	235301	249901	868490	68776.7	515438
O94763	RMP_HUMAN	KNSTGSGHSAQELPTIR.3	KNS[Ph]TGSGHSAQELPTIR	51420.1	32011.7	86085.6	27432	27959.8	43249.5	49606.9	15602.6	56731.5	7737.1	33488.7	15399.6
O94776	MTA2_HUMAN	GHLSRPEAQSLSPYTTSANR.3	GHLSRPEAQSLS[Ph]PYTTSANR	44879.3	78341.9	57708.2	54910.9	123833	89253.4	41435.7	64590.4	86673	103290	78038.2	75436.4
O94804	STK10_HUMAN	ASQSRPNSSALETLGGEK.2	ASQSRPNS[Ph]SALETLGGEK			46097.3		4726.74		7357.84	9328.41	51769.1	2908.56	5267.52
O94804	STK10_HUMAN	ASQSRPNSSALETLGGEK.3	ASQSRPNSS[Ph]ALETLGGEK			54606.1		8414.27			7110.73	54396.4		6048.57
O94804	STK10_HUMAN	EMGSLSIKDPK.2	EMGS[Ph]LSIKDPK	17583.6	5674.52	26660.8	14116.5	18266.2	4561.86	17990.4	6869.84	30993.5	12510.2	32965.3	4038.35
O94804	STK10_HUMAN	LSEEAECPNPSTPSK.2	LSEEAEC[cam]PNPST[Ph]PSK	6604.12	10616.2	6890.65		21023.8	3264.46	6066.37	8486.22	8749.03	6110.77	23623.3
O94804	STK10_HUMAN	NLKTLQK.2	NLKT[Ph]LQK	1828.3		2286.94	1976.13	2313.03		1924.1	1493.68	3510.32	1571.34	1784.38
O94804	STK10_HUMAN	QVAEQGGDLSPAANR.2	QVAEQGGDLS[Ph]PAANR	15566.8	16101.8	10595.2	9859.3	15074.8		14162.8	5808.26	10072.9	13481.3	29603.2
O94806	KPCD3_HUMAN	RLSNVSLPGPGLSVPR.3	RLS[Ph]NVSLPGPGLSVPR	6286.14	5793.02	3510.02	3509.69	14857.5	1657.69	4215.8	3325.9	3809.86	4510.31	6080.3	1928
O94819	KBTBB_HUMAN	ACPEEPAAPSPEPR.2	AC[cam]PEEPAAPS[Ph]PEPR					127939			25706.5			133881
O94826	TOM70_HUMAN	ASPAPGSGHPEGPGAHLDMNSLDR.3	AS[Ph]PAPGSGHPEGPGAHLDM[ox]NSLDR	44441.6	25936	20745.3	24036.6	60120.2	15780.2	39041.6	36294.5	16832.9	32738.3	46426.3	8141.8
O94826	TOM70_HUMAN	ASPAPGSGHPEGPGAHLDMNSLDR.3	AS[Ph]PAPGSGHPEGPGAHLDMNSLDR	409666	303177	171320	251207	407213	174366	340717	326392	165899	229043	386870	130031
O94826	TOM70_HUMAN	ASPAPGSGHPEGPGAHLDMNSLDR.4	AS[Ph]PAPGSGHPEGPGAHLDMNSLDR	204871	168224	90301.4	130860	81539.1	94668.7	211115	238204	84356.2	109792	217009	66747.1
O94842	TOX4_HUMAN	LSTTPSPTSSLHEDGVEDFRR.3	LSTTPS[Ph]PTSS[Ph]LHEDGVEDFRR	32160.7	51203.1	22033.8	27974.5	41422.7	52933	24742.8	37780.9	11648.7	22001.3	34545	45625.2
O94874	UFL1_HUMAN	KDDDSDDESQSSHTGK.3	KDDDS[Ph]DDESQSSHTGK	5615.67	3073.67	5221.52	2591.87	9857.2		5452.29	7034.73	5052.11	10696.4	1673.71
O94875	SRBS2_HUMAN	RKSEPAVGPPR.3	RKS[Ph]EPAVGPPR	13351.3			3056.08			25104
O94880	PHF14_HUMAN	SFVPEEEKHEER.3	S[Ph]FVPEEEKHEER	10390.1		42561.2	10709.1	8812.58	57136.5	10069.3	4589.85	24616.9	7849.31	4010.49	24820.6
O94888	UBXN7_HUMAN	SESLIDASEDSQLEAAIR.2	SES[Ph]LIDASEDS[Ph]QLEAAIR	120283	187309	67927.4	123923	234162	217642	117173	167153	56667.1	120032	181379	212565
O94888	UBXN7_HUMAN	SESLIDASEDSQLEAAIR.2	SESLIDAS[Ph]EDSQLEAAIR	126824	136534	65227	97860.8	173672	169660	149234	124918	50150.4	97103.8	135377	163053
O94888	UBXN7_HUMAN	SESLIDASEDSQLEAAIR.2	SESLIDASEDS[Ph]QLEAAIR	191137	215321	89091.3	144542	275311	240035	218568	194667	72895.2	136227	209280	233878
O94913	PCF11_HUMAN	EEQRSPFNDRFPLK.3	EEQRS[Ph]PFNDRFPLK	11138.8	8100.6	9163.72	17211	12610.3	9081.17	10126	10684.2	12358.6	12087.1	15204.1	6258.9
O94913	PCF11_HUMAN	NELQEPCDSPK.2	NELQEPC[cam]DS[Ph]PK	6996.27	5915.94	6152.35		8025.75	10368.3			6099.42	1052.16	3442.7	9969.18
O94913	PCF11_HUMAN	SKSPSPLK.2	SKS[Ph]PS[Ph]PLK	6652.03	11874.9	7310.43	10122.4	9483.26	16311.9	4980.5	12197.5	5589.06	7496.94	6701.21	14331.1
O94913	PCF11_HUMAN	SMSPTSTPK.2	S[Ph]MS[Ph]PTSTPK	4119.85	7213.85	4524.52	6344.65	5089.65	7531.75	3815.5	5276.27	2682.7	5582.95	5153.76	11158.3
O94913	PCF11_HUMAN	SPIIHSPK.2	SPIIHS[Ph]PK	2614.56	1662.7	7466.3	5473.37	3290.38	4003.75	3151.12	4947.46	5563.69	3108.68	3717.43	5278.42
O94913	PCF11_HUMAN	SRSPIIHSPK.2	SRS[Ph]PIIHS[Ph]PK	46479	75717.7	47258.6	57179.6	37717.4	115135	55795.8	68617.7	47038.6	69830.7	45005.4	135591
O94913	PCF11_HUMAN	SRSPIIHSPK.3	SRS[Ph]PIIHS[Ph]PK	6352.73	6429.4	12520.4	15251	6925.24	33335.1	12165.7	12975	12603.3	13243.4	3551.81	42896.9
O94915	FRYL_HUMAN	SNTLDIMDGR.2	S[Ph]NTLDIMDGR	46363.1	20613.3	39233.3	21919.9	49952.8	22145.9	41451.4	19422.9	26412.8	15723.1	53130.1	19111.1
O94915	FRYL_HUMAN	TRSLSSLR.2	TRS[Ph]LSSLR	1384.02		1459.29	2814	2863.45	1244.62	1954.23	1731.35	1849.43	2895.53	3526.6
O94921	CDK14_HUMAN	ADSYEKLEK.2	ADS[Ph]YEKLEK	2823.45	461.047	2891.76				3266.67	1694.82	2866.54
O94979	SC31A_HUMAN	AQGEPVAGHESPKIPYEK.3	AQGEPVAGHES[Ph]PKIPYEK	115502	180668	107506	260987	304387	86282.2	85908.1	174416	154228	187450	314493	104114
O94979	SC31A_HUMAN	AQGEPVAGHESPKIPYEK.4	AQGEPVAGHES[Ph]PKIPYEK	4363.73	9654.31	4643.59	10469.7	7634.12	5598.81	3202.26	11847.1	6219.17	8171.78	14126.9	4252.77
O94979	SC31A_HUMAN	DSDQVAQSDGEESPAAEEQLLGEHIK.3	DSDQVAQS[Ph]DGEESPAAEEQLLGEHIK	29511.8	109506	30118.9	43467.8	82867.4	26932.1	28342.8	94543.5	34053.2	33962.9	79643	46162
O94979	SC31A_HUMAN	EQTLSPTITSGLHNIAR.3	EQT[Ph]LSPTITSGLHNIAR	7783.7	16101.8	6052.74	18607.1	25683.7		6813.09	17497	8017.61	13203	24771.5
O95071	UBR5_HUMAN	RISQSQPVR.2	RIS[Ph]QSQPVR	19075.4	9642.55	15042.5	19503.4	9478.07	19528.2	12857.5	6613.35	13391.4	11677	9413.96	10979.5
O95218	ZRAB2_HUMAN	EESDGEYDEFGR.2	EES[Ph]DGEYDEFGR	164324	76371.2	123630	122817	212922	109305	136243	68279.2	135742	121568	97916.8	186806
O95218	ZRAB2_HUMAN	ENVEYIEREESDGEYDEFGR.3	ENVEYIEREES[Ph]DGEYDEFGR	989840	478140	713269	846598	1.31211e+06	533652	1.15251e+06	660939	665809	981255	701024	620757
O95218	ZRAB2_HUMAN	ENVEYIEREESDGEYDEFGRK.3	ENVEYIEREES[Ph]DGEYDEFGRK	63650.8	31297.1	41151.7	49261.9	65282.2	27374.8	66537.4	35481.6	38226.3	66169.1	61561.4	27153.1
O95218	ZRAB2_HUMAN	EVEDKESEGEEEDEDEDLSK.2	EVEDKES[Ph]EGEEEDEDEDLSK	124339	167050	84426.7	90533.8	158322	79956.7	109301	73911.4	72951.7	118426	114625	100164
O95218	ZRAB2_HUMAN	EVEDKESEGEEEDEDEDLSK.3	EVEDKES[Ph]EGEEEDEDEDLSK	391425	414849	264852	247866	643045	220414	328795	204065	200626	316689	385747	273285
O95218	ZRAB2_HUMAN	SRSPERR.2	S[Ph]RS[Ph]PERR			152.252						1108.62
O95218	ZRAB2_HUMAN	YNLDASEEEDSNK.2	YNLDAS[Ph]EEEDSNK	235925	178022	195619	180959	167249	175845	174525	148630	201681	183176	91155.8	173542
O95218	ZRAB2_HUMAN	YNLDASEEEDSNKK.2	YNLDAS[Ph]EEEDSNKK	24836	19117.4	17972.3	15351.4	14855	19348.7	19796.8	12928.8	19820.9	21029.7	15350.3	16335.7
O95218	ZRAB2_HUMAN	YNLDASEEEDSNKKK.2	YNLDAS[Ph]EEEDSNKKK	17521.3	20327.4	8211.14	15437.5	12972.8	5981.28	21724.3	12981	10077.3	25932.6	9449.65
O95218	ZRAB2_HUMAN	YNLDASEEEDSNKKK.3	YNLDAS[Ph]EEEDSNKKK	57900.7	24177.8	29838	33930	20396.4		66912.9	28430.5	32998.1	49220.1	17375.3	23318.2
O95239	KIF4A_HUMAN	TFSLTEVR.2	TFS[Ph]LTEVR	2915.76	3490.05	4380.77	7232.97	716.448	7394.33	1271.8	478.467	1619.61	2182.89	1974.33
O95251	KAT7_HUMAN	LSQSSQDSSPVR.2	LSQSSQDS[Ph]SPVR	14191.7	21879.2	11448.8	10834	33713.7	12495.3	13527	25699.5	10868.4	8749.9	26399.3	17310
O95251	KAT7_HUMAN	LSQSSQDSSPVR.2	LSQSSQDSS[Ph]PVR	20267	29711.6	15211.4	16519.4	51688.6	17775.4	20410	33998.4	17405.3	12424.1	37627.4	23310.4
O95251	KAT7_HUMAN	SSGSETEQVVDFSDR.2	SSGS[Ph]ETEQVVDFSDR	16567.5	28552.1	13881.8	15101.2	21238.2	45166.5	15332.4	31337.5	13961.9	13419.8	18148	27559.2
O95295	SNAPN_HUMAN	AMLDSGIYPPGSPGK.2	AMLDSGIYPPGS[Ph]PGK	77901.5	44602.4	59033.9	122470	70879.7	26184.6	56726.4	59279.2	51846.7	68781.7	113270
O95365	ZBT7A_HUMAN	HFKDEDEDEDVASPDGLGR.3	HFKDEDEDEDVAS[Ph]PDGLGR	27961.6	32977	66026.3	45157.9	25260.6	25488.1	23669.3	31536.3	75002	55200.5	22454	40180.8
O95379	TFIP8_HUMAN	MHSEAEESKEVATDVFNSK.3	[ac]MHS[Ph]EAEESKEVATDVFNSK	5591.33	10354.9		8974.72	9775.81		7786.41	20365.1		19150.4	23416.4
O95391	SLU7_HUMAN	DHNSEDEDEDKYADDIDMPGQNFDSK.3	DHNS[Ph]EDEDEDKYADDIDMPGQNFDSK	31437.1	55187.5	73948.2	26147.3	82536	60124.3	35571.5	43808.5	61045.4	23867.2	52733.8	78342.5
O95391	SLU7_HUMAN	LVEQANSPK.2	LVEQANS[Ph]PK	12737.3	8099.99	12614.5			6795.23	11126.6	16688.2	13524.9
O95400	CD2B2_HUMAN	HSLDSDEEEDDDDGGSSK.2	HSLDS[Ph]DEEEDDDDGGSSK	123901	294197	135120	103468	84085.4	96884.7	121791	158818	108737	97177.1	92574.9	103318
O95400	CD2B2_HUMAN	HSLDSDEEEDDDDGGSSK.3	HSLDS[Ph]DEEEDDDDGGSSK	47153.4	85157.8	39979.2	29774.7	45777.2	38071.7	41211.1	42946.4	35618	24188.6	32239.4	61860.8
O95400	CD2B2_HUMAN	KGPGQPSSPQR.2	KGPGQPS[Ph]SPQR	74370.6	71863.7	97663.4	78706.4	68389.3	46056.5	74612.7	83586.8	101707	81072	78091.6	38748.5
O95400	CD2B2_HUMAN	KGPGQPSSPQR.2	KGPGQPSS[Ph]PQR	82977.4	78780.7	105704	100376	76343.4	51340	83024.6	91747.4	110685	89076.7	85134.8	54562.4
O95400	CD2B2_HUMAN	KGPGQPSSPQR.3	KGPGQPS[Ph]SPQR			984.97						2275.81	971.789
O95400	CD2B2_HUMAN	KGPGQPSSPQRLDR.3	KGPGQPS[Ph]SPQRLDR	12398.2	8510.02	13286.7	16887.5		8429.74	20762.4	15721.1	14365.3	22597.7	6968.45	6342.19
O95400	CD2B2_HUMAN	KGPGQPSSPQRLDR.3	KGPGQPSS[Ph]PQRLDR	6782.91	4008.05	6760.53	10750.3		3518.68	11054.1	8224.55	6962.32	13445.4	4279.37	3583.93
O95402	MED26_HUMAN	ADSPVHMEQQSR.2	ADS[Ph]PVHMEQQSR	7735.98	9493.47	7681.14	6853.24	6652.79		6120.21	7075.26	7116.96	6202.62	9533.65
O95429	BAG4_HUMAN	SSGNSPTPVSR.2	SSGNS[Ph]PTPVSR	6601.66	8032.72	4642.45	4800.34	4703.24		6016.33	5999.09	5472.21	6187.18	6086.91
O95433	AHSA1_HUMAN	KAKPAPSK.2	KAKPAPS[Ph]K	126377	138857	45148.3	82864.3		91602.8	263773	288338	57104.9		8162.02	40439.3
O95453	PARN_HUMAN	ELSPAGSISK.2	ELS[Ph]PAGSISK	58876.7	23621.3	56293.6	41433.3	67887.9	18573.7	68383.3	38727.5	83073.2	43000.9	66812.7	16184.5
O95453	PARN_HUMAN	KELSPAGSISK.2	KELS[Ph]PAGSISK	4508.69		3762.24	2829.89	4295.2		2804.38	1660.38	5385.68	2013.47	2935.97
O95453	PARN_HUMAN	NNSFTAPSTVGK.2	NNS[Ph]FTAPSTVGK	60179.6	27126.2	37444.4	35262.4	36190.4	58502.8	69240.1	16451.4	30240.7	49837	29874.2	33858.2
O95466	FMNL_HUMAN	EAAAQEAGADTPGKGEPPAPKSPPK.3	EAAAQEAGADTPGKGEPPAPKS[Ph]PPK		151435	50720.1	34541.3	108573	72670.2		131762	59864.1	55351.8	97381.6	65215.8
O95466	FMNL_HUMAN	EAAAQEAGADTPGKGEPPAPKSPPK.4	EAAAQEAGADTPGKGEPPAPKS[Ph]PPK	2886.32	17992.1	15085.4	12910.5	11554.7	30719.3	2350	32287	16316.1	9500.56	14785.9	32519.9
O95466	FMNL_HUMAN	NKPLEQSVEDLSK.2	NKPLEQS[Ph]VEDLSK	4677.79	47685.7	19560.9	28563.9	37071.8	34908.8	5082.01	53697.8	41218.3	38333.2	34330.9	30147.8
O95466	FMNL_HUMAN	RDSELGPGVK.2	RDS[Ph]ELGPGVK	7190.47	60157.4	57506.7	25827.8	69305.6	84545.4	6174.44	59962.6	49882	18538.6	46103.6	78874.8
O95544	NADK_HUMAN	SLSASPALGSTK.2	SLS[Ph]ASPALGSTK	15393	28267.3	9228.57	4095.88	13548	16979.9	19113.8	39074.4	11812.6	3560.69	19347.5	20342.6
O95644	NFAC1_HUMAN	GLGACTLLGSPR.2	GLGAC[cam]TLLGS[Ph]PR	66724.8		5055.88	13758.5	23585.8	21798.7	61422.5		10719.9	8575.04	23817.1	7971.82
O95671	ASML_HUMAN	HDSIPAADTFEDLSDVEGGGSEPTQR.3	HDSIPAADTFEDLS[Ph]DVEGGGSEPTQR	529163	706398	327375	563335	3.47647e+06	418647	702531	872053	411394	554126	2.91422e+06	425456
O95671	ASML_HUMAN	VVLASASPR.2	VVLASAS[Ph]PR	1574.73		1170.2	3647.97	13616.3		1141.38	587.37	1248.73	3371.34	14134.6
O95674	CDS2_HUMAN	VDGETASDSESR.2	VDGETAS[Ph]DSESR	8284.21	14934.5	2221.48	5033.21	26513.9		9261.41	11289.8	1472.36	3770.68	32632.9
O95684	FR1OP_HUMAN	EKGPTTGEGALDLSDVHSPPKSPEGK.4	EKGPTTGEGALDLS[Ph]DVHSPPKS[Ph]PEGK	58559.3	104605	84717.8	44745.6	18529.5	139939	32652.9	86943.1	61158.5	57739.9	24357.2	197460
O95684	FR1OP_HUMAN	EKGPTTGEGALDLSDVHSPPKSPEGK.4	EKGPTTGEGALDLSDVHS[Ph]PPKS[Ph]PEGK	66905.6	107584	97776.1	51956.9	22332.8	154718	44450.6	104510	72783.8	44767.3	31993.1	199453
O95684	FR1OP_HUMAN	GPTTGEGALDLSDVHSPPKSPEGK.3	GPTTGEGALDLSDVHS[Ph]PPKS[Ph]PEGK	34362.3	83029.3	80977.2	56327.1	26614.6	95205.1	43660.6	56279.9	56380	56427.8	28364.4	107632
O95696	BRD1_HUMAN	VHGEPTSDLSDID.2	VHGEPTS[Ph]DLS[Ph]DID	25136	54352.1	19122	5598.48	26401	124147	28530.1	53658.3	24722.5	4278.04	25325.9	172783
O95785	WIZ_HUMAN	SPQLSLSPRPASPK.2	SPQLSLS[Ph]PRPAS[Ph]PK	8765.86		9869.95	11800.9	6225.59	18331	12002.3	14435.9	11135.7	16366.9	8148.83
O95785	WIZ_HUMAN	SPSDLHISPLAK.2	S[Ph]PSDLHIS[Ph]PLAK	4197.15		3524.33	4435.15	1325.63		5242.16	2394.92	4798.37	15480.8	2342.18	4053.69
O95819	M4K4_HUMAN	KGSVVNVNPTNTRPQSDTPEIR.3	KGS[Ph]VVNVNPTNTRPQSDTPEIR	166339		87489	59850.6	108924	26394.4	111104		74673.7	29333.7	118330
O95819	M4K4_HUMAN	KGSVVNVNPTNTRPQSDTPEIR.4	KGS[Ph]VVNVNPTNTRPQSDTPEIR	34651		19710	11864.7	12237.3		23019		13634.8	2712	28633.6
O95819	M4K4_HUMAN	TTSRSPVLSR.2	TTS[Ph]RS[Ph]PVLSR	45841.8	4384.32	29839.9	30778.5	18308.6	22919.1	36190.1	7387.14	25367.5	45219.1	22260.4	28280.3
O95831	AIFM1_HUMAN	SLSAIDR.2	SLS[Ph]AIDR	2286.11	2352.29	8319.62	7360.16	3402.09		3287.55	1930.55	10454.7	7663.32	1691.62	2207.29
O95983	MBD3_HUMAN	VRYDSSNQVK.2	VRYDS[Ph]SNQVK	60086.7	83309						116713
O95997;Q9NZH5	PTTG1_HUMAN;PTTG2_HUMAN	LFQLGPPSPVK.2	LFQLGPPS[Ph]PVK	60555.2	33926.8	117186	70874.3	61399.3	37818.4	47032.1	32988.6	110228	46968.5	56000.2	21407.3
O95999	BCL10_HUMAN	SNSDESNFSEK.2	SNS[Ph]DESNFSEK	4568.22	16608.6	5553.77	6380.96	15280.5	8802.56	5048.23			7010.72	3458.26	19216
O96013	PAK4_HUMAN	SPQREPQR.2	S[Ph]PQREPQR	5813.62	14262	6851.24	7843.87	6165.23	8235.46	7894.09	11116.3	3343.95	7948.69	9451.07
O96019	ACL6A_HUMAN	EGSPANWK.2	EGS[Ph]PANWK	9565.81	1556.48	8610.54	11924.6	8477.27	9889.86	10556.3	7404.95	6803.21	9387.85	4925.23
P01106	MYC_HUMAN	SESGSPSAGGHSKPPHSPLVLK.4	SESGSPSAGGHSKPPHS[Ph]PLVLK	1092.52	6526.2	6047.04	1204.03		7351.1	565.946	2281.67	2889.36		312.005
P01833	PIGR_HUMAN	RSSKEEAEMAYK.2	RSS[Ph]KEEAEMAYK		28194.6			10590.4			18869.4			6832.31
P01833	PIGR_HUMAN	RSSKEEAEMAYK.3	RSS[Ph]KEEAEMAYK		21637.5		646.033	7895.5			24308.7		357.527	4982.88
P01892;P30447;P05534;P01891;P10316;Q09160	1A02_HUMAN;1A23_HUMAN;1A24_HUMAN;1A68_HUMAN;1A69_HUMAN;1A80_HUMAN	KGGSYSQAASSDSAQGSDVSLTACK.3	KGGSYSQAASSDSAQGS[Ph]DVS[Ph]LTAC[cam]K		23305.2				17405.1		10217				35424.5
P02765;P12763	FETUA_HUMAN;	CDSSPDSAEDVR.2	C[cam]DSSPDS[Ph]AEDVR	10190.3	21971.3	11674.5	15363.8	23909.9	8085.5	7581.54	13858.2	11906.5	14525.2	20026	30088
P02765;P12763	FETUA_HUMAN;	CDSSPDSAEDVRK.2	C[cam]DSSPDS[Ph]AEDVRK	250960	462224	279535	353752	437812		223364	285377	289001	76406.2	472925	89661.9
P02765;P12763	FETUA_HUMAN;	CDSSPDSAEDVRK.3	C[cam]DSSPDS[Ph]AEDVRK	9728.27	49873.5	47144.5	15240	22695.7	39062.5	32297.5	41914.8	16910.7	13027.9	19569.6
P02794	FRIH_HUMAN	HTLGDSDNES.2	HTLGDS[Ph]DNES	7473.67	5982.71	4278.24	2415.18	4281.59		4396.24	3982.27	3252.91	1200.05
P04035	HMDH_HUMAN	SKINLQDLQGACTK.2	S[Ph]KINLQDLQGAC[cam]TK	13379.7	7161.83	8642.77	10283	14051.7		8184.91	2079.65	4690.44	10334.5	11973
P04035	HMDH_HUMAN	SKINLQDLQGACTK.3	S[Ph]KINLQDLQGAC[cam]TK	8042.08	4049.56	4098.32	6205.59	3009.4		5007.26	1348	2040.92	5799.03	7265.09
P04040	CATA_HUMAN	NAIHTFVQSGSHLAAR.3	NAIHTFVQS[Ph]GSHLAAR				1742.77	18668.7			5524.98			30867.1
P04049	RAF1_HUMAN	STSTPNVHMVSTTLPVDSR.3	S[Ph]TSTPNVHMVSTTLPVDSR	59635	53791.6	81623.9	66575.2	53936.1	31889.7	63683.4	58449.6	81625.6	55408.5	70863.4	31976.5
P04049	RAF1_HUMAN	STSTPNVHMVSTTLPVDSR.3	STS[Ph]TPNVHMVSTTLPVDSR	63137.8	56002.5	85861.6	70914.3	57063.7	32873.2	67833.4	58912.8	86563.2	58829.1	76667.6	17632.3
P04075	ALDOA_HUMAN	GILAADESTGSIAK.2	GILAADESTGS[Ph]IAK	9656.21			8212.59	4900.19		11095.8	9758.88	3395.93	7584.68	7367.88
P04183	KITH_HUMAN	SCINLPTVLPGSPSK.2	[ac]SC[cam]INLPTVLPGS[Ph]PSK	937965	959142	952855	648350	600087	770750	1.15171e+06	908822	1.0865e+06	794365	683473	587943
P04183	KITH_HUMAN	SCINLPTVLPGSPSK.2	SC[cam]INLPTVLPGS[Ph]PSK	17747.3	11022.6	14528.4	9303.41	5294.55	10939.6	17249.8	9011.71	13093.4	11643.5	3906.3	6545.07
P04637	P53_HUMAN	ALPNNTSSSPQPK.2	ALPNNTS[Ph]SSPQPK	12848.3		5573.62	27623.8			10434.8	480.844	7394.8	31879.4	1022.46
P04637	P53_HUMAN	ALPNNTSSSPQPK.2	ALPNNTSS[Ph]SPQPK	26805.2		19115.5	51380.6			26518.1		21066	59467.5
P04637	P53_HUMAN	ALPNNTSSSPQPK.2	ALPNNTSSS[Ph]PQPK	12266.7		5766.9	20418.3	214.99		9552.32	509.243	7850.92	23637.5
P04792	HSPB1_HUMAN	GPSWDPFR.2	GPS[Ph]WDPFR	50.3749	1205.63	2554.55	5210.49	1860.84	123579		1043.68	3638.33	2958.96	1847.6	90810.5
P04792	HSPB1_HUMAN	QLSSGVSEIR.2	QLS[Ph]SGVSEIR			680.284	2204.12	4436.27	158470		13601.3	16901.3	1866.64	5136.88	108190
P05114	HMGN1_HUMAN	KVSSAEGAAK.2	KVS[Ph]SAEGAAK	4924.2		7179.86		1108.8		3829.68	1969.86	6936.96	1176.12	906.207
P05114	HMGN1_HUMAN	KVSSAEGAAKEEPK.2	KVS[Ph]SAEGAAKEEPK	7020.48		10847				7233.08	4083.28	10728.5		1457.51
P05114	HMGN1_HUMAN	KVSSAEGAAKEEPK.3	KVS[Ph]SAEGAAKEEPK	4335.81		8971.49				3832.44	877.997	6095.36	1295.41
P05114	HMGN1_HUMAN	KVSSAEGAAKEEPK.3	KVSS[Ph]AEGAAKEEPK	5643.77		8896.25				4543	1179.77	6306.22
P05114	HMGN1_HUMAN	TEESPASDEAGEK.2	TEES[Ph]PAS[Ph]DEAGEK	14672.1	18755.4	12826.7		7994.09	9702.73	13738.3	9882.26	9786.62			13638
P05114	HMGN1_HUMAN	TEESPASDEAGEK.2	TEESPAS[Ph]DEAGEK	26488.8	15840.1	22836	11312.7	17306.1	7652.72	22223.8	15788.2	27479	6762.25	13039.4
P05114	HMGN1_HUMAN	TEESPASDEAGEKEAKSD.2	TEESPASDEAGEKEAKS[Ph]D	5939.88	14438	5554.19	4092.83	2096.64		6172.45	3640.34	7125	7335.88	3423.53
P05114	HMGN1_HUMAN	TEESPASDEAGEKEAKSD.3	TEESPASDEAGEKEAKS[Ph]D	6402.75	7674.41	5903.88	4318.94	4835.86		6552.4	4439.47	6173.95	5145.11	3342.68
P05455	LA_HUMAN	FASDDEHDEHDENGATGPVK.2	FAS[Ph]DDEHDEHDENGATGPVK	65881.9	104124	83302.3	85324.7	335039	41543.4	81726.5	50620.4	96788.3	78456.9	242982	55936.1
P05455	LA_HUMAN	FASDDEHDEHDENGATGPVK.3	FAS[Ph]DDEHDEHDENGATGPVK	562581	571495	558532	406027	1.55894e+06	203691	389678	295663	659301	298866	1.28318e+06	285742
P05455	LA_HUMAN	FASDDEHDEHDENGATGPVKR.3	FAS[Ph]DDEHDEHDENGATGPVKR	219545	163627	190260	211070	480387	101619	169988	149045	235823	258832	520897	87823.5
P05455	LA_HUMAN	FASDDEHDEHDENGATGPVKR.4	FAS[Ph]DDEHDEHDENGATGPVKR	348163	223184	440042	293767	332187	215390	373568	280673	537529	356301	754695	188461
P05455	LA_HUMAN	SPSKPLPEVTDEYKNDVK.3	S[Ph]PSKPLPEVTDEYKNDVK	44717.1	26474.5	148955	115686	51795.9	67623.5	43741.2	39971	121890	147603	74788.3	68672.9
P05455	LA_HUMAN	SPSKPLPEVTDEYKNDVK.3	SPS[Ph]KPLPEVTDEYKNDVK	46671.7	26534.8	154466	119970	51653.4	68898.5	44970.7	42291.3	124482	152112	77969.2	69997.7
P05455	LA_HUMAN	TKFASDDEHDEHDENGATGPVK.3	TKFAS[Ph]DDEHDEHDENGATGPVK	73816.8	47899.1	59524.8	45314.6	126957	36271.5	51204.7	48961.3	66453.1	50873.6	143120	28079.1
P05455	LA_HUMAN	TKFASDDEHDEHDENGATGPVKR.3	TKFAS[Ph]DDEHDEHDENGATGPVKR	22951		11991.2	16190.2	32396.6		20910.1	16685.8	20560.8	26803.7	47281
P06400	RB_HUMAN	FPSSPLR.2	FPSS[Ph]PLR		8525.26	8473	9089.47	15884.6	8818.95		17040.3	7219.54	3276.35	4428.1
P06400	RB_HUMAN	IPGGNIYISPLK.2	IPGGNIYIS[Ph]PLK		32763.7	8611.54	54626.2	48774.5	36012		50759.1	29693.7	28477.7	43198.3	11281.5
P06400	RB_HUMAN	IPGGNIYISPLKSPYK.2	IPGGNIYIS[Ph]PLKS[Ph]PYK		943561	1.01572e+06	1.18148e+06	575007	1.78043e+06		847772	836665	1.45367e+06	590786	1.53776e+06
P06400	RB_HUMAN	IPGGNIYISPLKSPYK.3	IPGGNIYIS[Ph]PLKS[Ph]PYK		852241	821374	859806	485786	1.65523e+06		799054	601263	988207	477477	1.3216e+06
P06400	RB_HUMAN	ISEGLPTPTKMTPR.2	ISEGLPT[Ph]PTKM[ox]T[Ph]PR	19605.2	31824.2	36028.5	56191.6	30241.5	36515.3	10408.4	36204.3	36291.6	63956.4	36393.1	87695.8
P06400	RB_HUMAN	ISEGLPTPTKMTPR.2	ISEGLPT[Ph]PTKMT[Ph]PR	6232.76	318119	409280	469302	212529	414306	19101.8	320895	398562	611412	224581	316551
P06400	RB_HUMAN	ISEGLPTPTKMTPR.3	ISEGLPT[Ph]PT[Ph]KM[ox]TPR		6488.55	8831.9	10071.8	10854.5	22038.7		5522.42	4084.73	8237.79	3522.02	12413.1
P06400	RB_HUMAN	ISEGLPTPTKMTPR.3	ISEGLPT[Ph]PTKM[ox]T[Ph]PR	1606.46	4571.93	5566.74	6581.08	7703.61	14218.4		3929.86	3976.57	7022.04	2365.46	6740.1
P06400	RB_HUMAN	ISEGLPTPTKMTPR.3	ISEGLPT[Ph]PTKMT[Ph]PR		106258	112424	117820	55491.5	147925		112204	107288	140789	76269	101903
P06400	RB_HUMAN	KSNLDEEVNVIPPHTPVR.3	KSNLDEEVNVIPPHT[Ph]PVR		423816	272806	544297	612966	420822		478250	266238	435938	509243	261562
P06400	RB_HUMAN	KTAATAAAAAAEPPAPPPPPPPEEDPEQDSGPEDLPLVR.4	KTAATAAAAAAEPPAPPPPPPPEEDPEQDS[Ph]GPEDLPLVR		909765	541173	990730	1.19037e+06	578518		1.02388e+06	555734	1.13534e+06	1.14508e+06	532319
P06400	RB_HUMAN	KTAATAAAAAAEPPAPPPPPPPEEDPEQDSGPEDLPLVR.5	KTAATAAAAAAEPPAPPPPPPPEEDPEQDS[Ph]GPEDLPLVR	1182.89	1.03489e+06	574977	1.07258e+06	1.02536e+06	615148		1.1077e+06	586961	1.315e+06	1.25306e+06	597815
P06400	RB_HUMAN	KTAATAAAAAAEPPAPPPPPPPEEDPEQDSGPEDLPLVR.6	KTAATAAAAAAEPPAPPPPPPPEEDPEQDS[Ph]GPEDLPLVR		331883	171537	327270	264145	197454		357894	190129	372045	365209	197436
P06400	RB_HUMAN	SPYKFPSSPLR.2	S[Ph]PYKFPS[Ph]SPLR	2305.52	1.70122e+06	1.19423e+06	1.59834e+06	788246	3.12534e+06	3444.51	1.425e+06	1.09159e+06	1.73817e+06	848092	3.46978e+06
P06400	RB_HUMAN	SPYKFPSSPLR.2	S[Ph]PYKFPSS[Ph]PLR	2012.85	1.57139e+06	1.10674e+06	1.47947e+06	728152	2.88909e+06	2716.06	1.32056e+06	1.00897e+06	1.60673e+06	783639	3.19615e+06
P06400	RB_HUMAN	SPYKFPSSPLR.2	S[Ph]PYKFPSSPLR		166658	80713.4	157142	78427.1	147033	621.932	134446	84980.5	171512	81979.4	149317
P06400	RB_HUMAN	SPYKFPSSPLR.2	SPYKFPSS[Ph]PLR	493.399	11429.5	6531.58	9816.73	6965.01	14073.2		17805.2	4796.85	17677.6	17119.5	8209.74
P06400	RB_HUMAN	SPYKFPSSPLR.3	S[Ph]PYKFPSS[Ph]PLR		84384.9	39338	47178.4	26583.3	109648		64296.3	37123.8	41232.7	27210.9	119983
P06400	RB_HUMAN	SPYKFPSSPLR.3	S[Ph]PYKFPSSPLR		25660.7	8093.52	17315	6749.54	19778.4		20214	9655.46	18454	7186.84	17058.7
P06400	RB_HUMAN	TAATAAAAAAEPPAPPPPPPPEEDPEQDSGPEDLPLVR.4	TAATAAAAAAEPPAPPPPPPPEEDPEQDS[Ph]GPEDLPLVR		1.13896e+06	421362	1.12398e+06	1.82773e+06	923600		962234	571451	947144	1.78853e+06	885030
P06400	RB_HUMAN	TAATAAAAAAEPPAPPPPPPPEEDPEQDSGPEDLPLVR.5	TAATAAAAAAEPPAPPPPPPPEEDPEQDS[Ph]GPEDLPLVR		628488	215164	535078	696230	490268		534912	302649	424301	809029	468684
P06400	RB_HUMAN	TAVIPINGSPR.2	TAVIPINGS[Ph]PR	310.232	64781	40699	118010	72348.9	99209.9		85852.7	49356.2	112398	77289.2	70482.6
P06400	RB_HUMAN	TAVIPINGSPRTPR.2	TAVIPINGS[Ph]PRT[Ph]PR		7219.33	5030.63	10138.7		12256.6		6394.96	5393.42	24253.5	4444.24
P06400	RB_HUMAN	TLQTDSIDSFETQRTPR.3	TLQTDSIDS[Ph]FETQRTPR		45053.3	35228.8	65175.9	53822.4	45730.3		42788.4	32356.9	50999.5	44359.9	36881.3
P06400	RB_HUMAN	TLQTDSIDSFETQRTPR.3	TLQTDSIDSFETQRT[Ph]PR		48863.3	38422.4	72208	53868.7	48139.8		46773.6	35220.2	55170.6	48618.5	41991.4
P06454	PTMA_HUMAN	SDAAVDTSSEITTK.2	[ac]S[Ph]DAAVDTSSEITTK	2.4317e+06	1.9601e+06	3.43206e+06	1.67305e+06	2.1306e+06	4.52467e+06	2.36342e+06	2.38369e+06	3.26392e+06	1.63635e+06	1.23217e+06	4.71893e+06
P06454	PTMA_HUMAN	SDAAVDTSSEITTK.2	[ac]SDAAVDT[Ph]S[Ph]SEITTK	12948.5	13225.9	14127.9	21750	9195.21	19707.6	25275.9	18309	20093.2	63662.4	8878.74	72441.8
P06454	PTMA_HUMAN	SDAAVDTSSEITTK.2	[ac]SDAAVDT[Ph]SSEITTK	385884	275193	382169	341536	422904	480330	381021	307552	344508	387927	301519	531190
P06454	PTMA_HUMAN	SDAAVDTSSEITTK.2	[ac]SDAAVDTS[Ph]SEITTK	404750	293001	400187	359677	450422	504249	398508	324682	362422	409981	319902	560595
P06454	PTMA_HUMAN	SDAAVDTSSEITTK.2	[ac]SDAAVDTSS[Ph]EITTK	397029	285198	392850	335972	438397	495161	391586	317571	356291	407314	322229	548034
P06454	PTMA_HUMAN	SDAAVDTSSEITTK.2	S[Ph]DAAVDTSSEITTK	122801	157389	123479	41399	93636.2	161478	120738	83133.5	106209	56117.8	57368.4	235558
P06493;P24941;Q00526	CDK1_HUMAN;CDK2_HUMAN;CDK3_HUMAN	IGEGTYGVVYK.2	IGEGT[Ph]Y[Ph]GVVYK	42929.1	33907	44092.7	49459.3	12066.2	36598.9	44556.4	36598.9	41597.1	69785	20849.6	26374.5
P06493;P24941;Q00526	CDK1_HUMAN;CDK2_HUMAN;CDK3_HUMAN	IGEGTYGVVYK.2	IGEGTY[Ph]GVVYK	213116	220210	376345	332775	189036	179769	205873	320407	371308	280191	109538	122811
P06733	ENOA_HUMAN	SGKYDLDFK.2	S[Ph]GKYDLDFK	8776.49	7471.32	4171.64	5999.2	4643.47	6116.24	10653.8	9442.13	4337.34	6899.28	6185.15	4599.4
P06748	NPM_HUMAN	CGSGPVHISGQHLVAVEEDAESEDEEEEDVK.4	C[cam]GSGPVHISGQHLVAVEEDAES[Ph]EDEEEEDVK	89961.8	97273.9	125650	111083	270511	119855	126761	126974	67299	95354.7	138087	174362
P06748	NPM_HUMAN	DELHIVEAEAMNYEGSPIK.3	DELHIVEAEAM[ox]NYEGS[Ph]PIK	21092.4	21475.4	81667.9	120231	38581.6	24766.2	9427.12	13679.9	47726.6	39196.3	17168.2	23289.5
P06748	NPM_HUMAN	DELHIVEAEAMNYEGSPIK.3	DELHIVEAEAMNYEGS[Ph]PIK	35892.2	76930	103537	120236	42881.4	95617.7	18600.6	54146.9	66738.2	101796	30993.3	72615.1
P06748	NPM_HUMAN	DSKPSSTPR.2	DSKPS[Ph]STPR	11935.2	6137.06	19833.3	39675.4	1117.57			8247.56	72527.9		14821.8	5083.53
P06748	NPM_HUMAN	DSKPSSTPR.2	DSKPSST[Ph]PR	12672	6387.43	3415.67	31335	15473.5		63091.6	8486.67	76932.8	12839.6	36702.7
P06748	NPM_HUMAN	GGSLPKVEAK.2	GGS[Ph]LPKVEAK	14135.4		27330.5	38129.6	19202.1	4698.81	24369.1	6553.71	38237.7	91939.8	33131.4	2265.08
P06748	NPM_HUMAN	GQESFKK.2	GQES[Ph]FKK	1188.31			5906.19	257.244	474.716	48350.8	54531.3	4837.96	6760.83
P06748	NPM_HUMAN	LLSISGKR.2	LLSIS[Ph]GKR	4699.86	1040.05	4220.81	8700.53	4651.27		4963.43	2998.1	10426.6	15829.3	7527.28
P06748	NPM_HUMAN	MQASIEK.2	MQAS[Ph]IEK	7972.55	775.228	10495.6	22513.6	4165.74	4679.2	12768.8	3461.1	30202.1	25777.6	2844.11
P06748	NPM_HUMAN	SIRDTPAK.2	SIRDT[Ph]PAK	13347.4	7560.87	22053.8	51573.6	26897.1	5094.12	25265.2	16035.9	78134	89642.7	31528
P07814	SYEP_HUMAN	EYIPGQPPLSQSSDSSPTR.2	EYIPGQPPLS[Ph]QSS[Ph]DSSPTR	35806.3	13814.8	41451.8	55997.3	126026	138153	47145.5	17673	44874.5	73303.5	55804.4	185235
P07814	SYEP_HUMAN	EYIPGQPPLSQSSDSSPTR.2	EYIPGQPPLSQS[Ph]SDS[Ph]SPTR	33427.3	9826.98	36295.3	49949.6	108229	112122	39414.9	16273.4	37618.5	64266.4	51464.9	147393
P07900	HS90A_HUMAN	DKEVSDDEAEEK.2	DKEVS[Ph]DDEAEEK	69554.4	90631.5	86550.7	87583.8	173000	93917.4	51810.6	61922.1	97211.5	96016.1	93424.1	84136.2
P07900	HS90A_HUMAN	DKEVSDDEAEEKEDK.3	DKEVS[Ph]DDEAEEKEDK	13042.4	29393	16507	19011.6	29509.2	27091.5	10671.6	20536	17223.1	21083.5	20786.2	20493
P07900	HS90A_HUMAN	EEKESEDKPEIEDVGSDEEEEK.3	EEKESEDKPEIEDVGS[Ph]DEEEEK	8622.48	10969.5	10069.8	13221.1	25570.7		9049.55	10962.8	8110.26	9806.01	23245.7	12961.2
P07900	HS90A_HUMAN	ESEDKPEIEDVGSDEEEEK.2	ESEDKPEIEDVGS[Ph]DEEEEK	446009	638509	655235	656404	1.77579e+06	871792	362751	461703	702347	645247	817101	814085
P07900	HS90A_HUMAN	ESEDKPEIEDVGSDEEEEK.3	ESEDKPEIEDVGS[Ph]DEEEEK	476001	566963	639320	669152	1.87587e+06	901634	332580	462489	632242	521356	934334	740282
P07900	HS90A_HUMAN	ESEDKPEIEDVGSDEEEEKK.2	ESEDKPEIEDVGS[Ph]DEEEEKK	314181	874975	348848	455444	1.00641e+06	1.2317e+06	215940	338976	494945	356691	496865	608102
P07900	HS90A_HUMAN	ESEDKPEIEDVGSDEEEEKK.3	ESEDKPEIEDVGS[Ph]DEEEEKK	1.99247e+06	5.02473e+06	2.37793e+06	2.62473e+06	6.41751e+06	3.46505e+06	1.39688e+06	2.1749e+06	3.19252e+06	2.05025e+06	2.96904e+06	3.82322e+06
P07900	HS90A_HUMAN	ESEDKPEIEDVGSDEEEEKK.4	ESEDKPEIEDVGS[Ph]DEEEEKK	140661	193434	179702	194218	236267	257165	104873	161519	227949	111687	187236	266707
P07910	HNRPC_HUMAN	MESEGGADDSAEEGDLLDDDDNEDR.3	MESEGGADDS[Ph]AEEGDLLDDDDNEDR	475621	564804	602960	434214	779561	476490	391021	449552	549725	256999	443021	511533
P07910	HNRPC_HUMAN	NDKSEEEQSSSSVK.2	NDKS[Ph]EEEQSSSSVK	177560	190337	97117.5	111024	112133	32833.8	204588	248528	99813.4	113820	139192	61846.9
P07910	HNRPC_HUMAN	NDKSEEEQSSSSVK.3	NDKS[Ph]EEEQSSSSVK	8256.87	13168.2	5538.95	6491.08	9746.33	1533.4	6326.33	9290.55	6747.6	6879.05	9312.82	6257.27
P07910	HNRPC_HUMAN	SEEEQSSSSVKKDETNVK.3	SEEEQSSS[Ph]SVKKDETNVK	3854.68	5749.89	3964.8	2946.33	4303.92	4323.1	3326.76	4044.14	4413.17	3607.25	5459	3037.69
P07948	LYN_HUMAN	DSLSDDGVDLK.2	DSLS[Ph]DDGVDLK	14713.3	32004.6	2779.73	14551.8	68076.2	11212.2	17488.1	25441.1	2943.01	13756.1	50639.9	11552.5
P07948	LYN_HUMAN	GKDSLSDDGVDLK.2	GKDSLS[Ph]DDGVDLK	97463.8	214008	31574.4	124437	360720	65861.9	96544.8	199946	35522.2	115893	210861	45657.2
P07948	LYN_HUMAN	GKDSLSDDGVDLK.3	GKDSLS[Ph]DDGVDLK	4776.54	15022.4		6339.34	10861.2	2231.09	5453.62	18872.8	1580.97	5295.58	16887.4
P08237	PFKAM_HUMAN	KRSGEAAV.2	KRS[Ph]GEAAV		650.745	1905.17	2082.7	1444.51			931.985			1150.88	2348.1
P08238	HS90B_HUMAN	EKEISDDEAEEEK.2	EKEIS[Ph]DDEAEEEK	156429	161450	151598	186532	305299	156362	94656.9	100476	130807	195174	193028	141988
P08238	HS90B_HUMAN	EKEISDDEAEEEK.3	EKEIS[Ph]DDEAEEEK	10069.8	10441.5	27416.7	10673.9	25498.8	11939.6	9173.15	8717.88	15457	8904.16	11702.1	10579.6
P08238	HS90B_HUMAN	EKEISDDEAEEEKGEK.2	EKEIS[Ph]DDEAEEEKGEK	58085	83567.9	65174.3	89403.7	128151	60299.4	48221.3	54232.1	69265.6	89562.2	95244.3	54805.1
P08238	HS90B_HUMAN	EKEISDDEAEEEKGEK.3	EKEIS[Ph]DDEAEEEKGEK	111599	174702	160456	233641	269688	185146	106160	153372	156051	173650	200709	165078
P08238	HS90B_HUMAN	LGIHEDSTNR.2	LGIHEDS[Ph]TNR	2517.09		5136.02	5024.84			2550.97		5149.32	7874.21	2965.35
P08238	HS90B_HUMAN	LGIHEDSTNR.2	LGIHEDST[Ph]NR	2181.95		4491.38	4283.93	2928.19				4065.92	6211.22
P08473	NEP_HUMAN	GKSESQMDITDINTPKPK.3	GKS[Ph]ESQMDITDINTPKPK	53355.1		10210.3				64496.3		16860.6
P08559	ODPA_HUMAN	YGMGTSVER.2	YGM[ox]GT[Ph]SVER	7213.44			3189.2	39196	4291.37	6622.92	3101.65			15303.9
P08559	ODPA_HUMAN	YGMGTSVER.2	YGM[ox]GTS[Ph]VER	6675.6			3215.31	39241.5	4014.09	6692.14		1821.99	1918.45	15303.1
P08559	ODPA_HUMAN	YGMGTSVER.2	YGMGTS[Ph]VER	124893	25433.9	62063	84384	310885	111399	153319	62295.6	83777.4	78391.3	317737	137562
P08575	PTPRC_HUMAN	NRNSNVIPYDYNR.2	NRNS[Ph]NVIPYDYNR	357030	2.23895e+06	2.021e+06	369120	1.96729e+06	78366	421920	2.26913e+06	2.84077e+06	517404	1.42475e+06	95445.1
P08575	PTPRC_HUMAN	NRNSNVIPYDYNR.3	NRNS[Ph]NVIPYDYNR	254085	1.63452e+06	1.47801e+06	266455	1.31433e+06	71564.3	308308	2.01574e+06	1.70751e+06	324493	1.04161e+06	74661.5
P08621	RU17_HUMAN	GGGGGQDNGLEGLGNDSR.2	GGGGGQDNGLEGLGNDS[Ph]R	76407.1	238970	139424	150935	527367	203954	97861.3	214928	153064	190721	278933	270383
P08621	RU17_HUMAN	YDERPGPSPLPHR.2	YDERPGPS[Ph]PLPHR	48336.5	78321.6	62360.7	87321.8	209568	32840.3	30767.2	63594.2	82080.1	60649.3	167569	21502.9
P08621	RU17_HUMAN	YDERPGPSPLPHR.3	YDERPGPS[Ph]PLPHR	110491	114776	188294	238329	375098	104804	107051	174606	250875	125567	304603	79977.5
P08631;P07948	HCK_HUMAN;LYN_HUMAN	VIEDNEYTAR.2	VIEDNEY[Ph]TAR		2741.71		1540.46	19297.3			6357.49		1470.12	20520.9	1365.79
P08670	VIME_HUMAN	ETNLDSLPLVDTHSK.3	ET[Ph]NLDSLPLVDTHSK		23458.7			44579.4	15260		28601.5			38992.3	16215.6
P08670	VIME_HUMAN	LRSSVPGVR.2	LRS[Ph]SVPGVR	1240.85	10160.6		1060.24	18018.9	10377.1	23674.2	13891.5			23951.9	12088
P08670	VIME_HUMAN	SLYASSPGGVYATR.2	SLYAS[Ph]SPGGVYATR	2664.31	42649.4			121401	46371.5		47627.9	1886.21	4521.1	83449.3	55198.4
P08670	VIME_HUMAN	SLYASSPGGVYATR.2	SLYASS[Ph]PGGVYATR		41866		2323.94	97334.2	34956.6		40089.9			72141	35865.5
P09086	PO2F2_HUMAN	TSPFSVSPTGPSTK.2	TS[Ph]PFSVS[Ph]PTGPSTK	3049.99	12362.6	12256.2	26266.7	28633.9		5357.92	18495	12539.8	31834.4	17645.5
P09086	PO2F2_HUMAN	TSPFSVSPTGPSTK.2	TSPFSVS[Ph]PTGPSTK		28274.4	10789.4	68045.7	73457.4			35682.3	13335.4	38731.2	47906
P09429	HMGB1_HUMAN	KHPDASVNFSEFSK.3	KHPDAS[Ph]VNFSEFSK	3176.97	5047.81	3396.74	3925.8	1734.47	10509.9	5219.02	5042.87	6369.04	6111.46	2156.91	10940.2
P09601	HMOX1_HUMAN	DQSPSRAPGLR.2	DQS[Ph]PSRAPGLR		9363.63	5573.43	11378.4	2284.62		6528.33	26552		36158	7446.74
P09651	ROA1_HUMAN	NQGGYGGSSSSSSYGSGR.2	NQGGYGGSSSSS[Ph]SYGSGR	9672.91	12989.3	11096.6	11657.5	14768.6	7918.36	8287.79	12623.4	11520.7	16848.6	17685.6	17469.6
P09651	ROA1_HUMAN	SESPKEPEQLR.2	SES[Ph]PKEPEQLR	739200	2.1185e+06	1.07995e+06	543474	1.73132e+06	1.77597e+06	483076	1.72172e+06	1.08012e+06	473562	1.38555e+06	1.71422e+06
P09651	ROA1_HUMAN	SESPKEPEQLR.3	SES[Ph]PKEPEQLR	144075	154917	341339	217914	296051	383774	196054	447779	331597	130056	228358	413076
P09651	ROA1_HUMAN	SESPKEPEQLRK.2	SES[Ph]PKEPEQLRK	165216	835073	184872	169977	307746	398524	220299	541555	189104	209282	442724	444086
P09651	ROA1_HUMAN	SESPKEPEQLRK.3	SES[Ph]PKEPEQLRK	264501	737323	462447	325244	264906	815639	385006	873135	402702	282764	442430	754653
P09651	ROA1_HUMAN	SKSESPKEPEQLR.2	[ac]S[Ph]KSES[Ph]PKEPEQLR	183429	749995	189936	157345	270870	451626	177022	373246	192060	251328	402904	629377
P09651	ROA1_HUMAN	SKSESPKEPEQLR.2	[ac]S[Ph]KSESPKEPEQLR	6533.18	12108.9	9261.18	7294.5	11308.9	9687.09	5463.69	10615.8	8842.92	11185.4	15256.2	10948.4
P09651	ROA1_HUMAN	SKSESPKEPEQLR.2	[ac]SKS[Ph]ES[Ph]PKEPEQLR	121570	433563	129417	103026	177715	298885	110751	246267	127684	165707	251542	397754
P09651	ROA1_HUMAN	SKSESPKEPEQLR.3	[ac]S[Ph]KS[Ph]ESPKEPEQLR	51305	165600	60235.5	58269.7	130516	168163	63852.7	129502	76901.3	65390.7	95875.7	248411
P09651	ROA1_HUMAN	SKSESPKEPEQLR.3	[ac]S[Ph]KSES[Ph]PKEPEQLR	61455.8	185244	73924.3	64996.3	157012	204267	78358.2	156421	95863.6	79376.3	114666	302586
P09651	ROA1_HUMAN	SSGPYGGGGQYFAKPR.2	S[Ph]SGPYGGGGQYFAKPR	4583.07	5325.14	5673.57	5155.6			5407.91	6571.57	8190.47	11719.1	8062.28	213826
P09651	ROA1_HUMAN	SSGPYGGGGQYFAKPR.3	S[Ph]SGPYGGGGQYFAKPR	14437.5	21629	21997.6	11863.9	1850.65	24687.8	20870	26014.6	29614.6	32773.2	7764.62	24994.5
P09661	RU2A_HUMAN	SKTFNPGAGLPTDKK.3	SKT[Ph]FNPGAGLPTDKK			18396.8						29689.4	29811.6
P09884	DPOLA_HUMAN	SIGASPNPFSVHTATAVPSGK.3	S[Ph]IGASPNPFSVHTATAVPSGK	23648.7	14823.4	41729.1	17877.1	9331.68	13875.8	21304.8		28943.3	18075.3	5941.74
P09972	ALDOC_HUMAN	RLSQIGVENTEENRR.3	RLS[Ph]QIGVENTEENRR	571.014		18842.4	322.067	2795.09		1190.77	426.486	18654.4		3446.32
P0C1Z6	TFPT_HUMAN	LLPYPTLASPASD.2	LLPYPTLAS[Ph]PAS[Ph]D	48977.4	17569.6	127394	59128		61375.5	45585.8	23013.9	95817.9	73446	34846.2	113716
P0C1Z6	TFPT_HUMAN	LLPYPTLASPASD.2	LLPYPTLASPAS[Ph]D	35619	112852	100591	81358.3	157666	62049.9	33134.6	99041	78345.5	62372.6	222692	66592.7
P0C1Z6	TFPT_HUMAN	RTPAPPEPGSPAPGEGPSGR.3	RTPAPPEPGS[Ph]PAPGEGPSGR	41874.5	74978.7	41407.4	30027.9	88333.3	21793.7	36378.8	43634.4	40996.8	28262.9	58108.2	25227.6
P10398;P04049	ARAF_HUMAN;RAF1_HUMAN	SASEPSLHR.2	SAS[Ph]EPSLHR	107725	112084	117814	249453	166153	70877.2	114668	153244	132957	221678	180525	68193.1
P10412	H14_HUMAN	KAPKSPAK.2	KAPKS[Ph]PAK		135551	40393.6	39725.9		95058.5	65203.6				7711.69	41422.9
P10412	H14_HUMAN	KATGAATPKK.2	KATGAAT[Ph]PKK	12691.6	10429.9	6664.83	4226.48		6349.84	12777.2	20268.9	6492.57		1937.42
P10412	H14_HUMAN	SETAPAAPAAPAPAEKTPVK.2	[ac]S[Ph]ETAPAAPAAPAPAEKT[Ph]PVK	126391	247087	55891.3	51712.4	290092	871104	130231	267062	482852	121483	192417	137962
P10412	H14_HUMAN	SETAPAAPAAPAPAEKTPVK.2	[ac]SETAPAAPAAPAPAEKT[Ph]PVK	776421	790436	501134	527308	333308	976085	694803	1.12172e+06	591853	777781	238001	537168
P10412	H14_HUMAN	SETAPAAPAAPAPAEKTPVK.3	[ac]S[Ph]ETAPAAPAAPAPAEKT[Ph]PVK	19412	44334.3	7508.77		98892.1	327123	11492.6	59812.4	129257
P10412	H14_HUMAN	SETAPAAPAAPAPAEKTPVK.3	[ac]SETAPAAPAAPAPAEKT[Ph]PVK	275390	214006	171203	155195	110004	353516	225311	429157	162602	182383	76128.9	171882
P10412	H14_HUMAN	SETAPAAPAAPAPAEKTPVK.3	SETAPAAPAAPAPAEKT[Ph]PVK	26463.7	31925.1	18597.2	10487.5	11920.5	36030.1	18950.9	41348.7	15828.7	14655.4	7029.01	22079.8
P10412	H14_HUMAN	SETAPAAPAAPAPAEKTPVKK.2	[ac]SETAPAAPAAPAPAEKT[Ph]PVKK	66219.6	138614	27671.7	18156.6	17194.3	40073.3	39427.8	142855	19344.5	45377.3	21982.6	33537.9
P10412	H14_HUMAN	SETAPAAPAAPAPAEKTPVKK.3	[ac]S[Ph]ETAPAAPAAPAPAEKT[Ph]PVKK	11718.3	17603	2838.83	2019.9		14878.1	7618.22	17105.8	1315.69	5158.21		7183.71
P10412	H14_HUMAN	SETAPAAPAAPAPAEKTPVKK.3	[ac]SETAPAAPAAPAPAEKT[Ph]PVKK	186646	274930	69243.4	54414.9	97443.7	112618	105368	368088	39053.4	60325.5	62801.5	79593.8
P10644	KAP0_HUMAN	EDEISPPPPNPVVK.2	EDEIS[Ph]PPPPNPVVK	348571	181158	236790	178709	998402	14834.6	245471	168100	260858	115818	459672
P10644	KAP0_HUMAN	TDSREDEISPPPPNPVVK.2	TDSREDEIS[Ph]PPPPNPVVK	397866	234213	243720	287312	1.13509e+06		412599	231069	365775	244675	463297
P10644	KAP0_HUMAN	TDSREDEISPPPPNPVVK.3	TDSREDEIS[Ph]PPPPNPVVK	1.24068e+06	673873	834127	908421	3.68088e+06	66721.6	1.28303e+06	737099	1.01054e+06	641971	1.5106e+06	20393.6
P10809	CH60_HUMAN	TVIIEQSWGSPK.2	TVIIEQSWGS[Ph]PK	20733.3	9717.28	19017	48320.8	33294.6	20086.3	19543.8	13331.7	18655.2	32809	38699.1	7547.57
P11142	HSP7C_HUMAN	DISENKR.2	DIS[Ph]ENKR	18044.6	12535.3	20064.7	34425.9	18440.8	8803.53	16204.5	10563.7	28086.5	25933.8	14276.6	10295
P11142	HSP7C_HUMAN	GRLSKEDIER.3	GRLS[Ph]KEDIER			10600.1	1529.88	1814.71		2872	1776.21	14620.5	1961.51	606.893
P11171	41_HUMAN	EESPQSKAETELK.2	EES[Ph]PQS[Ph]KAETELK	11614.8	19050.4	6221.08	7920.19	4055.28	21188.3	6347.17	18950.1	5695.45	9779.35	8943.76	26610.4
P11171	41_HUMAN	HHASISELKK.3	HHAS[Ph]ISELKK	34.757		923.447	2848.9				698.28	233.239	1948.11	180.067
P11171	41_HUMAN	IEVKEESPQSK.2	IEVKEES[Ph]PQSK	6032.29	8171.48	10361.5	4245.15		5862.13	6317.17	6862.96	12342.1	4395.76		4705.33
P11171	41_HUMAN	IEVKEESPQSK.3	IEVKEES[Ph]PQSK	883.626	155.569	1855.85	723.658			1441.17	1217.51	2943.2
P11171	41_HUMAN	IEVKEESPQSKAETELK.3	IEVKEES[Ph]PQS[Ph]KAETELK	10511.6	29342.2	4175.15	11962.8		38460.7	11463.9	29411.9	2955.17	19443.8	3359.39	66161.6
P11171	41_HUMAN	LSTHSPFR.2	LSTHS[Ph]PFR	1872.41	2033.1	1734.06	4853.36	9770.73		2047.26	3080.78	2445.58	4215.03	8464.94
P11171	41_HUMAN	SLDGAAAVDSADR.2	S[Ph]LDGAAAVDSADR	36823.5	45059.4	122614	26893.8	26124.3	47535	28478.4	37812.4	113314	25570.4	26801.3	54844.8
P11171	41_HUMAN	SPRPTSAPAITQGQVAEGGVLDASAK.3	SPRPTSAPAIT[Ph]QGQVAEGGVLDASAK		9072.36	44432.2	2041.31	3698.98			5994.32	48839.5
P11216;P11217	PYGB_HUMAN;PYGM_HUMAN	KQISVR.2	KQIS[Ph]VR	51276.1	8671.84	7434	18866.6	20505.5	51225.2	50015	25484.2	9939.93	11400.6	20945.8	52373.1
P11274	BCR_HUMAN	HQDGLPYIDDSPSSSPHLSSK.3	HQDGLPYIDDS[Ph]PSSSPHLSSK	71235.9	10683.1		4114.03		45063.5	76755	21626.3	865.4	3948.11	4435.7	36682.5
P11387	TOP1_HUMAN	SGDHLHNDSQIEADFR.3	[ac]SGDHLHNDS[Ph]QIEADFR	82073.4	44628.3	84063.9	167190	59342.8	59223.6	92016.3	48579.3	94418	203827	74457.8	46045.6
P11388	TOP2A_HUMAN	GSVPLSSSPPATHFPDETEITNPVPK.3	GSVPLSS[Ph]SPPATHFPDETEITNPVPK	193398	294863	188754	229126	507539	186775	182315	285181	245447	194785	300560	177225
P11388	TOP2A_HUMAN	GSVPLSSSPPATHFPDETEITNPVPK.3	GSVPLSSS[Ph]PPATHFPDETEITNPVPK	172893	258659	170348	208336	442855	164767	163015	254257	223231	178602	263002	163169
P11388	TOP2A_HUMAN	IKNENTEGSPQEDGVELEGLK.3	IKNENTEGS[Ph]PQEDGVELEGLK	181411	225211	306539	400906	272735	252917	203817	291825	325014	375991	212900	242671
P11388	TOP2A_HUMAN	KPSTSDDSDSNFEK.2	KPS[Ph]T[Ph]S[Ph]DDS[Ph]DSNFEK	3245.38	19534.2	3432.31		8911.19	10057.4						23720.2
P11388	TOP2A_HUMAN	MEVSPLQPVNENMQVNK.2	[ac]MEVS[Ph]PLQPVNENMQVNK	25344.9	13738.8	28522	57107.2	20716.7	19344.3	29605.4	24058.7	47260.4	66764.2	19625.2	41744.8
P11388	TOP2A_HUMAN	NENTEGSPQEDGVELEGLK.2	NENTEGS[Ph]PQEDGVELEGLK	31450.7	63290	46314.9	61926	49314.5	69623.8	35846.2	47230.1	59482.2	77788.4	30332.6	88491.9
P11388	TOP2A_HUMAN	RLSVER.2	RLS[Ph]VER	1344.69	1070.37	1948.88	3196.19	1135.99	970.952	1288.24	640.385	3047.81	3063.28	827.755
P11388	TOP2A_HUMAN	SVVSDLEADDVK.2	S[Ph]VVSDLEADDVK	10843.9	3612.5	4973.21	3868.69	4567.9	22175.8	8454.01	4797.26	4060.76	6227.03	6566.86	18959.1
P11388	TOP2A_HUMAN	SVVSDLEADDVK.2	SVVS[Ph]DLEADDVK	85749.6	120990	59755.8	84658.3	72186.5	132381	86279.9	115934	81286.7	86907.5	69567.4	138218
P11388	TOP2A_HUMAN	TQMAEVLPSPR.2	TQMAEVLPS[Ph]PR	83981.4	70841	105958	152062	84694.5	48937.9	80772.1	97196.5	144398	205454	85821.7	23601.3
P11388	TOP2A_HUMAN	VPDEEENEESDNEKETEK.2	VPDEEENEES[Ph]DNEKETEK	51646.5	93026.8	77373.3	100903	91150.4	71018.6	36263.2	79877.4	85812.8	102257	83576.1	71832.4
P11388	TOP2A_HUMAN	VPDEEENEESDNEKETEK.3	VPDEEENEES[Ph]DNEKETEK	101150	186274	133258	133068	128997	145802	67596.9	146985	148543	141171	138892	147863
P11388	TOP2A_HUMAN	YLEESDEDDLF.2	YLEES[Ph]DEDDLF	111645	93554.8	189175	191324	143550	115240	75894	105790	177289	156536	95613.6	130393
P11532	DMD_HUMAN	TSSPKPR.2	TSS[Ph]PKPR	3733.57	4032.63	8511.62	6686.75		112651		2655.21	4856.57			2425.08
P11717	MPRI_HUMAN	ALSSLHGDDQDSEDEVLTIPEVK.3	ALSSLHGDDQDS[Ph]EDEVLTIPEVK	67798.2	136354	35386.5	135294	469744	395769	67480.4	140781	32753.7	139224	347926	415556
P11836	CD20_HUMAN	EEVVGLTETSSQPK.2	EEVVGLTETS[Ph]SQPK	23514.9	40046.1	44215.1	34179.6	70094.4	15645.3	17922.3	36227	53139.5	29283.4	43055.1	23412.3
P11836	CD20_HUMAN	EEVVGLTETSSQPK.2	EEVVGLTETSS[Ph]QPK	18682.7	33848.9	37845.7	28728.7	60279	16429.4	16403.9	31432.4	45189.4	22702.4	36546.7	20177.8
P11836	CD20_HUMAN	GPIAMQSGPKPLFR.3	GPIAMQS[Ph]GPKPLFR	1568.27	461.957	4774.57	3508.02	1281.52		780.428	2150.53	14600.6	4452.6	2716.41
P11836	CD20_HUMAN	NSVNGTFPAEPMK.2	NS[Ph]VNGTFPAEPM[ox]K	86768.2	104823	221721	66851.1	144605	58183.9	63354.8	99749.9	168348	68977	54965.1	68788.1
P11836	CD20_HUMAN	NSVNGTFPAEPMK.2	NS[Ph]VNGTFPAEPMK	24995.3	179060	173413	28757.3	135899	107364	77950.6	216501	177556	112353	58689.1	106578
P11836	CD20_HUMAN	PKSNIVLLSAEEK.2	PKS[Ph]NIVLLSAEEK			11493.3		2137.62		2642.84		14963.1
P11836	CD20_HUMAN	SNIVLLSAEEK.2	S[Ph]NIVLLSAEEK	2305.34		266492	10857.6	67453.5	4313.25		7345.13	295910	10137.2	39083.5
P12268	IMDH2_HUMAN	GMGSLDAMDK.2	GMGS[Ph]LDAMDK	17611.9	11685.5	12563.2	6607.54	20192.7	9373.23	15001.7	10317	12681	7435.33	27636.4	7088.48
P12268	IMDH2_HUMAN	LVGIISSR.2	LVGIIS[Ph]SR	22512.2	17735.5	12613.7	3002.03	25011.3	15381.4	17015.8	18921.7	12131.1	1831.66	32921	15282.2
P12270	TPR_HUMAN	EGVQGPLNVSLSEEGK.2	EGVQGPLNVS[Ph]LSEEGK	1806.9	3455.79	4285.93	6407.89	4760.63		2034.72		4714.56	5405.65	3332.97
P12270	TPR_HUMAN	TDGFAEAIHSPQVAGVPR.3	TDGFAEAIHS[Ph]PQVAGVPR	67796.8	45550.4	74236.3	22398	91768.1	248920	57893.4	48328.2	92541.6	33230.7	114820
P12694	ODBA_HUMAN	IGHHSTSDDSSAYR.3	IGHHS[Ph]TSDDSSAYR	7439.73	2024.1	2895.66	60.4636	12510	1650.82	3875.02	1485.45	3387.91		7350.07
P12694	ODBA_HUMAN	SVDEVNYWDK.2	S[Ph]VDEVNYWDK	97111	28801.2	49147.4	14374.8	138275	76145.9	77883.2	25967.4	37792.2	8161.7	100177	77161.5
P12694	ODBA_HUMAN	SVDEVNYWDKQDHPISR.3	S[Ph]VDEVNYWDKQDHPISR	37335.1	6007.29	14253.3	7530.7	21476.7	18301.7	49498.2	14008	17894.6	6360.98	49768.3	20444.1
P12980	LYL1_HUMAN	RPSHCELDLAEGHQPQK.3	RPS[Ph]HC[cam]ELDLAEGHQPQK		85.1623	9861.61	156.257				292.113	5888.81	170.342	89.9112
P12980	LYL1_HUMAN	RPSHCELDLAEGHQPQK.4	RPS[Ph]HC[cam]ELDLAEGHQPQK	823.118		16920						8039.71		495.751
P13051	UNG_HUMAN	HAPSPEPAVQGTGVAGVPEESGDAAAIPAK.3	HAPS[Ph]PEPAVQGTGVAGVPEESGDAAAIPAK	31397.3	66677.1	146893	46255.1	32912	43947.3	23361.1	75017.8	161563	35040.4	18365.2
P13639	EF2_HUMAN	AGETRFTDTR.3	AGETRFT[Ph]DTR	548.445		576.147	1909.24	261.121		339.018	438.281	818.943	1754.16	153.621	616.238
P13639	EF2_HUMAN	FTDTRKDEQER.2	FT[Ph]DTRKDEQER	10401.3	4889.12	6397.61	18687.1	8550.27	2867.27	15018.1	9456.02	7554.74	19932	10880.8
P13639	EF2_HUMAN	FTDTRKDEQER.3	FT[Ph]DTRKDEQER	11167.3	5065	7765.85	18463.2	6453.29		12112.3	8652.25	8629.3	46786.6	15123
P13796	PLSL_HUMAN	EGESLEDLMK.2	EGES[Ph]LEDLM[ox]K	21259.9	15082.3	21702.6	21633.1	78994.3	31143.2	17515.1	14600.8	23106.1	16385.8	23682.3	12758.6
P13796	PLSL_HUMAN	EGESLEDLMK.2	EGES[Ph]LEDLMK	475052	338735	284148	445379	829429	245788	473370	368231	336756	284737	871820	230293
P13796	PLSL_HUMAN	GSVSDEEMMELR.2	GS[Ph]VSDEEM[ox]M[ox]ELR	28456.7	22413.4	52749.7	35608.2	105491	28893.7	14998	19504.5	48707.5	42932.9	51433.8
P13796	PLSL_HUMAN	GSVSDEEMMELR.2	GS[Ph]VSDEEM[ox]MELR	58495.2	95593.7	131427	139085	248583	156175	48589.7	54191.1	155171	153905	69671.2	29625.1
P13796	PLSL_HUMAN	GSVSDEEMMELR.2	GS[Ph]VSDEEMM[ox]ELR	74294.3	63241.4	262182	204941	492625	172672	60117.1	52958.2	266387	216777	212338	43843.2
P13796	PLSL_HUMAN	GSVSDEEMMELR.2	GS[Ph]VSDEEMMELR	1.22258e+06	1.92566e+06	2.66169e+06	2.53171e+06	2.9952e+06	2.74735e+06	1.32247e+06	1.23034e+06	3.03645e+06	3.09216e+06	2.21998e+06	644359
P13861	KAP2_HUMAN	GDSESEEDEDLEVPVPSR.2	GDS[Ph]ES[Ph]EEDEDLEVPVPSR	952433	603384	698393	344369	867830	1.55837e+06	906875	461829	722549	301302	574761	1.08006e+06
P13861	KAP2_HUMAN	RVSVCAETYNPDEEEEDTDPR.3	RVS[Ph]VC[cam]AETYNPDEEEEDTDPR	55407.6	20856.5	33918.6	18267.9	37253.2	14718.4	46881.4	21904.7	36222.7	15969.4	26372.2	11938.6
P13861	KAP2_HUMAN	VADAKGDSESEEDEDLEVPVPSR.3	VADAKGDS[Ph]ES[Ph]EEDEDLEVPVPSR	1.85884e+06	900332	854488	378077	641321	1.38876e+06	2.3614e+06	911778	709952	609611	552946	1.92948e+06
P13984	T2FB_HUMAN	HYQGEEKSD.2	HYQGEEKS[Ph]D	3516.7	1987.28	3623.27	4530.99		2787.81	1803.87	4988.45	825.22		591.377
P14317	HCLS1_HUMAN	RSPEAPQPVIAMEEPAVPAPLPK.3	RS[Ph]PEAPQPVIAM[ox]EEPAVPAPLPK	125795	76013.3	191445	224807	240464	60423.7	133022	64167.8	212610	203385	171258	53651.5
P14317	HCLS1_HUMAN	RSPEAPQPVIAMEEPAVPAPLPK.3	RS[Ph]PEAPQPVIAMEEPAVPAPLPK	676014	506977	903468	1.47256e+06	1.15166e+06	279218	825212	488814	1.24524e+06	1.36674e+06	1.32703e+06	256721
P14317	HCLS1_HUMAN	SPEAPQPVIAMEEPAVPAPLPK.2	S[Ph]PEAPQPVIAMEEPAVPAPLPK	183111	160784	316031	425879	281013	109799	249419	157649	380503	541225	532030	107809
P14317	HCLS1_HUMAN	SPEAPQPVIAMEEPAVPAPLPK.3	S[Ph]PEAPQPVIAM[ox]EEPAVPAPLPK	190588	98939.4	320336	338253	315111	69706.1	160166	81063.4	305024	315379	237522	74246.2
P14317	HCLS1_HUMAN	SPEAPQPVIAMEEPAVPAPLPK.3	S[Ph]PEAPQPVIAMEEPAVPAPLPK	727699	515510	989685	1.19271e+06	824199	361121	833627	509491	1.12561e+06	1.47776e+06	1.44082e+06	372555
P14618	KPYM_HUMAN	LDIDSPPITAR.2	LDIDS[Ph]PPITAR	100692	108613	57782.7	176335	125903	41559.6	109753	122712	70019.2	151393	152180	29658.3
P14618	KPYM_HUMAN	SAHQVAR.2	S[Ph]AHQVAR								381.845
P14859	PO2F1_HUMAN	INPPSSGGTSSSPIK.2	INPPSSGGTSS[Ph]SPIK	52431.2	42739.1	32035.6	33601	34667.4	53121.2	69610.2	41359.5	45920.4	25337	37428.9	41479.9
P14859	PO2F1_HUMAN	INPPSSGGTSSSPIK.2	INPPSSGGTSSS[Ph]PIK	54155.7	40927.8	33100.6	34086.3	36671.7	53526.9	65845.8	43638.4	47906.3	24180.8	35073.2	41607
P14921	ETS1_HUMAN	VPSYDSFDSEDYPAALPNHKPK.3	VPS[Ph]YDSFDSEDYPAALPNHKPK	10231.7		10070.4	33792.6	10015.9	11348.7	10035.8	6898.51	9201.27	25970	8405.05
P15056	BRAF_HUMAN	RDSSDDWEIPDGQITVGQR.3	RDSS[Ph]DDWEIPDGQITVGQR	75048.2	27330.1	46605.1	58198.2	78827.4	51531.8	63134	33306.9	37448.3	48280.5	70824.9	47318.8
P15056	BRAF_HUMAN	SASEPSLNR.2	SAS[Ph]EPSLNR	92325.7	27404.6	47332.9	65916.8	81641.3	62097.3	86363.5	36896.2	57870.4	64684.1	68959.8	46568.3
P15056	BRAF_HUMAN	SNPKSPQKPIVR.3	SNPKS[Ph]PQKPIVR	15997.7	2963.89	14404.8	18509.6	8557.13	16362.2	22890.3	9168.75	17237.8	9606.69	16321.6	6402.87
P15336	ATF2_HUMAN	NDSVIVADQTPTPTR.2	NDSVIVADQT[Ph]PT[Ph]PTR	19454.7	12012.5	10999.8	9543.42		46169.2	17637.6	6824.06	14007.6	20532.6	2676.72	59731.9
P15531	NDKA_HUMAN	NIIHGSDSVESAEK.2	NIIHGS[Ph]DSVESAEK	22595.4	17989.3	15851.3	5392.99		6740.19	13356.7	9847.38			14004.8
P15880	RS2_HUMAN	SPYQEFTDHLVK.2	S[Ph]PYQEFTDHLVK	4720.56		15239.1	15741.1	2765.76	8540.56	4122.74		15536.6	11547.1	8410.09
P15880	RS2_HUMAN	THTRVSVQR.2	THTRVS[Ph]VQR		9.58143		1002.79	990.199		121.536		512.235	1828.47	1055.53
P15923	TFE2_HUMAN	AGAPGALSPSYDGGLHGLQSK.3	AGAPGALS[Ph]PSYDGGLHGLQSK	27169.6	34718.8	35910.4	15002	44784	32886.9	30294.7	39834.7	44885.8	9823.02	53840.8	27627.4
P16070	CD44_HUMAN	KPSGLNGEASKSQEMVHLVNK.3	KPSGLNGEASKS[Ph]QEMVHLVNK		37430.4		133562	157260			59469.6		226246	131358
P16070	CD44_HUMAN	KPSGLNGEASKSQEMVHLVNK.4	KPSGLNGEASKS[Ph]QEMVHLVNK		52913.9		171277	52070.6			103191		274828	158752
P16070	CD44_HUMAN	SQEMVHLVNK.2	S[Ph]QEM[ox]VHLVNK		20775.7		59730	115555			18356.6		61858.9	70996.5
P16070	CD44_HUMAN	SQEMVHLVNK.2	S[Ph]QEMVHLVNK		175507		1.22565e+06	754354			363955		1.19794e+06	960346
P16070	CD44_HUMAN	SQEMVHLVNK.3	S[Ph]QEMVHLVNK		4988.95		29991.4	8609.04			11255		28415.8	20690.9
P16333	NCK1_HUMAN	RKPSVPDSASPADDSFVDPGER.3	RKPS[Ph]VPDSASPADDSFVDPGER	317983	93746.7	255558	105401	141874	117415	197967	88328.8	178011	37125	89663.2	52179
P16383	GCFC2_HUMAN	TLDVSTDEEDKIHHSSESK.3	TLDVS[Ph]T[Ph]DEEDKIHHSSESK	14064.5	11420	11958.1	7878.55	7909.66	19681.3	12662.9	4146.04	10193.8	10295.7	9326.82	21439.9
P16401	H15_HUMAN	AKKPAGATPK.2	AKKPAGAT[Ph]PK	64123.8	21375	9867.7	20488.5	22416.3	35675	44660.8	42028	15148	39236	17916.7	13645.4
P16401	H15_HUMAN	ATKSPAKPK.2	ATKS[Ph]PAKPK	7834.86	8037.92	5129.01	1785.37		7020.1	13366.4	5460.23	62.0964			2435.98
P16401	H15_HUMAN	AVKKTPK.2	AVKKT[Ph]PK	4476.23		291.757					2364.39	162.497
P16401	H15_HUMAN	KPAGATPK.2	KPAGAT[Ph]PK		4273.09	2793.38			7414.52			4793.97			2819.37
P16401	H15_HUMAN	KPAGATPKK.2	KPAGAT[Ph]PKK	1665.03	2018.17		528.556		2228.77	2077.22	2331.52	696.162			1363.42
P16401	H15_HUMAN	SETAPAETATPAPVEK.2	[ac]S[Ph]ETAPAETATPAPVEK	794394	838168	177211	104112	341480	1.19743e+06	681059	1.21656e+06	178494	164031	329962	1.08689e+06
P16401	H15_HUMAN	SETAPAETATPAPVEK.2	[ac]SET[Ph]APAETATPAPVEK	827029	826913	174377	107739	357363	1.24137e+06	709152	1.26249e+06	184892	170372	343524	1.12422e+06
P16401	H15_HUMAN	SETAPAETATPAPVEK.2	S[Ph]ETAPAETATPAPVEK	41797.4	35749.1	8426.44	4248.86	16085.4	52225.1	50322.3	58943.9	5719.54	7414.84	16682.6	45165.9
P16401	H15_HUMAN	SETAPAETATPAPVEK.2	SET[Ph]APAETATPAPVEK	36261.1	30904.9	6943.36	2345.36	14351.8	45323.8	45365.8	51293.5	4515.84	5457.6	13659.2	37833.4
P16401	H15_HUMAN	SETAPAETATPAPVEK.3	[ac]S[Ph]ETAPAETATPAPVEK		5750.22				17277.7		16510.3				15468
P16401	H15_HUMAN	SETAPAETATPAPVEKSPAK.2	[ac]S[Ph]ETAPAETATPAPVEKS[Ph]PAK	698417	460763	225039	125500	3.34814e+06	1.13706e+06	598980	554822	150380	291141	138055	1.02513e+06
P16401	H15_HUMAN	SETAPAETATPAPVEKSPAK.2	[ac]SETAPAET[Ph]ATPAPVEKS[Ph]PAK	351390	259639	89651.2	73575	127615	413017	349470	276153	157658	309468	87313.5	414850
P16401	H15_HUMAN	SETAPAETATPAPVEKSPAK.2	[ac]SETAPAETAT[Ph]PAPVEKS[Ph]PAK	187871	117122	41953.2	34890.7	55995.6	209354	189377	148768	79042.7	160633	42324	223362
P16401	H15_HUMAN	SETAPAETATPAPVEKSPAK.2	[ac]SETAPAETATPAPVEKS[Ph]PAK	1.10927e+07	1.31546e+07	4.05397e+06	3.08297e+06	4.4894e+06	1.08104e+07	7.93827e+06	1.70669e+07	4.13588e+06	3.36968e+06	4.19301e+06	8.25759e+06
P16401	H15_HUMAN	SETAPAETATPAPVEKSPAK.2	SETAPAETATPAPVEKS[Ph]PAK	324421	443487	151230	146093	150304	553973	298086	503389	177597	253015	139404	331739
P16401	H15_HUMAN	SETAPAETATPAPVEKSPAK.3	[ac]S[Ph]ETAPAETATPAPVEKS[Ph]PAK	123802	72885.5	33511.2	15116.3		253964	98738.9	127782	610841	32211.5	24455.5	192104
P16401	H15_HUMAN	SETAPAETATPAPVEKSPAK.3	[ac]SETAPAETAT[Ph]PAPVEKS[Ph]PAK	141901	81476.6	33506.9	23394.9	53300.6	138709	118350	97701.3	47056.9	87012.8	31793.3	136270
P16401	H15_HUMAN	SETAPAETATPAPVEKSPAK.3	[ac]SETAPAETATPAPVEKS[Ph]PAK	3.06864e+06	3.99866e+06	1.28856e+06	1.14551e+06	2.28173e+06	5.09284e+06	2.6165e+06	6.1137e+06	1.07447e+06	1.08059e+06	1.94956e+06	3.36336e+06
P16401	H15_HUMAN	SETAPAETATPAPVEKSPAK.3	SETAPAETATPAPVEKS[Ph]PAK	407304	391497	183913	133634	215133	414566	378596	590967	197667	200750	153984	371365
P16401	H15_HUMAN	SETAPAETATPAPVEKSPAKK.2	[ac]SETAPAETATPAPVEKS[Ph]PAKK	266475	307130	86116.6	48809.3	83570.3	301937	168179	328358	97891.2	72027.9	102977	156531
P16401	H15_HUMAN	SETAPAETATPAPVEKSPAKK.3	[ac]S[Ph]ETAPAETATPAPVEKS[Ph]PAKK	41985.9	56404.2	16528	7911.95	12274.1	104034	42004.7	41952.5	11445.8	12203.6	14153.1	62901.3
P16401	H15_HUMAN	SETAPAETATPAPVEKSPAKK.3	[ac]SETAPAETAT[Ph]PAPVEKS[Ph]PAKK	55404	27806.6	9703.19	13105.5	16383	52024.6	43316	44966.1	16348.8	68994.4	14161.9	48356.7
P16401	H15_HUMAN	SETAPAETATPAPVEKSPAKK.3	[ac]SETAPAETATPAPVEKS[Ph]PAKK	2.42663e+06	1.97024e+06	806755	498833	1.26862e+06	2.02672e+06	1.4372e+06	2.54443e+06	757969	539563	1.11863e+06	1.61154e+06
P16401	H15_HUMAN	SETAPAETATPAPVEKSPAKK.3	SETAPAETATPAPVEKS[Ph]PAKK	93751.2	109684	55962.6	29926.9	34278.5	214624	82533.6	116689	39736.5	45950.3	39365.9	105923
P16402	H13_HUMAN	KVKTPQPK.2	KVKT[Ph]PQPK	13073.6	6214.18	7751.27	959.717		7400.16	7637.05	2118.04	3380.49		1641.55
P16402	H13_HUMAN	SETAPLAPTIPAPAEK.2	[ac]S[Ph]ETAPLAPTIPAPAEK	428793	136226	174140	45600.9	70519.9	715653	435779	209712	156656	60563.2	71436.2	539298
P16402	H13_HUMAN	SETAPLAPTIPAPAEKTPVK.2	[ac]S[Ph]ETAPLAPTIPAPAEKT[Ph]PVK	27296.5	32946.9	56122.9	38906.9	19173.4	56282.1	28122.5	42261.7	51335.6	61903.8	18791.3	47436.1
P16402	H13_HUMAN	SETAPLAPTIPAPAEKTPVK.2	[ac]SET[Ph]APLAPTIPAPAEKT[Ph]PVK	22691.7	32779.3	48063.8	37422.5		49369.4	23970.5		12612.8			41874.3
P16402	H13_HUMAN	SETAPLAPTIPAPAEKTPVKK.3	[ac]SETAPLAPTIPAPAEKT[Ph]PVKK	266479	87082.4	103278	59454.2	74019.7	294134	183629	111511	101779	55951.2	62057.4	174649
P16402;P10412	H13_HUMAN;H14_HUMAN	RKASGPPVSELITK.3	RKAS[Ph]GPPVSELITK	27438.6	12003	8643.5	2895.11			42555.5	42985.5	14732.6	6189.61	7348.35
P16403	H12_HUMAN	KAAGGATPKK.2	KAAGGAT[Ph]PKK	6375.49	3182.04	2445.63					7010.03
P16403	H12_HUMAN	SETAPAAPAAAPPAEK.2	[ac]S[Ph]ETAPAAPAAAPPAEK	818455	1.57318e+06	204457	79140	397983	1.46335e+06	936317	2.27371e+06	177751	164781	273239	1.03627e+06
P16403	H12_HUMAN	SETAPAAPAAAPPAEK.2	S[Ph]ETAPAAPAAAPPAEK	31706	103031	4192.58	808.81	8747.14	75203.9	26208.8	62200.9	3366.19	2083.29	4426.98	52139.3
P16403	H12_HUMAN	SETAPAAPAAAPPAEK.2	SET[Ph]APAAPAAAPPAEK	21307.3	64359.2	2458.01		5270.74	49957.2	17652.1	41497.7	2459.14	4599.22	8308.05	35144.1
P16403;P16401	H12_HUMAN;H15_HUMAN	KVAKSPK.2	KVAKS[Ph]PK	22147.3	5875.16			1823.71			12587.9	6125.13
P16403;P16402;P10412	H12_HUMAN;H13_HUMAN;H14_HUMAN	KASGPPVSELITK.2	KAS[Ph]GPPVSELITK	98096.7	78977.5	45465.4	7936.31	18869.5	79320.9	117598	102967	53977.2	12076	27532.3	90141
P16403;P16402;P10412	H12_HUMAN;H13_HUMAN;H14_HUMAN	KASGPPVSELITK.3	KAS[Ph]GPPVSELITK	89198	91709.9	47139.4	6863.7	15719.8	93912.5	112979	103641	52919	11640.3	25469.7	91269.4
P16455	MGMT_HUMAN	GAGATSGSPPAGR.2	GAGATS[Ph]GSPPAGR	296538	29541	92444.9	1647.43		42571.8	314701	25568.2	106053	2425.65		37170.9
P16455	MGMT_HUMAN	GAGATSGSPPAGR.2	GAGATSGS[Ph]PPAGR	135911	17097.8	47022.8			13477.2	136254	10874.9	47525	770.506		10764.8
P16455	MGMT_HUMAN	GAGATSGSPPAGRN.2	GAGATSGS[Ph]PPAGRN	26986.4		9741.21				32617.1	2858.44	6689.18
P16885	PLCG2_HUMAN	RNSISLR.2	RNS[Ph]ISLR	994.623		2027.07	1070.86	421.803		1885.5	1436.74	2375.91	306.951	983.015
P16949	STMN1_HUMAN	ESVPEFPLSPPK.2	ESVPEFPLS[Ph]PPK	1.14607e+06	885802	1.91251e+06	1.55953e+06	1.09523e+06	1.39182e+06	878011	546318	2.16318e+06	958153	704825	1.03617e+06
P16949	STMN1_HUMAN	RASGQAFELILSPR.3	RAS[Ph]GQAFELILS[Ph]PR	32100.6	2041.49	67009.3	14295.9	3439.42	71392.5	21533.6	10290.8	59465.5	31534.1		49009
P16949	STMN1_HUMAN	RKSHEAEVLK.2	RKS[Ph]HEAEVLK	97765.3			20448.3			77113	38946	213683	29605.7	35839.4
P16949	STMN1_HUMAN	RKSHEAEVLK.3	RKS[Ph]HEAEVLK	37173.9			14366.4			42102.9	12385.4	219448	12339.8	4609.14
P16949	STMN1_HUMAN	SHEAEVLK.2	S[Ph]HEAEVLK	25635	4772.03	103877	11606.6	6427.13	61126.8	25488.2	12552.6	119212	13033.4	7192.97	59529.3
P16949	STMN1_HUMAN	SKESVPEFPLSPPK.2	SKESVPEFPLS[Ph]PPK	1.33989e+06	1.32774e+06	1.67479e+06	1.5287e+06	1.06708e+06	1.49256e+06	1.02787e+06	914733	1.82995e+06	1.52292e+06	1.07307e+06	1.2107e+06
P16949	STMN1_HUMAN	SKESVPEFPLSPPK.3	SKESVPEFPLS[Ph]PPK	944644	1.06137e+06	1.13076e+06	973108	674217	1.14393e+06	688059	734202	1.13805e+06	879668	681578	779044
P16949	STMN1_HUMAN	SKESVPEFPLSPPKK.3	SKESVPEFPLS[Ph]PPKK	24541.2		33578.7	18947.8	2472.65	18954.8	19948.6	13644.3	31019.5	13656.7	15503.8
P16949;Q93045	STMN1_HUMAN;STMN2_HUMAN	DLSLEEIQK.2	DLS[Ph]LEEIQK	11665.2	7616.76	16254.4	4235.64	2976.18	22045.5	11664.3	6654.94	12526.5	7238.76	4553.22	20645.4
P17029	ZKSC1_HUMAN	EATGLSPQAAQEK.2	EATGLS[Ph]PQAAQEK	9135.64	10092.3	5709.61	4180.98	10069.1	9959.12	5652.93	8608.19	9178.05	4947.19	10029.1	11224.9
P17096	HMGA1_HUMAN	EEEEGISQESSEEEQ.2	EEEEGIS[Ph]QES[Ph]S[Ph]EEEQ	43903.1	173679	16099.2	73077.1	75277.1	3207.42	44619.9	26814.1	16694.1	90764.8	106124	200265
P17096	HMGA1_HUMAN	EEEEGISQESSEEEQ.2	EEEEGISQES[Ph]S[Ph]EEEQ	249946	256094	152976	48551.7	312130	142922	179809	163524	136192	98926.1	244885	312935
P17096	HMGA1_HUMAN	EPSEVPTPK.2	EPSEVPT[Ph]PK	60393.9	8935.73	58859.4	89432.8	56072.5	9868.32	40118.2	23641.8	68076.6	69730.2	22763.3	5052.77
P17096	HMGA1_HUMAN	KLEKEEEEGISQESSEEEQ.2	KLEKEEEEGISQES[Ph]S[Ph]EEEQ	2.03524e+06	2.71555e+06	1.12855e+06	1.12109e+06	1.58911e+06	2.28918e+06	2.02577e+06	2.01377e+06	1.32628e+06	2.19893e+06	2.18818e+06	2.29383e+06
P17096	HMGA1_HUMAN	KLEKEEEEGISQESSEEEQ.2	KLEKEEEEGISQES[Ph]SEEEQ	1.82898e+06	2.37308e+06	417917	942307	1.41011e+06	848991	1.85847e+06	1.76654e+06	1.16647e+06	2.02491e+06	2.04972e+06	2.02116e+06
P17096	HMGA1_HUMAN	KLEKEEEEGISQESSEEEQ.3	KLEKEEEEGISQES[Ph]S[Ph]EEEQ	710443	884867	378461	250951	795935	822253	551590	643648	426983	522156	593586	736231
P17096	HMGA1_HUMAN	KLEKEEEEGISQESSEEEQ.3	KLEKEEEEGISQES[Ph]SEEEQ	522209	649297	108237	200723	553110	239339		456742	313510	380667	415438
P17096	HMGA1_HUMAN	KQPPVSPGTALVGSQK.2	KQPPVS[Ph]PGTALVGSQK	25571.7		12728.1	35270.8	18493.1		15501.6	2647.3	47340.2	84341	20608.6
P17096	HMGA1_HUMAN	KQPPVSPGTALVGSQK.3	KQPPVS[Ph]PGTALVGSQK	119681	18808.9	70804.4	173725	70591.8	17562	117494	13031.9	190508	261646	132648
P17096	HMGA1_HUMAN	KQPPVSPGTALVGSQKEPSEVPTPK.3	KQPPVS[Ph]PGTALVGSQKEPSEVPT[Ph]PK	138678		46711.3	121936	47455.7	25901.8	105671	30637.8	137435	663706	72709
P17096	HMGA1_HUMAN	KQPPVSPGTALVGSQKEPSEVPTPK.3	KQPPVSPGTALVGS[Ph]QKEPSEVPTPK	36674	24477.9	77671.3	154063	90438.8		47567.9	21012.1	142246	353513	96863.7
P17096	HMGA1_HUMAN	KQPPVSPGTALVGSQKEPSEVPTPK.4	KQPPVS[Ph]PGTALVGSQKEPSEVPT[Ph]PK	62040.9		21734.8	50602.3	8027.98		60652.9	18454.9	62973.3	287435	29565.6
P17096	HMGA1_HUMAN	KQPPVSPGTALVGSQKEPSEVPTPK.4	KQPPVSPGT[Ph]ALVGSQKEPSEVPT[Ph]PK	72556.1		42738.4	54719.7	11994.5		38679	25225.1	65729	307614	37673.5
P17096	HMGA1_HUMAN	KQPPVSPGTALVGSQKEPSEVPTPK.4	KQPPVSPGTALVGS[Ph]QKEPSEVPTPK	32940.6	31694.4	63529.6	106956	34535		39404.1	22535.8	104407	217467	80748.3
P17096	HMGA1_HUMAN	KQPPVSPGTALVGSQKEPSEVPTPK.4	KQPPVSPGTALVGSQKEPSEVPT[Ph]PK	51698.9	18425.5	39739.2	48509.9	21370		57936.5	27762.4	54428.1	135302	31962.8
P17480	UBF1_HUMAN	GKLPESPK.2	GKLPES[Ph]PK	24866.4	15936	29690.5	38106.4	24859.7	37117	24102	29936.4	32421.6	24313.3	19360.7	23959.8
P17480	UBF1_HUMAN	GKLPESPKR.2	GKLPES[Ph]PKR	5603.04	5586.15	6268.34	10759.4	7475.42	6427.49	6937.86	6984.54	7280.18		9412.02	4765.51
P17535;P05412	JUND_HUMAN;JUN_HUMAN	LASPELER.2	LAS[Ph]PELER				6256.01	551.684				1409.11	7513.97	1122.53
P17544	ATF7_HUMAN	TDSVIIADQTPTPTR.2	TDSVIIADQT[Ph]PT[Ph]PTR	494.753		12737.1	6918.46		12562.8	2087.55		16936.2	17543.3		17174.1
P17706	PTN2_HUMAN	EDLSPAFDHSPNK.2	EDLSPAFDHS[Ph]PNK	110143	70738.7	101329	120354	260956	142918	115083	80408.4	96568.4	130892	230777	183079
P17706	PTN2_HUMAN	ELSKEDLSPAFDHSPNK.3	ELSKEDLSPAFDHS[Ph]PNK	48544.3	34538.9	58674.6	51272.1	90561.2	72045.1	53398.2	39926	58742	51358.4	84947	71265.2
P17812	PYRG1_HUMAN	GCRLSPR.2	GC[cam]RLS[Ph]PR	32471.1	20682	20960	76470.6	17878.4	19028.2	40395.3	41430.7	23607.6	75716.4	21956.4	14406.5
P17812	PYRG1_HUMAN	SGSSSPDSEITELK.2	S[Ph]GSSS[Ph]PDSEITELK	41046.6	27635.1	32966.6	26778.3	24717.4	39896.7	19022.6	23690.8	23068.1	71227	21624.9	75383.1
P17812	PYRG1_HUMAN	SGSSSPDSEITELK.2	SGS[Ph]SS[Ph]PDSEITELK	47490.2	31851.4	39108	58428.5	27443.4	77662.3	23741.7	28849.3	36494.1	83457.7	25494.3	86458.6
P17812	PYRG1_HUMAN	SGSSSPDSEITELK.2	SGSS[Ph]S[Ph]PDSEITELK	50532.3	34874	41302.3	63766.5	33894.1	68295.5	54876.8	31074.6	43506.7	90239.5	27140.7	69153
P17812	PYRG1_HUMAN	SGSSSPDSEITELK.2	SGSSS[Ph]PDSEITELK	210089	95708.4	227803	147455	231347	282779	155954	70717.6	203377	103538	93580.1	220488
P17812	PYRG1_HUMAN	SGSSSPDSEITELKFPSINHD.3	SGS[Ph]S[Ph]SPDSEITELKFPSINHD	31565.6	10098.5	20342.7	39687.5	8459.64	57243.9	42828.2	12801.6	21853.5	76091.3	13642.5	100188
P17812	PYRG1_HUMAN	SGSSSPDSEITELKFPSINHD.3	SGS[Ph]SS[Ph]PDSEITELKFPSINHD	30377.7	13162.5	17108	38534.9	7236.43	52916.1	41227.5	11673.3	20846.5	73175.1	13139.9	92295.8
P17812	PYRG1_HUMAN	SGSSSPDSEITELKFPSINHD.3	SGSS[Ph]S[Ph]PDSEITELKFPSINHD	34854.6	9215.72	19196.1	44060.2	8834.02	61222	47122.2	13407.4	23560.6	83830.6	14036	105864
P17812	PYRG1_HUMAN	SGSSSPDSEITELKFPSINHD.3	SGSS[Ph]SPDSEITELKFPSINHD	154587	69489.5	111829	113259	122989	106484	134315	58831.7	110376	98639.7	96720.9	89999.8
P17812	PYRG1_HUMAN	SGSSSPDSEITELKFPSINHD.3	SGSSS[Ph]PDSEITELKFPSINHD	142963	65448	103894	106284	116465	100897	124181	56436.8	101645	92686	90254	85627.1
P17844	DDX5_HUMAN	SGYSSDRDR.2	[ac]SGYSS[Ph]DRDR	5055.59	3688.11	4579.48	7410.55	5780.28		4166.89	4147.61	6203.19	10269	6600.86
P17987	TCPA_HUMAN	DDKHGSYEDAVHSGALND.2	DDKHGS[Ph]YEDAVHSGALND	15851	11949.2	11548.5	13108.4	5303.98	7819.66	20271.4	9334.24	11057.3	18669.6	11007.4
P17987	TCPA_HUMAN	DDKHGSYEDAVHSGALND.3	DDKHGS[Ph]YEDAVHSGALND	20526.5	5583.52	12493.7	13657.5	8471.72	4596.99	21101.9	7113.07	9107.73	17547.9	4602.68	5694.48
P17987	TCPA_HUMAN	HGSYEDAVHSGALND.2	HGS[Ph]YEDAVHSGALND	18717.1		13085	15154.3	6214.71		13324.3		12478.1	14503.4	7551.59
P17987	TCPA_HUMAN	HGSYEDAVHSGALND.2	HGSYEDAVHS[Ph]GALND	5391.62	5482.82	6951.64	8068.28	3284.15		6030.82	4253.39	6013.81	7281.04	4254.16
P18583	SON_HUMAN	EDDDVIVNKPHVSDEEEEEPPFYHHPFK.4	EDDDVIVNKPHVS[Ph]DEEEEEPPFYHHPFK	75530.5	162557	97109.2	68852.1	199848	97450.4	74530.6	118981	86510.9	76134.7	80278	96611.3
P18583	SON_HUMAN	EMEHNTVCAAGTSPVGEIGEEK.3	EMEHNTVC[cam]AAGT[Ph]SPVGEIGEEK	62044.8	79065	64893.8	80409.4	89396.8	35000.9	68115.9	85819.8	72424.8	60283.3	94022.5	31087.4
P18583	SON_HUMAN	ESDQTLAALLSPK.2	ESDQTLAALLS[Ph]PK	87718.3	117187	152080	150982	140899	73995.9	68656.1	148112	191148	88094.1	121318	75877.9
P18583	SON_HUMAN	RRSFSISPSR.2	RRS[Ph]FS[Ph]IS[Ph]PSR	23681	58916.1	31000.6	12414	15463	89516	22287.7	38248.6	41334.1	25863.7	35580.4	86798.4
P18583	SON_HUMAN	RRSFSISPSR.3	RRS[Ph]FS[Ph]IS[Ph]PSR	15966.1	23031.4	31216.4	10588.9	8789.05	89094.1	23651.8	37332.3	36039.4	19475	21459.5	89242.6
P18583	SON_HUMAN	RRSFSISPVR.2	RRS[Ph]FS[Ph]IS[Ph]PVR	66640.9	164302	58167.3	83785.4	7283.6	212662	91302.9	137363	86152	150835	77392.3	290292
P18583	SON_HUMAN	RRSFSISPVR.3	RRS[Ph]FS[Ph]IS[Ph]PVR	37153.7	239216	94825.7	90782.9	1334.55	309498	110788	164792	102610	146862	93467.9	396245
P18583	SON_HUMAN	SFSISPSRR.2	S[Ph]FS[Ph]IS[Ph]PSRR	1999.33	16259.9	5302.48	7789.5		37976.8	7638.38	5346.67	2776.16	11155.7	7770.66	33133.9
P18583	SON_HUMAN	SFSISPVR.2	SFS[Ph]IS[Ph]PVR	6861.5	10548.4	10509.1	5100.27	3849.04	11539.1	7683.34	7282.47	8166.03	12197.2	5988.74	14724.4
P18583	SON_HUMAN	SPDPYR.2	S[Ph]PDPYR	8082.52	6786.92	9688.48	6393.99	9863.81	5210.33	9406.02	9439.54	14176.5	6950.21	8907.1	6119.72
P18583	SON_HUMAN	SRSVVR.2	S[Ph]RS[Ph]VVR	2909.61	24791.4	16700.8	12353.6	15768.6	20685	1889.05	23429.3	13581.4			15154.9
P18615	NELFE_HUMAN	SGAHSSASPPR.2	SGAHSS[Ph]ASPPR	26644.8	35612.6	34781	31011.1	30808		34508.8	34753.1	35150.1	27885	25237.7	10130.1
P18615	NELFE_HUMAN	SGAHSSASPPR.2	SGAHSSAS[Ph]PPR	29564.3	38050.4	37860.4	33507.8	34085.7		37524.9	37241.3	40143.8	30523.3	27049.2	11115.7
P18615	NELFE_HUMAN	SISADDDLQESSR.2	SIS[Ph]ADDDLQESSR	182354	260154	37288.6	123866	155078	124728	140177	117001	52783.8	180268	108774	130063
P18615	NELFE_HUMAN	SLSEQPVMDTATATEQAK.2	S[Ph]LSEQPVMDTATATEQAK	29161.2	22424.7	4545.8	29243.9	16511.5	18626	34851.4	17338.8		33640.2	15412.1
P18615	NELFE_HUMAN	SVWGSLAVQNSPK.2	SVWGSLAVQNS[Ph]PK		8101.29	20621.8	11117.6	10966.5	2338.92	16180.6	10711.1	19925.7	13795.2	12566.9
P18669;Q8N0Y7	PGAM1_HUMAN;PGAM4_HUMAN	SYDVPPPPMEPDHPFYSNISK.3	S[Ph]YDVPPPPM[ox]EPDHPFYSNISK		44790.2	197400		38410.7			41819.5	180291		29626
P18669;Q8N0Y7	PGAM1_HUMAN;PGAM4_HUMAN	SYDVPPPPMEPDHPFYSNISK.3	S[Ph]YDVPPPPMEPDHPFYSNISK	26167.1	250589	989356	21878.6	106845	36884.4	19302.4	222899	1.09664e+06	25569.8	132546	42220.4
P18754	RCC1_HUMAN	RRSPPADAIPK.2	RRS[Ph]PPADAIPK	125223	47806.4	81112.2	106019	117664	53576.2	112485	47470.8	101911	118812	71781.8	39949.7
P18754	RCC1_HUMAN	RRSPPADAIPK.3	RRS[Ph]PPADAIPK	167454	16572.7	150291	246087	48950.2	97563.3	265930	91948.8	248273	240878	56155.8	97981.8
P18754	RCC1_HUMAN	SPPADAIPK.1	S[Ph]PPADAIPK	83230.2	40236.2	57179.5	47285	10530.6	58057.7	75749.5	12479.7	90107.9	56863.7	23989.4	28387.2
P18754	RCC1_HUMAN	SPPADAIPK.2	S[Ph]PPADAIPK	46494.6	5562.42	39944.1	29810	21527	32872.3	50637.3	14312.2	49402.9	26834.7	20627.1	30261.4
P18858	DNLI1_HUMAN	AETPTESVSEPEVATK.2	AET[Ph]PTESVS[Ph]EPEVATK	11252.2	11889.9	16777.7	6587.08	6391.39	23737.6	12714.9	11655	16517.5	9568.36	6347.07	27628.7
P18858	DNLI1_HUMAN	AETPTESVSEPEVATK.2	AET[Ph]PTESVSEPEVATK	35870.4	33616.6	59464.4	32418	35330.8	25264.6	33056.3	31031.9	67971.6	22622.9	47481.5	16843.9
P18858	DNLI1_HUMAN	AETPTESVSEPEVATK.2	AETPT[Ph]ESVSEPEVATK	30601.6	29232.6	47605.9	23888.9	26649.8	18929.7	25658.3	25998.5	53458.3	19583.2	37259.5	13503.1
P18858	DNLI1_HUMAN	EWNGVVSESDSPVK.2	EWNGVVSES[Ph]DSPVK	21031.6	17600.1	41875.1	18101.1	27201.9	21301	18180.3	15140.7	47547.1	11907.3	14265	11079
P18858	DNLI1_HUMAN	EWNGVVSESDSPVK.2	EWNGVVSESDS[Ph]PVK	23754.4	19761.5	47885.2	21547.4	28993.6	23362.8	21094.6	17159.3	55122.6	13267.3	16008	14134.1
P18858	DNLI1_HUMAN	EWNGVVSESDSPVKRPGR.3	EWNGVVSESDS[Ph]PVKRPGR	5775.78	6284.55	12588.8	4222.07	2454.69	6637.99	5398.58	6693.15	10550.1	3307.68	3982.95
P18858	DNLI1_HUMAN	TIQEVLEEQSEDEDR.2	TIQEVLEEQS[Ph]EDEDR	69629.8	50384.2	127641	63827.6	89650.5	68921.7	78672.7	51608.9	130262	55600.4	58826.2	70136
P18858	DNLI1_HUMAN	TIQEVLEEQSEDEDREAK.3	TIQEVLEEQS[Ph]EDEDREAK	47440.6	34083.9	51878.6	34510.4	47257.7	38367.6	55250.3	38578.4	55778.6	34399.3	42919.3	50723.8
P18858	DNLI1_HUMAN	VLGSEGEEEDEALSPAK.2	VLGS[Ph]EGEEEDEALS[Ph]PAK	409510	278754	667790	348547	318804	452796	402911	317385	606817	441750	227567	731351
P18858	DNLI1_HUMAN	VLGSEGEEEDEALSPAK.2	VLGS[Ph]EGEEEDEALSPAK	76399.8	73027.7	65843.2	39593.5	87365.8	71905	83496.4	80964.8	82509.3	45663.7	57891.4	72493.1
P18858	DNLI1_HUMAN	VLGSEGEEEDEALSPAK.2	VLGSEGEEEDEALS[Ph]PAK	32934.9	36328.3	51174.4	32973.5	46049.9	56384.9	36446.2	27041.6	57486.1	32037.3	42389.4	36336.5
P18887	XRCC1_HUMAN	AIGSTSKPQESPK.2	AIGSTSKPQES[Ph]PK	16572.6	19935.2	31847.3	40638.7	15633.3	19696.4	14107.3	17433.9	28091.7	28065.3	12808.2	16350.6
P18887	XRCC1_HUMAN	AIGSTSKPQESPK.3	AIGSTSKPQES[Ph]PK	3419.93	2863.38	5175.35	9182.3	3364.61	5669.4	2716.78	2882.17	7203.6	6679.83	2283.68
P18887	XRCC1_HUMAN	AIGSTSKPQESPKGK.3	AIGST[Ph]SKPQESPKGK	3849.92		7424.09	7665.46		3425.77	3891.15	4320.94	7168.75	9096.79
P18887	XRCC1_HUMAN	AIGSTSKPQESPKGK.3	AIGSTS[Ph]KPQESPKGK	3995.11	2807.89	7928.77	8112.53		3486.36	4047.77	4625.69	7727.43	9487.66
P18887	XRCC1_HUMAN	AIGSTSKPQESPKGK.3	AIGSTSKPQES[Ph]PKGK	3103.66	2149.86	6314.23	6391.19	768.042	2834.01	3499.72	4010.18	6137.52	7361.13	1939.44
P18887	XRCC1_HUMAN	TKPTQAAGPSSPQKPPTPEETK.3	TKPTQAAGPS[Ph]SPQKPPTPEETK	48642.3	122117	65874.5	95409.8	89642.9	70981.8	62206.4	61861.1	66386.3	89399.3	85522.1	55394.8
P19174	PLCG1_HUMAN	ERGSDASGQLFHGR.3	ERGS[Ph]DASGQLFHGR	6961.05		9037.3	2618.6	1326.35		6347.93	2278.3	5915.97		1197.18
P19338	NUCL_HUMAN	ALVATPGKK.2	ALVAT[Ph]PGKK	6835.99	946.447	12533.7	19237.3	13013.1	2346.3	8924.23	5702.91	38577.9	34129.6	7342.03	3563.47
P19338	NUCL_HUMAN	AVTTPGKK.2	AVTT[Ph]PGKK	5567.57	1836.4	9392.21	10137.8	6426.15	1589.96	3719.53	3843.29	23618.2	78306	6037.21
P19338	NUCL_HUMAN	KVVVSPTK.2	KVVVS[Ph]PTK	354116	248032	1.14418e+06	830670	304127	312350	367881	401268	1.34386e+06	422131	345235	238293
P19338	NUCL_HUMAN	KVVVSPTKK.2	KVVVS[Ph]PTKK	1.72949e+06	1.77556e+06	4.43763e+06	3.97375e+06	2.55941e+06	1.43555e+06	1.54452e+06	2.1766e+06	4.74312e+06	2.66917e+06	2.02398e+06	1.01907e+06
P19338	NUCL_HUMAN	LELQGPRGSPNAR.3	LELQGPRGS[Ph]PNAR	6824.69		5168.53	10761.8			20903.6	11687.6	4047.26	18993.5	11403.7
P19338	NUCL_HUMAN	VAVATPAKK.2	VAVAT[Ph]PAKK	2063.16		4234.88	4511.31	4857.42		2790.23	1465.53	11192.7	12589.3	4693.86
P19338	NUCL_HUMAN	VVVSPTK.2	VVVS[Ph]PTK	13500.3	8937.66	54743.2	40847.9	25087.7	16444.8	15851.1	19978	78162.6	22241	10967.3	17422.5
P19338	NUCL_HUMAN	VVVSPTKK.2	VVVS[Ph]PTKK	179869	144762	628717	440489	239585	75635.3	178903	234622	527308	205607	223865	92258.5
P19419	ELK1_HUMAN	PAVVLPSAAPAGAAAPPSGSR.3	PAVVLPSAAPAGAAAPPS[Ph]GSR	37641.3		17700.9	17160.2	15366.6		52712.1	26137.7	45717.2	55378.3	35322.4	22011.5
P19484	TFEB_HUMAN	FAAHISPAQGSPKPPPAASPGVR.3	FAAHIS[Ph]PAQGSPKPPPAAS[Ph]PGVR	9936.19	45734.7	18675.9	30547.3	23047.4		18066	78172.5	54444.3	126785	30221.9	39984.6
P19484	TFEB_HUMAN	FAAHISPAQGSPKPPPAASPGVR.3	FAAHISPAQGS[Ph]PKPPPAAS[Ph]PGVR	11276.4	49542.2	21092.2	33089.7	24686.6	15088.3	22704.4	81561.5	56911.3	133938	33139	43315.3
P19484	TFEB_HUMAN	RSSFSMEEGDVL.2	RS[Ph]SFSMEEGDVL	13532.7	47513.7	39002.3	24684.8	40478.2	6952.49	9919.89	31733.7	20761.5	13427.9	21930.5
P19484	TFEB_HUMAN	RSSFSMEEGDVL.2	RSS[Ph]FSMEEGDVL	10972.1	37929.2	31110.8	20180.9	31549.9	6948.82	8602.29	25716.8	16951.8	11315.3	17300.6
P19838	NFKB1_HUMAN	TTSQAHSLPLSPASTR.3	TTSQAHS[Ph]LPLS[Ph]PASTR	3764.26	4929.43	12381.2	13390.6	4953.22		6020.8	7302.49	11971.7	17988.1	5993.38
P20020	AT2B1_HUMAN	IEDSEPHIPLIDDTDAEDDAPTK.3	IEDS[Ph]EPHIPLIDDTDAEDDAPTK	39500.8	8166.1	2221.63	34294.1	73762.6		35685.8	18551.3	4674.03	20925.6	54867.4
P20020	AT2B1_HUMAN	IEDSEPHIPLIDDTDAEDDAPTKR.3	IEDS[Ph]EPHIPLIDDTDAEDDAPTKR	175101	43868.1		188423	199045		231838	50402.6		112245	199102
P20020	AT2B1_HUMAN	IEDSEPHIPLIDDTDAEDDAPTKR.4	IEDS[Ph]EPHIPLIDDTDAEDDAPTKR	65638.3	10882.6		44077.5	38670		64115.8	17253.9		25158.3	61256.1
P20020	AT2B1_HUMAN	SSIHNFMTHPEFR.3	S[Ph]SIHNFMTHPEFR	62881.3	50979.9	16979.4	73118.6	37786	18219.1	65328.9	51809.6	30510.4	106133	63380.4	21523
P20042	IF2B_HUMAN	SGDEMIFDPTMSK.2	[ac]S[Ph]GDEM[ox]IFDPTM[ox]SK	162864	160820	171233	153096	639658	205115	164378	117066	167049	153874	181267	274260
P20042	IF2B_HUMAN	SGDEMIFDPTMSK.2	[ac]S[Ph]GDEM[ox]IFDPTMSK	556458	549275	523503	486404	1.07771e+06	679257	517622	445666	485993	615124	668602	798957
P20042	IF2B_HUMAN	SGDEMIFDPTMSK.2	[ac]S[Ph]GDEMIFDPTM[ox]SK	812632	845302	1.07664e+06	926224	1.53476e+06	827357	786399	652592	1.06821e+06	816416	940491	929843
P20042	IF2B_HUMAN	SGDEMIFDPTMSK.2	[ac]S[Ph]GDEMIFDPTMS[Ph]K	7937.12	8853.89	18817.7	17065.2	5604.58	817.516	8952.83	9060.96	28278.8	35390.6	14752.2
P20042	IF2B_HUMAN	SGDEMIFDPTMSK.2	[ac]S[Ph]GDEMIFDPTMSK	5.67511e+06	4.6745e+06	7.23583e+06	5.71556e+06	4.05383e+06	3.15885e+06	5.33898e+06	5.48607e+06	7.0922e+06	5.60324e+06	7.07581e+06	3.65413e+06
P20042	IF2B_HUMAN	SGDEMIFDPTMSK.2	S[Ph]GDEMIFDPTMSK	149647	153344	207969	185914	97591.8	124507	147035	139352	181977	200662	131445	159704
P20700	LMNB1_HUMAN	AGGPTTPLSPTR.2	AGGPTT[Ph]PLS[Ph]PTR	151660	80951.6	176234	122424	73720	159405	157684	128124	325850	340781	84979.7	240248
P20700	LMNB1_HUMAN	AGGPTTPLSPTR.2	AGGPTTPLS[Ph]PTR	22691	7520.66	50581.4	41872.2	47159.2	20083.6	28740.1	23192	64917	33477.7	40885.9	11340.5
P20700;Q03252	LMNB1_HUMAN;LMNB2_HUMAN	LKLSPSPSSR.2	LKLS[Ph]PS[Ph]PSSR	643955	221983	1.33483e+06	715261	371518	751752	652288	383617	1.27892e+06	1.22081e+06	332784	939196
P20700;Q03252	LMNB1_HUMAN;LMNB2_HUMAN	LSPSPSSR.2	LSPS[Ph]PSSR	9283.68	7063.94	18666.8	22584.4	5370.6	19463.5	10860.3	8485.27	26211	16357.7	9264.98
P20810	ICAL_HUMAN	SLTPAVPVESKPDKPSGK.3	S[Ph]LTPAVPVESKPDKPSGK	16952.5		16020.4	15235.3	9268.31	20664.9	13363.1	2194.68	6697.98	12271.2	7480.29	14776
P21291	CSRP1_HUMAN	GFGFGQGAGALVHSE.2	GFGFGQGAGALVHS[Ph]E	31364.4	26431.6	51849.9	80975.6	24568.6		29076.8	23800.8	54094.6	80944.2	34686
P21333	FLNA_HUMAN	RAPSVANVGSHCDLSLK.3	RAPS[Ph]VANVGSHC[cam]DLSLK	9551.92	76828.3	60169.7	43733.6	18006.9	152941	14939.3	82688.5	65611.6	31546.8	18387.6	169580
P21359	NF1_HUMAN	HGSASQVQK.2	HGS[Ph]ASQVQK	221.797							199.623	305.386
P21359	NF1_HUMAN	KSFDHLISDTK.2	KS[Ph]FDHLISDTK	6.18711		2456.99	4.44205		8.20871	2.18982	6.75552	1852.86
P21359	NF1_HUMAN	KSFDHLISDTK.3	KS[Ph]FDHLISDTK	775.691		3761.87	582.968				241.41	3618.59		196.226
P21359	NF1_HUMAN	SFDHLISDTK.2	S[Ph]FDHLISDTK	10889.1	3940.86	49808.5	13193.2	8491.02		8147.02	3413.89	48232.1	12797	8824.65
P21796	VDAC1_HUMAN	LTFDSSFSPNTGK.2	LTFDSSFS[Ph]PNTGK	11053.4	19140.6	11674	36922.1	33703	18614.1	12899.4		13278.5	25959.6	20403.6
P21796	VDAC1_HUMAN	LTFDSSFSPNTGKK.3	LTFDSSFS[Ph]PNTGKK	1977.87		1070.27	6418.11	1983.56			977.258	326.411	6553.97	3831.36
P22059	OSBP1_HUMAN	MLAESDESGDEESVSQTDK.2	MLAES[Ph]DES[Ph]GDEESVSQTDK	108883	175758	60327.9	95729.8	252103	163221	93092.6	103957	49404.9	102110	115859	212232
P22059	OSBP1_HUMAN	MLAESDESGDEESVSQTDKTELQNTLR.3	MLAES[Ph]DES[Ph]GDEESVSQTDKTELQNTLR	156995	260851	121308	178071	240281	406311	201807	240739	113032	254860	233537	695223
P22087	FBRL_HUMAN	RVSISEGDDKIEYR.3	RVS[Ph]ISEGDDKIEYR	10993	10617	46146.8	16450.6	19424.6		11472.7		37174.1	10398.8	11561.8
P22234	PUR6_HUMAN	EVYELLDSPGK.2	EVYELLDS[Ph]PGK	74326.1	16632.8	49428.2	85722	57377.9	31804.6	70557.6	22607.3	93997.7	129688	55889	24405.8
P22234	PUR6_HUMAN	TKEVYELLDSPGK.2	TKEVYELLDS[Ph]PGK	168255	38113.7	102717	160614	113625	74516.8	176482	53138.1	194875	335086	111115	63047.9
P22234	PUR6_HUMAN	TKEVYELLDSPGK.3	TKEVYELLDS[Ph]PGK	37606.5	7342.35	23415.2	34800.8	17731.6	9704.5	35237.1	10961.7	43171.3	59266	23754
P22314	UBA1_HUMAN	NGSEADIDEGLYSR.2	NGS[Ph]EADIDEGLYSR	16794.8	20674.4	21316.3	36391.3	51190.9	17286.6	25463.1	18881.1	26525.5	42119.6	28491.5	24772.6
P22314	UBA1_HUMAN	RVSGPDPK.2	RVS[Ph]GPDPK	29603.3	21522.9	20516.1	68730.3	82342.5	19847.1	20224.2	17225.5	25937.4	46452.5	64605	10477.8
P22626	ROA2_HUMAN	NMGGPYGGGNYGPGGSGGSGGYGGR.2	NMGGPYGGGNYGPGGSGGS[Ph]GGYGGR	19955.7	22529.2	13336.2	16069.5	4955.69	9258.04	20145.8	10320.1	16288.8	25351.6	7646.75
P22681	CBL_HUMAN	IKPSSSANAIYSLAAR.2	IKPSSS[Ph]ANAIYSLAAR	12679.6	13368	23517.8	18127.6	2106.94		12866.4	7969.33	23541.4	12367.3	2805.29
P22681	CBL_HUMAN	IKPSSSANAIYSLAAR.3	IKPS[Ph]SSANAIYSLAAR	18202.7	15679.3	31587.3	22410	7531.36	8808.52	19268.8	13459.4	28546.6	15295.6	5849.83
P23193	TCEA1_HUMAN	EPAITSQNSPEAR.2	EPAITSQNS[Ph]PEAR	89524.6	100510	59599.3	52476.6	161288	56284.8	83242.9	63313.1	63225.4	42955.3	150173	84885.8
P23193	TCEA1_HUMAN	KKEPAITSQNSPEAR.2	KKEPAITS[Ph]QNSPEAR	377098	543828	222239	231550	442393	263113	318564	253702	219015	318152	429282	271231
P23193	TCEA1_HUMAN	KKEPAITSQNSPEAR.2	KKEPAITSQNS[Ph]PEAR	379172	545619	225075	231838	443674	270262	319138	252711	220844	318754	426764	288511
P23193	TCEA1_HUMAN	KKEPAITSQNSPEAR.3	KKEPAITSQNS[Ph]PEAR	1.06614e+06	866671	676305	548190	920721	696229	918897	746643	640517	703905	1.08865e+06	885617
P23396	RS3_HUMAN	DEILPTTPISEQK.2	DEILPTT[Ph]PISEQK	269387	415131	386240	785564	598543	174656	296941	399313	473244	743426	518278	185130
P23443	KS6B1_HUMAN	FIGSPRTPVSPVK.2	FIGS[Ph]PRT[Ph]PVS[Ph]PVK	2831.66	3718.29	2847.53	843.659		34523.7		3905.76		10081.1	6241.43
P23470	PTPRG_HUMAN	DGEGTEEGEK.1	DGEGT[Ph]EEGEK	62790.3	178094	33596	21722.2	56305.2	130228	89131.6	62405.6	44132.4	37377.9	63673.7	159570
P23497	SP100_HUMAN	LNECISPVANEMNHLPAHSHDLQR.4	LNEC[cam]IS[Ph]PVANEMNHLPAHSHDLQR	58339.1	165114	13434.4	34245.7	27768.8		57761.2	140338	12795.5	46120.7	27348.7
P23497	SP100_HUMAN	LPLQESEEEEREER.3	LPLQES[Ph]EEEEREER	13047	25617.5	9550.64	18776.1	20469.4	3084.85	20084.2	44296.1	10553	11429.7	11331.2
P23528	COF1_HUMAN	ASGVAVSDGVIK.2	[ac]AS[Ph]GVAVSDGVIK	130500	159056	80194	576157	377173	139589	178902	259138	136235	1.10353e+06	592029	260635
P23528	COF1_HUMAN	ASGVAVSDGVIK.2	AS[Ph]GVAVSDGVIK	120722	158721	88610.6	480615	359544	147945	139025	209228	99617.2	692626	411670	248690
P23528	COF1_HUMAN	KSSTPEEVK.2	KSST[Ph]PEEVK	6380.21		5982.56	12075	6952.7		4787.09	5029.39	7150.41	8799.43	8853.26
P23588	IF4B_HUMAN	EEDCHSPTSKPPKPDQPLK.4	EEDC[cam]HS[Ph]PTSKPPKPDQPLK	6692.72	6004.12	18181.5	13075.5	5033.47	11933.5	5363.54	9742.2	16182.9	9133.39	4781.23	8791.52
P23588	IF4B_HUMAN	ERHPSWR.2	ERHPS[Ph]WR	28616.4	19258.5	33347.8	27012.1	81005.1	54373.1	29586.3	28950.9	30862	25040.3	37152.7	25612.8
P23588	IF4B_HUMAN	ERHPSWRSEETQER.3	ERHPS[Ph]WRS[Ph]EETQER	6715.97	4254.22	5336.37	7788.18	7413.28	58732.8		4233.65	2601.68	4898.34	5977.24
P23588	IF4B_HUMAN	SQSSDTEQQSPTSGGGK.2	SQSS[Ph]DTEQQSPTSGGGK	21473.6	51544.5	22102.8	23834	24785.1	11090.2	24368.5	32139.9	25941.8	29151.4	37347	29183.2
P23588	IF4B_HUMAN	SQSSDTEQQSPTSGGGK.2	SQSSDTEQQS[Ph]PTSGGGK	9564.6	30833.3	5245.28	25204.8	15266.7		9319.23	9070.03	15915.8	10772.2	24398.4	17734.1
P23588	IF4B_HUMAN	TGSESSQTGTSTTSSR.2	TGS[Ph]ESS[Ph]QTGTSTTSSR	11682.3	7926.92	10829.1	20020.8	5010.64	18955.2	3778.18		1236.76	6741.15	2586.62	4125.75
P23588	IF4B_HUMAN	TGSESSQTGTSTTSSR.2	TGS[Ph]ESSQTGTSTTSSR	45860.7	48088	28779.1	50729.4	12289.3	20042.2	18065	7619.05	18786	9855.19	32191.4	8917.44
P24534	EF1B_HUMAN	DDDDIDLFGSDDEEESEEAK.2	DDDDIDLFGS[Ph]DDEEESEEAK	193532	379810	270335	457704	684263	201405	162199	325473	254400	449728	419470	274200
P24534	EF1B_HUMAN	DDDDIDLFGSDDEEESEEAKR.3	DDDDIDLFGS[Ph]DDEEESEEAKR	730856	1.13508e+06	1.28047e+06	1.2638e+06	1.76068e+06	1.31378e+06	606991	849909	1.14135e+06	1.3424e+06	1.47945e+06	1.65335e+06
P24928	RPB1_HUMAN	YSPTSPK.2	YS[Ph]PTSPK	23950.9	19034	6453.15	23841.9	42027.2	3439.5		25327	23614.5	3623.46	17159.8	36335.7
P24928	RPB1_HUMAN	YSPTSPK.2	YSPTS[Ph]PK	1755.85			3215.77	1268.45		1720.63	2038.44	3450.3	1669.13	1065.48
P24928	RPB1_HUMAN	YSPTSPTYSPTSPK.2	YS[Ph]PTSPTYS[Ph]PTSPK	40450.7	46191.6	42818.5	19789.2	52881.4	62994	35048.1	39868.5	29907.5	25961.5	21880.4	54719.1
P24928	RPB1_HUMAN	YSPTSPTYSPTSPK.2	YSPT[Ph]SPTYS[Ph]PTSPK	33445.3	44577	36237.1	19576	50335.4	60744.6	34316.9	37427.8	27088.2	23251.1	21744.7	56433.2
P24928	RPB1_HUMAN	YSPTSPTYSPTSPK.2	YSPT[Ph]SPTYSPTSPK	22578.5	17039.9	20429.9	16732.9	34081.9	16918.3	24053.4	23992.3	23042	17096	10069.7	20959.2
P24928	RPB1_HUMAN	YSPTSPTYSPTSPK.2	YSPTS[Ph]PTYS[Ph]PTSPK	41154.8	57628.8	46436.8	25004	63830.9	75909.2	43533.7	47356.8	35320.7	31030.1	27626.8	72588
P24928	RPB1_HUMAN	YSPTSPTYSPTSPK.2	YSPTS[Ph]PTYSPT[Ph]SPK	72901.6	70586.7	67836.1	35053.3	69331.6	77763.6	65052.3	66578.1	52587.3	59783.1	45694.7	116635
P24928	RPB1_HUMAN	YSPTSPTYSPTSPK.2	YSPTS[Ph]PTYSPTS[Ph]PK	68061.9	71190	64382.7	34250.3	68532.6	75501.8	63806.7	65226.7	51371.9	57769.4	45351.9	111932
P24928	RPB1_HUMAN	YSPTSPTYSPTSPK.2	YSPTS[Ph]PTYSPTSPK	41931.8	34249.1	37437	29956.7	63010.1	32172.5	44067.6	45124.8	43485.6	30140	37870.5	32292.2
P24928	RPB1_HUMAN	YSPTSPTYSPTSPK.2	YSPTSPTYSPT[Ph]SPK	24887.1	21402.4	22318.5	19959.4	48778.1	20114.2	21142.4	21698.3	18910.7	18942.3	21832.4	11369.4
P24928	RPB1_HUMAN	YSPTSPTYSPTSPK.2	YSPTSPTYSPTS[Ph]PK	26725.9	23612	24169.3	22350.1	54801.9	21389.1	23661	24285.5	20631.4	19269.3	24442	14285.5
P24928	RPB1_HUMAN	YSPTSPTYSPTTPK.2	YSPTS[Ph]PTYS[Ph]PTTPK	22370.5	16820.8	21099.8	13296	27083.3	26555.1	19852.7	17552.2	16372.5	13773.2	12623.6	21470.4
P24928	RPB1_HUMAN	YSPTSPTYSPTTPK.2	YSPTS[Ph]PTYSPTTPK	9454	8572.25	8947.21	8054.97	12001.1	8368.09	10405.7	8745.3	11685.9	4835.17	8546.1	7592.06
P25098	ARBK1_HUMAN	NKPRSPVVELSK.2	NKPRS[Ph]PVVELSK	14163.3		5227.68	18564.8	7268.77		13361.6	5342.21	3851	18022	4192.13
P25098	ARBK1_HUMAN	NKPRSPVVELSK.3	NKPRS[Ph]PVVELSK	23634.1	9125.87	25610.5	50776.8	7422.56	14379.4	30123.3	15536.7	28206.4	32474.4	7518.07	9947.7
P25098	ARBK1_HUMAN	SPVVELSK.2	S[Ph]PVVELSK	14072.1	4188.4	9001.39	24226.6	6850.62	7439.01	10320.8	5707.75	9085.2	23305	5523.2	12033
P25440	BRD2_HUMAN	KADTTTPTPTAILAPGSPASPPGSLEPK.3	KADTTTPTPTAILAPGS[Ph]PAS[Ph]PPGSLEPK	155859	90592.1	216259	304030	57056.7	373935	191584	89532	193557	434598	106344	591497
P25440	BRD2_HUMAN	TAPPALPTGYDSEEEEESRPMSYDEK.3	TAPPALPT[Ph]GYDSEEEEESRPMSYDEK	12766.9	3274.97	11956.2	18411.7	19906	10959.1	13242.9	11151.2	13033	17034.1	10637.8	12120
P25490	TYY1_HUMAN	EEVVGGDDSDGLR.2	EEVVGGDDS[Ph]DGLR	33776.8	31484.1	39547.3	23979.7	48337.9	29695	38829.2	33847.5	41315.5	14282.4	31462.3	39271.3
P25788	PSA3_HUMAN	ESLKEEDESDDDNM.2	ESLKEEDES[Ph]DDDNM	508505	1.47368e+06	693972	508926	1.40874e+06	1.40734e+06	509352	796856	482896	826205	983287	1.41168e+06
P26358	DNMT1_HUMAN	EADDDEEVDDNIPEMPSPK.2	EADDDEEVDDNIPEMPS[Ph]PK	634005	555127	1.08039e+06	764794	498913	507535	749758	597505	1.06988e+06	850328	305738	550272
P26358	DNMT1_HUMAN	RVGMADANSPPKPLSK.3	RVGMADANS[Ph]PPKPLSK	20895.4	4506.71	39067.7	23810	5110.19	3482.98	9866.67	4208.99	35975.2	10014.9	8018.82
P26358	DNMT1_HUMAN	SKSDGEAKPEPSPSPR.3	SKS[Ph]DGEAKPEPSPSPR	7255.59	4375.08	5486.35	4248.29		14929.3	6872.1			4252.03	3991.46	4136.69
P26358	DNMT1_HUMAN	VGMADANSPPKPLSKPR.3	VGMADANS[Ph]PPKPLSKPR	23037.3	3996.46	43445.9	40224.9	7173.97	5150.79	23033.1	12575	53521.9	31669.4	14165.4
P26368	U2AF2_HUMAN	EEHGGLIRSPR.2	EEHGGLIRS[Ph]PR	203836	214770	250399	290322	497690		180675	267765	249227	193013	403025
P26368	U2AF2_HUMAN	EEHGGLIRSPR.3	EEHGGLIRS[Ph]PR	82126.7	35875.9	160131	154586	91989.5		116691	115966	168555	72376.2	92590.6
P26368	U2AF2_HUMAN	GAKEEHGGLIRSPR.2	GAKEEHGGLIRS[Ph]PR	2655.93		4688.38	10674.2	9.43464		13515.7	13154.4	7706.68	18420.7	16879.9
P26368	U2AF2_HUMAN	GAKEEHGGLIRSPR.3	GAKEEHGGLIRS[Ph]PR	79074.7		111425	146760			220371	162145	119110	166912	109257
P26368	U2AF2_HUMAN	SDFDEFER.2	[ac]S[Ph]DFDEFER	1.53245e+06	1.63774e+06	1.46322e+06	832396	2.09092e+06	2.66983e+06	1.29179e+06	1.4652e+06	1.24705e+06	863763	1.59317e+06	1.70023e+06
P26368	U2AF2_HUMAN	SDFDEFER.2	S[Ph]DFDEFER	109586	93484.1	103202	60961.8	137846	145142	124215	76151.6	88510.3	69196.6	76183.4	192156
P26373	RL13_HUMAN	KGDSSAEELK.2	KGDS[Ph]SAEELK	1556.74		1986.62	950.632	1225.86	3453.06	1395.09	1767.6	2653.92	2710.95	2260.96
P26373	RL13_HUMAN	KGDSSAEELK.2	KGDSS[Ph]AEELK	2011.29		3703.88	1716.08	1995.05	6226.98	1622.09	2097.58	3929.41	2987.12	3109.51
P27448	MARK3_HUMAN	GIAPASPMLGNASNPNK.2	GIAPAS[Ph]PMLGNASNPNK	8825.44	10002.8		14882.5	10947.6		10456.1	11525.2	4253.9	11490	18947.8
P27448	MARK3_HUMAN	RYSDHAGPAIPSVVAYPK.3	RYS[Ph]DHAGPAIPSVVAYPK	61906.9	44909.3	84189.7	31216	53797.6	30593.8	49049.1	51151.6	91692.7	23110.8	51324.7	27868.4
P27707	DCK_HUMAN	WCNVQSTQDEFEELTMSQK.3	WC[cam]NVQSTQDEFEELTMS[Ph]QK	51559.4	9151.8	27993.1	6019.13		20890.4	36728.7	15163.4	23042.3	4984.32	3727.32	21190.4
P27708	PYR1_HUMAN	ASDPGLPAEEPK.2	AS[Ph]DPGLPAEEPK	176485	208607	274930	373753	543779	245362	110005	119945	164833	134647	271392	151798
P27708	PYR1_HUMAN	IHRASDPGLPAEEPK.2	IHRAS[Ph]DPGLPAEEPK	151758	129293	118939	236896	252863	78014.9	85639.8	84259.9	99718	110168	150653	38574.4
P27708	PYR1_HUMAN	IHRASDPGLPAEEPK.3	IHRAS[Ph]DPGLPAEEPK	213737	147446	229104	363858	364636	192012	158378	146153	187311	160439	199176	87334.4
P27708	PYR1_HUMAN	IHRASDPGLPAEEPKEK.3	IHRAS[Ph]DPGLPAEEPKEK	9385.49	10517	6619.5	23632.7	9601.29		13413.7	13157.7	3185.9	14455.2	21648.6
P27708	PYR1_HUMAN	IHRASDPGLPAEEPKEK.4	IHRAS[Ph]DPGLPAEEPKEK	2413.75		3075.46	11722.2			4165.79	2779.19		4536.4	2580.17
P27708	PYR1_HUMAN	RLSSFVTK.2	RLS[Ph]SFVTK	15574.6	1336.45	28746.7	24651.8	33468.1	6626.92	12305.7	3135.06	26026.9	14620.6	34057.4	9377.5
P27816	MAP4_HUMAN	ASPIKMDLAPSK.2	AS[Ph]PIKMDLAPSK	22758.8	14999.1	40251.1	18099.6	7177.7	13637.2	27362.6	18532.7	37420.1	24941.4	19664.4	21419
P27816	MAP4_HUMAN	ASPSKPASAPASR.2	AS[Ph]PSKPASAPASR	18560.6		41168.4	25129.9	17890.6	18833.1	16968.1	13442.8	55539.5	22826.3	19483.8	9507.81
P27816	MAP4_HUMAN	DMESPTKLDVTLAK.2	DM[ox]ES[Ph]PTKLDVTLAK	34538.6	44094.7	120019	51562.6	119881	33429.2	38106.9	31921.8	95577.5	40302.7	45365.5	21765.6
P27816	MAP4_HUMAN	DMESPTKLDVTLAK.2	DMES[Ph]PTKLDVTLAK	390029	379189	971144	421568	455723	375647	420591	462238	747895	336875	577009	184879
P27816	MAP4_HUMAN	DMESPTKLDVTLAK.3	DM[ox]ES[Ph]PTKLDVTLAK	14438	25128.9	50526.3	17051.1	37222.7	21793	15132.4	18759.1	39236.2	11983.9	22111.7	26739.9
P27816	MAP4_HUMAN	DMESPTKLDVTLAK.3	DMES[Ph]PTKLDVTLAK	49909.2	77022.1	137516	57780.8	66499.1	67116.5	54211.1	82007.4	95940.1	38777.3	91274.8	34435.8
P27816	MAP4_HUMAN	DMSPLSETEMALGK.2	DMS[Ph]PLSETEMALGK	15521.8	21777	41076.7	35172	20234	12674.5	13297.8	22737.6	50719.1	26428.9	29333.6	10986.5
P27816	MAP4_HUMAN	DVTPPPETEVVLIK.2	DVT[Ph]PPPETEVVLIK	307186	222234	319399	188474	579646	235287	278022	196112	392369	136940	460071	199434
P27816	MAP4_HUMAN	DVTPPPETEVVLIK.3	DVT[Ph]PPPETEVVLIK	27737.9	16981.9	24110.9	13519.4	45241.2	16482.5	21724.7	15695.8	29473.7	5380.52	35485.9	7258.39
P27816	MAP4_HUMAN	ELPPSPEKK.2	ELPPS[Ph]PEKK	13685.1		6121.29	1049.97	9968.21		11178.1	10648	16631.6	2666.95	10038.1
P27816	MAP4_HUMAN	ETERASPIK.2	ETERAS[Ph]PIK	15556.6	13545.8	36236	22850.7	32148.2	12154.3	13329.2	10167.2	40928	15781	30853.3	6883.03
P27816	MAP4_HUMAN	ETERASPIKMDLAPSK.2	ETERAS[Ph]PIKMDLAPSK	18812	11940.5	21592.9	18210.7	29869.8	7339.84	23186.7	20083.3	25805.4	24553.1	23919	14363
P27816	MAP4_HUMAN	ETERASPIKMDLAPSK.3	ETERAS[Ph]PIKMDLAPSK	76949.2	53820.1	115384	77678.3	48690.7	35829.3	94749.2	68784.4	111879	90380.5	113483	41028
P27816	MAP4_HUMAN	KCSLPAEEDSVLEK.2	KC[cam]S[Ph]LPAEEDSVLEK	53583.8	19409	150033	36040.1	90475.3	37854.4	56271.1	22716.7	176157	38976.9	82327.1	42166.6
P27816	MAP4_HUMAN	KCSLPAEEDSVLEK.3	KC[cam]S[Ph]LPAEEDSVLEK	19863.6	6976.1	55256.5	12008.5	27701.7	19142.5	20669.8	10370.1	56849.3	11210.7	33489.5
P27816	MAP4_HUMAN	LATNTSAPDLK.2	LATNTS[Ph]APDLK	12484.3	16811	80417.9	17518.3	52363.1	41175.7	9296.63	14143.7	47651.7	8756.21	32678	18446.3
P27816	MAP4_HUMAN	RASPSKPASAPASR.3	RAS[Ph]PSKPASAPASR	43238.6	20432.6	61098.7	73057.6	31868	29985.7	45799.3	31084.9	105735	34734.1	55579.9	24301.2
P27816	MAP4_HUMAN	SPSTLLPK.1	S[Ph]PSTLLPK	37325.9	20522.1	62589.7	40196.3	29187.5	33613.4	34498.7	17851.5	85684.8	67015.8	34796.7	40286.9
P27816	MAP4_HUMAN	SPSTLLPK.2	S[Ph]PSTLLPK	7513.88	4872.37	14100.4	4380.08	7444.06	7732.92	3787.75	1161.08	18420.2	3819.95	5555.41	4819.22
P27816	MAP4_HUMAN	SPSTLLPK.2	SPS[Ph]TLLPK	7506.68	4925.68	14134.7	4604.19	6591.5	7851.09	3956.33		17462.9	3365.46	5196.73	6800.39
P27816	MAP4_HUMAN	VGSLDNVGHLPAGGAVK.2	VGS[Ph]LDNVGHLPAGGAVK	38011.1	27267.4	35060.8	21804.9	30269.2		38037.2	27576.9	50476	30422.7	33251.1
P27816	MAP4_HUMAN	VGSLDNVGHLPAGGAVK.3	VGS[Ph]LDNVGHLPAGGAVK	9635.34	9711.33	6674.31	6739.22	11244		14751.7	13567.3	11027.2	5371.15	15358.3
P27816	MAP4_HUMAN	VGSTENIK.2	VGS[Ph]TENIK	2492.99	1027.73			1894.92				3158.66	1090.01	1681.49	993.565
P27824	CALX_HUMAN	AEEDEILNRSPR.2	AEEDEILNRS[Ph]PR	423638	572557	303862	580941	580526	380103	456171	636436	446067	624403	513752	394762
P27824	CALX_HUMAN	AEEDEILNRSPR.3	AEEDEILNRS[Ph]PR	399241	346794	262380	518529	484949	318909	430765	563660	375369	527236	430859	338633
P27824	CALX_HUMAN	SDAEEDGGTVSQEEEDR.2	SDAEEDGGTVS[Ph]QEEEDR	7025.54	17835.8	9748.56	6311.13	20986.2	11041.3	5974.61	10351.6	8896.72	5829.58	14420.5	8186.77
P27824	CALX_HUMAN	SDAEEDGGTVSQEEEDRKPK.3	SDAEEDGGTVS[Ph]QEEEDRKPK	32561.6	52480.5	15036.7	10204.4	41416.7	23887.6	22546.4	34789.5	15136.5	14534.1	27483.3	18898.4
P28066	PSA5_HUMAN	GVNTFSPEGR.2	GVNTFS[Ph]PEGR				11771.4	3171.48		862.052		3862.45	14268.1	1624.45
P28290	SSFA2_HUMAN	SQSLPTTLLSPVR.2	SQS[Ph]LPTTLLSPVR	59827.7	4389.92	56262	73267.2	20940.1	4743.45	52001.4	5074.68	57281.8	57380.9	21816.8	3741.98
P28482	MK01_HUMAN	VADPDHDHTGFLTEYVATR.3	VADPDHDHTGFLTEY[Ph]VATR	3331.34		17583.6		16959.4	53371.4	3254.02	1931.27	17972.9		13242.3
P28715	ERCC5_HUMAN	FDSSLLSSDDETK.2	FDSSLLS[Ph]S[Ph]DDETK	21419.9	22045.8	9395.69	39318.1	20306.9	64014	22619.2	26724.6	7899.13	45556.5	32799.7	99953.7
P28715	ERCC5_HUMAN	FDSSLLSSDDETK.2	FDSSLLSS[Ph]DDETK	7704.76	11479	4978.27	9761.64	28758.1	19432.3	6408.88	11840.8	2566.59	7408.91	18624.9	14077.9
P28715	ERCC5_HUMAN	LKTEKEPDATPPSPR.3	LKTEKEPDATPPS[Ph]PR	17434.7	16475	9453.41	24341.8	42815.4		10952.2	17740.2	6054.51	20340.4	37942
P28715	ERCC5_HUMAN	NAPAAVDEGSISPR.2	NAPAAVDEGS[Ph]IS[Ph]PR	1021.61	5452.76	828.06	5248.81	16038	4822.47	2860.36	6271.58		7008.43	17349.2	17411.8
P28715	ERCC5_HUMAN	NAPAAVDEGSISPR.2	NAPAAVDEGS[Ph]ISPR	79798.5	101448	44501.7	111447	263751	135357	71342.5	91061.6	35193	102502	177200	110249
P28715	ERCC5_HUMAN	NAPAAVDEGSISPR.2	NAPAAVDEGSIS[Ph]PR	130160	149568	68149.4	160283	359184	186479	105027	134122	53768.5	146274	251296	179786
P28749	RBL1_HUMAN	DMQPLSPISVHER.2	DMQPLS[Ph]PISVHER	9507.62	8139.35	6923.1	3081.73	1918.92	7993.13	8623.73	11183.9	10112.5	1552.16	4967.84
P28749	RBL1_HUMAN	VIAIDSDAESPAKR.2	VIAIDS[Ph]DAES[Ph]PAKR	3731.58		1773.02	2241.27		4492.35	5001.23	2500.99	3944.32	2773.09	2974.05	7423.21
P29350	PTN6_HUMAN	HKEDVYENLHTK.3	HKEDVY[Ph]ENLHTK		1794.01
P29350	PTN6_HUMAN	SKGSLKR.2	SKGS[Ph]LKR		6101.43		546.605				3935.47			1994.96
P29350	PTN6_HUMAN	TSSKHKEDVYENLHTK.2	T[Ph]SSKHKEDVYENLHTK	1576.44	33301.9	2714.31					2487.47			2048.21
P29350	PTN6_HUMAN	TSSKHKEDVYENLHTK.3	T[Ph]SSKHKEDVYENLHTK	2413.21	167433	25642					59084.5	18119.9		3410.26	6252.87
P29350	PTN6_HUMAN	TSSKHKEDVYENLHTK.3	TSS[Ph]KHKEDVYENLHTK	2569.89	201841	30947.1					196076	24197.1		4568.11
P29350	PTN6_HUMAN	TSSKHKEDVYENLHTK.4	TS[Ph]SKHKEDVYENLHTK	1344.36	71153.8	26040.2	22903.3				155354	17682	16451.8	39117.2
P29350	PTN6_HUMAN	TSSKHKEDVYENLHTK.4	TSS[Ph]KHKEDVYENLHTK	1794.69	90651.9	30900.4	6802.45		33228.1		27185.5	21515.6		17230.4
P29374	ARI4A_HUMAN	ILGQSSPEKK.2	ILGQS[Ph]SPEKK	9186.68	35786.5	6316.96	4665.27	6228.37		6827.87	10196.7	5837.19	3187.92	8255.6
P29375	KDM5A_HUMAN	VVSSVSSSPR.2	VVSSVS[Ph]SSPR	5575.28	6073.9	2440.9	3418.86	7623.38		1881.32	7262.55			5936.43
P29375	KDM5A_HUMAN	VVSSVSSSPR.2	VVSSVSS[Ph]SPR	4695.52	4081.53	1733.09	1976.25	6020.19	1378.37	1252.45	4900.19			4519.01
P29590	PML_HUMAN	AVSPPHLDGPPSPR.2	AVS[Ph]PPHLDGPPS[Ph]PR	86701.3	146760	113472	204598	375174	54293.4	110120	155889	105830	185135	264839	98672.2
P29590	PML_HUMAN	AVSPPHLDGPPSPR.3	AVS[Ph]PPHLDGPPS[Ph]PR	11317.2	30403.7	5930.61	20276.4	48394.4	9963.87	10557.9	30740.3	10643.2	20590.3	21124.5	8205.98
P29590	PML_HUMAN	KASPEAASTPR.2	KAS[Ph]PEAASTPR	6237.95	10514	7024.64	22320.7	14544.1		7727.78	12602	8229.23	18985	19223.6
P29590	PML_HUMAN	SPVIGSEVFLPNSNHVASGAGEAEER.3	S[Ph]PVIGSEVFLPNSNHVASGAGEAEER	6676.03	26338.5	13852.6	27950	47639.8	10640.2	8548	24605.1	14456.3	20137.6	36663
P29590	PML_HUMAN	SSPEQPRPSTSK.2	SS[Ph]PEQPRPSTSK	25412	74590	31943.7	57050	69170.5	20395.5	26700.1	37938.5	34530.2	65100.8	81988.2	26265.4
P29590	PML_HUMAN	SSPEQPRPSTSK.3	S[Ph]SPEQPRPSTSK				13952	6848.58	2734.85			2834.14	7420.48	11652.3
P29692	EF1D_HUMAN	ATAPQTQHVSPMR.2	ATAPQTQHVS[Ph]PM[ox]R	20368.4	32321.5	37596.1	45375	67052.2	10505.8	19286.6	24252.3	44627	31517.8	17785.4	15951.7
P29692	EF1D_HUMAN	ATAPQTQHVSPMR.2	ATAPQTQHVS[Ph]PMR	426379	455492	562588	1.19143e+06	249305	376405	434900	482564	692912	780614	363111	389114
P29692	EF1D_HUMAN	ATAPQTQHVSPMR.3	ATAPQT[Ph]QHVSPM[ox]R	8109.43	9596.82	13754.2	18892	7700.19	4995.85	5834.5	9727.12	16905.3	10990.6	5072.27	7823.82
P29692	EF1D_HUMAN	ATAPQTQHVSPMR.3	ATAPQTQHVS[Ph]PM[ox]R	9506.5	11045.7	16431.6	23179.9	9947.03	5379.26	7000.65	11240.9	20043.3	13281.7	5586.64	8773.78
P29692	EF1D_HUMAN	ATAPQTQHVSPMR.3	ATAPQTQHVS[Ph]PMR	144671	62424.4	300453	539856	58113.1	168295	184885	147454	370162	232408	66837.6	145156
P29692	EF1D_HUMAN	KPATPAEDDEDDDIDLFGSDNEEEDK.3	KPATPAEDDEDDDIDLFGS[Ph]DNEEEDK	54518.3	62892.2	78129.6	56183.5	38986.2	70271.2	44132.4	46290.9	61608.3	45933.8	17899.5
P29692	EF1D_HUMAN	KPATPAEDDEDDDIDLFGSDNEEEDKEAAQLR.3	KPATPAEDDEDDDIDLFGS[Ph]DNEEEDKEAAQLR	492268	665807	768813	843885	361021	532263	470205	597627	507483	683718	221481	471649
P29692	EF1D_HUMAN	KPATPAEDDEDDDIDLFGSDNEEEDKEAAQLR.4	KPATPAEDDEDDDIDLFGS[Ph]DNEEEDKEAAQLR	5.25376e+06	7.51672e+06	7.67843e+06	8.87832e+06	3.50951e+06	6.06651e+06	5.24734e+06	6.49904e+06	5.53678e+06	8.36199e+06	2.39978e+06	5.95591e+06
P29692	EF1D_HUMAN	KPATPAEDDEDDDIDLFGSDNEEEDKEAAQLR.5	KPATPAEDDEDDDIDLFGS[Ph]DNEEEDKEAAQLR	501847	482921	481148	667590	93462.3	367107	358209	421062	348032	528651	124729	345866
P29803;P08559	ODPAT_HUMAN;ODPA_HUMAN	YHGHSMSDPGVSYR.2	YHGHS[Ph]MSDPGVS[Ph]YR	392367	182434	84663.4	110207	404255	310203	362678	204805	118454	208855	490345	376304
P29803;P08559	ODPAT_HUMAN;ODPA_HUMAN	YHGHSMSDPGVSYR.2	YHGHS[Ph]MSDPGVSYR	123331	116172	63869.5	129969	399070	86407.9	80017.1	122451	77799.8	119004	402185	69529.4
P29803;P08559	ODPAT_HUMAN;ODPA_HUMAN	YHGHSMSDPGVSYR.2	YHGHSMSDPGVS[Ph]YR				4935.4	12323.5	8157.75	3941.49	5415.17		5634.49	9166.16
P29803;P08559	ODPAT_HUMAN;ODPA_HUMAN	YHGHSMSDPGVSYR.3	YHGHS[Ph]M[ox]SDPGVS[Ph]YR	22166.4	11735	7289.79	6734.99	131044	21232.8	17785.9	11143.7	6111.2	10658.2	28385.1	28198.3
P29803;P08559	ODPAT_HUMAN;ODPA_HUMAN	YHGHSMSDPGVSYR.3	YHGHS[Ph]M[ox]SDPGVSYR	17918.8	20712	16479.2	13910.1	123486		16605	18661.2	14213.5	12731.8	42710.6	14282.2
P29803;P08559	ODPAT_HUMAN;ODPA_HUMAN	YHGHSMSDPGVSYR.3	YHGHS[Ph]MSDPGVS[Ph]YR	284695	114101	80554.5	108076	377578	248288	340486	184862	118192	165693	359726	438243
P29803;P08559	ODPAT_HUMAN;ODPA_HUMAN	YHGHSMSDPGVSYR.3	YHGHS[Ph]MSDPGVSYR	185738	164287	126205	240317	517612	192513	164991	250558	150101	191916	550142	186662
P29803;P08559	ODPAT_HUMAN;ODPA_HUMAN	YHGHSMSDPGVSYR.3	YHGHSMSDPGVS[Ph]YR	13794.3	8484.37	8813.05	14755	27071.2	12182.6	14783.2	19917.2	14092.5	19533.4	23852.1	14020.7
P29966	MARCS_HUMAN	AEDGATPSPSNETPK.2	AEDGATPS[Ph]PSNETPK		153347		15574.9	142258	40591.1		65163.4		11193	127468	45961.5
P29966	MARCS_HUMAN	AEDGATPSPSNETPK.2	AEDGATPSPS[Ph]NETPK		178407		18241.1	163106	47815.7		75117.1		12936	145949	53059.9
P29966	MARCS_HUMAN	AEDGATPSPSNETPK.2	AEDGATPSPSNET[Ph]PK	5518.6	179892		19617.3	169606	50292.8		78014.2		15650.3	155188	58167.2
P29966	MARCS_HUMAN	AEDGATPSPSNETPKK.3	AEDGATPSPSNET[Ph]PKK		4129.37			5624.12	1220.37		2419.43			4413.81
P29966	MARCS_HUMAN	EAPAEGEAAEPGSPTAAEGEAASAASSTSSPK.3	EAPAEGEAAEPGS[Ph]PTAAEGEAASAASSTSSPK		268943		46446.5	212753	147540		155089		35946.7	96883.9	32329.7
P29966	MARCS_HUMAN	GEAAAERPGEAAVASSPSK.2	GEAAAERPGEAAVASS[Ph]PSK		201823		66619.5	158115	67519.8		143944	5534.81	70054.6	210038	49999.5
P29966	MARCS_HUMAN	GEAAAERPGEAAVASSPSK.3	GEAAAERPGEAAVAS[Ph]SPSK		114125		38624.7	140902	47501.2	3211.36	74457.3		30246.7	121921	32344.6
P29966	MARCS_HUMAN	GEAAAERPGEAAVASSPSK.3	GEAAAERPGEAAVASS[Ph]PSK		188695		65703	243209	96871	14604.2	128939		52583.8	213504	65787.3
P29966	MARCS_HUMAN	GEPAAAAAPEAGASPVEK.2	GEPAAAAAPEAGAS[Ph]PVEK		116365		11680.4	56318.8	30347.2		59256.2		14873.1	42379.5
P29966	MARCS_HUMAN	KRFSFK.2	KRFS[Ph]FK		7658.95		53.2658		74200.9		8705.96			7712.86	56484.6
P29966	MARCS_HUMAN	LSGFSFK.1	LSGFS[Ph]FK		50864.3		6906.32	39784.8	11089.6		37525.4	2153.9	3994.28	24516.1	7225.77
P29966	MARCS_HUMAN	LSGFSFK.2	LSGFS[Ph]FK		61698.3		6955.35	54552.3	10601.5	2.74462	47263.2		3083.92	24781.9	7086.28
P29966	MARCS_HUMAN	LSGFSFKK.2	LSGFS[Ph]FKK		381297		57876.2	192288	112820		429808		53567.5	307069	120446
P29966	MARCS_HUMAN	RFSFKK.2	RFS[Ph]FKK		158289	4585.3	1050.28	174130	118532		147953	4991.64	11747.8	24517.7	71655.6
P30050	RL12_HUMAN	IGPLGLSPK.2	IGPLGLS[Ph]PK	15093.9	21116.1	56360.3	61973.3	54318.8		7352.74	27562.3	42133.7	26968.2	49534.6
P30086	PEBP1_HUMAN	NRPTSISWDGLDSGK.2	NRPT[Ph]SISWDGLDSGK	657.465	11787	66473.2	3512.29	6635.06	5164.82	1234.43	14350.8	63683.3	2243.67	9518.73
P30086	PEBP1_HUMAN	NRPTSISWDGLDSGK.3	NRPT[Ph]SISWDGLDSGK		5329.86	28745.9	1747.68	2731.16			8417.16	28398		3879.67
P30307	MPIP3_HUMAN	STELFSSTR.2	STELFS[Ph]STR	8451.2	112844	9504.9	3349.71		28017.9	19810.5	34544.9	3480.42	8297.85	2013.59	178273
P30307	MPIP3_HUMAN	STELFSSTR.2	STELFSST[Ph]R	8833.47	67497.8	11704.8	2190.08		37114.7	15512.2	26940.4	10502.2	11752.2		213589
P30414	NKTR_HUMAN	AYRPPSGEK.2	AYRPPS[Ph]GEK	1819.43				3963.4			1632.15	1180.65		3060.56
P30414	NKTR_HUMAN	ILIPSDIESSK.2	ILIPS[Ph]DIESSK	13711.3	13418.4	13708.9	35210.7	44700.9	7317.29	16648.6	16357.8	19970.7	26701.4	52665.4	10784.8
P30419	NMT1_HUMAN	GGLSPANDTGAK.2	GGLS[Ph]PANDTGAK	80840.4	59267.2	110888	122057	129525	66409.8	71273.5	70591.7	107847	130030	106056	58780.9
P30566	PUR8_HUMAN	AAGGDHGSPDSYR.2	[ac]AAGGDHGS[Ph]PDSYR	8182.26	8231.84	6630.95	5980.76	19678.1	5477.81	8479.84	8743.75	6778.55	8381.02	18423.9	6004.32
P30622	CLIP1_HUMAN	TASESISNLSEAGSIK.2	TASESISNLS[Ph]EAGS[Ph]IK	6157.32	8613.94		28200.9	10568.1	21411	13895.5	13176.4		26729.5	11286.5	28119.8
P30622;Q9UDT6	CLIP1_HUMAN;CLIP2_HUMAN	KISGTTALQEALK.2	KIS[Ph]GTTALQEALK	1736.76		2262.76	12886.2	4154.23		2499.42		1811.55	8407.67	3125.5
P31749	AKT1_HUMAN	SGSPSDNSGAEEMEVSLAKPK.3	SGS[Ph]PSDNSGAEEMEVSLAKPK	35114.5	24648.7	28043.5	50261.8	28626.5	26034.1	38430.1	30746.1	30896.5	43346.7	49234	10827.1
P31942	HNRH3_HUMAN	DGMDNQGGYGSVGR.2	DGMDNQGGYGS[Ph]VGR	8796.23		8628.61	12993		5240.18	2520.88		7219.49	19925.8	5734.15
P31943	HNRH1_HUMAN	EGRPSGEAFVELESEDEVK.3	EGRPSGEAFVELES[Ph]EDEVK	17865	22140.7	13385.2	17343.4	33216.6	13886.7	15239.5	22810.6	11502.7	12259.7	27488.3
P31943;P55795	HNRH1_HUMAN;HNRH2_HUMAN	HTGPNSPDTANDGFVR.2	HTGPNS[Ph]PDTANDGFVR	513412	510033	396706	525585	429032	404615	338965	423808	482188	691329	524969	313154
P31943;P55795	HNRH1_HUMAN;HNRH2_HUMAN	HTGPNSPDTANDGFVR.3	HTGPNS[Ph]PDTANDGFVR	401101	348584	365069	468757	546700	508207	337353	413983	426491	470163	444632	385696
P31948	STIP1_HUMAN	HDSPEDVK.2	HDS[Ph]PEDVK	5547.69	1883.65	5707.68	20236	3795.72	3343.83	6757.99	2959.4	7637.03	28189.4	5491.15
P32519	ELF1_HUMAN	TKPPRPDSPATTPNISVK.2	TKPPRPDS[Ph]PATTPNISVK	15892.4	14505.7	16227	17011.2	20910.5		11332.5	16080	26739.6	12118.8	14784.4
P32519	ELF1_HUMAN	TKPPRPDSPATTPNISVK.3	TKPPRPDS[Ph]PATTPNISVK	149731	143596	167177	153282	139647	182547	150673	167471	208190	129492	144291	136341
P32519	ELF1_HUMAN	YADSPGASSPEQPK.2	YADSPGAS[Ph]SPEQPK	8801.83	13360.8	19202.5	9227.78	8238.13	9520.45	5653.03	9598.56	14169.2	7725.85	6575.35	4887.91
P33176	KINH_HUMAN	GHSAQIAKPIRPGQHPAASPTHPSAIR.6	GHSAQIAKPIRPGQHPAAS[Ph]PTHPSAIR	6630.16	10837.7	6154.89	5411.42			11122.6	9870.04	8286.47	13528.7	5757.39
P33176	KINH_HUMAN	PIRPGQHPAASPTHPSAIR.3	PIRPGQHPAAS[Ph]PTHPSAIR	11966.2	20455.8	8236.9	18024.1	99978.7	3908.86	8912.29	10761.3	11993.7	14924	38551
P33176	KINH_HUMAN	PIRPGQHPAASPTHPSAIR.4	PIRPGQHPAAS[Ph]PTHPSAIR	22196.3	15835.6	27188.8	51611.4	46230.1	13648.7	26196.4	30014.1	35824.3	34631.4	37033.3	12961.6
P33241	LSP1_HUMAN	EDSDEVHLEELSLSK.3	EDSDEVHLEELS[Ph]LSK	5641.48	1364.32	8858.36	956.227	1606.01		3629.99	2006.83	9808.77		1473.81
P33241	LSP1_HUMAN	LIDRTESLNR.2	LIDRTES[Ph]LNR	48919.5	23683.5	11882	3648.83	6225.95	14411.7	73505.3	27018.1	8837.5	8024.89	13349.7	17797.7
P33241	LSP1_HUMAN	LIDRTESLNR.3	LIDRTES[Ph]LNR	29069.4	6961.45	13459.6	2699.13	2831.85	14521.2	69303.7	18401.2	9653.77	4205.04	3279.76	17841.8
P33241	LSP1_HUMAN	QASIELPSMAVASTK.2	QAS[Ph]IELPSM[ox]AVASTK	61298.1	80396.2	41832.6	7135.57	36837.3	13612	70456.4	56988.1	35575.9	4328.69	20076.4
P33241	LSP1_HUMAN	QASIELPSMAVASTK.2	QAS[Ph]IELPSMAVASTK	904803	810637	607607	138540	272254	148344	1.04935e+06	688116	551049	120350	367205	155278
P33241	LSP1_HUMAN	QASIELPSMAVASTK.3	QAS[Ph]IELPSMAVASTK	33798.5	29639.4	19155	4094.13	6620.25	2478.14	33138.3	24098.1	16729	2257.4	11517.6
P33241	LSP1_HUMAN	SPEGEQEDRPGLHAYEK.2	S[Ph]PEGEQEDRPGLHAYEK	124489	202673	158212	32305.4	154525	56924.2	97782.2	116681	194376	21840.3	114437	37430.1
P33241	LSP1_HUMAN	SPEGEQEDRPGLHAYEK.3	S[Ph]PEGEQEDRPGLHAYEK	562047	871146	765976	163557	531660	274109	459955	539892	881279	101807	501853	202460
P33241	LSP1_HUMAN	SPEGEQEDRPGLHAYEK.4	S[Ph]PEGEQEDRPGLHAYEK	1099.61	361.04	3187.2				1924.01	1569.26	3692.75		191.311
P33241	LSP1_HUMAN	TESLNR.2	TES[Ph]LNR	16805.1	8483.1	4045.52		6317.03		22007.8	5596.38	10654.9	5638.19	3290.61
P33241	LSP1_HUMAN	TPSPLVLEGTIEQSSPPLSPTTK.3	T[Ph]PS[Ph]PLVLEGTIEQS[Ph]SPPLS[Ph]PTTK	354985	339565	474424	26099.8	217780	252003	246764	255490	115173	106226	261663	391070
P33241	LSP1_HUMAN	TPSPLVLEGTIEQSSPPLSPTTK.3	T[Ph]PS[Ph]PLVLEGTIEQSS[Ph]PPLSPTTK	2.14517e+06	144611	603129	9518.41	54165	39242.2	1.95854e+06	234064	165245	15000.7	132214	735234
P33241	LSP1_HUMAN	TPSPLVLEGTIEQSSPPLSPTTK.3	T[Ph]PS[Ph]PLVLEGTIEQSSPPLSPTTK	461398	86371.5	49753.9	32939.8	176519	19466.6	406793	137190	125862	26357.3	200464	110152
P33241	LSP1_HUMAN	TPSPLVLEGTIEQSSPPLSPTTK.3	TPS[Ph]PLVLEGTIEQSS[Ph]PPLS[Ph]PTTK	748675	828974	996066	191655	531998	572891	606907	633299	686935	167509	649529	573532
P33241	LSP1_HUMAN	TPSPLVLEGTIEQSSPPLSPTTK.3	TPS[Ph]PLVLEGTIEQSS[Ph]PPLSPTTK	2.75716e+06	1.77589e+06	843084	265615	1.20435e+06	379797	3.22592e+06	2.77439e+06	644092	250408	1.62668e+06	949094
P33241	LSP1_HUMAN	TPSPLVLEGTIEQSSPPLSPTTK.3	TPS[Ph]PLVLEGTIEQSSPPLSPTTK	456521	98366.2	132834	40856.5	207417	27973	471820	141951	138110	30660.8	215850	47227.7
P33241	LSP1_HUMAN	TPSPLVLEGTIEQSSPPLSPTTK.3	TPSPLVLEGTIEQSS[Ph]PPLS[Ph]PTTK	1.22618e+06	1.04746e+06	997726	285778	265519	691399	1.25188e+06	677189	553881	374926	432324	549894
P33241	LSP1_HUMAN	TPSPLVLEGTIEQSSPPLSPTTK.3	TPSPLVLEGTIEQSS[Ph]PPLSPTTK	2004776	1.03628e+06	599995	191267	548173	239427	2.28621e+06	793719	431723	182821	1.15053e+06	75856.9
P33527	MRP1_HUMAN	HHNSTAELQK.2	HHNS[Ph]TAELQK	3699.29		2126.31	4691.42			3592.31	2891.69	2053.11	5871.05	5003.48
P33991	MCM4_HUMAN	SGVRGTPVR.2	S[Ph]GVRGT[Ph]PVR	19361.6	20122.2	24026.6	11510.8	6570.51	17157.5	16518.4	15560.1	40777	33511.6	9078.38	15094.6
P33991	MCM4_HUMAN	SSPASTPSR.2	[ac]S[Ph]S[Ph]PASTPSR	1702.74	10360	35988.9		383.86			4262.02	47649.6
P33991	MCM4_HUMAN	SSPASTPSR.2	[ac]S[Ph]SPASTPSR	64263.9	57181.8	66077.8		23521	69121.2	86248.7	97829	120896		40755.9	65619.9
P33991	MCM4_HUMAN	SSPASTPSR.2	[ac]SS[Ph]PASTPSR	47176.1	42558.1	50060.4	13242.6	17717.1	52342.4	64777.5	72807.6	86718.1	29137.1	36211.3	49404.6
P34910	EVI2B_HUMAN	RTSIISLTPWKPSK.3	RTS[Ph]IISLTPWKPSK	18454.3	56810.8	1031.47	3724.97	28091	7913.11	9955.43	46066		1947.13	17051.7	4258.65
P34932	HSP74_HUMAN	AFSDPFVEAEK.2	AFS[Ph]DPFVEAEK	7078.35	1566.07	22536.7	10106.2	24727.8		5903.7	2088.13	22719.8	8683.18	32450.4
P35221	CTNA1_HUMAN	TPEELDDSDFETEDFDVR.2	TPEELDDS[Ph]DFETEDFDVR	12965.9	74501.6	19048.2	46256.8	148898	40050.5	11849.7	56259.6	16119.3	44976.9	84554.6	50241.8
P35251	RFC1_HUMAN	ESVSPEDSEK.2	ESVS[Ph]PEDSEK	17608.3	17280	19513.9	17003.8	25691.3	9683.47	17664.5	17894.5	23129.8	18673.3	21283.1	9276.27
P35251	RFC1_HUMAN	IIYDSDSESEETLQVK.2	IIYDS[Ph]DS[Ph]ESEETLQVK	318995	374993	252779	147102	210317	435698	332565	311240	237119	215678	159583	604150
P35251	RFC1_HUMAN	IIYDSDSESEETLQVK.3	IIYDS[Ph]DS[Ph]ESEETLQVK	19845.6	18890.6	10251.6	5209.4	5344.56	24746.7	14326.7	18078	7945.6	5578.2	10339	32301.8
P35251	RFC1_HUMAN	KISPSKK.2	KIS[Ph]PSKK	10543.6	6137.49	11394.5	5507.74	712.516	6148.96	16524.1	7537.94	9840.48		5928.19
P35251	RFC1_HUMAN	NKPLSPIK.2	NKPLS[Ph]PIK	46815.6	43359.7	66975.2	42255.2	41507.7	39816.6	51089.9	65870.7	79195.7	31513.9	27489.4	29762.6
P35269	T2FA_HUMAN	GNSRPGTPSAEGGSTSSTLR.3	GNS[Ph]RPGT[Ph]PSAEGGSTSSTLR	27784.4	104134	43495.1	16688.5	223862	119871	13097.7	29915.9	29670.4	21088.4	37348.5	150435
P35269	T2FA_HUMAN	KAPTPQEK.2	KAPT[Ph]PQEK	4363.62	3958.06	5850.78	8925.75	8740.67	5360.59	6793	6290.04	6726.73	10240.8	10527.1
P35269	T2FA_HUMAN	LDTGPQSLSGK.2	LDTGPQSLS[Ph]GK	10890.5		5000.39	6204.31	11747.3		20995.5	9813.94	21797.8	28361.5	15925.1	29532.9
P35579	MYH9_HUMAN	GAGDGSDEEVDGK.2	GAGDGS[Ph]DEEVDGK	33764	38006.6	39316.4	17114.3	33524.3	29993.8	29617.1	27967.5	48069.3		30585.1	34058.8
P35579	MYH9_HUMAN	GAGDGSDEEVDGKADGAEAKPAE.2	GAGDGS[Ph]DEEVDGKADGAEAKPAE	20394.1	69517.6	21649.1	6087.72	10904.1	25769.3	18840.2	17431.2	25142.3	16519.5	17894.9	29234.8
P35579	MYH9_HUMAN	GAGDGSDEEVDGKADGAEAKPAE.3	GAGDGS[Ph]DEEVDGKADGAEAKPAE	39313.3	160773	31006.4	12490.6	28076	19320.4	33862.4	30537.4	31869.9	25767.6	29027.4	18606.6
P35579	MYH9_HUMAN	KGAGDGSDEEVDGK.2	KGAGDGS[Ph]DEEVDGK	493728	605549	616538	331847	439636	286088	529000	511411	717099	293511	591890	357303
P35579	MYH9_HUMAN	KGAGDGSDEEVDGK.3	KGAGDGS[Ph]DEEVDGK	53781.1	70691.6	87767.1	27540.6	50780.1	40823.8	66586.4	58861.1	70723.5	27700.2	45642.5	41839.2
P35579	MYH9_HUMAN	KGAGDGSDEEVDGKADGAEAK.3	KGAGDGS[Ph]DEEVDGKADGAEAK	28070.3	35761.9	30484.2	12704.3	27001.2	16799.1	26669.1	30104.3	40858.2	15299.6	27502.8	11178.7
P35606	COPB2_HUMAN	STAQQELDGKPASPTPVIVASHTANK.3	STAQQELDGKPAS[Ph]PTPVIVASHTANK	76592.1	75490.4	65120.8	148133	238519	23529.9	66253.5	64759.5	84999.7	76572.3	118011	20093.8
P35606	COPB2_HUMAN	STAQQELDGKPASPTPVIVASHTANK.4	STAQQELDGKPAS[Ph]PTPVIVASHTANK	109280	106653	93424.3	178860	240670	64667	94112.1	104389	107543	97348.5	137723	67848.8
P35606	COPB2_HUMAN	STAQQELDGKPASPTPVIVASHTANKEEK.3	STAQQELDGKPAS[Ph]PTPVIVASHTANKEEK	146347	152643	134329	287782	420371	109414	137791	154261	175867	238045	168292	127452
P35606	COPB2_HUMAN	STAQQELDGKPASPTPVIVASHTANKEEK.4	STAQQELDGKPAS[Ph]PTPVIVASHTANKEEK	559846	491984	543926	1.00869e+06	821072	310625	547808	521515	600803	785344	640301	230695
P35606	COPB2_HUMAN	STAQQELDGKPASPTPVIVASHTANKEEK.5	STAQQELDGKPAS[Ph]PTPVIVASHTANKEEK	155319	166557	165283	283783	156236	113113	155350	171950	173607	198584	192722
P35611	ADDA_HUMAN	SPGSPVGEGTGSPPK.2	SPGS[Ph]PVGEGTGSPPK	51827.7	301205	63034.6	54080.2	71723	76192.2	45169.1	184799	83066.8	59906.1	77888.6	85676.6
P35611;P35612;Q9UEY8	ADDA_HUMAN;ADDB_HUMAN;ADDG_HUMAN	TPSFLK.1	TPS[Ph]FLK	5464.35	23167.7	26282.6	12115.3	10259.6	16048.1	1872.99	25123.6	29536.4	6163.7	5500.71	16485.8
P35611;P35612;Q9UEY8	ADDA_HUMAN;ADDB_HUMAN;ADDG_HUMAN	TPSFLKK.2	TPS[Ph]FLKK	13874.3	49112.4	70826.1	36127.2	15101.6	44008.3	13098.7	67259.7	70863.8	29714.6	31988.2	47602
P35612	ADDB_HUMAN	KLELDGEKETAPEEPGSPAK.3	KLELDGEKETAPEEPGS[Ph]PAK	6156.84	20306.2		27938.8	15666.5		6460.41	27279.3			1592.01
P35613	BASI_HUMAN	RKPEDVLDDDDAGSAPLK.3	RKPEDVLDDDDAGS[Ph]APLK	6282.91	12375.7	7081.57	21217.2	16378.9	13251.2	9015.5	22204.4	4373.74	25050.8	14464.1	15634.2
P35658	NU214_HUMAN	ITPPAAKPGSPQAK.2	ITPPAAKPGS[Ph]PQAK	112227	84556.4	109648	149552	134560	79854.4	127006	93271.5	131167	115609	183906	71581.3
P35658	NU214_HUMAN	SPGSTPTTPTSSQAPQK.2	S[Ph]PGSTPTTPTSSQAPQK	20812.5	36546.3	22258.4	34434.5	24370.4	11894.6	24311.3	33961.9	26802.2	34999.8	56320.3	18562.9
P35658	NU214_HUMAN	SPGSTPTTPTSSQAPQK.2	SPGS[Ph]TPTT[Ph]PTSSQAPQK	16188.3	48518.2	19221	15576.2	18506.2	30191.5	13957.1	22932.4	19181.4	31359.7	20455.2	29721.1
P35658	NU214_HUMAN	VPAKLSPMK.2	VPAKLS[Ph]PMK	37793.6	7630.99	66151.9	60333.6	54936.1	20115.7	66760	39727.3	115293	44389.3	78987.1	22371
P35659	DEK_HUMAN	SLIVEGK.2	S[Ph]LIVEGK	3019.42	560.567	6123.02	3708.65	4414.33	4265.85	3201.17	2297.37	9411.31	4183.28	1964.21	5048.42
P35749	MYH11_HUMAN	VIENADGSEEETDTR.2	VIENADGS[Ph]EEETDTR			1569.2		15892.4				1230.4		17367.9
P36507	MP2K2_HUMAN	LNQPGTPTR.2	LNQPGT[Ph]PTR	77855.3	38645	36503.2	33009.3	35847.3	35099.6	72992.6	50573.1	43800.9	35299.8	25928.9	25149.6
P36507	MP2K2_HUMAN	PRPPGRPVSGHGMDSR.3	PRPPGRPVS[Ph]GHGMDSR	754.271		21374.9	885.007	3770.45		1746.26	1896.9	41106.2	1240.72	2234.56
P36507	MP2K2_HUMAN	PRPPGRPVSGHGMDSR.4	PRPPGRPVS[Ph]GHGMDSR			57584.2	4956.59	1047.51			5220.55	112088		1692.37
P36578	RL4_HUMAN	ILKSPEIQR.2	ILKS[Ph]PEIQR	2202.11	4871.33	5268.46	23147.1	7706.82	5841.23	4718.22	10013.4	8621.41	17434.1	13587.5
P36915	GNL1_HUMAN	EEQTDTSDGESVTHHIR.3	EEQT[Ph]DTS[Ph]DGESVTHHIR	26357.9	46131.6	4425.49	13668.9	16827.2	20358.3	21731.5	38337	7895.77	24409.3	24529.6	24218.4
P36915	GNL1_HUMAN	EEQTDTSDGESVTHHIR.3	EEQTDTS[Ph]DGESVTHHIR	44455	57335.2	20382.3	27287.9	41134.8	18901.4	43568.5	45117.6	22533.9	21043.4	61313.3	18372.5
P36915	GNL1_HUMAN	REEQTDTSDGESVTHHIR.3	REEQT[Ph]DT[Ph]SDGESVTHHIR	76005.4	117359	42061.7	60014.9	71519.1	49438.9	91070.8	98765.8	41944.8	81119.6	77066.2	59739.7
P36915	GNL1_HUMAN	REEQTDTSDGESVTHHIR.3	REEQT[Ph]DTS[Ph]DGESVTHHIR	84230.8	134971	48885.7	66229.8	80131.3	70142.7	100579	109731	46970.9	90611.6	84908.3	76716.9
P36915	GNL1_HUMAN	REEQTDTSDGESVTHHIR.3	REEQTDT[Ph]SDGESVTHHIR	27871.6	48603.4	9121.64	11888.3	2656.5	4435.13	5834.09	19473.4	7984.34	9707.8	22514.5
P36915	GNL1_HUMAN	REEQTDTSDGESVTHHIR.4	REEQT[Ph]DTS[Ph]DGESVTHHIR	52463.5	47462.4	26906	24726.7	19790.9	57550.6	46664.6	62589.1	30141.8	43470.1	33511.5	50468.6
P36915	GNL1_HUMAN	REEQTDTSDGESVTHHIR.4	REEQTDT[Ph]SDGESVTHHIR	43037.4	53111	28008	30497.3		26497.5	2170.48	39398	20486.9	16749.3	37097.5	15820
P36915	GNL1_HUMAN	REEQTDTSDGESVTHHIR.4	REEQTDTS[Ph]DGESVTHHIR	28497.5	8746.63	15763.9	19379.5	16085		34801.7	26194.4	14379.7	10577.2	26071
P36956	SRBP1_HUMAN	QENLSLR.2	QENLS[Ph]LR	673.425		854.508	3649.92	1012.28				871.628	6304.76	306.126
P37802	TAGL2_HUMAN	NFSDNQLQEGK.2	NFS[Ph]DNQLQEGK	30955.6	60432.4	155388	46109.7	72866.2	169883	41451.4	41090.3	82773.7	41366.1	56362.1	178618
P37837	TALDO_HUMAN	SSSPVKR.2	[ac]SS[Ph]SPVKR	89356	97688.2	155765	284311	123920	53572.1	117060	140682	187846	230904	189291	40337.7
P37837	TALDO_HUMAN	SSSPVKR.2	[ac]SSS[Ph]PVKR	87493.8	97709.6	153163	280421	121342	52834.8	114776	138231	212038	225868	146137	40525.5
P37837	TALDO_HUMAN	SSSPVKR.2	SSS[Ph]PVKR		5.14968	42.7018						24.6746
P38159	RBMX_HUMAN	GLPPSMER.2	GLPPS[Ph]MER	127393	30143.1	229760	167550	164370	49120	84158.4	150927	160009	124278	279955	40974.2
P38159	RBMX_HUMAN	VEQATKPSFESGR.2	VEQATKPS[Ph]FESGR	21498.7	39042.2	35757.9	47178.7	26385.5	33354.2	21364.7	22773.9	46666.1	38519.5	27423	25905.4
P38159	RBMX_HUMAN	VEQATKPSFESGR.3	VEQATKPS[Ph]FESGR	3999.06	2484.74	9438.72	9519.12	2823.8	6507.26	5113.37	4580.11	11315.3	5085.4	2934.7	5476.39
P38159	RBMX_HUMAN	VEQATKPSFESGRR.3	VEQATKPS[Ph]FESGRR	1870.17		2822.83	1295.2			1020.14	1415.85	2401.45	903.989	673.502
P38159;Q96E39	RBMX_HUMAN;RMXL1_HUMAN	DSYGGPPR.2	DS[Ph]YGGPPR	11762.3	13246.2	25773.7	10293.8	4018.94	40901.4	15189.6	11785.5	29391.5	9473.78	2827.66	45997.6
P38159;Q96E39	RBMX_HUMAN;RMXL1_HUMAN	DVYLSPR.2	DVYLS[Ph]PR	729525	527754	949885	861768	631602	314297	860503	582764	1.10801e+06	752738	458527	282120
P38159;Q96E39	RBMX_HUMAN;RMXL1_HUMAN	DYGHSSSRDDYPSR.3	DYGHS[Ph]SSRDDYPSR	27789.1	20591.3	24104.9	32565.2	17858.9	17786.7	27165.1	28945.7	30884.6	43833.2	26057.8	26101.2
P38398	BRCA1_HUMAN	SPSPFTHTHLAQGYR.3	SPS[Ph]PFTHTHLAQGYR	18985.3	12793.7	12884.6	12940.7	9562.72	7291.3	14816.8	17732.8	8573.02	9578.68	6802.02
P38432	COIL_HUMAN	AFQLEEGEETEPDCK.2	AFQLEEGEET[Ph]EPDC[cam]K	42115.2	38256	32267	56700.8	43609.5	24673.5	41512.6	50857.8	37829.3	42130.6	29638.7	40570.9
P38432	COIL_HUMAN	NSSEKLPTELSK.2	NS[Ph]SEKLPTELSK	24995.5	76507.2	24423.9	30106.1	13126.1	25460.4	22930.7	66211.4	23877.5	36615.2	14673.2	29484.4
P38919	IF4A3_HUMAN	ATTATMATSGSAR.2	[ac]ATTATM[ox]ATSGS[Ph]AR	2906.46	1278.7	4426.15	4839.92	8355.56	2820.97	2888.64	2547.27	5520.14	7996.45	4494.63	3188.44
P38919	IF4A3_HUMAN	ATTATMATSGSAR.2	[ac]ATTATMATSGS[Ph]AR	132707	125413	198550	300998	186011	186912	165730	163197	302999	429168	198602	197710
P39687	AN32A_HUMAN	ELVLDNSR.2	ELVLDNS[Ph]R	1895.33	7081.26	8636.84	11582.8	6915.69	8522.36	3302.78	9967.69	7691.31	12089.8	4457.9	9138.24
P39687;O95626	AN32A_HUMAN;AN32D_HUMAN	NRTPSDVK.2	NRT[Ph]PSDVK	3729.15	3344.51	97.0416	4710.39	4958.39	2865.88	4906.97	4384.28	1695.34	4278.84	5000.7	2965.27
P40222	TXLNA_HUMAN	RPEGPGAQAPSSPR.2	RPEGPGAQAPS[Ph]SPR	14381	27451.8	13833.4	15187.8	4583.99	12297.2	13896.1	16158.5	14083.9	16300.9	8454.62	8138.36
P40222	TXLNA_HUMAN	RPEGPGAQAPSSPR.2	RPEGPGAQAPSS[Ph]PR	13790.5	26337.6	13021.1	14229.8	4413.99	12023.1	13051.1	15580.4	11551.5	15736.8	8131.48	8132.81
P40222	TXLNA_HUMAN	RPEGPGAQAPSSPR.3	RPEGPGAQAPS[Ph]SPR	10600.5	11936.4	16434.2	10842.6	6622.11	12831.4	8568.01	13370.1	11388.4	8369.09	2815.23	5457.29
P40306	PSB10_HUMAN	TLSSPTEPVKR.2	TLSS[Ph]PTEPVKR	1357.1	16963	5321.18	9974.66	9085.85	3472.46	1189.55	4108.16	6241.84	7722.61	10368.5
P40425	PBX2_HUMAN	TAVSVTQGGHSR.2	TAVSVT[Ph]QGGHSR	36245.6		22185.2	15937.6	22751.8	19968.3	43271.2	22384.9	25840.1	25857	28097.7	6768.59
P40425	PBX2_HUMAN	TAVSVTQGGHSR.2	TAVSVTQGGHS[Ph]R	42016.2		21727.1	15716.5	23317.7	21464.2	49591.3	25041.5	29143.6	27882.2	30787.7	22788.1
P40425	PBX2_HUMAN	TAVSVTQGGHSR.3	TAVSVTQGGHS[Ph]R	466.981				315.085		551.855	199.074	434.308	496.408	158.402
P40692	MLH1_HUMAN	HREDSDVEMVEDDSRK.3	HREDS[Ph]DVEMVEDDSRK	44372.9	32325	40929.1	24575.2	42495.2	34798.7	41431.1	38032.9	45373.8	30073	105566	24782.8
P40692	MLH1_HUMAN	HREDSDVEMVEDDSRK.4	HREDS[Ph]DVEMVEDDSRK	11026.8	5042.88	13165.3	6290.33	4118.46	15109.6	9919.21	9372.3	12018.3	6760.34	20517.3	8187.51
P40818	UBP8_HUMAN	SYSSPDITQAIQEEEK.2	SYS[Ph]SPDITQAIQEEEK	37230.6	54229	36087.4	59031	73657.4	55517.7	40231.3	55866.4	35750.7	55289.9	76459.8	54189.6
P40818	UBP8_HUMAN	SYSSPDITQAIQEEEKR.2	SYS[Ph]SPDITQAIQEEEKR	40453.3	69318.7	50033	65786	95127.5	65693.5	47901.2	62456.4	58036.8	56356.7	71452.1	68611.5
P40818	UBP8_HUMAN	SYSSPDITQAIQEEEKR.3	SYS[Ph]SPDITQAIQEEEKR	74586.2	107629	75433.1	102194	139550	72674.3	80024.6	125237	81533.5	79389.1	150261	61549.7
P40925	MDHC_HUMAN	KLSSAMSAAK.2	KLS[Ph]SAMSAAK	7592.55	4924.46	6014.17	6267.49	9350.48	5674.7	7793.19	8101.24	5952.71	5084.66	15008.7
P41182	BCL6_HUMAN	GLVSPQSPQK.2	GLVSPQS[Ph]PQK	16584.8		9123.54	1815.79	2286.28		23100.3		6657.8		1527.34
P41182	BCL6_HUMAN	KGLVSPQSPQK.2	KGLVSPQS[Ph]PQK	23903.2	4840.27	7885.16				21492.6	987.414	7174.78		3035.79
P41182	BCL6_HUMAN	NACILQASGSPPAK.2	NAC[cam]ILQASGS[Ph]PPAK	145449		47318.9	7864.88			157523	7737.09	57536.4		3923.08
P41182	BCL6_HUMAN	SSSESHSPLYMHPPK.3	SSSESHS[Ph]PLYMHPPK	46065.3		15265.8	1923.5	1832.97	20917.3	62545.9	5476.19	13724.2	957.656	2912.07
P41208	CETN2_HUMAN	MSPKPELTEEQK.2	MS[Ph]PKPELTEEQK	16140	15218.4	14578.6	13948.3	15402.1	15667.6	11317	13331	16373.2	8859.01	20122.2	13640.3
P41208	CETN2_HUMAN	MSPKPELTEEQKQEIR.3	MS[Ph]PKPELTEEQKQEIR	10878.5		7608.16	2388.25	2403.38	5690.74	14682.6	6490.31	7014.96	3816.83	5484.38	23487.6
P41208	CETN2_HUMAN	RMSPKPELTEEQK.3	RMS[Ph]PKPELTEEQK	19605.7	9780.93	40160.9	12714.9	13922		18492	14739.1	34996.6	8011.93	16443.4	13390.8
P41212	ETV6_HUMAN	ISYTPPESPVPSYASSTPLHVPVPR.3	ISYT[Ph]PPES[Ph]PVPSYASSTPLHVPVPR	544.884	166281	1459.59	87361.7	17609.7	1.32236e+06		237549		367528	24758.9	2.75375e+06
P41212	ETV6_HUMAN	ISYTPPESPVPSYASSTPLHVPVPR.4	ISYT[Ph]PPES[Ph]PVPSYASSTPLHVPVPR		26436		13048.1		208783		36842.6		55790.5	2199.39	432592
P41227	NAA10_HUMAN	HVVLGAIENKVESK.3	HVVLGAIENKVES[Ph]K	7909.84	6486.75	5180.6	11759.2	4410.16	5668.32	11797	8837.08	5168.53	10127	9086.79
P41252	SYIC_HUMAN	APLKPYPVSPSDK.2	APLKPYPVS[Ph]PSDK	17160.1		16849	23720.5	19555.3		15587.2	3499.78	23052.3	26986.2	25026.5
P41252	SYIC_HUMAN	APLKPYPVSPSDK.3	APLKPYPVS[Ph]PSDK	1303.59		1735.2	3345.52	1466.89		2412.88		3096.22	1984.61	3540.03
P42166;P42167	LAP2A_HUMAN;LAP2B_HUMAN	GPPDFSSDEEREPTPVLGSGAAAAGR.3	GPPDFS[Ph]S[Ph]DEEREPT[Ph]PVLGSGAAAAGR	102079	177530	41855.8	89896.4	54976.6	160194	149073	255188	98472.2	209491	101893	217423
P42166;P42167	LAP2A_HUMAN;LAP2B_HUMAN	GPPDFSSDEEREPTPVLGSGAAAAGR.3	GPPDFS[Ph]S[Ph]DEEREPTPVLGSGAAAAGR	908025	1.95911e+06	853220	1.64723e+06	907103	1.68376e+06	1.20591e+06	2.02134e+06	860052	2.32736e+06	1.0038e+06	2.4841e+06
P42166;P42167	LAP2A_HUMAN;LAP2B_HUMAN	GPPDFSSDEEREPTPVLGSGAAAAGR.3	GPPDFS[Ph]SDEEREPTPVLGSGAAAAGR	111585	220229	85446.8	133772	130556	89788.4	145786	353558	122381	131375	137844	60371.1
P42166;P42167	LAP2A_HUMAN;LAP2B_HUMAN	GPPDFSSDEEREPTPVLGSGAAAAGR.3	GPPDFSS[Ph]DEEREPT[Ph]PVLGSGAAAAGR	80270.2	124319	61552.3	99550.5	85289.5	24980.7	39750.3	112906	86227.9	101162	83691.2	78801.4
P42166;P42167	LAP2A_HUMAN;LAP2B_HUMAN	GPPDFSSDEEREPTPVLGSGAAAAGR.3	GPPDFSS[Ph]DEEREPTPVLGSGAAAAGR	115953	229052	90801.5	141792	147193	77137.2	152534	374711	130533	142031	148368	82800.9
P42166;P42167	LAP2A_HUMAN;LAP2B_HUMAN	GPPDFSSDEEREPTPVLGSGAAAAGR.4	GPPDFS[Ph]S[Ph]DEEREPTPVLGSGAAAAGR	247417	397053	198748	420363	129868	408121	288582	518007	194974	542091	253948	560223
P42166;P42167	LAP2A_HUMAN;LAP2B_HUMAN	SSTPLPTISSSAENTR.2	S[Ph]ST[Ph]PLPTISSSAENTR	46824.8	536324		210078	20417	399657	46396.6	33504.6	11862.5	384003	16672.5	90818.4
P42166;P42167	LAP2A_HUMAN;LAP2B_HUMAN	SSTPLPTISSSAENTR.2	SST[Ph]PLPTIS[Ph]SSAENTR	9469.89	2603.73	2610.43	46646.3		86965.8	16771.6	11041.1	6731.98	11466.2	7434.04	138278
P42166;P42167	LAP2A_HUMAN;LAP2B_HUMAN	SSTPLPTISSSAENTR.2	SST[Ph]PLPTISSSAENTR	915569	741284	233771	297720	918079	556960	1.12215e+06	1.32629e+06	409585	532585	923237	940777
P42167	LAP2B_HUMAN	AKTPVTLK.2	AKT[Ph]PVTLK	12736.7	8476.1	5762.12	6493.3	7053.66		23041.8	19101.5	26670.7	10887.9	7817.89
P42167	LAP2B_HUMAN	MEESFSSK.2	MEES[Ph]FSSK	1725.7	500.229		2623.92	615.197	835.999	2211.36	4516.05	2930.95	3890.92	793.652
P42331	RHG25_HUMAN	DIPLSPPAQK.2	DIPLS[Ph]PPAQK	2859.35	51977.9	8308.61	191739	282379		7213.86	98903.2	115.06	137832	252668
P42331	RHG25_HUMAN	GDTLASPNSETGPGK.2	GDTLAS[Ph]PNSETGPGK	3535.1	34792.2	5265.14	45407.3	45600.5			15930.4	7929.41	44827.4	43820.3
P42331	RHG25_HUMAN	GDTLASPNSETGPGKK.2	GDTLAS[Ph]PNSETGPGKK		25293.7		21896.1	15284.9			11404.5		33478	22866.1
P42331	RHG25_HUMAN	GDTLASPNSETGPGKK.3	GDTLAS[Ph]PNSETGPGKK	793.192	5276.68	889.42	9128.3	7346.05		733.298	2794.94	893.93	9411.93	6744.32
P42331	RHG25_HUMAN	SKDIPLSPPAQK.2	SKDIPLS[Ph]PPAQK	7508.44	106840	5565.05	176293	208915		11173.3	64796.1		138013	249937
P42331	RHG25_HUMAN	SSVGWDATEDLR.2	S[Ph]SVGWDATEDLR	17191.2	28337.2	18262.2	22926.4	64027.3		11847.8	16406.5	14394.6	16785.8	35933.1
P42331	RHG25_HUMAN	TMSQDLR.2	TMS[Ph]QDLR	5410.51	2161.94	5158.7	7350.3	76138.8		6268.1	3477.05	6874.89	6365.2	53698.2
P42331	RHG25_HUMAN	TSTYDNVPSLPGSPGEEASALSSQACDSK.3	TSTYDNVPS[Ph]LPGS[Ph]PGEEASALSSQAC[cam]DSK	100230	225257	60729.6	253218	1.09569e+06		96847.7	161831	50064.9	370589	495857
P42356	PI4KA_HUMAN	SNLDITVGSR.2	S[Ph]NLDITVGSR	8518.32	21468.4	5566.98	15518.3	14019.4		8361.41	17484	4698.63	15467.3	11791.6
P42566	EPS15_HUMAN	SINKLDSPDPFK.2	SINKLDS[Ph]PDPFK	57853.9	20380.6	10734.3	41239.7	36325.6		49003.7	10394.4	18055.8	43194.3	31308.8
P42566	EPS15_HUMAN	SSPELLPSGVTDENEVTTAVTEK.3	S[Ph]SPELLPSGVTDENEVTTAVTEK	104813	38443.6	80640.8	90656.6	83888.6	19307.6	92305.4	28033.7	60380.4	79712.1	70908.1	19854.3
P42677	RS27_HUMAN	DLLHPSPEEEK.2	DLLHPS[Ph]PEEEK			36795.4	114194	33682.2	25933.1	3540.58	26865.9	33421.3	82643.7	27216
P42677	RS27_HUMAN	DLLHPSPEEEKRK.3	DLLHPS[Ph]PEEEKRK	97.8545	527.538		1583.94	32.3535			30.2987		2533.5	38.5104
P42684	ABL2_HUMAN	DKSPSSLLEDAK.2	DKS[Ph]PSSLLEDAK	23308.5	14385.1	16576.4	22743.2	23989.2	24494.4	22842.7	11852.7	12841.3	25485.8	20832.6	19342.9
P42684	ABL2_HUMAN	GAQASSGSPALPR.2	GAQASSGS[Ph]PALPR	19350.8			36430.9	6008.96						12248.6
P42696	RBM34_HUMAN	SVQEGENPDDGVR.2	S[Ph]VQEGENPDDGVR	26354.5	21448.5	12496.2	10256.2	7574.12	48046.5	15663.5		8098.7	8644.92		21074.6
P42858	HD_HUMAN	EKEPGEQASVPLSPK.2	EKEPGEQASVPLS[Ph]PK	15894.4	32344.2	30654	62611.9	91922.5		12171.7	30173.2	30037.5	69037.7	70756.4
P42858	HD_HUMAN	LLSPQMSGEEEDSDLAAK.2	LLSPQMS[Ph]GEEEDSDLAAK		15263.6		9325.92	22329.9		66.8055	15279		7791.75	14544.9
P42858	HD_HUMAN	RHSLSSTK.2	RHS[Ph]LSSTK	591.557		886.388	804.431	5088.3			434.054		1065.81	1464.82
P43243	MATR3_HUMAN	KRSYSPDGK.2	KRS[Ph]YS[Ph]PDGK	3046.87	5040.75		2272.08	3607.6	5542.61		4294.41	2824.59	2260.66	3496.27
P43243	MATR3_HUMAN	RDSFDDR.2	RDS[Ph]FDDR	54640.9	32740.7	98753.9	33085.2	118366	44498.6	38496.6	27307	93506.3	26783	49465.8	50642.4
P43243	MATR3_HUMAN	RDSFDDRGPSLNPVLDYDHGSR.3	RDS[Ph]FDDRGPSLNPVLDYDHGSR	132446	80347.1	144253	92125.6	202793	88967.8	185417	72342.4	151201	110119	93286	112344
P43243	MATR3_HUMAN	RDSFDDRGPSLNPVLDYDHGSR.4	RDS[Ph]FDDRGPSLNPVLDYDHGSR	1.64447e+06	972285	1.88982e+06	1.11364e+06	1.00718e+06	1.12988e+06	2.02831e+06	880471	1.78673e+06	1.31863e+06	1.14839e+06	1.41388e+06
P43243	MATR3_HUMAN	SATREPPYR.2	S[Ph]ATREPPYR	33728.4	37387.1	33146.4	33563.4	20802.3	37837.6	33799.9	29052.6	39891.7	35124	36207.1	36292.8
P43243	MATR3_HUMAN	SYSPDGK.2	SYS[Ph]PDGK	25923.6	84486	48111.8	20406.2	28585.6	40559.8	32995.9	29469.4	43838.8	12892.8	34663.2	111606
P43243	MATR3_HUMAN	SYSPDGKESPSDKK.2	SYS[Ph]PDGKES[Ph]PSDKK	77477.5	79575.4	69100.4	58875.9	115366	76658.8	69562.2	59513.7	67241.6	90351.3	82531.5	106172
P43243	MATR3_HUMAN	SYSPDGKESPSDKK.3	SYS[Ph]PDGKES[Ph]PSDKK	24436.5	28701.7	20829.8	15633.8	33531.4	34991.9	24241.5	23769.5	17694.6	24165.4	26453.8	32704.6
P43405	KSYK_HUMAN	EALPMDTEVYESPYADPEEIRPK.3	EALPMDTEVYESPY[Ph]ADPEEIRPK	1407.33	27077.7			10135.6	14062.7	1472.64	34984		939.157	10539.4	11653.2
P43405	KSYK_HUMAN	SYSFPKPGHR.2	SYS[Ph]FPKPGHR	101809	106226	60733.1	37492.7	57706.6	8185.71	99175	103343	43586.4	29962.7	78767.2
P43405	KSYK_HUMAN	SYSFPKPGHR.3	SYS[Ph]FPKPGHR	52292.4	53868.9	34523.5	25061.9	19606.4	4698.06	53721.1	72176.7	28818.2	20762.9	34125.9
P45973	CBX5_HUMAN	RKSNFSNSADDIK.3	RKS[Ph]NFSNSADDIK	1810.72		3479.53	1334.35			3133.28	1423.1		1520.48	755.513
P45973	CBX5_HUMAN	TADSSSSEDEEEYVVEK.2	TADS[Ph]S[Ph]S[Ph]S[Ph]EDEEEYVVEK	1.08225e+06	1.92188e+06	907128	384157	5838.21	2.47113e+06	213311	662793	822782	747782	65410.9	4.1201e+06
P45973	CBX5_HUMAN	TADSSSSEDEEEYVVEK.2	TADS[Ph]SSSEDEEEYVVEK	14219.4	11862.5	23479.8	15650.7	2736.51	11645.3	10972.2	8898.92	19688.1	10510.3	3834.84	9352.92
P45973	CBX5_HUMAN	TADSSSSEDEEEYVVEK.2	TADSS[Ph]SSEDEEEYVVEK	18903	15394.6	30646.1	21338.5	5764.25	16664	15123.5	11541	26562.3	14396	7492.27
P45973	CBX5_HUMAN	TADSSSSEDEEEYVVEK.2	TADSSS[Ph]SEDEEEYVVEK	16577.6	13267.7	26886.6	18084.5	5007.78	14958.1	12880	10258.8	22918.1	12833	6056.62
P45974	UBP5_HUMAN	SAADSISESVPVGPK.2	SAADS[Ph]ISESVPVGPK	13068.1		7592.13	15413.7	29996.8	18070.4	11330.2	6066.64	13442.1	12794.8	17877.9	9335.66
P46013	KI67_HUMAN	AFKESPK.2	AFKES[Ph]PK	6353.11	6427.2	11504.5	2510.56	9542.65	7356.76	7258.27	10269.2	13429.8	4533.12	4915.56	4723.41
P46013	KI67_HUMAN	AQSLVISPPAPSPR.2	AQSLVIS[Ph]PPAPS[Ph]PR	21123.5	15622	19065.2	14447.7	9995.61	41204.5	19242.4	15318.9	22081.3	36063.7	22123.6	45437
P46013	KI67_HUMAN	AQSLVISPPAPSPR.2	AQSLVISPPAPS[Ph]PR	211638	336748	415572	134768	151493	217614	205083	356052	466285	181127	110873	212695
P46013	KI67_HUMAN	DINTFLGTPVQK.2	DINTFLGT[Ph]PVQK	24353.6		20344.2	17591.3	30441		18416.2	17702.4	25562.7	18627.9	30706.3
P46013	KI67_HUMAN	DINTFVGTPVEK.2	DINTFVGT[Ph]PVEK	7327.28		7405.86	4564.07	9806.12		7979.36	4015.44	16700.7	8977.3	7442.07
P46013	KI67_HUMAN	IACKSPPPESVDTPTSTK.3	IAC[cam]KS[Ph]PPPESVDTPTSTK	22147.1	31518.6	7542.94	3295.57	31709.7	33015.4	20545.2	22675.1	10726.5	9494.89	28424.4
P46013	KI67_HUMAN	IACRSPQPDPVGTPTIFKPQSK.3	IAC[cam]RS[Ph]PQPDPVGT[Ph]PTIFKPQSK	25500		40579.3	20058.6		23755.7	41366.9	21225.8	60769.6	44106.6	39427.6	19248.6
P46013	KI67_HUMAN	IPCKSSPELEDTATSSK.2	IPC[cam]KSS[Ph]PELEDTATSSK	16405.4		15082.3	3268.59	6532.61		9149.78	7700.35	18575.9	7140.55	9411.53
P46013	KI67_HUMAN	IPCKSSPELEDTATSSK.3	IPC[cam]KS[Ph]SPELEDTATSSK	11599.9	12017.3	8912.19	3104.14	12709.1	7729	9357.18	15143.6	12692.4	5855.43	11795.2
P46013	KI67_HUMAN	LDLLGNLPGSK.2	LDLLGNLPGS[Ph]K	18553.3	2639.48	17111.6	9960.62	5504.62		17886.2	9148.11	43850.3	38106.6	9110.44
P46013	KI67_HUMAN	LDLLGNLPGSKR.2	LDLLGNLPGS[Ph]KR	14354.5	3095.76	10279.6	5034.3	3228.82		12390.3	6539.07	25131.2	29035.6	7628.47
P46013	KI67_HUMAN	LKTSLGK.2	LKTS[Ph]LGK			1282.79	985.795	613.82		731.111		1847.88	845.74
P46013	KI67_HUMAN	RESVNLGK.2	RES[Ph]VNLGK	7977.55		7432.15	1110.59	1663.43	3753.89	5380.35	1675.6	6363.65	1901.21	1345.57
P46013	KI67_HUMAN	SGASEANLIVAK.2	S[Ph]GASEANLIVAK	27890.8	10724.6	33088	15728.9	12708.4	17430.2	29663	19381.5	54487.8	48137.3	13955.4	37913.7
P46013	KI67_HUMAN	SGGSGHAVAEPASPEQELDQNK.3	SGGSGHAVAEPAS[Ph]PEQELDQNK	176115	250083	137425	66198	118705	155781	189200	243944	138693	96871.8	95852	248807
P46013	KI67_HUMAN	SLVMHTPPVLK.2	S[Ph]LVMHT[Ph]PPVLK	10193.4	1433.65	13857.2	4517.59	829.895	4158.79	8017.72	5697.4	24943	16592	6604.78	8972.57
P46013	KI67_HUMAN	TPVQYSQQQNSPQK.2	TPVQYSQQQNS[Ph]PQK	32984.6	84884	29885.3	15729.2	14942.7	56687.6	35204.4	63262.3	32287.5	24527.2	30660.8	53528.7
P46019	KPB2_HUMAN	SLNLVDSPQPLLEK.2	S[Ph]LNLVDSPQPLLEK	72654.4	37387.1	60068.4	24067.1	78074.2	23135.7	55641.4	22192.7	42214.6	12121.9	51652	14999.3
P46087	NOP2_HUMAN	EAAAGIQWSEEETEDEEEEKEVTPESGPPK.3	EAAAGIQWS[Ph]EEET[Ph]EDEEEEKEVTPESGPPK	230706	413101	339090	269783	541678	668025	235649	329805	273551	343346	296455	763677
P46087	NOP2_HUMAN	GPQPPTVSPIR.2	GPQPPTVS[Ph]PIR	56436.1	70353.8	100505	104237	122736	72570.2	52737.1	86444.5	92054.8	113157	107345	59960.2
P46087	NOP2_HUMAN	GTDTQTPAVLSPSK.2	GTDTQTPAVLS[Ph]PSK	229188	267785	400848	332255	426429	204420	189010	283485	400212	405539	262661	181552
P46087	NOP2_HUMAN	TNKSPEAKPLPGK.2	TNKS[Ph]PEAKPLPGK	15780.8	32345.9	29951.4	29537	40139.5	30105.4	15185	21677.4	29137.1	32776.1	31238.2	59182.9
P46087	NOP2_HUMAN	TNKSPEAKPLPGK.3	TNKS[Ph]PEAKPLPGK	14738.6	13619	42919.5	43904.7	28391.4	30000.8	17706.8	28482.4	43227.2	44525.4	29253	21615.7
P46100	ATRX_HUMAN	DFDSSEDEKHSK.2	DFDS[Ph]S[Ph]EDEKHSK	5144.53	12490.2	2543.24	8631.63	8342.92	3473.76	5375.92	8274.56	1881.33	11920.8	7863.59	3226.96
P46100	ATRX_HUMAN	EVIEIEDASPTK.2	EVIEIEDAS[Ph]PTK	20916.6	25999.7	15624.3	33944.3	25447.8	6091.76	18132	20495.7	19488.4	22390.1	12811.5
P46100	ATRX_HUMAN	EVIEIEDASPTKCPITTK.3	EVIEIEDAS[Ph]PTKC[cam]PITTK	5202.92	3634.47	2844.5	6944.05	3145.34		6385.75	6457.16	2773.35	7126.25	3360.72
P46100	ATRX_HUMAN	HKLTVSDGESGEEK.2	HKLTVS[Ph]DGES[Ph]GEEK	3623.8	7231.44		3031.31	4262.97	3508.68	4213.71	6319.87		4565.06	3713.36
P46100	ATRX_HUMAN	HKLTVSDGESGEEKK.2	HKLTVS[Ph]DGES[Ph]GEEKK	1803.67	4980.56		895.876		1786.07	1412.43	2146.57		1511.15	1599.26
P46100	ATRX_HUMAN	KKDELSDYAEK.2	KKDELS[Ph]DYAEK	23851.5	47659.2	16916.3	31985	21857.6	18255.6	18578.3	37092.3	19807.8	30716.6	21215.6	14455.3
P46100	ATRX_HUMAN	KKDELSDYAEK.3	KKDELS[Ph]DYAEK	5510.73	5163.68	5930.81	12230.4	2812.51	6830.21	8454.01	12325.5	6772.82	9060.02	1615.44	6709.82
P46100	ATRX_HUMAN	LTPVSLSNSPIK.2	LTPVS[Ph]LS[Ph]NSPIK	16718.8	10797	9560.86	15887.1	9335.65	18333.9	24296.9	23023.9	26486.3	48754.3	12909.7	32160.8
P46100	ATRX_HUMAN	LTPVSLSNSPIK.2	LTPVSLS[Ph]NSPIK	26349	51243.3	27802.3	67272.9	33429.9	8885.55	14598.3	37391.1	17309.3	23444.2	22085.8	10879.8
P46100	ATRX_HUMAN	LTVSDGESGEEK.2	LTVS[Ph]DGES[Ph]GEEK	1943.7	4691.89		1009.52	4305.19	1619.26	1793.43	2223.41	1046.64	1278.5	1942.73	2109.83
P46100	ATRX_HUMAN	LTVSDGESGEEKK.2	LTVS[Ph]DGES[Ph]GEEKK	36432.8	51136.3	38750.8	24778.1	23465.4	20328.9	25220.6	40005.2	28191.3	26151.3	41279.7	27292.1
P46100	ATRX_HUMAN	RKPSIVTK.2	RKPS[Ph]IVTK	2010.38		787.602	1800.21	1483.24	4784.99	808.364		804.575	327.018	465.818
P46100	ATRX_HUMAN	RPTETNPVTSNSDEECNETVK.3	RPTETNPVT[Ph]S[Ph]NS[Ph]DEEC[cam]NETVK	26894.3	129358	10109.4	31694.4	52036.9	27113.3	20573.2	62127.4	11820.7	42719.6	38139.2	44859.2
P46100	ATRX_HUMAN	RPTETNPVTSNSDEECNETVK.3	RPTETNPVTSNS[Ph]DEEC[cam]NETVK	81069.8	129693	37281.7	92137.1	110980	62784.8	52111.4	76257.6	38591.7	128102	70851.3	52891.4
P46379	BAG6_HUMAN	APPQTHLPSGASSGTGSASATHGGGSPPGTR.3	APPQTHLPSGASSGTGSASATHGGGS[Ph]PPGTR	162902	241993	127332	154817	274255	127430	154364	113913	146702	193532	180592	133223
P46379	BAG6_HUMAN	APPQTHLPSGASSGTGSASATHGGGSPPGTR.4	APPQTHLPSGASSGTGSASATHGGGS[Ph]PPGTR	225164	228800	193946	237781	197655	172254	242378	179156	225469	248291	257835	188471
P46379	BAG6_HUMAN	ASPEPQR.2	AS[Ph]PEPQR	12307	2448.48	6016.68	17139.7	15551.5	5863.47	22034.8	13008.1	21270.6	12675.8	18444.6	10974.3
P46379	BAG6_HUMAN	ENASPAPGTTAEEAMSR.2	ENAS[Ph]PAPGTTAEEAM[ox]SR	15873.6		8828.57	11667.1	23414.9			18924.4	11688.9		21460.3
P46379	BAG6_HUMAN	ENASPAPGTTAEEAMSR.2	ENAS[Ph]PAPGTTAEEAMSR	145249	109079	96599	99931.7	135553	82579.3	140725	97745.6	109624	85727.4	111048	100561
P46777	RL5_HUMAN	KASFLR.2	KAS[Ph]FLR	572.553		2893.02	1619.04	390.521		897.565	5222.38	2910.83	1983.2	768.631
P46821	MAP1B_HUMAN	ADSRESLKPAAK.3	ADS[Ph]RESLKPAAK		313.206			2125.51	15777.5		2151.87			2567.54	9176.07
P46821	MAP1B_HUMAN	EVPSKEEPSPVKAEVAEK.3	EVPSKEEPS[Ph]PVKAEVAEK		9352.01			32070.5	58068.7		16092.5			32349.2	42587.4
P46821	MAP1B_HUMAN	GAESPFEEK.2	GAES[Ph]PFEEK					3125.48	9980.71		3311.42			2066.29	14649.8
P46821	MAP1B_HUMAN	KESKEETPEVTK.3	KES[Ph]KEETPEVTK		1444.13			2916.67	9927.96		1873.85			5015.32	17890.3
P46821	MAP1B_HUMAN	KETPPKEVK.2	KET[Ph]PPKEVK			9341.82	431.459	17491.7	16579.1					17097.1	12361
P46821	MAP1B_HUMAN	SLMSSPEDLTK.2	SLM[ox]S[Ph]S[Ph]PEDLTK					2650.92	20426.9		691.802	226.471	536.152	1508.23	29101.7
P46821	MAP1B_HUMAN	SLMSSPEDLTK.2	SLMS[Ph]S[Ph]PEDLTK		10539.7			13450.8	236968		11495.1	1.6657		27544.9	311257
P46821	MAP1B_HUMAN	SPSLSPSPPSPLEK.2	SPSLSPSPPS[Ph]PLEK		42721.5		2854.24	67922.4	187443		44839.4	5394.69		57609.5	114044
P46821	MAP1B_HUMAN	VQSLEGEKLSPK.2	VQSLEGEKLS[Ph]PK		8405.95			45108.2	77607.5		10300.9			29565.8	64027.2
P47974	TISD_HUMAN	RHSASNLHALAHPAPSPGSCSPK.4	RHS[Ph]ASNLHALAHPAPSPGSC[cam]SPK	135843	41201.3	89185.3	27913.8			111599	39671	56764.8	34575.3	32388.8
P47974	TISD_HUMAN	RHSASNLHALAHPAPSPGSCSPK.5	RHS[Ph]ASNLHALAHPAPSPGSC[cam]SPK	23983.9	7185.6	17038.2	4325.05			27052.8	11639.1	12094.1	11540.4	5408.45
P47974	TISD_HUMAN	RHSASNLHALAHPAPSPGSCSPK.5	RHSAS[Ph]NLHALAHPAPSPGSC[cam]SPK	28319.4	8998.74	19814	5121.06			30262.7	11356.8	13026.5	12328.5	6804.6
P48634	PRC2A_HUMAN	DYSYER.2	DYS[Ph]YER	4440.29	2552.34	6358.72	8253.52	9719.22	3546.15	6359.58	3586.51	6996.64	5182.58	2719.02	7393.93
P48634	PRC2A_HUMAN	KGNSPNSEPPTPK.2	KGNS[Ph]PNSEPPTPK	20521.2	18884.7	13583.4	19296.4	15675.1	10428.2	15615	7028.14	12771.5		30379.1	10024.3
P48634	PRC2A_HUMAN	KQSSSEISLAVER.2	KQS[Ph]SSEISLAVER	24401.5		32976.9	11304.8	15492.4		12226.1	1785.29	13645.6		9572.32
P48634	PRC2A_HUMAN	LIPGPLSPVAR.2	LIPGPLS[Ph]PVAR	15393.8	26394.6	22142.8	46604.6	20077.2	19122.7	14196.4	19990.1	26147.5	30880.3	23204.6	8842.97
P48634	PRC2A_HUMAN	PLTSPLR.2	PLTS[Ph]PLR	4849.4	3984.2	7404.78	8527.43	2846.02	1951.3	3964.13	3212.76	6202.28	7110.38	3491.28
P48634	PRC2A_HUMAN	TASETRSEGSEYEEIPKR.3	TAS[Ph]ET[Ph]RS[Ph]EGSEYEEIPKR	41361.4	61446.2	39880.7	50564.6	33037	78261.1	42379.4	34406.3	32361.7	70214.9	33570.9	85897.1
P48634	PRC2A_HUMAN	TASETRSEGSEYEEIPKR.3	TAS[Ph]ETRS[Ph]EGS[Ph]EYEEIPKR	42112.6	62030.7	40136	52332.2	33289.6	78677.9	43305.2	35129.8	31873.4	71266.4	33980.6	83387.1
P48634	PRC2A_HUMAN	TASETRSEGSEYEEIPKR.3	TAS[Ph]ETRS[Ph]EGSEYEEIPKR	33283.7	60338.2	35063.8	28673.7	42973.9	52893.2	29744.9	38227.2	20604.4	39744.1	44738.7	71329
P48634	PRC2A_HUMAN	TASETRSEGSEYEEIPKR.3	TASET[Ph]RS[Ph]EGSEYEEIPKR	34516.1	59388.3	34550.5	28056.2	43773.2	54208.3	28781	36469.5	15722.7	33223.4	43530.2	70876.6
P49006	MRP_HUMAN	GDVTAEEAAGASPAK.2	GDVTAEEAAGAS[Ph]PAK	215063	521979	362802	120646	218270	56637.9	180689	217829	463153	123714	200918	51179.5
P49006	MRP_HUMAN	KKFSFK.2	KKFS[Ph]FK	8180.76	18407.4	85280.1	2263.65			22243.5	35158.6	76045.6	6913.78	5041.84
P49006	MRP_HUMAN	LSGLSFK.2	LSGLS[Ph]FK	3666.14	17999.3	26935.3	6159.03	7761.29	3955.49	2632.41	18691.9	33811.9	2805.85	4691.05	3512.11
P49006	MRP_HUMAN	LSGLSFKR.2	LSGLS[Ph]FKR	64328.6	175684	370104	124645	60015	33916.9	64364	271340	410235	97974.5	103292	42693.9
P49321	NASP_HUMAN	KPEEESPR.2	KPEEES[Ph]PR	8890.35	9726.63	14722.2	8803.45	10813.8	6896.16	6054.94	12273	15579.7	8363.77	3521.53
P49450	CENPA_HUMAN	RRSPSPTPTPGPSR.2	RRS[Ph]PS[Ph]PTPTPGPSR	22466	41101	9276.04	13079.3	7656.13	25099.8	24307.2	25531.4	8575.73	20439	8090.33	45029.4
P49450	CENPA_HUMAN	RRSPSPTPTPGPSR.2	RRS[Ph]PSPT[Ph]PTPGPSR	15678.2	27683.4	5719.48	9216.1	5024.72	16007.9	16194.7	17161.5	6027.67	14139.3	5747.5	28815.5
P49450	CENPA_HUMAN	RRSPSPTPTPGPSR.3	RRS[Ph]PS[Ph]PTPTPGPSR	167613	217721	63216.9	74763.7	39559.7	200100	137590	155014	56020.3	98431.1	49595.8	213326
P49450	CENPA_HUMAN	RRSPSPTPTPGPSR.3	RRS[Ph]PSPT[Ph]PTPGPSR	139411	182431	54405.6	62438	33919.2	166376	113527	127504	46056.3	81639.2	40976.6	176782
P49585	PCY1A_HUMAN	AAAYDISEDEED.2	AAAYDIS[Ph]EDEED	22876.2	16236.5	10446.1	16424.1	61069.3	12444.1	22582.3	22241	10414.5	18387.2	29341.2	17094.4
P49585	PCY1A_HUMAN	ERSPSPSFR.2	ERS[Ph]PS[Ph]PSFR	122718	160534	51272.3	79052.1	206453	122614	135276	179108	48354.3	98743.7	224525	168155
P49585	PCY1A_HUMAN	SPSPSFR.2	SPS[Ph]PSFR	15406.6	4604.74	5034.42	8040.11	17327.9	6741.11	18344.2	9496.89	6536.95	5195.32	13836.5	4688.47
P49585	PCY1A_HUMAN	TSPPCSPANLSR.2	TS[Ph]PPC[cam]S[Ph]PANLSR	115392	232579	55156.3	97070.4	185384	141537	129394	134168	56156.6	136552	150213	154327
P49590	SYHM_HUMAN	DLSPQHMVVR.2	DLS[Ph]PQHMVVR	11184.5	8386.74	16266.2	10328.7	1882.73	25183.8	15646.6	16728.2	15819	13384.8	2532.28	29587.2
P49711	CTCF_HUMAN	THSGEKPYECYICHAR.4	THS[Ph]GEKPYEC[cam]YIC[cam]HAR	4750.58	2569.9	11282.6	6023.93	943.799		5448.57	5204.92	17264.5	16971.3	3441.53
P49736	MCM2_HUMAN	AESSESFTMASSPAQR.2	[ac]AESSESFTM[ox]ASS[Ph]PAQR	75472.1	54292.8	36775.8	20150.5	77881.4	56225.3	60790.4	55175.1	31029	16336.7	44826.2	54606.8
P49736	MCM2_HUMAN	AESSESFTMASSPAQR.2	[ac]AESSESFTMASS[Ph]PAQR	660465	815793	341371	212115	475136	613250	649901	741211	394603	144548	373093	626789
P49736	MCM2_HUMAN	GLLYDSDEEDEERPAR.2	GLLYDS[Ph]DEEDEERPAR	1.06935e+06	963734	993728	213209	1.079e+06	677236	1.10177e+06	1.26661e+06	1.27266e+06	194257	790208	686702
P49736	MCM2_HUMAN	GLLYDSDEEDEERPAR.3	GLLYDS[Ph]DEEDEERPAR	2.33311e+06	2.12721e+06	2.18897e+06	478921	1.82736e+06	1.69706e+06	2.21902e+06	3.35016e+06	2.53296e+06	351874	1.99763e+06	1.86756e+06
P49736	MCM2_HUMAN	GLLYDSDEEDEERPARK.3	GLLYDS[Ph]DEEDEERPARK	60756.6	60022.4	61322.2	52737.5	31056.9	34262.5	69827.9	100099	67918		51915.7	28053.7
P49736	MCM2_HUMAN	GNDPLTSSPGR.2	GNDPLTS[Ph]S[Ph]PGR	22934.8	23978.1	48158.4	18870.5	8308.21	29794.4	20408.1	23918	35275.3	22677	5898.06	41227.7
P49736	MCM2_HUMAN	GNDPLTSSPGR.2	GNDPLTS[Ph]SPGR	514775	767351	465542	243543	467378	741087	456323	979815	500454	222102	425686	583676
P49736	MCM2_HUMAN	GNDPLTSSPGR.2	GNDPLTSS[Ph]PGR	838097	1.22181e+06	776552	397428	745306	1.27092e+06	745206	1.59422e+06	831528	363208	678933	1.13382e+06
P49736	MCM2_HUMAN	RGLLYDSDEEDEERPAR.3	RGLLYDS[Ph]DEEDEERPAR	241147	327723	219303	50329.4	180731	183131	326707	412323	268050	43066	272264	178517
P49736	MCM2_HUMAN	RGLLYDSDEEDEERPAR.4	RGLLYDS[Ph]DEEDEERPAR	9514.19	19701.7	10127.4		3419.31	12599.9	16244.7	32272.9	10877.8		13813.6
P49736	MCM2_HUMAN	RGNDPLTSSPGR.2	RGNDPLT[Ph]SSPGR	586671	759913	451126	320675	620773	471133	494695	766195	349914	262221	566440	375256
P49736	MCM2_HUMAN	RGNDPLTSSPGR.2	RGNDPLTS[Ph]SPGR	586671	759913	451126	320675	620773	471133	494695	766195	349914	262221	566440	375256
P49736	MCM2_HUMAN	RGNDPLTSSPGR.2	RGNDPLTSS[Ph]PGR	586671	759913	451126	320675	620773	471133	494695	766195	349914	262221	566440	375256
P49736	MCM2_HUMAN	RGNDPLTSSPGR.3	RGNDPLTS[Ph]SPGR	29996.3	23132.7	42674.7	22433.6	23239.7	40685.8	46414.8	55838.1	39538.6	12506.7	15744.4	32142.4
P49736	MCM2_HUMAN	RGNDPLTSSPGR.3	RGNDPLTSS[Ph]PGR	37767	30191.6	50821.1	27665.9	28308.3	51544.8	60390.5	70458.7	49069.3	13698.3	20899	39937.7
P49736	MCM2_HUMAN	RTDALTSSPGR.2	RTDALT[Ph]S[Ph]S[Ph]PGR	27182.8	51561.4	45767.8	17611.1	20078.2	47326.3	21072.8	32266.5	41694.9	19047.5	12106.7	56173.5
P49736	MCM2_HUMAN	RTDALTSSPGR.2	RTDALTS[Ph]S[Ph]PGR	118333	209747	107720	53964.1	69124.8	239482	103513	192413	117006	48489.2	67767.3	261162
P49736	MCM2_HUMAN	RTDALTSSPGR.2	RTDALTS[Ph]SPGR	388446	904911	239413	175213	476373	365218	316507	641157	279931	109218	584469	448628
P49736	MCM2_HUMAN	RTDALTSSPGR.2	RTDALTSS[Ph]PGR	412987	909031	241711	173324	480339	369109	319791	646109	281600	108505	589002	450965
P49736	MCM2_HUMAN	RTDALTSSPGR.3	RTDALTS[Ph]SPGR	12149.8	12843.6	11070.2	8588.34	15834.9	17735.4	14450.9	30231.1	14227.6	4208.25	11118.7	21881
P49736	MCM2_HUMAN	TDALTSSPGR.2	TDALTS[Ph]S[Ph]PGR	5769.47	10271.8	3412.17	2726.03	5064.31	26297.3	6516.51	9404.36	4619.07	2048.09	1762.44	19048
P49736	MCM2_HUMAN	TDALTSSPGR.2	TDALTSS[Ph]PGR	22467.4	34989.6	16603.7	8471.97	41838.1	26399.9	22233.6	36254.1	15334.1	5535.68	24498.8	23556.8
P49756	RBM25_HUMAN	FEDEDSDDVPR.2	FEDEDS[Ph]DDVPR	5459.55	4322.86	4178.88	3765.95	3579.34	3005.37	4501.05	2643.46	4095.65	3434.71		5046.16
P49756	RBM25_HUMAN	LGASNSPGQPNSVK.2	LGASNS[Ph]PGQPNSVK	309857	359276	251008	222431	275642	188552	297588	382573	265271	175683	455378	175507
P49759	CLK1_HUMAN	SVEDDEEGHLICQSGDVLSAR.3	S[Ph]VEDDEEGHLIC[cam]QSGDVLSAR	10044	22919	9357.98	7271.55	12600.6	23285.7	6810.9	22580.4	6110.7	8150.88	12736.3	26148.1
P49761	CLK3_HUMAN	SHDRLPYQR.3	S[Ph]HDRLPYQR	702.874		1934.25	2042.47					2233.86	1500.59	521.016
P49761	CLK3_HUMAN	SRSHDRLPYQR.3	S[Ph]RS[Ph]HDRLPYQR	17017.1	21668.5	24028.8	33695	13452.5	36426.8	18993.9	21203.3	18680	51132.8	20497.4	63984
P49761	CLK3_HUMAN	SSRSVEDDKEGHLVCR.3	S[Ph]S[Ph]RSVEDDKEGHLVC[cam]R	6267.46	38717	5374.16	10167.7	1912.1	17590	5868.93	5769.58	4879.8	11314	6453.15
P49761	CLK3_HUMAN	SVEDDKEGHLVCR.2	S[Ph]VEDDKEGHLVC[cam]R	7816.02	12622.5	7106.61	13593.7	7393.2	8266.2	8054.64	7216.15	6497	15318.8	10175.6
P49761	CLK3_HUMAN	SVEDDKEGHLVCR.3	S[Ph]VEDDKEGHLVC[cam]R	23690.2	15951.6	28876.5	35515.9	18873	25169.4	18132.1	17880.9	25418.3	26950.8	17369.9	24617.4
P49761	CLK3_HUMAN	YRSPEPDPYLSYR.2	YRS[Ph]PEPDPYLSYR	16861.5	11291.3	24259.3	28984.9	38018.4	10697.5	12811.1	15957.2	24451.3	19638.2	24326.9	7580.47
P49761	CLK3_HUMAN	YRSPEPDPYLSYR.3	YRS[Ph]PEPDPYLSYR	37748.5	28302.5	52904.4	64777.2	65280.5	25550.3	29320.8	38779.8	50659.2	38556.7	61920.3	14661.2
P49790	NU153_HUMAN	ASDKDITVSK.2	AS[Ph]DKDITVSK	8024.13	16064.6	8721	14808.5	4908.56	19662.3	7195.92	17482.8	7074.22	14700.3	6566.8	12601.9
P49792	RBP2_HUMAN	HSTPSPTR.2	HST[Ph]PS[Ph]PTR	2358.64	772.594	4829.97	1953.33	2988.41	4148.82	2421.36	667.653	5092.68	21954.5	1494.22	3252.33
P49792	RBP2_HUMAN	HSTPSPTR.2	HSTPS[Ph]PTR	21627	9287.59	22497	19586.4	32140.8	19754.1	34862.8	13029.3	22928.2	16835	27718.1	12814.2
P49792	RBP2_HUMAN	KIESFGSPK.2	KIES[Ph]FGSPK	3848.76	748.612	5947.55	3959.93	5803.19	619.661	4035.08	963.401	4621.44	4616.56	3667.53	3131.6
P49792	RBP2_HUMAN	KIESFGSPK.2	KIESFGS[Ph]PK	2420.93		6467.83	4715.81	6663.53		5497.04	1253.24	5267.92	5715.31	4544.52
P49792	RBP2_HUMAN	KQSLPATSIPTPASFK.2	KQS[Ph]LPATSIPTPASFK	109684		89438.2	42006.7	90979.3	32782.8	68480.6	12748.8	56456	36403.6	83709.4	48328.4
P49792	RBP2_HUMAN	KQSLPATSIPTPASFK.3	KQS[Ph]LPATSIPTPASFK	36791.9	5391.4	32023.1	13831.8	31557.3	7901.84	24808.8	4099.36	18497.8	5431.03	30936.4	10197.6
P49792	RBP2_HUMAN	NHETDGGSAHGDDDDDGPHFEPVVPLPDK.4	NHETDGGS[Ph]AHGDDDDDGPHFEPVVPLPDK	190153	48688.1	144141	105295	216687	190893	197330	39692.5	132078	87019.8	269859	172091
P49792	RBP2_HUMAN	NRPDYVSEEEEDDEDFETAVK.3	NRPDYVS[Ph]EEEEDDEDFETAVK	21880	15534.4	15749.3	11094	97028.5	17129.6	24590.1	18202.4	16631.4	7558.22	65533.6	16713
P49792	RBP2_HUMAN	SGSSFVHQASFK.2	SGSSFVHQAS[Ph]FK	13018.4	6130.28	57222.9	9820.44	25669	21070.7	9439.99	10216.6	40627.7	9819.93	24367.9	25832.4
P49792	RBP2_HUMAN	SGSSFVHQASFK.3	SGSSFVHQAS[Ph]FK	847.767		3429.12		514.472	1663.82		153.706	2150.22		1440.62
P49792	RBP2_HUMAN	SISSPSVSSETMDKPVDLSTR.3	SIS[Ph]SPSVSSETMDKPVDLSTR	12317	15926.1	45893.8	18162.7	64269.2	50642.8	9528.58	12607.7	25373.3		52118.2	36991.1
P49792	RBP2_HUMAN	YIASVQGSTPSPR.2	YIASVQGS[Ph]TPS[Ph]PR	5645.34		5322.73	2863.01	2565.93		4738.83		10991.3	7450.03	3488.92
P49792;A6NKT7;P0DJD1;Q7Z3J3;P0DJD0;O14715;Q99666	RBP2_HUMAN;RGPD3_HUMAN;RGPD2_HUMAN;RGPD4_HUMAN;RGPD1_HUMAN;RGPD8_HUMAN;RGPD5_HUMAN	DSLITPHVSR.2	DSLIT[Ph]PHVS[Ph]R	46258.5	29155.7	38261.3	57223.1	44047.5	71075.5	61045.5	19424.4	53840.4	94426.5	50061.3	111908
P49792;A6NKT7;P0DJD1;Q7Z3J3;P0DJD0;O14715;Q99666	RBP2_HUMAN;RGPD3_HUMAN;RGPD2_HUMAN;RGPD4_HUMAN;RGPD1_HUMAN;RGPD8_HUMAN;RGPD5_HUMAN	DSLITPHVSR.2	DSLITPHVS[Ph]R	33452	17685.7	60527.6	34670.2	27677.4	33104.5	37614.6	26692.5	44488.9	33054.8	26282.7	30375.9
P49792;A6NKT7;P0DJD1;Q7Z3J3;P0DJD0;O14715;Q99666	RBP2_HUMAN;RGPD3_HUMAN;RGPD2_HUMAN;RGPD4_HUMAN;RGPD1_HUMAN;RGPD8_HUMAN;RGPD5_HUMAN	YSLSPSK.2	YSLS[Ph]PSK	11336.6	2881.25	21389.5	10561.6	6467.36	9498.62	16154.8	8187.01	25347.5	9282.16	3088.47
P49792;A6NKT7;Q7Z3J3;O14715;Q99666	RBP2_HUMAN;RGPD3_HUMAN;RGPD4_HUMAN;RGPD8_HUMAN;RGPD5_HUMAN	EDALDDSVSSSSVHASPLASSPVRK.3	EDALDDSVSSSSVHASPLASS[Ph]PVRK	19431	20170.8	37786.8	14034.7	49393.7	39341.3	18242.4	13264.2	39129.1	9836.49	24440.7
P49792;Q7Z3J3	RBP2_HUMAN;RGPD4_HUMAN	SALSPSKSPAK.2	SALS[Ph]PSKS[Ph]PAK	21906.6	12649.1	33369	25276.8	17152.1	26934.3	20804	12647.5	32071.3	34695.1	20799.8	41393.6
P49792;Q7Z3J3	RBP2_HUMAN;RGPD4_HUMAN	SALSPSKSPAK.2	SALSPS[Ph]KSPAK	7806.79		13980.5	8859.76	9046.96	7243.35	9298.77	5471.08	15206.9	7816.23	12516.6
P49792;Q7Z3J3	RBP2_HUMAN;RGPD4_HUMAN	SALSPSKSPAK.2	SALSPSKS[Ph]PAK	8025.1	9157.58	16154.2	9545.02	10331.6	6604.8	9594.48	6089.54	16718.3	9247.66	14240.5
P49796	RGS3_HUMAN	DLPAIQESPTR.2	DLPAIQES[Ph]PTR	2992.45		21064.6				3253.03	2557.15	21708.9		1012.38
P49796	RGS3_HUMAN	RTHSEGSLLQEPR.3	RTHS[Ph]EGSLLQEPR	10924.3		10713				715.317		8929.94		523.204
P49815	TSC2_HUMAN	SMSGGHGLR.2	SMS[Ph]GGHGLR	5569.35	15247.3	2904.95	5566.45	5063.96	8987.77	7232.32	8530.21		4499.85	6585.56	6420.55
P49840;P49841	GSK3A_HUMAN;GSK3B_HUMAN	GEPNVSYICSR.2	GEPNVS[Ph]YIC[cam]SR	797897	472547	820796	917089	1.02792e+06	693536	783474	542793	836386	1.16817e+06	894419	697055
P49840;P49841	GSK3A_HUMAN;GSK3B_HUMAN	GEPNVSYICSR.2	GEPNVSY[Ph]IC[cam]SR	521020	323430	531740	618177	725857	472339	518329	364254	572291	794425	586800	469695
P49841	GSK3B_HUMAN	TTSFAESCKPVQQPSAFGSMK.3	TTS[Ph]FAESC[cam]KPVQQPSAFGSMK	6566.58		4281.54	2157.81					2697.34
P49902	5NTC_HUMAN	NRTSVDFK.2	NRT[Ph]SVDFK	1229.11	282.516	8602.67	3458.98	241.325			784.607	10838.4	2498.14	318.029
P49915	GUAA_HUMAN	TLNMTTSPEEK.2	TLNMTTS[Ph]PEEK	15618.2		4857.95	23623.3	8676.3		15671.9	3615.4	4511.16	19453.3	4247.47
P49916	DNLI3_HUMAN	KFSGFSAKPNNSGEAPSSPTPK.3	KFSGFSAKPNNSGEAPS[Ph]SPTPK	7369.25		15245.9	25669.2	2609.03	33382.7	9468.2		15177.2	40177.4	4297.58	17528.9
P49916	DNLI3_HUMAN	KFSGFSAKPNNSGEAPSSPTPK.3	KFSGFSAKPNNSGEAPSS[Ph]PTPK	9219.05		18780.5	31327.9	4520.91	38754.2	11531.1		19406.7	50138	5379	21986.3
P49916	DNLI3_HUMAN	LTTTGQVTSPVK.2	LTTTGQVT[Ph]SPVK	8631.02	8428.96	22877.9	37797.8	5763.94	18876.9	6084.65	14844.8	27505.6	27469.3	6087.13	16199.9
P49916	DNLI3_HUMAN	LTTTGQVTSPVK.2	LTTTGQVTS[Ph]PVK	13623.6	15942.4	36217.2	59150.5	9475.19	28513.2	7756.4	25285.3	43762.7	42635.8	7704	22481.3
P50402	EMD_HUMAN	DSAYQSITHYRPVSASR.3	DSAYQSITHYRPVS[Ph]ASR	28767.6		63869	128425	11578		47915.8	42312.5	167275	219982	24263.6
P50502	F10A1_HUMAN	KVEEDLKADEPSSEESDLEIDK.3	KVEEDLKADEPS[Ph]S[Ph]EES[Ph]DLEIDK	297565	435185	280000	88939.9	462674	802825	319973	348663	224932	130617	319968	822464
P50502	F10A1_HUMAN	KVEEDLKADEPSSEESDLEIDK.3	KVEEDLKADEPS[Ph]S[Ph]EESDLEIDK	20504.5	27404.7	44081.6	10222.2	92947.3	69406.1	12348.3	14453.6	31212.8	9189.05	24026.3	66324.9
P50552	VASP_HUMAN	KVSKQEEASGGPTAPK.2	KVS[Ph]KQEEASGGPTAPK	2419.47		3062.33	1843.74	4949.35		1433.63		2138.82		3396.75
P50552	VASP_HUMAN	KVSKQEEASGGPTAPK.3	KVS[Ph]KQEEASGGPTAPK	7992.17		11581	9972.1	11348.3		6107.17		5631.45	7254.81	17633.1
P50613	CDK7_HUMAN	SFGSPNR.2	SFGS[Ph]PNR	11910.3	9850.57	19322.3	28867.8	16539	17525.5	15263.8	18971.5	16682.9	29126.9	9621.98	17703.7
P50749	RASF2_HUMAN	TRSDVGVR.2	TRS[Ph]DVGVR	9456.6	5659.21	5394.55			329.745	11401.3	7941.93	792.787	4981.57	6969.68
P50914	RL14_HUMAN	AALLKASPK.2	AALLKAS[Ph]PK	380320	72377	734122	270014	55527.5	127696	716102	164403	766741	432263	57587	90685.9
P50990	TCPQ_HUMAN	PAGGPKPPSGK.2	PAGGPKPPS[Ph]GK		3042.52	1783.4	16511.2	2697.57	2317.2		3520.64	2863.94	15452	6464.83	1180.14
P51003	PAPOA_HUMAN	TSSPHKEESPKK.2	TSS[Ph]PHKEES[Ph]PKK	1629.32	3140.03		2109.83	5134.98	4845.01	1687.76	2348.75	2672.43	4598.6	3402.26
P51003	PAPOA_HUMAN	TSSPHKEESPKK.3	TSS[Ph]PHKEES[Ph]PKK	3866.25		6396.79	2776.24	5061.71		1952.18	5978.21	13015.7	4120.73
P51114	FXR1_HUMAN	RGPNYTSGYGTNSELSNPSETESER.3	RGPNYTSGYGTNSELSNPS[Ph]ETESER	23431.3	5063.99	6815.94	39679	24177.1		30314.4	17659	11127.4	47183.6	28906.1	22775.6
P51116	FXR2_HUMAN	TDGSISGDRQPVTVADYISR.3	TDGS[Ph]IS[Ph]GDRQPVTVADYISR	202127	278452	173090	330988	145345	572180	208705	232791	143843	428379	196746	834422
P51531	SMCA2_HUMAN	AKPVVSDFDSDEEQDER.2	AKPVVS[Ph]DFDS[Ph]DEEQDER	8865.2		7845.09	16004.4	16282	33238.1	8016.98	7181.75	10153.8	20235.6	10007	45532.2
P51531	SMCA2_HUMAN	GRPPAEKLSPNPPK.3	GRPPAEKLS[Ph]PNPPK	54423.1	13310.1	76442.8	203442	80884.9	207146	92428	45118.9	107638	148812	91330.2	155381
P51532	SMCA4_HUMAN	DSDAGSSTPTTSTR.2	DSDAGSST[Ph]PTTSTR	25256.9	35387.7	17132		12793.3	10972.4	46134.3	37968.3	22252.7			19004.9
P51532	SMCA4_HUMAN	EVDYSDSLTEK.2	EVDYSDS[Ph]LTEK	8864.75	18454.8	16942.7	7893.27	11499.9		8028.54	20387.9	13732.1	4171.5
P51532	SMCA4_HUMAN	GRPPAEKLSPNPPNLTK.3	GRPPAEKLS[Ph]PNPPNLTK	318304	285993	233311	131874	57620.6	314761	317286	347756	295825	89612.5	101533	234918
P51532	SMCA4_HUMAN	GRPPAEKLSPNPPNLTK.4	GRPPAEKLS[Ph]PNPPNLTK	15211.9	14769.5	8979.41	4092.31		19687.1	14038.5	28165.6	13198.3		3667.33	10843.6
P51608	MECP2_HUMAN	AETSEGSGSAPAVPEASASPK.2	AETSEGSGSAPAVPEASAS[Ph]PK	89648.9	151495	100004	73908.1	77391.6	49321.3	77600.6	99230.4	123072	80357.5	72458.4	56393.2
P51608	MECP2_HUMAN	MPFQTSPGGK.2	MPFQTS[Ph]PGGK	8265.05	4831.7	17185.1	16356.4	3277.31		7627.82	5825.84	18086.1	18151.1	1934.14
P51608	MECP2_HUMAN	SSSASSPPKK.2	SSSAS[Ph]SPPKK	2951.51	2742.11	422.571	2875.03		12159.5	3438.91	2399.82	4027.03			426.642
P51610	HCFC1_HUMAN	RPMSSPEMK.2	RPMS[Ph]SPEMK	15462.7	11305.7	30799.8	33182.5	16083.4	20608.6	15967	22967.7	41172.6	19714.3	15334.9
P51610	HCFC1_HUMAN	VASSPVMVSNPATR.2	VAS[Ph]SPVMVSNPATR	4558.42			9591.36	5361.72		4547.81	4821.59	13705.9	17637.2	6264.49
P51659	DHB4_HUMAN	ATSTATSGFAGAIGQK.2	AT[Ph]STATSGFAGAIGQK	4337.82	2335.36	6087.72	4931.38	20538.7		2892.52	4216.57	4503.79	5470.52	21283.4
P51659	DHB4_HUMAN	ATSTATSGFAGAIGQK.2	ATS[Ph]TATSGFAGAIGQK	4652.9		9824.77	10329.7	44987.2		3919.74	7758.82	7839.92	11708.2	43957.5
P51812	KS6A3_HUMAN	NQSPVLEPVGR.2	NQS[Ph]PVLEPVGR	14992.9	25778.4	11876.2	33775.2	19037.2	43828.7	15169.3	26648.4	10606.3	41866.3	14856.1	26290.8
P51858	HDGF_HUMAN	AGDLLEDSPK.2	AGDLLEDS[Ph]PK	470024	287185	463766	354608	601604	452381	441295	362701	506269	278715	458615	562740
P51858	HDGF_HUMAN	AGDLLEDSPKRPK.2	AGDLLEDS[Ph]PKRPK	513478	748885	377573	603497	1.51258e+06	675588	613472	687558	478236	421987	1.14653e+06	567364
P51858	HDGF_HUMAN	AGDLLEDSPKRPK.3	AGDLLEDS[Ph]PKRPK	750249	626866	898582	850844	1.04041e+06	999255	1.21978e+06	1.02661e+06	936274	476285	1.08138e+06	943487
P51858	HDGF_HUMAN	GNAEGSSDEEGKLVIDEPAK.2	GNAEGS[Ph]S[Ph]DEEGKLVIDEPAK	1.85232e+06	1.76881e+06	1.27217e+06	1.0518e+06	2.14359e+06	3.5125e+06	1.69246e+06	1.45876e+06	1.00959e+06	1.15597e+06	1.42173e+06	5.17899e+06
P51858	HDGF_HUMAN	GNAEGSSDEEGKLVIDEPAK.2	GNAEGS[Ph]SDEEGKLVIDEPAK	149153	142475	150686	130580	235391	252047	135200	116730	163605	131042	142431	506058
P51858	HDGF_HUMAN	GNAEGSSDEEGKLVIDEPAK.3	GNAEGS[Ph]S[Ph]DEEGKLVIDEPAK	1.65363e+06	1.72998e+06	1.10834e+06	895372	1.81901e+06	3.44291e+06	1.4961e+06	1.5967e+06	860560	862266	1.39477e+06	5.1812e+06
P51858	HDGF_HUMAN	GNAEGSSDEEGKLVIDEPAK.3	GNAEGS[Ph]SDEEGKLVIDEPAK	179294	163000	196298	154551	183770	298445	171797	130148	188558	132908	177640	347459
P51858	HDGF_HUMAN	GNAEGSSDEEGKLVIDEPAK.3	GNAEGSS[Ph]DEEGKLVIDEPAK	179099	164525	192244	156110	182579	299863	170017	135305	187401	140401	176960	353300
P51858	HDGF_HUMAN	GNAEGSSDEEGKLVIDEPAKEK.3	GNAEGS[Ph]S[Ph]DEEGKLVIDEPAKEK	474071	519794	301268	321845	394389	802535	617054	487293	264321	522425	439770	1.30143e+06
P51858	HDGF_HUMAN	GNAEGSSDEEGKLVIDEPAKEK.3	GNAEGS[Ph]SDEEGKLVIDEPAKEK	22036.9	23424.8	25720.5	22192.5	14056.1	26009.6	26109.4	17159	21556.5	27602.9	20765.1	37769.7
P51858	HDGF_HUMAN	GNAEGSSDEEGKLVIDEPAKEK.3	GNAEGSS[Ph]DEEGKLVIDEPAKEK	23728	22193.8	25819.3	23230.4	14789.1	29598.6	28704.8	18174.2	22572.8	29479.3	22031.6	37063.7
P51858	HDGF_HUMAN	KGNAEGSSDEEGKLVIDEPAK.2	KGNAEGS[Ph]S[Ph]DEEGKLVIDEPAK	212188	279738	195169	157486	366506	528553	211413	208653	188867	162945	214599	625393
P51858	HDGF_HUMAN	KGNAEGSSDEEGKLVIDEPAK.3	KGNAEGS[Ph]S[Ph]DEEGKLVIDEPAK	847524	1.0989e+06	784365	647216	1.14568e+06	2.17341e+06	887068	831517	719618	559852	920703	2.89261e+06
P51858	HDGF_HUMAN	KGNAEGSSDEEGKLVIDEPAK.3	KGNAEGS[Ph]SDEEGKLVIDEPAK	53871.8	56986.2	88325.5	68783.6	70776.8	113418	56030.3	45674.2	91317.2	48479.8	61638.7	142906
P51858	HDGF_HUMAN	KGNAEGSSDEEGKLVIDEPAK.3	KGNAEGSS[Ph]DEEGKLVIDEPAK	56192.1	59134.6	95081.2	73397.8	73123.9	120777	60611.7	49039.6	96145.3	57018.3	68873.9	155711
P51858	HDGF_HUMAN	KGNAEGSSDEEGKLVIDEPAK.4	KGNAEGS[Ph]S[Ph]DEEGKLVIDEPAK	44177.5	54744.9	47369.2	30772.6	9159.44	146165	43673.4	67491.9	32627.5	25179.5	48170.7	166285
P51858	HDGF_HUMAN	RAGDLLEDSPK.2	RAGDLLEDS[Ph]PK	212950	159869	199201	123377	320858	190064	224665	157466	225707	69451.1	260399	202759
P51991	ROA3_HUMAN	EDSVKPGAHLTVK.2	EDS[Ph]VKPGAHLTVK	1903.64		12702.3	8454.89	2603.02			447.652	14974.5	8339.78
P51991	ROA3_HUMAN	EDSVKPGAHLTVK.3	EDS[Ph]VKPGAHLTVK	219.454		6886.97	5890.41	1390.7			425.771	9458.78	4582.37	341.253
P51991	ROA3_HUMAN	MEVKPPPGRPQPDSGR.3	[ac]MEVKPPPGRPQPDS[Ph]GR	244646	98327.2	166878	206949	29941	97231.1	212284	135330	324828	367175	56385.5	72838.2
P51991	ROA3_HUMAN	SSGSPYGGGYGSGGGSGGYGSR.2	S[Ph]SGSPYGGGYGSGGGSGGYGSR	837977	918452	421373	468401	444776	384044	867432	489860	494168	728275	306142	855541
P51991	ROA3_HUMAN	SSGSPYGGGYGSGGGSGGYGSR.2	SSGS[Ph]PYGGGYGSGGGSGGYGSR	811178	931801	411258	441884	441363	384539	784934	476340	450556	679661	287447	400117
P52272	HNRPM_HUMAN	MGANSLER.2	MGANS[Ph]LER	1660.47		3837.13	7929.42	2370.03		2254.95	1552.83	5313.83	6617.44	4032.89
P52292	IMA1_HUMAN	NVSSFPDDATSPLQENR.2	NVSSFPDDAT[Ph]SPLQENR	95291.7	26147.5	128113	199016	91510.1	53351.8	79707.4	51786.8	140103	328683	76085.7	27653.2
P52292	IMA1_HUMAN	NVSSFPDDATSPLQENR.2	NVSSFPDDATS[Ph]PLQENR	132277	37597.4	178313	269770	114426	75631.1	113943	70397.5	199308	447986	106174	50964.4
P52594	AGFG1_HUMAN	GTPSQSPVVGR.2	GT[Ph]PSQS[Ph]PVVGR	10232.1	7972.55	3353.19	7236.7	38553.3	19323.5	15018.6	6977.8	3523.63		29878.2	37171.1
P52594	AGFG1_HUMAN	GTPSQSPVVGR.2	GTPSQS[Ph]PVVGR	41459.9	46290.9	18420.4	56181.4	72283.9	37012.7	38082.6	56490.6	13350.2	43013.9	83657.5
P52594	AGFG1_HUMAN	SLLGDSAPTLHLNKGTPSQSPVVGR.3	SLLGDSAPTLHLNKGT[Ph]PSQS[Ph]PVVGR	44804.9	28321.9	6349.28	16144.8	34697.1	43317.5	61805.9	17765.8	9511.18	44698.7	45422.9	56482.9
P52701	MSH6_HUMAN	IHNVGSPLK.2	IHNVGS[Ph]PLK	7586.98	3375.82	14678.7	15505.1	5003.24	7826.97	9510.77	4641.93	17355.6	10583.3	3120.91
P52701	MSH6_HUMAN	SEEDNEIESEEEVQPK.2	SEEDNEIES[Ph]EEEVQPK	42503.2	50336.4	40402.8	22793.5	59396.7	64470.1	39709.9	35568.8	41391.4	19975.2	42521.6	42947.6
P52701	MSH6_HUMAN	SPALSDANK.2	S[Ph]PALSDANK	6498.18	4791.21	5016.24	2239.11	2306.46	7633.72	5541.05	5040.38	9022.38	2944.47	1442.19	5552.94
P52701	MSH6_HUMAN	VHVQFFDDSPTR.2	VHVQFFDDS[Ph]PTR	50608	13435.7	32229	22109.8	28293	22713.2	51829.6	12807.7	32991.4	13943.1	19739	20022.9
P52756	RBM5_HUMAN	DYDSPERER.2	DYDS[Ph]PERER	10052	10025.2	5413.92	2472.7	14222.7	5034.29	9820.68	8562.36	4519.89		11832.1	4716.27
P52756	RBM5_HUMAN	GLVAAYSGDSDNEEELVER.2	GLVAAYS[Ph]GDSDNEEELVER	160067	172226	131279	64308.9	242005	163901	185168	150957	123343	70601	165480	191593
P52756	RBM5_HUMAN	GLVAAYSGDSDNEEELVER.2	GLVAAYSGDS[Ph]DNEEELVER	297921	330045	245581	124645	465110	295416	353795	283232	232903	130640	310289	347870
P52948	NUP98_HUMAN	ADTSQEICSPR.2	ADTSQEIC[cam]S[Ph]PR	5003.85	2189.4	3950.13	3487.73	8433.18	3215.57	4835.56	2816.98	3821.07	3949.32	10055.8
P52948	NUP98_HUMAN	DSENLASPSEYPENGER.2	DSENLAS[Ph]PSEYPENGER	80437.2	213383	136573	178291	299517	202850	83739.5	165786	175879	255388	184735	191003
P52948	NUP98_HUMAN	NLNNSNLFSPVNR.2	NLNNS[Ph]NLFSPVNR	35668.8	54013.7	75193.5	69551.6	62455.6	49390.2	47607.7	53043.6	74626.5	64542	59544.7	58011
P52948	NUP98_HUMAN	NLNNSNLFSPVNR.2	NLNNSNLFS[Ph]PVNR	22960.9	52865.1	52706.7	43721	40607.7	42822.6	26207.5	52714.8	52060.3	43645.9	41229.5	39251.4
P52948	NUP98_HUMAN	YGLQDSDEEEEEHPSK.2	YGLQDS[Ph]DEEEEEHPSK	81975.4	121072	57791.1	50000.7	127711	53141.6	58195.4	64498.3	70747.2	57932.5	110257	52855.3
P52948	NUP98_HUMAN	YGLQDSDEEEEEHPSK.3	YGLQDS[Ph]DEEEEEHPSK	92609.1	92645.4	89051.2	83080.8	150618	82538.1	82159.5	78545.3	95771.9	75703.4	128917	74349.3
P53350	PLK1_HUMAN	KKTLCGTPNYIAPEVLSK.3	KKT[Ph]LC[cam]GTPNYIAPEVLSK	14982.1		16522.3	23524.6	17651.9		12121.5	11514.1	20721.7	30345.4	16947.2
P53396	ACLY_HUMAN	AKPAMPQDSVPSPR.2	AKPAMPQDSVPS[Ph]PR	211018	88356	77156.3	104068	333490	103618	176798	79926.1	98071	89689.1	402804	86269.6
P53396	ACLY_HUMAN	AKPAMPQDSVPSPR.3	AKPAMPQDSVPS[Ph]PR	129011	42487.4	66113.9	75443.2	187708	91446.4	155201	72962.9	54342.7	57062.6	230863	85157.4
P53396	ACLY_HUMAN	TASFSESR.2	TAS[Ph]FSESR	67663.4	3661.33	53143.8	19698.8	40947.8	22090.2	40076.7	4122.85	26222.5	16087.2	18089.3	10913.5
P53602	MVD1_HUMAN	NSRDGDPLPSSLSCK.3	NS[Ph]RDGDPLPSSLSC[cam]K	11220.6	8716.45	9001.32	10491.4	16364.2	2834.65	12300.2	8230.58	8961.94	9028.42	18038.4
P53602	MVD1_HUMAN	RNSRDGDPLPSSLSCK.3	RNS[Ph]RDGDPLPSSLSC[cam]K	40806.7	21681.9	30415.8	30747.7	34629.6		52466.3	28311.8	35582.7	40005.3	60029.4
P53611	PGTB2_HUMAN	GTPQKDVIIK.2	[ac]GT[Ph]PQKDVIIK	3288.65		1846.33	10282.7	3692.28	1841.16	4240.75	613.467	3634.24	11672.6	7964.77
P53621	COPA_HUMAN	NLSPGAVESDVR.2	NLS[Ph]PGAVESDVR	37711.9	26821.2	41949	111975	36254.2	24719.8	41495.2	32867	54448.9	160073	31700.3
P53985	MOT1_HUMAN	DTDGGPKEEESPV.2	DTDGGPKEEES[Ph]PV	3787.52	3866.65	2073.48	4226.48		3799.69	3511.77	3868.75		5004.96	768.898	3687.07
P53985	MOT1_HUMAN	ESKEEETSIDVAGKPNEVTK.3	ESKEEET[Ph]SIDVAGKPNEVTK	22422.4	8303.52	7764.07	17925.5	12053.2	10865.1	21151	13158.6	12468	14205.4	10733	16087.9
P53999	TCP4_HUMAN	EQISDIDDAVR.2	EQIS[Ph]DIDDAVR	3505.3	10580.4	777.117	4602.89	21472.9	17209.5	4807.34	11968.4	4819.47	3236.01	31481	11540.8
P54105	ICLN_HUMAN	FEEESKEPVADEEEEDSDDDVEPITEFR.3	FEEESKEPVADEEEEDS[Ph]DDDVEPITEFR	2.87393e+06	2.50741e+06	2.74353e+06	3.76957e+06	3.7421e+06	2.97202e+06	2.7843e+06	2.09004e+06	2.71222e+06	4.95799e+06	2.57557e+06	3.303e+06
P54132	BLM_HUMAN	DLDTSDRKEDVLSTSK.3	DLDT[Ph]SDRKEDVLSTSK	3438.23		6634.5	7141.64	1499.2	1449.13			4261.85	5090.1	1693.76
P54274	TERF1_HUMAN	AEDVSSAAPSPR.2	[ac]AEDVSSAAPS[Ph]PR	16263.2	19770.3	10042.4	15239.3	28959.6	16051.1	22425.1	20266.3	6933.91	8793.9	18127.5
P54578	UBP14_HUMAN	ASGEMASAQYITAALR.2	AS[Ph]GEMASAQYITAALR		1647.22	33328.8	1348.15	13648			1646.2	44999		8880.89
P54725	RD23A_HUMAN	EDKSPSEESAPTTSPESVSGSVPSSGSSGR.3	EDKS[Ph]PSEESAPTTSPESVSGSVPSSGSSGR	122805	235321	89850.6	113420	145303	113155	91910.7	197569	94736.5	90443.7	100481	138622
P55081	MFAP1_HUMAN	EDSSEEEEEEIDDEEIER.2	EDS[Ph]S[Ph]EEEEEEIDDEEIER	48201.5	76662.2	52374.4	62959.1	80360.6	78235.2	54736.8	65483.6	50693.5	50877.8	37748.5	114180
P55081	MFAP1_HUMAN	IVEPEVVGESDSEVEGDAWR.2	IVEPEVVGES[Ph]DS[Ph]EVEGDAWR	339089	366609	410548	355084	214487	814511	446646	372757	380949	421018	332535	890306
P55081	MFAP1_HUMAN	IVEPEVVGESDSEVEGDAWR.3	IVEPEVVGES[Ph]DS[Ph]EVEGDAWR	201505	167064	180879	185844	78515.4	342771	213414	190462	164085	165724	178119	363605
P55081	MFAP1_HUMAN	KIVEPEVVGESDSEVEGDAWR.3	KIVEPEVVGES[Ph]DS[Ph]EVEGDAWR	135403	143684	105084	124817	65828.8	190429	138160	158248	79514.5	173965	119712	232218
P55081	MFAP1_HUMAN	RPDYAPMESSDEEDEEFQFIKK.3	RPDYAPMES[Ph]S[Ph]DEEDEEFQFIKK	102968	20202.6	102835	75831.2		126669	134026	30015.9	66892.5	162582	26118	251888
P55196	AFAD_HUMAN	SQEELREDK.2	S[Ph]QEELREDK	9792.18	12598.1	4358.5	15284.3	13451.5	9747.45	11182.2	13371.9	4097.79	16874.2	15744.3	9153.15
P55196	AFAD_HUMAN	SSPNVANQPPSPGGK.2	SS[Ph]PNVANQPPS[Ph]PGGK	38044.9	52859.8	14995	27929.1	44541.2	44348.3	27032.4	55866.3		37938.3	42246.2	61410.9
P55196	AFAD_HUMAN	TSSVVTLEVAK.2	TSS[Ph]VVTLEVAK	10901.5	7098.96		11099.1	16977.9		14288.2	8216.22	3064.8	8745.33	13018.2
P55199	ELL_HUMAN	SASPPQKR.2	SAS[Ph]PPQKR	1738.09	3016.48	2176.47	3134.52	13895.5			3180.31	2494.83	34110.9	14630.4
P55327	TPD52_HUMAN	KLEDVKNSPTFK.2	KLEDVKNS[Ph]PTFK	17991.3		6026.44	7617.83		28698.3	14221.5		8807.72	13565.4	10170.1	3590.44
P55327	TPD52_HUMAN	KLEDVKNSPTFK.3	KLEDVKNS[Ph]PTFK	24295.6		9929.59	9530.72		35618.8	27969.7	3162.35	16784	12654.1	3091.98
P55327	TPD52_HUMAN	NSPTFKSFEEK.2	NSPTFKS[Ph]FEEK	35204	16344.5	40857	8555.95	12907.1	36804.1	32927.4	6649.5	12102.5	3307.76	5654.48	11623.7
P55327	TPD52_HUMAN	SFEEKVENLK.2	S[Ph]FEEKVENLK	9330.23	759.348	10072.1	1798.36		8104.05	12722.8	1308.84	2931.58		362.69
P56192	SYMC_HUMAN	TSPKPAVVETVTTAK.2	T[Ph]SPKPAVVETVTTAK	9264.76	10293	11203.4	15697.3	15291.5	17455.6	8999.58	9411.87	11641.3	12391.3	13530.4	13226.3
P56211	ARP19_HUMAN	EMEDKVTSPEKAEEAK.3	EMEDKVT[Ph]SPEKAEEAK	3365.24	1100.67	6518.04	6985.5	3854.57	4167.71		2436.86	5961.7	4671.21	3573.53	4481.83
P56211	ARP19_HUMAN	KPSLVASK.2	KPS[Ph]LVASK	11939.7		42850.1	1636.66	3369	4921.6	9319.51	508.769	29210.5		2289.28
P56211	ARP19_HUMAN	VTSPEKAEEAK.2	VTS[Ph]PEKAEEAK	8918.89	10864.5	16338.6	25342.8	11389.9	4357	5411.15	7989.8	20898	16686.9	15041.8	2107.72
P56211;O43768	ARP19_HUMAN;ENSA_HUMAN	YFDSGDYNMAK.2	YFDS[Ph]GDYNM[ox]AK	4108.94	3687.2	7554.68	4435.29	18212.5		4908.73	2479.79	8789.92	7227.6	4581.95
P56211;O43768	ARP19_HUMAN;ENSA_HUMAN	YFDSGDYNMAK.2	YFDS[Ph]GDYNMAK	51310	40839.9	80366.8	63919.8	55089.3	41199.8	52192.6	66734.9	112649	85781.2	50190.2	37871
P57081	WDR4_HUMAN	RRSPPPGPDGHAK.3	RRS[Ph]PPPGPDGHAK	8419.07		3664.62	7882.16	15397.2		7280.95	4567.66		7341.51	4295.51
P57737	CORO7_HUMAN	RESWISDIR.2	RES[Ph]WISDIR	6910.6	4203.02	10104	2876.66	1822.68		7150.28	1242.79	14929.2	4693.35	3754.43	14533.4
P57740	NU107_HUMAN	SGFGEISSPVIR.2	SGFGEISS[Ph]PVIR	6611.52		4929.27	12948	6956.42		5261.55		16624.1	14727	7410.11
P60174	TPIS_HUMAN	KQSLGELIGTLNAAK.2	KQS[Ph]LGELIGTLNAAK	35070.2	75104.8	52804.4	29500.7	114482	65962.3	34335.7	64468.5	69064.6	37192.6	44140.8	77374.1
P60174	TPIS_HUMAN	KQSLGELIGTLNAAK.3	KQS[Ph]LGELIGTLNAAK	56208.4	104101	71855	38469.8	144271	97137.9	48104	88751.9	86982.6	43456.3	54948.9	123358
P60468	SC61B_HUMAN	PGPTPSGTNVGSSGRSPSK.2	PGPTPSGT[Ph]NVGSSGRSPSK	70113.4	91790.3	40818.4	134731	47065.4	37421.5	65627.5	92716.7	69199.1	153022	95823.9	38995.1
P60468	SC61B_HUMAN	PGPTPSGTNVGSSGRSPSK.2	PGPTPSGTNVGS[Ph]SGRSPSK	66779.6	88945.4	39034.8	127902	45290.1	37393.2	62093.8	72856.6	65617.2	145450	91490	40332.9
P60468	SC61B_HUMAN	PGPTPSGTNVGSSGRSPSK.2	PGPTPSGTNVGSSGRS[Ph]PSK	78344.3	105234	46668.1	149754	52907.6	46910.5	75090.5	86416	77442.2	170688	106689	48051
P60468	SC61B_HUMAN	PGPTPSGTNVGSSGRSPSK.3	PGPTPSGTNVGS[Ph]SGRSPSK	173763	170785	132609	356768	120805	130892	190400	223392	195649	377405	229210	146564
P60468	SC61B_HUMAN	PGPTPSGTNVGSSGRSPSK.3	PGPTPSGTNVGSS[Ph]GRSPSK	176791	170134	133155	355648	124082	129409	190776	223016	195313	379519	233106	145762
P60468	SC61B_HUMAN	PGPTPSGTNVGSSGRSPSK.3	PGPTPSGTNVGSSGRS[Ph]PSK	183058	177704	139968	372936	127531	137382	199570	233825	200571	398858	247835	152664
P60981	DEST_HUMAN	ASGVQVADEVCR.2	[ac]AS[Ph]GVQVADEVC[cam]R	44640.4	45438		199583	280427	94292.5	66785.1	64427.3	3453.69	337983	359184	161593
P61073	CXCR4_HUMAN	GGHSSVSTESESSSFHSS.2	GGHSSVSTESESSSFHS[Ph]S		19761.5			6863.12	14755.1		18761.4			8907.88	28519.6
P61073	CXCR4_HUMAN	GGHSSVSTESESSSFHSS.3	GGHSS[Ph]VSTESESSSFHSS					1895.29	3984.31		3323.51			1414.69	5714.23
P61073	CXCR4_HUMAN	RGGHSSVSTESESSSFHSS.3	RGGHSSVSTESESSSFHS[Ph]S		5512.77				6372.03		7141.74			2496.22	9498.09
P61073	CXCR4_HUMAN	TSAQHALTSVSR.2	TSAQHALT[Ph]SVSR	1665.67	83160.7	1195.78		11540.2	65695.1		83725.6			12318.6	114783
P61073	CXCR4_HUMAN	TSAQHALTSVSR.2	TSAQHALTS[Ph]VSR		64423.6			8337.57	48366.4	1923.57	65352.1			38269.6	86315.6
P61073	CXCR4_HUMAN	TSAQHALTSVSR.3	TSAQHALT[Ph]SVSR		530.664	55.5074			6380.53		1827.39			1208.65	10260.2
P61073	CXCR4_HUMAN	TSAQHALTSVSR.3	TSAQHALTS[Ph]VSR		1180.01				6843.67		4046.71			1325.32
P61073	CXCR4_HUMAN	TSAQHALTSVSRGSSLK.2	TSAQHALTSVS[Ph]RGS[Ph]SLK	2255.63	5659.61	1495.86	2410.87	1910.86	13450	2218.36	5415.82			2809.65	25878.5
P61073	CXCR4_HUMAN	TSAQHALTSVSRGSSLK.2	TSAQHALTSVSRGS[Ph]S[Ph]LK	2624.6	13433.4		3266.4	6129.66	29901.6	6620.47	9895.13				60217.7
P61073	CXCR4_HUMAN	TSAQHALTSVSRGSSLK.3	TSAQHALTS[Ph]VS[Ph]RGSSLK		3454.62	1953.83		6285.37	16735.7		6338.54	1528.94		5354.93	30570.3
P61073	CXCR4_HUMAN	TSAQHALTSVSRGSSLK.3	TSAQHALTSVSRGS[Ph]S[Ph]LK		4109.91	621.513	1138.66	5877.27	20280.9		6699.07			6309.66	33206.6
P61244	MAX_HUMAN	SDNDDIEVESDEEQPR.2	[ac]S[Ph]DNDDIEVES[Ph]DEEQPR	247355	236834	289271	177543	309183	146269	234381	193126	250665	208781	171676	269455
P61978	HNRPK_HUMAN	DYDDMSPR.2	DYDDM[ox]S[Ph]PR	10957.3	8094.06	10274	6643.25	40121.5	8317.64	7058.71	8666.45	9058.21	11436.1	10115.9	10396.9
P61978	HNRPK_HUMAN	DYDDMSPR.2	DYDDMS[Ph]PR	579079	232397	739942	465998	833237	495475	649158	355476	647628	517538	383136	523326
P61978	HNRPK_HUMAN	GSYGDLGGPIITTQVTIPK.2	GS[Ph]YGDLGGPIITTQVTIPK	115252	40571.1	121080	54927.8	226247	103725	90880.1	37494.6	98326.1	99640.9	99341.7	62382.3
P61978	HNRPK_HUMAN	RDYDDMSPR.2	RDYDDMS[Ph]PR	190084	78540.5	176786	157549	230220	110731	161103	127447	218073	170425	195524	122730
P62070	RRAS2_HUMAN	FQEQECPPSPEPTR.2	FQEQEC[cam]PPS[Ph]PEPTR	13257.3	10097.3	5693.6	22282.5	10319		11643.3	8856.43	7124.59	16290.7	10702.6
P62070	RRAS2_HUMAN	FQEQECPPSPEPTRK.3	FQEQEC[cam]PPS[Ph]PEPTRK	6156.73	3260.39	2377.65	10251.8	4448.66		4260.47	3347.26	3316.22	10771.3	6074.32
P62070	RRAS2_HUMAN	KFQEQECPPSPEPTR.2	KFQEQEC[cam]PPS[Ph]PEPTR	11406.9		5066.2	40686.6			17686.3	30537.3	10117.8		69348.6
P62070	RRAS2_HUMAN	KFQEQECPPSPEPTRK.3	KFQEQEC[cam]PPS[Ph]PEPTRK	34680.7	6426.42	47692.6	88084.5	14742.9		56732.9		57433.7	62869.6	74865
P62256	UBE2H_HUMAN	SSPSPGKR.2	[ac]SS[Ph]PSPGKR	8222.81		1372.08	905.539			9420.86	1586.59	1970.84	10010.6	1033.58
P62328	TYB4_HUMAN	KTETQEKNPLPSK.3	KTET[Ph]QEKNPLPSK	12238.7	14672.8	18185	14800.8	4334.57	27573.6	11108.8	12639.4	15238.5	18520.4	4127.49	20446.4
P62328	TYB4_HUMAN	SDKPDMAEIEK.2	[ac]S[Ph]DKPDM[ox]AEIEK	30527.1	55755.4	31506.7	34833.4	31139.8		27447.3	34698.3	25895.1	36817.3	49409.5
P62328	TYB4_HUMAN	SDKPDMAEIEK.2	[ac]S[Ph]DKPDMAEIEK	488930	703207	446158	551390	182370	95519.8	503249	740130	510176	490603	237187	143364
P62328	TYB4_HUMAN	SDKPDMAEIEKFDK.2	[ac]S[Ph]DKPDMAEIEKFDK	62217	65965.9	46012	48997.9	15725.2		76383.4	72144.9	43967.1	90608.5	28493.2
P62328	TYB4_HUMAN	SDKPDMAEIEKFDK.3	[ac]S[Ph]DKPDMAEIEKFDK	99786.5	115068	69482.1	76590.1	14888		115858	125911	62442	125985	46272.3
P62328	TYB4_HUMAN	TETQEKNPLPSK.2	TET[Ph]QEKNPLPSK	18328.2	19778.5	17257.4	15991.9	6122.48		15850.6	18045.8	20063	22564	7213.84
P62736;P60709;P68032;P63261;P63267;P68133	ACTA_HUMAN;ACTB_HUMAN;ACTC_HUMAN;ACTG_HUMAN;ACTH_HUMAN;ACTS_HUMAN	EITALAPSTMK.2	EIT[Ph]ALAPSTMK	11773.6	11354.4	13750.2	9741.36	7805		14030	9484.68	13818	11018.3	10070.9
P62750	RL23A_HUMAN	IRTSPTFR.2	IRT[Ph]SPTFR	21654	17470.8	18653.6	21007.5	22469.3	16832.4	24408	35130.5	25005	23472.9	30210.8	25782.4
P62750	RL23A_HUMAN	IRTSPTFR.2	IRTS[Ph]PTFR	21606.2	17469	18275.1	20579.8	21962.5	17125.8	22129.3	32471.7	24022.8	22496.7	29132	27773.4
P62753	RS6_HUMAN	LSSLRASTSK.2	LSS[Ph]LRAS[Ph]TSK	17493.7	17475.3	29577.1	19746.6	7109.21	19131.2				3007.53
P62753	RS6_HUMAN	RLSSLRASTSK.2	RLS[Ph]S[Ph]LRAS[Ph]TSK	8381.34	51450.4	19933.1	31907.9	6100.84	4982.04				2758.55
P62805	H4_HUMAN	RISGLIYEETR.2	RIS[Ph]GLIYEETR	3932.68		35378.7	2156.6	1477.18		3420.04	4382.14	30419.5	4037.63	1461.16
P62826	RAN_HUMAN	AKSIVFHR.2	AKS[Ph]IVFHR	1218.46	1377.49	9776.48	3814.1	6681.28	5069.26	905.062	2203.11	8530.59	4039.48	3144.93
P62826	RAN_HUMAN	SIVFHR.2	S[Ph]IVFHR	952.301	1592.74	6701.89	2763.28	2353.33	3032.84	1208	1853.46	9969.74	4311.72	3163.8
P62888	RL30_HUMAN	SLESINSR.2	S[Ph]LESINSR	11928.1	4659.01	20695.8	17536	16418.8	13383.4	16288.4	12317.6	25935.5	12884	12574.5	18045.5
P62995	TRA2B_HUMAN	HSHSHSPMSTR.2	HSHSHS[Ph]PMSTR		6251.86	4871.42	5527.38	3201.2				4557.62	6979.22	1556.41
P62995	TRA2B_HUMAN	HSHSHSPMSTR.3	HSHS[Ph]HS[Ph]PMSTR	1856.49	4950.31	10125.7	5339.07	3816.52	4747.22	2514.52	7173.25	10621.7	5682.27	5269.64	10032.9
P62995	TRA2B_HUMAN	HSHSHSPMSTR.3	HSHS[Ph]HSPMSTR	45658		45192.2	9263.39	31511.9		46325.9	68021	46490.6	17546.1	14695.8
P62995	TRA2B_HUMAN	HSHSHSPMSTR.3	HSHSHS[Ph]PMSTR	18568.5	22550.9	21226.6	6480.43	11563.3		18780.6	27300.2	21117.5	23889.1	7745.32
P62995	TRA2B_HUMAN	HYTRSR.2	HYT[Ph]RS[Ph]R	114.338	3407.5	1099.82	7.23027					227.441		93.6063
P62995	TRA2B_HUMAN	HYTRSRSR.2	HYT[Ph]RS[Ph]RS[Ph]R	395.973	125.243			598.438			891.402	353.446
P62995	TRA2B_HUMAN	RHSHSHSPMSTR.2	RHS[Ph]HS[Ph]HS[Ph]PMSTR	41580.9	107341	46672.1	45981.3	68569.9	115160	43842.5	64822.5	43182	54445.2	62586.2	138594
P62995	TRA2B_HUMAN	RHSHSHSPMSTR.2	RHS[Ph]HS[Ph]HSPMS[Ph]TR	27267.4	67235.8	31568	31057.3	45163.6	73910.2	29378.2	42212	28717.4	31337.6	41751.1	89951.5
P62995	TRA2B_HUMAN	RHSHSHSPMSTR.2	RHS[Ph]HSHS[Ph]PMS[Ph]TR	22228.8	54511.9	24449	22855.2	36964.9	61983.1	23752.5	34531.3	23019.2	28072.5	32309.8	73702.8
P62995	TRA2B_HUMAN	RHSHSHSPMSTR.3	RHS[Ph]HS[Ph]HS[Ph]PMSTR	146075	269540	177625	148562	195065	336295	169798	304827	141912	146268	223439	432507
P62995	TRA2B_HUMAN	RHSHSHSPMSTR.3	RHS[Ph]HS[Ph]HSPMS[Ph]TR	84408.5	146185	96856.1	96559.3	102437	183829	103546	181036	78679.3	90356.9	147234	228755
P62995	TRA2B_HUMAN	RHSHSHSPMSTR.3	RHS[Ph]HSHS[Ph]PMSTR	6375.69	10924.1	7677.73	7499.24		19441.6	9527.73	12481.6	7719.18	7180.49	9052.43	27999.9
P62995	TRA2B_HUMAN	RHSHSHSPMSTR.3	RHSHS[Ph]HS[Ph]PMSTR	6362.53	10345.2	7296.14	4441.37	11813.9		7726.81	8719.22	6011.81	6486.79	6593.8
P62995	TRA2B_HUMAN	RHSHSHSPMSTR.4	RHS[Ph]HS[Ph]HS[Ph]PMSTR	15205.2	11667.7	24349.2	20191.7	24425.7	47057.7	20429	43610	22166.1	19518	12537.7	55884.7
P62995	TRA2B_HUMAN	RPHTPTPGIYMGR.2	RPHT[Ph]PTPGIYMGR	105184	96566	118571	129939	234367	81553.9	85464.6	100010	154190	86689.6	131218	81300.9
P62995	TRA2B_HUMAN	RPHTPTPGIYMGR.3	RPHT[Ph]PTPGIYM[ox]GR	33356.6	30294	51353.8	47624.3	170330	50754.6	25577.9	50284.4	48897	18340.1	49374.6	49121.2
P62995	TRA2B_HUMAN	RPHTPTPGIYMGR.3	RPHT[Ph]PTPGIYMGR	485713	407117	734328	686688	646208	534525	449772	537186	787897	375486	590100	463819
P62995	TRA2B_HUMAN	RPHTPTPGIYMGRPTYGSSR.4	RPHT[Ph]PTPGIYM[ox]GRPTYGSSR	27278.1	23064.3	22121.7	15628.7	33032.3		44089.9	43104.7	18480.9	19589.7	32068.4	28998
P62995	TRA2B_HUMAN	RPHTPTPGIYMGRPTYGSSR.4	RPHT[Ph]PTPGIYMGRPTYGSSR	489737	319993	203256	295098	169647	204228	600064	526019	218025	425366	336730	293613
P62995	TRA2B_HUMAN	RRHSHSHSPMSTR.3	RRHS[Ph]HS[Ph]HS[Ph]PMSTR	32724.6	93399.6	19314.8	24693.2		91798.5	32390.2	49216.3	17189.9	41307.3	33053.7	71434
P62995	TRA2B_HUMAN	RRHSHSHSPMSTR.3	RRHS[Ph]HS[Ph]HSPMS[Ph]TR	8955.02	28506.5	5161.02	5787.2	19278.7	30788.2	9174.24	13558.1	4464.49	12118.6	9384.37	4442.86
P62995	TRA2B_HUMAN	RRHSHSHSPMSTR.4	RRHS[Ph]HS[Ph]HS[Ph]PMSTR	45787.8	47069.2	45456.1	44598.3		127562	45390.4	67185.1	50790.9	53909.1	30583
P62995	TRA2B_HUMAN	SARHTPAR.2	S[Ph]ARHT[Ph]PAR	4189.46	26784	19946.3	116.706		70098.2		1238.38	8276.68			41411.5
P62995	TRA2B_HUMAN	SDSGEQNYGER.2	[ac]S[Ph]DSGEQNYGER	52676.9	138922	47985.5	46742.9	133393	39666.7	40395.4	76073.4	37583.4	43427.3	84925.8	56716.2
P62995	TRA2B_HUMAN	SDSGEQNYGERESR.2	[ac]S[Ph]DSGEQNYGERES[Ph]R	54936.8	124756	50090.2	1177.15	99143	76327.6			53807.4	2051.22	1376.74	109099
P62995	TRA2B_HUMAN	SDSGEQNYGERESR.2	[ac]SDSGEQNYGERES[Ph]R	69218.7	48946.5	54770	71491.3	37394.4	15193.1	63476.5	84239.3	66112.7	78493.9	99367.5	16051
P62995	TRA2B_HUMAN	SGSAHGSGKSARHTPAR.3	SGS[Ph]AHGS[Ph]GKS[Ph]ARHT[Ph]PAR	11191.8	1005.46	14969.7	19580.5	28483.1	5901.98	12442.9	10199.7	15875.9	47648.8	31163.7	12766
P62995	TRA2B_HUMAN	SRSYSRDYR.3	S[Ph]RS[Ph]YS[Ph]RDYR	4470.25	6518.53	2513.01	2867.53	5771.8	10266.6	3658.89	5745.43	2735.76	2811.58	1358.29	12683.2
P62995	TRA2B_HUMAN	SYSRDYR.2	S[Ph]YS[Ph]RDYR	3706.98	4911.14	2734.64	2411.96	5669.98	10634.1	2622.03	4048.52	1899.58	3297.8	2440.86	6266.06
P63165	SUMO1_HUMAN	SDQEAKPSTEDLGDK.2	[ac]S[Ph]DQEAKPSTEDLGDK	249189	445974	161336	131671	176442	162402	182602	196263	221438	149995	158655	171113
P63165	SUMO1_HUMAN	SDQEAKPSTEDLGDKK.2	[ac]S[Ph]DQEAKPSTEDLGDKK	987384	1.67338e+06	820003	902326	691597	693929	1.18273e+06	900297	841470	1.21171e+06	1.15712e+06	796438
P63165	SUMO1_HUMAN	SDQEAKPSTEDLGDKK.3	[ac]S[Ph]DQEAKPSTEDLGDKK	680846	814101	744679	472048	530470	547412	856088	558051	590797	599063	570151	584695
P63165	SUMO1_HUMAN	SDQEAKPSTEDLGDKK.3	S[Ph]DQEAKPSTEDLGDKK	11911.5	7999.98	8985.04	10017.7	3628.51	5265.03	12252.9	11598.3	10701.1	16852.1	10486.2	6134.12
P63208	SKP1_HUMAN	GKTPEEIRK.2	GKT[Ph]PEEIRK	12702.8	2544.68		22502.1	14345	8551.59	12914.6	4140.74	976.94	19574.8	11484.6	6478.93
P67809	YBOX1_HUMAN	AADPPAENSSAPEAEQGGAE.2	AADPPAENSS[Ph]APEAEQGGAE	38087.9	82499	61187.6	41550.2	56123.6	49288.5	45588.1	55741	49793.1	56229.5	57216.5	51742.6
P67809	YBOX1_HUMAN	NEGSESAPEGQAQQR.2	NEGS[Ph]ESAPEGQAQQR	34341.2	54477.4	43642.8	40780.3	46241.8	51182.4	30914.4	32701.6	52451.6	41178	41104	38094.9
P67809	YBOX1_HUMAN	NYQQNYQNSESGEKNEGSESAPEGQAQQR.3	NYQQNYQNS[Ph]ESGEKNEGSESAPEGQAQQR	99280.5	250423	175810	129366	237352	98685.1	117039	142279	133195	177001	169815	161895
P68402	PA1B2_HUMAN	SQGDSNPAAIPHAAEDIQGDDR.3	[ac]S[Ph]QGDSNPAAIPHAAEDIQGDDR	5451.53		10885.8	22385.6	12890.9		6437.1	6205.25	12484.3	29374.3	9799.75
P78316	NOP14_HUMAN	FGEYNSNMSPEEK.2	FGEYNSNMS[Ph]PEEK			13239.8	22781.7	11281.8	5807.85		7472.3	15512.2	20742.4	16207.6
P78317	RNF4_HUMAN	RLPQDHADSCVVSSDDEELSR.3	RLPQDHADSC[cam]VVS[Ph]S[Ph]DDEELSR	41160	80900.5	52761.1	63952.7	11190	84267.1	46956.1	64854.2	59636.2	71958.4	35436.5	77285.5
P78332	RBM6_HUMAN	KEESPPPPK.2	KEES[Ph]PPPPK	107075	66133.5	104224	90611.7	103462	64070.5	131737	73153.4	127815	90112.5	126365	71932.6
P78332	RBM6_HUMAN	LQSFDSPER.2	LQSFDS[Ph]PER	10411	7503.29	11551.3	5446.62	25223.9	7701.24	10741.8	10788.7	10566.3	4208.33	13705
P78344	IF4G2_HUMAN	FSPTMGR.2	FS[Ph]PTMGR	30809.6	21177.2	18646.7	36688.9	42655.2	41363.2	27527.8	29326.5	16208.3	25533.9	33238.5	24315.3
P78344	IF4G2_HUMAN	TQTPPLGQTPQLGLK.2	TQT[Ph]PPLGQTPQLGLK	34358.1	29677	16867.2	40991.2	30535.9	17186.7	32820.2	29073.5	20601.3	29594.7	39747.4
P78347	GTF2I_HUMAN	ESTSSKSPPR.2	EST[Ph]SSKSPPR	115018	59704.5	70975.8	76606.9	48409.7	49385.8	121234	92580.8	75510.7	89888.9	62182.6	55727.8
P78347	GTF2I_HUMAN	ESTSSKSPPR.2	ESTS[Ph]SKSPPR	322058	130469	178892	216781	152962	116361	319295	227880	185861	258541	217440	119176
P78347	GTF2I_HUMAN	ESTSSKSPPR.2	ESTSS[Ph]KSPPR	99000.9	48831.4	57274.9	66808.9	42706.3	42319.8	101989	76271.4	72363	71723.1	53174.1	45295.9
P78347	GTF2I_HUMAN	ESTSSKSPPR.2	ESTSSKS[Ph]PPR	139981	71612.5	86523.9	92220.9	59715.1	58929.1	144433	112431	104866	105271	75409.9	64570.5
P78347	GTF2I_HUMAN	ESTSSKSPPRK.2	EST[Ph]SSKSPPRK	36647.5	22017.2	22469.9	18393.8	9489.34	20109.2	32965.5	28457.3	42885	46484.8	17441.5	15126
P78347	GTF2I_HUMAN	ESTSSKSPPRK.2	ESTSSKS[Ph]PPRK	44869.7	26052.7	26923.3	21827.3	10577.3	24295.5	39790.7	35627.2	51803	57992	19292.8	14788.8
P78347	GTF2I_HUMAN	ESTSSKSPPRK.3	ESTSSKS[Ph]PPRK	44634.6	8927.68	38934.2	37648.1	16148.1	15989.6	39909.1	31059.1	35169.1	11311.4	26503.5	12929.4
P78347	GTF2I_HUMAN	RPSTFGIPR.2	RPS[Ph]TFGIPR	16198.1		25405.7	4115.64		3461.42	18312.8	2296.34	40922.6	5876.3	4539.67
P78347	GTF2I_HUMAN	RPSTYGIPR.2	RPS[Ph]TYGIPR	4968.31		14028	3767.17			8932.2	2169.12	17294.1	3741.54	2530.24
P78347	GTF2I_HUMAN	SILSPGGSCGPIK.2	SILS[Ph]PGGSC[cam]GPIK	20929.7	6719.07	14673.9	12415.6	4336	11964.8	23671.9	12043.4	35578	27199.8	7374.93	8400.4
P78362	SRPK2_HUMAN	TVSASSTGDLPK.2	TVS[Ph]AS[Ph]STGDLPK	4807.82	8951.03	1921.2	7476.56	10005.4	23027.3	3985.41	3548.09		5623.1	7758.03	14757.1
P78362	SRPK2_HUMAN	TVSASSTGDLPK.2	TVS[Ph]ASS[Ph]TGDLPK	6855.12	10071.9	1286.72	8323.56	11501	27832.6	5841.63	18429.9		6372.92	8113.35	18195
P78559	MAP1A_HUMAN	SHWDDSTSDSELEK.2	SHWDDS[Ph]TSDSELEK	97.5684			243.108	1118.66	8327.18		306.721			821.895	5794.48
P78559	MAP1A_HUMAN	SPCGLTEQYLHK.2	S[Ph]PC[cam]GLTEQYLHK						17681.8						1209.66
P78559	MAP1A_HUMAN	SPCGLTEQYLHK.3	S[Ph]PC[cam]GLTEQYLHK						6765
P80723	BASP1_HUMAN	ETPAATEAPSSTPK.2	ETPAATEAPS[Ph]STPK	10507.2			14835.9	5799.28		10158.6	4291.73		18399.7	8458.79
P82094	TMF1_HUMAN	SVSEINSDDELSGK.2	SVSEINS[Ph]DDELSGK	46161.7	41629.3	37037.7	38690.5	54086.7	22645.9	44733.5	42428.5	37825.9	43211.5	45325.8	31965.8
P83916	CBX1_HUMAN	ADSDSEDKGEESKPK.3	ADS[Ph]DSEDKGEESKPK			4763.55	2954.8	6729.05			8104.43	3104.5	5958.42	6304.7
P84103	SRSF3_HUMAN	ERSLSR.2	ERS[Ph]LS[Ph]R	27988.5	67802.7	57669.1	51904	124775	129933	43903.7	72176.9	50545	23324.1	57509.7	117863
P84103	SRSF3_HUMAN	ERSLSRER.2	ERS[Ph]LS[Ph]RER	97957.6	127203	74540.8	87657.5	120389	114485	115353	137485	67803.6	103667	104834	155886
P84103	SRSF3_HUMAN	NHKPSR.2	NHKPS[Ph]R			652.181						1388.07
P84103	SRSF3_HUMAN	NHKPSRSFSR.2	NHKPS[Ph]RS[Ph]FS[Ph]R	7269.64	11917.9	6453.59	4757.73	19128.5	13301.9	7580.07	9462.64	5972.82	6341.84	7575.73	14310.1
P84103	SRSF3_HUMAN	RRSPPPR.2	RRS[Ph]PPPR	183624	119242	154390	223089	384375	276002	156496	155928	203423	138939	237799	351080
P84103	SRSF3_HUMAN	SLSRDR.2	S[Ph]LS[Ph]RDR	19303.3	32786.9	21771.1	9229.76	38815.9	28498.7	6077.24	28326	5876.84	1209.26	18706.2	57611
P84103	SRSF3_HUMAN	SLSRER.2	S[Ph]LS[Ph]RER	61569.6	95247.8	70198	47807.1	62811.3	4109.22	37135.3	135542	64524.7	58125.7	51913.5	88023
P84103	SRSF3_HUMAN	SRSLSRDR.2	S[Ph]RS[Ph]LS[Ph]RDR	9336.42	17571.6	11750.9	10412.4	16327.9	17075.2	11830.5	13463	9820.99	11572.8	14474.5	23063.6
P84103	SRSF3_HUMAN	SRSLSRDR.3	S[Ph]RS[Ph]LS[Ph]RDR	37.854	830.364	1020.33	2.01149			415.783	1204.18	1190.7		386.088	2692.4
P84103;Q9Y2W1	SRSF3_HUMAN;TR150_HUMAN	SRSLSR.2	S[Ph]RS[Ph]LSR	11725	26928.8	17044.1	8958.55	37035.2	39400.9		24720.2	11542.2		17201.4	51017.3
P84103;Q9Y2W1	SRSF3_HUMAN;TR150_HUMAN	SRSRSLSR.2	S[Ph]RS[Ph]RS[Ph]LS[Ph]R	176.025	781.61		961.44	3167.65		814.407	741.432	1062		319.067
P85037	FOXK1_HUMAN	EEAPASPLRPLYPQISPLK.3	EEAPAS[Ph]PLRPLYPQIS[Ph]PLK	112349	159365	212025	69339.5	58032.8	369834	94951.3	93279.2	115650	52829.6	62542.5	262478
P85037	FOXK1_HUMAN	EGSPIPHDPEFGSK.2	EGS[Ph]PIPHDPEFGSK	196699	213407	137735	94081.1	173395	227680	156150	180455	138033	59777.9	147058	166966
P85037	FOXK1_HUMAN	SAPASPTHPGLMSPR.2	S[Ph]APAS[Ph]PTHPGLM[ox]SPR	52343.3	33771.5	32077.4	1900.11	49889.8	87744.8	33475.9	24866.8	31110.9	10657	36747	137523
P85037	FOXK1_HUMAN	SAPASPTHPGLMSPR.2	S[Ph]APAS[Ph]PTHPGLMS[Ph]PR	57198.1	27752.5	28020.9	8495.49	9897.16	44899.9	88561.3	40147.6	48875.8	31987.2	33664.5	148605
P85037	FOXK1_HUMAN	SAPASPTHPGLMSPR.2	S[Ph]APAS[Ph]PTHPGLMSPR	351967	214066	226696	41704.7	127817	768595	358185	279581	196589	114918	185827	1.74268e+06
P85037	FOXK1_HUMAN	SAPASPTHPGLMSPR.2	S[Ph]APASPT[Ph]HPGLMSPR	314240	196059	203200	38316.3	115699	682522	318841	248945	175396	103602	168402	1.55871e+06
P85037	FOXK1_HUMAN	SAPASPTHPGLMSPR.2	S[Ph]APASPTHPGLMSPR	21154	13006	9802.4	6061.26	6291.58	23737	20706.1	12340.9	16662	7060.58	11441	37682.4
P85037	FOXK1_HUMAN	SAPASPTHPGLMSPR.3	S[Ph]APAS[Ph]PTHPGLM[ox]SPR	18153.9	9699.98	12938.6	589.889	27008.5	50919.9	17132.2	11409.9	10480.3	2784.38	11709.4	82351.6
P85037	FOXK1_HUMAN	SAPASPTHPGLMSPR.3	S[Ph]APAS[Ph]PTHPGLMSPR	208049	156220	150552	26792.5	63006.1	634298	222330	247431	130140	63691.8	120384	1.25738e+06
P85037	FOXK1_HUMAN	SGGLQTPECLSR.2	SGGLQT[Ph]PEC[cam]LS[Ph]R	215046	32314	93909.2	9417.83	102409	171944	181601	87884.1	147246	51775.5	152364	648327
P85037	FOXK1_HUMAN	SGGLQTPECLSR.2	SGGLQTPEC[cam]LS[Ph]R	29781.5	31900.9	43923.5	12399.3	49111.4	81571.4	8990.83	27396.3	10713.2		20301.3	44069.6
P86790;P86791	CCZ1B_HUMAN;CCZ1_HUMAN	HIEPELAGRDSPIR.3	HIEPELAGRDS[Ph]PIR	10616.1	15310.2	16519.4	14214.1	15076	15115.2	10354.7	14269.4	22588	10408.5	21277.9
P98171	RHG04_HUMAN	GPGAPASPSASHPQGLDTTPKPH.3	GPGAPAS[Ph]PSASHPQGLDTTPKPH	8177.27	18312.6	9707.16	7190.3	14771.9	2977.94	6222.33	8570.44	11890.6	6512.37	15560.6
P98175	RBM10_HUMAN	GLVAAYSGESDSEEEQER.2	GLVAAYSGES[Ph]DS[Ph]EEEQER	123443	187178	159081	123774	138947	187280	122015	174045	121971	139685	93921	272285
P98175	RBM10_HUMAN	HRHSPTGPPGFPR.2	HRHS[Ph]PTGPPGFPR	27347.2	11217.4	32528.8	41122.8			23423.1	43457	42145.5	36500.1	5003.5
P98175	RBM10_HUMAN	HRHSPTGPPGFPR.3	HRHS[Ph]PTGPPGFPR	276073	209495	356215	354887			277744	352157	385450	355034	444004
P98175	RBM10_HUMAN	HSPTGPPGFPR.2	HS[Ph]PTGPPGFPR	10689.8	7935.38	13189	13561.8	16909.9	18524	9596.87	14446.8	5916.36	8793.22	17431.9	5442.45
P98175	RBM10_HUMAN	LASDDRPSPPR.2	LASDDRPS[Ph]PPR	50065.2	42002.6	35946.4	54185.8	85329	33354.3	48132.7	53191.1	55336.9	41544.9	85315.5	25513.8
P98175	RBM10_HUMAN	LASDDRPSPPR.3	LASDDRPS[Ph]PPR	21664.5	5503.39	28177.7	35024.2	48399.2	16419.5	31704.3	23102.7	39545.9	16713.5	18170.7	13547.6
P98175	RBM10_HUMAN	RHRHSPTGPPGFPR.4	RHRHS[Ph]PTGPPGFPR	2.23349	11322.8	649.337	2.40663		10809.1			6580.14			13190.6
Q00059	TFAM_HUMAN	NLSDSEKELYIQHAK.3	NLS[Ph]DSEKELYIQHAK	23241.7	17778.3	13140.4	10839.8	13926.6	10758.6	22011.6	24624.7	10080.4	9283.24	22547.1
Q00059	TFAM_HUMAN	NLSDSEKELYIQHAK.3	NLSDS[Ph]EKELYIQHAK	9544.31	7076.91	22527.6	19801.3	31279.6		13356.3	13499.2	26066.9	17622.7	48432.8
Q00341	VIGLN_HUMAN	DCDPGSPR.2	DC[cam]DPGS[Ph]PR	7093.97	5949.18	6781.13	22741.1	9311.44	2478.94	2670.09	7220.08	16410.7	15610.2	8125.27	3463.64
Q00536	CDK16_HUMAN	RVSLSEIGFGK.2	RVS[Ph]LSEIGFGK	5293.63		5083.62	16785.3	4594.77		2795.99	4157.6	5743.74	8360.94	5920.91
Q00536;Q00537	CDK16_HUMAN;CDK17_HUMAN	RLSLPADIR.2	RLS[Ph]LPADIR	13046.2	5305.22	32628	14471.1	16800.9		10279.5	8726.91	50641.4	10363.9	16836.4	3211.02
Q00537	CDK17_HUMAN	RASLSEIGFGK.2	RAS[Ph]LSEIGFGK	14758	15838.9	41039.8	6240.09	12690.3	10257	11207.2	11004.4	36153.7	5075.01	14410
Q00537	CDK17_HUMAN	RISMEDLNK.2	RIS[Ph]MEDLNK	3698.33	3898.8	14701.5	1867.73	2540.87		3771.8	3368.78	14811.8		3690.81
Q00537	CDK17_HUMAN	RISMEDLNKR.3	RIS[Ph]MEDLNKR	7092.98		11294.8	4790.04	2392.3		8590.68	4241.2	12848.7	1992.18	5340.37
Q00613	HSF1_HUMAN	GHTDTEGRPPSPPPTSTPEK.3	GHTDT[Ph]EGRPPSPPPTSTPEK	85576.3	51921.6	19973.3	28515.8	132725	29500.7	75096.6	43217.3	21454	23623	115902	16686.4
Q00613	HSF1_HUMAN	GHTDTEGRPPSPPPTSTPEK.3	GHTDTEGRPPS[Ph]PPPTS[Ph]TPEK	54149	23825.7	42457.3	16495.8	15848.2	30950.7	31155.1	13089.6	34441.2	25679.3	19234.6	22426.2
Q00613	HSF1_HUMAN	GHTDTEGRPPSPPPTSTPEK.3	GHTDTEGRPPS[Ph]PPPTSTPEK	111993	71677	27131.3	38137.3	169237	40866.4	91453.9	57628.8	30934	31224.8	149529	31138.3
Q00613	HSF1_HUMAN	VKEEPPSPPQSPR.2	VKEEPPS[Ph]PPQS[Ph]PR	138184	91869.3	109388	45085.8	102926	169090	103119	57547.1	98447.3	84460.9	130589	188579
Q00613	HSF1_HUMAN	VKEEPPSPPQSPR.3	VKEEPPS[Ph]PPQS[Ph]PR	28801.8	11421.4	22710.6	9202.47	34468.2	38083.4	28902.7	10198.8	15565.4		19183.6	35263.6
Q00839	HNRPU_HUMAN	SSSPVNVK.2	[ac]SSS[Ph]PVNVK	337563	167209	445986	344897	811089	480948	435877	328009	436461	254675	249201	411599
Q00839	HNRPU_HUMAN	SSSPVNVK.2	SSS[Ph]PVNVK	15609.3	11697.5	18072.3	18293.5	29974.9	33514.6	14984.2	12079.5	17190.3	16692.7	16111.7	19275.6
Q00839	HNRPU_HUMAN	SSSPVNVKK.2	[ac]SSS[Ph]PVNVKK	150099	103571	100899	155868	104227	117762	181348	136625	95706.2	206672	198275	164263
Q00839	HNRPU_HUMAN	SSSPVNVKK.2	SSS[Ph]PVNVKK	5721.08	2036.58	4560.56	6298.69	3171.56	5414.13	6825.09		3678.87	9381.2	9531.69	4608.38
Q01082	SPTB2_HUMAN	AQTLPTSVVTITSESSPGKR.3	AQTLPTSVVTITS[Ph]ESSPGKR	52454.9	65415.3	2819.22	83949.8	237168	222485	35523.4	65147.4		93826.3	215046	245950
Q01082	SPTB2_HUMAN	AQTLPTSVVTITSESSPGKR.3	AQTLPTSVVTITSES[Ph]SPGKR	65905.1	92815.2		111446	309311	296781	46427.4	89812.8		125764	279907	327636
Q01082	SPTB2_HUMAN	RPPSPEPSTK.2	RPPS[Ph]PEPSTK	25937.3	70643.9	1690.32	68903.3	444080	98953.7	25532.6	75106		56388.8	425752	68113.6
Q01082	SPTB2_HUMAN	TSSKESSPIPSPTSDR.2	TSS[Ph]KES[Ph]SPIPS[Ph]PTSDR	19954	88433.3	6729.79	47200.2	364046	615180	11265.5	65087.1		82318.2	364574	529490
Q01082	SPTB2_HUMAN	TSSKESSPIPSPTSDRK.2	TSS[Ph]KES[Ph]SPIPS[Ph]PTSDRK	15217.8	102289		30971.3	140222	326096	12553.4	56505.3	26018.3	52957.3	177247	446058
Q01105	SET_HUMAN	LNEQASEEILK.2	LNEQAS[Ph]EEILK	5762.12		7230.85	4697.68	2348.92		3609.66	2697.74	7536.75	3893.76	2822.31
Q01105	SET_HUMAN	RQSPLPPQK.2	RQS[Ph]PLPPQK	300601	44714.8	138955	140247	52688.2	20385	305315	41273.6	146860	110096	60058.4	14087
Q01105	SET_HUMAN	RQSPLPPQKK.2	RQS[Ph]PLPPQKK	62062.8	5071.91	25253.8	19213.5	12081.9	5066.25	58208.5	8045.25	24318	22582.4	11587.8
Q01130	SRSF2_HUMAN	SKSPPKSPEEEGAVSS.2	S[Ph]KS[Ph]PPKS[Ph]PEEEGAVSS	42402.7	65615	20186.2	18634.9	88279.4	75769.4	27108.9	31966.6	20093.9	26593.9	44088.6	129983
Q01130	SRSF2_HUMAN	SKSPPKSPEEEGAVSS.2	S[Ph]KSPPKSPEEEGAVSS	24920.9	14965.4	111222	22863.9			15986.3		94307.5	27268.7	11481.6
Q01130	SRSF2_HUMAN	SKSPPKSPEEEGAVSS.2	SKS[Ph]PPKSPEEEGAVSS	10882.4	9144.56	62712.7	13422.6	3978.87		10217.1	3483.08	54513.1	14996.9	5763.54	5034.29
Q01130	SRSF2_HUMAN	SRSPPPVSK.2	S[Ph]RS[Ph]PPPVSK	721996	854291	725371	663719	873257	1.20126e+06	653143	713686	645207	519642	971499	1.55216e+06
Q01130	SRSF2_HUMAN	SRSPPPVSK.2	SRS[Ph]PPPVSK	17818.7		36807.7	20437.9	24282.9	12225.8	13683.1	18822.9	39158.9	17116.3	17062.5
Q01130	SRSF2_HUMAN	SRSRSPPPVSK.2	S[Ph]RS[Ph]RS[Ph]PPPVSK	85218.2	117525	82187.9	86692.2	125202	135611	85713.7	95932.3	88512.3	85338.8	146029	215050
Q01130	SRSF2_HUMAN	SRSRSPPPVSK.3	S[Ph]RS[Ph]RS[Ph]PPPVSK	29940.4	40987.6	31418.3	21516.7	38540.2	71714.8	22237.3	36766.9	24247.7	16345.4	31185.1	87559.9
Q01130	SRSF2_HUMAN	TSPDTLR.2	TS[Ph]PDTLR	142296	72252.6	128312	161989	137489	158831	207983	130895	163505	119073	116766	141326
Q01130	SRSF2_HUMAN	TSPDTLRR.2	TS[Ph]PDTLRR	9872.08	9687.68	5772.4	7327.65	4762.27	5092.33	14032.4	11558.8	5928.86	7852.7	10028.5	7747.53
Q01167	FOXK2_HUMAN	EGSPAPLEPEPGAAQPK.2	EGS[Ph]PAPLEPEPGAAQPK	39037.7	19774.8	40407.3	57089.9	39054	59932.1	35571.7	19827.3	38472.2	34677.7	25397.5	36417.1
Q01196	RUNX1_HUMAN	RFTPPSTALSPGK.2	RFT[Ph]PPSTALS[Ph]PGK	179270	255983	181430	48162.3	133827	304612	201012	252484	147294	80377.1	158644	438113
Q01196	RUNX1_HUMAN	RFTPPSTALSPGK.2	RFTPPSTALS[Ph]PGK	4988.56	3294.34	10243.9	5348.07	7179.02	5372.86	4092.32	7314.91	11679.3	3257.83	12040.7	3192.75
Q01433	AMPD2_HUMAN	TDSDSDLQLYK.2	TDS[Ph]DSDLQLYK	21846.9	5715.43	20449.3	13166.2	16438.6	41690.2	18355.8	7513.33	13530.5	7181.65	17142	44326.5
Q01518	CAP1_HUMAN	PFSAPKPQTSPSPK.2	PFSAPKPQT[Ph]SPSPK	31199.7	30943.2	9889.4	21612.6	16103.2		29392.9	19368.5	8945.43	24293.6	25065.6
Q01518	CAP1_HUMAN	PFSAPKPQTSPSPK.2	PFSAPKPQTS[Ph]PS[Ph]PK	14550.7	8220.96	39505	24345	5015.69	14259.7	11150.9	7852.06	39545.7	29337	8446.5	11843.4
Q01518	CAP1_HUMAN	PFSAPKPQTSPSPK.2	PFSAPKPQTS[Ph]PSPK	19971.1	18359.8	7063.79	13549.7	9251.58		19102.2	12225.6	7474.97	15182.9	16758.1
Q01518	CAP1_HUMAN	PFSAPKPQTSPSPK.3	PFSAPKPQT[Ph]SPSPK	15498.5	3845.3	8378.47	11998.5	8111.47	7389.92	21152.3	10778.2	11069.6	7980.69	9117.57
Q01518	CAP1_HUMAN	PFSAPKPQTSPSPKR.3	PFSAPKPQT[Ph]SPS[Ph]PKR	5299.62		7864.07	1939.02				1866.31	8828	2531.71
Q01518	CAP1_HUMAN	PFSAPKPQTSPSPKR.3	PFSAPKPQTS[Ph]PS[Ph]PKR	2585.53		3688.4	4348.28					5125.97	5811.47	1852.28
Q01518	CAP1_HUMAN	PQTSPSPK.2	PQTS[Ph]PSPK	38729.5	9826.66	5962.82	14984.8	1420.36		31964.7	22829.9	9290.75	72391.4	2197.63	3954.48
Q01518	CAP1_HUMAN	PQTSPSPKR.2	PQTS[Ph]PS[Ph]PKR	3612.74		4025.73		3065.42	5090.55		2358.79	12396.2		4415.32
Q01518	CAP1_HUMAN	SGPKPFSAPKPQTSPSPK.2	SGPKPFSAPKPQT[Ph]SPSPK	117089	105921	46992.8	69786.9	66525.7	76327.6	139410	103291	37868.5	130506	66393.4	76762.2
Q01518	CAP1_HUMAN	SGPKPFSAPKPQTSPSPK.2	SGPKPFSAPKPQTS[Ph]PS[Ph]PK	59919.9	53955.4	80653.6	72666.2	30920.2	68220.9	66338.6	41798.5	82600.1	136659	31458.8	73028.4
Q01518	CAP1_HUMAN	SGPKPFSAPKPQTSPSPK.2	SGPKPFSAPKPQTS[Ph]PSPK	113897	108551	47341.1	70774.6	67139	78911.6	142114	105196	39690.8	162819	68067.4	73729.4
Q01518	CAP1_HUMAN	SGPKPFSAPKPQTSPSPK.3	SGPKPFSAPKPQT[Ph]SPS[Ph]PK	289156	129257	479875	330381	77186.1	159031	320702	208434	426851	595550	124264	228446
Q01518	CAP1_HUMAN	SGPKPFSAPKPQTSPSPK.3	SGPKPFSAPKPQT[Ph]SPSPK	1.71156e+06	867051	768655	958907	435793	699589	2.16112e+06	1.37836e+06	512783	1.63636e+06	754282	774317
Q01518	CAP1_HUMAN	SGPKPFSAPKPQTSPSPK.3	SGPKPFSAPKPQTS[Ph]PS[Ph]PK	284896	126996	473226	325337	74230.5	156290	343103	205086	420328	587316	122442	223506
Q01518	CAP1_HUMAN	SGPKPFSAPKPQTSPSPK.3	SGPKPFSAPKPQTS[Ph]PSPK	1.68355e+06	858807	761804	947446	431656	695307	2.12475e+06	1.35686e+06	510793	1.62386e+06	743765	764373
Q01518	CAP1_HUMAN	SGPKPFSAPKPQTSPSPK.4	SGPKPFSAPKPQT[Ph]SPSPK	7323.12	5005.03		4784.88			7694.08	9082.2		6072.57	2655.7	11058.9
Q01581	HMCS1_HUMAN	RPTPNDDTLDEGVGLVHSNIATEHIPSPAK.4	RPTPNDDTLDEGVGLVHSNIATEHIPS[Ph]PAK	62571.5	86520.3	146272	37177.9	70836.7		55710.5	49195.4	97971.6	86368.7	30272.2
Q01664	TFAP4_HUMAN	FIQELSGSSPK.2	FIQELSGS[Ph]SPK	28124.6	14142.5	61562.5	12699	15297.6	50823.6	28328.5	19128.3	52150.4	10732.3	18231.5	41866.4
Q01664	TFAP4_HUMAN	FIQELSGSSPK.2	FIQELSGSS[Ph]PK	28163.4	14167.1	63137.4	12680.9	15330.2	50823.1	28475.9	19235.2	52459.5	11050.9	18829.4	42216.8
Q01804	OTUD4_HUMAN	EESSEDENEVSNILR.2	EES[Ph]S[Ph]EDENEVSNILR	26509.2	35917	15874.9	49241.4	38398.4	43710.2	25227.3	29494.2	17358.4	63706.4	48725.6	63599.8
Q01813	PFKAP_HUMAN	GRSFAGNLNTYK.2	GRS[Ph]FAGNLNTYK	14850.6	2640.23	3940.59	3531.1	4230.18	6490.89	15164.7	2796.83	4859.08	2660.58	3820.16	4378.05
Q01813	PFKAP_HUMAN	SFAGNLNTYK.2	S[Ph]FAGNLNTYK	47186.8	11636.4	10984.3	10939	21743	19553.1	48709	17793.7	11229.2	9087.11	19242.6	24884.5
Q01831	XPC_HUMAN	VIKDEALSDGDDLR.2	VIKDEALS[Ph]DGDDLR	26002.2	19275.4	11134	15425.6	10154.6	20785.1	20942.3	22025.8	14977.4	13491	15084.3
Q02040	AK17A_HUMAN	HAYKDDSPR.2	HAYKDDS[Ph]PR	3410.97	3180.9	3156.7	795.227	5700.59	4052.49			1914.31	1727.87	3746.49
Q02040	AK17A_HUMAN	VVPEDGSPEKR.2	VVPEDGS[Ph]PEKR	18215.9	37338.8	17659.8	14134.8	37528.9	13095.5	16659.1	29662.7	20123.7	10564	59794.8	10798.8
Q02040	AK17A_HUMAN	VVPEDGSPEKR.3	VVPEDGS[Ph]PEKR	2.25094	222.495	3.37252	2.36179	203.643	44.785		460.667	2.63465	3.42247	3.23319
Q02080	MEF2B_HUMAN	TPPPLYLPTEGR.2	T[Ph]PPPLYLPTEGR	46697	6918.49	46361	32786.6	130309	49097.9	38383.7	7252.79	39881.3	23482.9	135567	36379.6
Q02363	ID2_HUMAN	KNSLSDHSLGISR.3	KNS[Ph]LSDHSLGISR	34011.6	17308.5	14573.3	6165.34	5237.82	26562.4	27625.2	10533.4	4387.05		6181.06	14923.8
Q02447	SP3_HUMAN	IGPPSPGDDEEEAAAAAGAPAAAGATGDLASAQLGGAPNR.4	IGPPS[Ph]PGDDEEEAAAAAGAPAAAGATGDLASAQLGGAPNR	215224	304897	102804	153840	191384	117762	190087	308179	104144	149613	212246	103948
Q02543	RL18A_HUMAN	AHSIQIMK.2	AHS[Ph]IQIMK	4444.51		7478.89	1312.51			1785	90.5351	6393.85		2709.87
Q02543	RL18A_HUMAN	SSGEIVYCGQVFEKSPLR.3	SSGEIVYC[cam]GQVFEKS[Ph]PLR	29671.3	20494.3	41280.8	26747.1	21816	30188.6	28436	19296	35690.1	25368.4	23846.6	30205
Q02880	TOP2B_HUMAN	ASPITNDGEDEFVPSDGLDKDEYTFSPGK.3	ASPIT[Ph]NDGEDEFVPS[Ph]DGLDKDEYTFSPGK	132118	207523	206908	102784	110606	415714	145224	176189	204050	107113	105544	526419
Q02880	TOP2B_HUMAN	KASGSENEGDYNPGR.2	KAS[Ph]GS[Ph]ENEGDYNPGR	10163.2	45322.7	6132.15	15238.8	7759.58	29433.3	9795.73	24636.3	6698.76	20535.7	8835.65	58481.5
Q02880	TOP2B_HUMAN	KASGSENEGDYNPGR.2	KAS[Ph]GSENEGDYNPGR	9976.79	31575.9	7691.2	6817.13	6913.17	38068.8	7725.47	12594.7	5429.94	5946.72	9117.16	32608.7
Q02880	TOP2B_HUMAN	KVVEAVNSDSDSEFGIPK.2	KVVEAVNS[Ph]DS[Ph]DSEFGIPK	135106	297707	162926	102394	166610	798514	124974	237588	166448	122270	118392	815174
Q02880	TOP2B_HUMAN	KVVEAVNSDSDSEFGIPK.3	KVVEAVNS[Ph]DS[Ph]DSEFGIPK	48492.4	107695	54955.7	34766.1	37904.9	326004	50001.6	92795.5	50312.1	33957.5	43302.3	309813
Q02880	TOP2B_HUMAN	SEDDSAKFDSNEEDSASVFSPSFGLK.3	SEDDSAKFDS[Ph]NEEDSASVFSPSFGLK	93909.8	122991	91643.8	77303.2	123704	310280	82387.8	132167	102279	53493.7	70520.5	336218
Q02880	TOP2B_HUMAN	VKASPITNDGEDEFVPSDGLDKDEYTFSPGK.3	VKAS[Ph]PITNDGEDEFVPS[Ph]DGLDKDEYTFS[Ph]PGK	105608	149424	252115	126211	72809.7	368956	130226	133760	209760	176886	74481.4	393937
Q02880	TOP2B_HUMAN	VKASPITNDGEDEFVPSDGLDKDEYTFSPGK.3	VKAS[Ph]PITNDGEDEFVPS[Ph]DGLDKDEYTFSPGK	284898	411352	266134	173272	206475	955223	336705	347174	238419	225426	147204	1.4182e+06
Q02880	TOP2B_HUMAN	VKASPITNDGEDEFVPSDGLDKDEYTFSPGK.4	VKAS[Ph]PITNDGEDEFVPS[Ph]DGLDKDEYTFSPGK	144109	235547	105692	57872.5	51517.2	543593	168416	201701	78387.9	77920.9	60184.1	764942
Q02880	TOP2B_HUMAN	VVEAVNSDSDSEFGIPK.2	VVEAVNS[Ph]DS[Ph]DSEFGIPK	397128	634228	423588	297984	462262	2.89935e+06	498071	617546	411239	336985	447263	3.78899e+06
Q03001	DYST_HUMAN	AMVDSQQKSPVKR.3	AMVDSQQKS[Ph]PVKR	352.735		609.027	6841.57					741.541	4064.94	1536.27
Q03111	ENL_HUMAN	SPESCSKPEK.2	S[Ph]PESC[cam]SKPEK	5662.58	10060.3	12559.6	6931.15	15753.9	7133.64	9498.94	7372.01	7222.89	15927.9	23161.4
Q03164	KMT2A_HUMAN	AGKLSPLK.2	AGKLS[Ph]PLK	1844.11	468.403	3922.66	6106.91	1447.32		1884.16	1334.03	4859.47	6467.42	1260.54
Q03164	KMT2A_HUMAN	SASPSVPGPTKPKPK.3	SAS[Ph]PSVPGPTKPKPK	11935.1	6691.14	4264.4	16370.5	2101.24	6059.72	8690.76	13197.1	3362.51	14305.1	4287.72
Q03164	KMT2A_HUMAN	TIAHSPTSFTESSSK.2	TIAHS[Ph]PTSFTESSSK	7634.03	8545.68	3738.87	6963.83			6683.85	6935.52	3962.85	8885.02	3112.05
Q03188	CENPC_HUMAN	IKDTCIQSPSKECQK.3	IKDTC[cam]IQS[Ph]PSKEC[cam]QK	5856	9700.87	6348.49	2453.41	2040.89	9979.29	5894.58	5339.89	5565.43	4186.21	2555.21
Q03188	CENPC_HUMAN	SWITIPR.2	S[Ph]WITIPR	20665.5	12900.8	23100.4	15301.1	5597.04	19776.3	22222.8	13915.2	16385.8	15239.2	7927.42	16812.4
Q03252	LMNB2_HUMAN	AGGPATPLSPTR.2	AGGPAT[Ph]PLS[Ph]PTR	58762	9251.66	21320.5	36182.2	38480.5	18404	45021.4	17965.1	41058.1	111285	40075.8	24878.2
Q03252	LMNB2_HUMAN	ATSSSSGSLSATGR.2	ATSS[Ph]SSGSLSATGR	29870.1	25181.5	13534.1	31456.3	23782.1	10321.4	30591.7	14465.9	14182.3	26574	39098.8	4514.18
Q04637	IF4G1_HUMAN	AALSEEELEKK.2	AALS[Ph]EEELEKK	3652.42		1268.19	4230.69	1873.7		3694.76	1554.79	2568.68	2712.99	3735.62
Q04637	IF4G1_HUMAN	AASLTEDR.2	AAS[Ph]LTEDR	3475.41		4479.52	6278.56	5624.59		3634.77	2747.6	9803.43	8788.48	4895.36
Q04637	IF4G1_HUMAN	AASLTEDRDR.2	AAS[Ph]LTEDRDR	37660.9	18605.6	46071.6	62112.9	77324.9	17461.9	55386.3	47437.8	74188.1	119495	81341.8	23811.2
Q04637	IF4G1_HUMAN	EAALPPVSPLK.2	EAALPPVS[Ph]PLK	49335.2	16249	60900.8	164831	107998	40839.7	42141.7	36724.1	88040.3	132633	92327.4	14755
Q04637	IF4G1_HUMAN	KAASLTEDR.2	KAAS[Ph]LTEDR	612.289		9495.61	18053.2	11921		10708.7	8372.27	31259	22288.3	18173.3	4778.46
Q04637	IF4G1_HUMAN	KAASLTEDRDR.2	KAAS[Ph]LTEDRDR	8226.33	4175.01	8861.32	16827.4	18354		15176.4	8386.74	13799.8	43763	21661.8
Q04637	IF4G1_HUMAN	KAASLTEDRDR.2	KAASLT[Ph]EDRDR	4000.1	1194.5	4228.8	7304.27	9123.12		7123.16	2994.1	6581.02	21191.9	9502.39
Q04637	IF4G1_HUMAN	KAASLTEDRDR.3	KAAS[Ph]LTEDRDR	20608.6	6603.31	33417.6	54913.3	23996.6	9780.52	37166.5	24152.7	40406.7	90666.2	31462.7	11915.7
Q04637	IF4G1_HUMAN	RSFSKEVEER.2	RS[Ph]FS[Ph]KEVEER	1067.3		1519.07	939.266					2174.14	1259.53	261.7
Q04637	IF4G1_HUMAN	RSFSKEVEER.3	RS[Ph]FS[Ph]KEVEER	1505.91		4804.91	3515.71	607.772	7663.24	2484.36	1331.53	6780.22	4670.89	657.406	16240.8
Q04637	IF4G1_HUMAN	RSFSKEVEER.3	RSFS[Ph]KEVEER	1554.36		5341.81	3825.87	146.147	3993.59	728.89		2921.56	1086.47	176.481
Q04637	IF4G1_HUMAN	SFSKEVEER.2	S[Ph]FS[Ph]KEVEER	6974.77	3004.88	18693.3	17228.7	8503.12	21691.8	12843.9	5435.34	17737.1	35937	14245	45546.4
Q04637	IF4G1_HUMAN	SFSKEVEER.2	S[Ph]FSKEVEER	51531.3	17685.4	47119.3	71138.8	26258.2	22465.3	95992.6	59241.8	55157	240379	48558.2	45064.3
Q04637	IF4G1_HUMAN	SFSKEVEER.2	SFS[Ph]KEVEER	114352	51944.7	186749	282517	157887	161907	123727	61656.4	180474	102078	78015.5	104936
Q04637	IF4G1_HUMAN	SRERPSQPEGLR.3	S[Ph]RERPSQPEGLR	9179.95	2860.59	8282.56	13259.2	2745.14	12885.7	9461.86	8796.69	7709.03	6408.9	4047.5	8975.88
Q04726	TLE3_HUMAN	DAPTSPASVASSSSTPSSK.2	DAPT[Ph]SPASVASSSSTPSSK	204714	384678	71111.3	42650.1	221964	156193	138845	283472	75679.3	45818.3	165183	110057
Q04726	TLE3_HUMAN	DAPTSPASVASSSSTPSSK.2	DAPTS[Ph]PASVASSSSTPSSK	235789	426150	80227.3	46434.3	254405	170761	156996	307072	87445.2	53239.5	184982	119173
Q04726	TLE3_HUMAN	ESSANNSVSPSESLR.2	ESSANNSVS[Ph]PSESLR	92395.5	133695	27690.3	18648.8	91192.9		98575.6	115700	38786.4	20617.9	77978.5	35908.9
Q04727	TLE4_HUMAN	SSSVSPSASFR.2	SSS[Ph]VSPSASFR	7944.5	6771.77	4213.12	13431.9	14326.8	7582.15	7112.87	7275.77	4505.43	12671.8	7974.85	11574.7
Q05209	PTN12_HUMAN	DVDVSEDSPPPLPER.2	DVDVSEDS[Ph]PPPLPER	5130.84	75399.4	1579.24	12657.5	46325.7	2222.67	7446.5	63655.4		15280.9	41108.5
Q05209	PTN12_HUMAN	NLSFEIK.1	NLS[Ph]FEIK	15650.1	25194.9	3928.14	17771.6	22358.2	14227.4	12462.6	27573.3		20920.6	18842.5	17914.4
Q05209	PTN12_HUMAN	NLSFEIK.2	NLS[Ph]FEIK	1033.9	5959.56		4319.32	11501.9	3540.06		7790.98		3892.97	6037.33	2740.93
Q05469	LIPS_HUMAN	SVSEAALAQPQGPLGTDSLK.2	S[Ph]VSEAALAQPQGPLGTDSLK	18875.5	22431.7	22517.6	11204.5	46398	14615.4	19771.9	21196.6	23468.7	10495.7	49669
Q05469	LIPS_HUMAN	SVSEAALAQPQGPLGTDSLK.2	SVS[Ph]EAALAQPQGPLGTDSLK	20043.8	20814.1	24391.7	14468.8	51083.1	14355.8	19016.3	25767.2	26425.7	11662.1	50358.4
Q05519	SRS11_HUMAN	DYDEEEQGYDSEKEK.2	DYDEEEQGYDS[Ph]EKEK	58608.1	113940	68315.5	92204.2	150023	86583.7	54352.2	63056.9	70624.7	83014.3	90492	93753.5
Q05519	SRS11_HUMAN	DYDEEEQGYDSEKEK.3	DYDEEEQGYDS[Ph]EKEK	10780.7	17148	11054.2	13769.2	35772.3	15708.6	9761.75	10443.2	11036.7	10436.1	14088.1	18269.8
Q05519	SRS11_HUMAN	DYDEEEQGYDSEKEKK.2	DYDEEEQGYDS[Ph]EKEKK	21632.9	42561.6	22402.8	28884.2	44246.2	21884.8	21572.8	27005.9	23837.7	41609.2	29903.1
Q05519	SRS11_HUMAN	DYDEEEQGYDSEKEKK.3	DYDEEEQGYDS[Ph]EKEKK	10474.4	13993.5	9449.27	9833.61	20745.1	10890.2	8964.83	9862.97	8903.9	11191.6	14493.4	12335.9
Q05519	SRS11_HUMAN	KLSRSPSPR.3	KLS[Ph]RS[Ph]PS[Ph]PR	8811.88	12312.6	15999.6	10345.2	7221.8	12789.8	9287.65	9415.33	10579.8	7674.17	8794.23	19307.6
Q05519	SRS11_HUMAN	KPIETGSPK.2	KPIETGS[Ph]PK	234907	234000	282318	291717	240367	217878	263829	233396	319733	247914	366101	137032
Q05519	SRS11_HUMAN	LNHVAAGLVSPSLK.2	LNHVAAGLVS[Ph]PSLK	49105.2	20097.5	44709	50364.9	44223.4	40103.7	57947.6	24814.6	70028.2	58798.8	38067
Q05519	SRS11_HUMAN	LNHVAAGLVSPSLK.3	LNHVAAGLVS[Ph]PSLK	11912.5	3286.88	11009.7	11861.8	7359.96	11387.4	13021.6	5790.65	18979.1	12156.2	8559.42
Q05519	SRS11_HUMAN	TKECSVEK.2	TKEC[cam]S[Ph]VEK	3132.14		3850.78	3142.32	941.774		1868.97		1994.58		2082.96
Q05519	SRS11_HUMAN	VNGDDHHEEDMDMSD.2	VNGDDHHEEDMDMS[Ph]D	52872.7	46452.1	51739.1	48257	49588.6	37273.4	48737.5	36781	44659.4	67954.7	53563.9	52922.5
Q05655	KPCD_HUMAN	ARLSYSDK.2	ARLS[Ph]YSDK	5698.34	18556.8	36519.2	36385.2	90722.5	8446.93	6274.91	25126.9	36892.2	24783.6	37305.5	11480.7
Q05655	KPCD_HUMAN	RSDSASSEPVGIYQGFEK.3	RSDS[Ph]ASSEPVGIYQGFEK		4489.66	24931.8	19519	21934.2	10005.5		7923.4	22369.9	27743.3	16875.1
Q05655	KPCD_HUMAN	SDSASSEPVGIYQGFEK.2	SDS[Ph]ASSEPVGIYQGFEK	1545.17		28577.3	15822.3	22451.1	13051.3	3077.47	6736.6	23113.5	21199	14412.7
Q05D32	CTSL2_HUMAN	KYSEVDDSLPSGGEKPSK.3	KYS[Ph]EVDDSLPSGGEKPSK	33312.7	23527.4	41200.1	24934.7	17871.1	69641.9	26473.4	10059.7	30480.7	9670.3	16232.1	28401.7
Q06210	GFPT1_HUMAN	VDSTTCLFPVEEK.2	VDS[Ph]TTC[cam]LFPVEEK	227307	209417	225802	444759	229414	462138	209577	214292	262864	469810	208609	521180
Q06265	EXOS9_HUMAN	APIDTSDVEEK.2	APIDT[Ph]SDVEEK	65008.8	82248.3	73853.1	87684.2	143435	52721.3	59969.4	94258.7	78212.1	66294.3	84814	78319.7
Q06265	EXOS9_HUMAN	APIDTSDVEEK.2	APIDTS[Ph]DVEEK	73004.5	88039.2	80206.1	95510.8	154333	59007.6	66639.4	101551	85741.1	72776	93872.6	87050.9
Q06413	MEF2C_HUMAN	NSPGLLVSPGNLNK.2	NS[Ph]PGLLVS[Ph]PGNLNK	9247.23		20881.8	3611.82			11860.1	3921.08	34718.5	13836.4	3466.17
Q06413	MEF2C_HUMAN	NSPGLLVSPGNLNK.2	NS[Ph]PGLLVSPGNLNK	163736	162085	294126	45049	153206		223758	143521	287890	47529.2	163397
Q06413	MEF2C_HUMAN	SPPPMNLGMNNR.2	S[Ph]PPPMNLGMNNR	20350.2	16754.3	34747.4	8224.12	6449.03		21370.2	18743.3	26504.6	7557.95	11920.9
Q07352	TISB_HUMAN	RHSVTLPSSK.2	RHS[Ph]VTLPSSK	7484.24			2316.03				4805.28	8185.13
Q07666	KHDR1_HUMAN	SGSMDPSGAHPSVR.2	S[Ph]GSMDPSGAHPSVR	344254	245492	218402	245205	118324	388779	311106	232289	324611	266093	246811	190993
Q07666	KHDR1_HUMAN	SGSMDPSGAHPSVR.2	SGS[Ph]M[ox]DPSGAHPSVR	33948.3	35272.9	30874.1	15411.5	20293.2	34320.9	27455.7	26575.9	38973.5	19474.1	20548.5	23800.4
Q07666	KHDR1_HUMAN	SGSMDPSGAHPSVR.2	SGS[Ph]MDPSGAHPSVR	429877	300811	271759	305962	146221	485773	387706	288381	406425	327536	307553	233517
Q07666	KHDR1_HUMAN	SGSMDPSGAHPSVR.3	SGS[Ph]MDPSGAHPSVR	32780.3	10227	36316	26875.3	7903.13	62274.5	44868.1	22954.3	54925.9	21537.1	12446.6	28608
Q07866	KLC1_HUMAN	SRESLNVDVVK.2	S[Ph]RES[Ph]LNVDVVK	5245.47	1539.85	2709.79	1863.3	5265.72	4376.66	9903.19	3091.37	4040.56	3435.95	3175.44	8767.34
Q07866	KLC1_HUMAN	SRESLNVDVVK.2	S[Ph]RESLNVDVVK	69636.2	48200.9	72498.8	65624.8	93732.6	17033.2	71146.5	50686.7	69316.6	88168.6	84258.7	19144.7
Q07866	KLC1_HUMAN	SRESLNVDVVK.2	SRES[Ph]LNVDVVK	70354.7	48692.3	72849.4	67157.4	94026.3	17609.7	71063.8	50790.3	69244.1	88633.8	84279.7	18919.8
Q07866	KLC1_HUMAN	SRESLNVDVVK.3	S[Ph]RESLNVDVVK	2939.35		4663.63	3712.17	5022.07		4496.84	5504.43	5336.42	3141.26	6534.85
Q07955	SRSF1_HUMAN	GSPRYSPR.2	GS[Ph]PRYS[Ph]PR	23672.3	23745.9	19280.8	18360.9	31678.5	30567.7	22172	36209.4	17676.1	20035.1	22473	38950.2
Q07955	SRSF1_HUMAN	SPSYGR.2	S[Ph]PS[Ph]YGR	2016.83			1013.13	3572.54		1448.21	416.434	417.293
Q07955	SRSF1_HUMAN	SPSYGRSR.2	S[Ph]PS[Ph]YGRS[Ph]R	2145.26	5957.98	3038.4		2658.92	4315.63		6531.87	1668.41		2548.44	5980.1
Q07955	SRSF1_HUMAN	SRGSPRYSPR.2	SRGS[Ph]PRYS[Ph]PR	12420.4	15100.1	7402.18	8021.51	9717.69	14854.4	15137.7	20302.9	7289.37	19152	11704.5	22376.3
Q07955	SRSF1_HUMAN	SRGSPRYSPR.3	SRGS[Ph]PRYS[Ph]PR	26170.8	16517.6	19724.5	27198.8	16096.1	44159.5	36442.5	50172.5	25201.1	36444.6	19850.4	44503.8
Q07955	SRSF1_HUMAN	VDGPRSPSYGR.2	VDGPRS[Ph]PS[Ph]YGR	408627	864790	422586	364255	640918	955211	336521	576879	422726	267415	545485	1.11385e+06
Q07955	SRSF1_HUMAN	VDGPRSPSYGR.2	VDGPRS[Ph]PSYGR	225086	168811	196814	238696	217014	108666	245508	219691	306882	207917	310432	128686
Q07955	SRSF1_HUMAN	VDGPRSPSYGR.3	VDGPRS[Ph]PS[Ph]YGR	19211.9	19939.1	28886.8	21816.2	32051.3	69757.8	20152.7	26860.6	28723.7	12436.4	10460	77773.7
Q07955	SRSF1_HUMAN	VDGPRSPSYGR.3	VDGPRS[Ph]PSYGR	17254.5	7076.34	28889.4	32037.3	19518.5	15942.1	30324.1	25409.2	44303.8	20660.7	15215.4	15587.6
Q07955	SRSF1_HUMAN	VDGPRSPSYGRSR.2	VDGPRS[Ph]PS[Ph]YGRS[Ph]R	37574.4	90697.4	30328.5	28962.4	38835	42424.7	41242.4	83494	25258.1	45856.6	47606.5	72018.1
Q07955	SRSF1_HUMAN	VDGPRSPSYGRSR.2	VDGPRS[Ph]PSY[Ph]GRS[Ph]R	39154.1	95682.4	31834.6	30204.8	40846.7	43126	42609	85241.5	26574.5	47519.8	48877.9	75243.3
Q07955	SRSF1_HUMAN	VDGPRSPSYGRSR.3	VDGPRS[Ph]PS[Ph]YGRS[Ph]R	24308.2	51277.6	24052.1	14022.2	36938.8	40532.4	31162	47841	16795.4	22463.7	22908.8	65791
Q07955	SRSF1_HUMAN	VKVDGPRSPSYGR.2	VKVDGPRS[Ph]PS[Ph]YGR	460620	1.11784e+06	376622	444081	564991	781807	528811	704328	361852	504650	601802	1.16781e+06
Q07955	SRSF1_HUMAN	VKVDGPRSPSYGR.2	VKVDGPRS[Ph]PSYGR	35763	40278.5	36984.4	42078.2	40535.1	25098.4	55962.6	49817.8	30721.6	74689.7	59035.3	21033.5
Q07955	SRSF1_HUMAN	VKVDGPRSPSYGR.3	VKVDGPRS[Ph]PS[Ph]YGR	777267	887471	936483	678878	726713	1.30785e+06	947768	1.13458e+06	661455	527799	605484	1.86788e+06
Q07955	SRSF1_HUMAN	VKVDGPRSPSYGR.3	VKVDGPRS[Ph]PSYGR	191927	109201	250838	208096	129247	130814	296893	186556	252905	220215	131802	121718
Q07955	SRSF1_HUMAN	YSPRHSR.2	YS[Ph]PRHS[Ph]R	6293.43	12972.2	9355.48	8364.87	11504.1	12224.7	451.674	9200.94	5704.07	9881.6	8417.56	10892.4
Q07960	RHG01_HUMAN	SDDSKSSSPELVTHLK.3	SDDS[Ph]KSSSPELVTHLK	5084.23	6375.68	17303.5	6733.41	7029.86	19311.5	3270.83	5158.79	4164.63	6168.8	5301.21	6297.26
Q07960	RHG01_HUMAN	SSSPELVTHLK.2	SSS[Ph]PELVTHLK	144015	333993	86396.5	324683	126572	91326.4	129116	257023	101131	357869	114804	97392.9
Q08170	SRSF4_HUMAN	SLRQSR.2	SLRQS[Ph]R	3122.95	14188.1	7238.93			16380.7		9069.28	7694.49
Q08945	SSRP1_HUMAN	EGMNPSYDEYADSDEDQHDAYLER.3	EGMNPSYDEYADS[Ph]DEDQHDAYLER	977986	1.1972e+06	937506	1.11982e+06	1.88343e+06	1.19364e+06	935210	1.21695e+06	935408	908326	1.12804e+06	1.3249e+06
Q08945	SSRP1_HUMAN	SKEFVSSDESSSGENK.2	SKEFVS[Ph]S[Ph]DES[Ph]S[Ph]SGENK		180343	57521.1		103278	96078.8	6377.95			12556.9	10629.8	124960
Q08999	RBL2_HUMAN	ADEICIAGSPLTPR.2	ADEIC[cam]IAGS[Ph]PLT[Ph]PR	19729.9		22555.7	9102.08		11366.7	21096.4	5591.66	14781.7	7749.79
Q08999	RBL2_HUMAN	DSSPVMR.2	DSS[Ph]PVMR	3974.13	1619.8	2276.44	679.355	3057.82	1019.04	3730.37	1642.75	2633.83	1723.83	434.959
Q08J23	NSUN2_HUMAN	AGEPNSPDAEEANSPDVTAGCDPAGVHPPR.3	AGEPNS[Ph]PDAEEANSPDVTAGC[cam]DPAGVHPPR	556778	691250	645224	956606	1.08481e+06	666039	593484	667563	602975	1.28893e+06	763517	289686
Q08J23	NSUN2_HUMAN	AGEPNSPDAEEANSPDVTAGCDPAGVHPPR.4	AGEPNS[Ph]PDAEEANSPDVTAGC[cam]DPAGVHPPR	213240	310956	218221	342480	331482	387018	234199	324689	196106	457427	400518	396342
Q09161	NCBP1_HUMAN	KTSDANETEDHLESLICK.3	KTS[Ph]DANETEDHLESLIC[cam]K	68284.6	64942	118193	41696.9	109504	208122	76399.8	34596.6	101931	53067.7	76233	107321
Q09161	NCBP1_HUMAN	RKTSDANETEDHLESLICK.3	RKT[Ph]SDANETEDHLESLIC[cam]K	7434.11	9187.5	9961.01	4327.64	14070.5	8196.47	10530.9	4626.44	7388.08	6317.67	7056.54
Q09161	NCBP1_HUMAN	RKTSDANETEDHLESLICK.4	RKT[Ph]SDANETEDHLESLIC[cam]K	22648.3	20464	21438	10769.5	12745.6	23111	24321.6	13861.1	19785.4	16983.8	18861.8	4577.04
Q09472	EP300_HUMAN	TEIKEEEDQPSTSATQSSPAPGQSK.3	TEIKEEEDQPSTSATQS[Ph]SPAPGQSK	13624.1	73047.4	4004.41		33963.5	13664.1	12395.5	34847.5	5081.32		36302.9	12916.9
Q09472	EP300_HUMAN	TEIKEEEDQPSTSATQSSPAPGQSK.3	TEIKEEEDQPSTSATQSS[Ph]PAPGQSK	11911.9	66518.2	3749.92		4921.8	12488.2	11020.1	31462.9	4054.5		32254.3	12404.9
Q09666	AHNK_HUMAN	ASLGSLEGEAEAEASSPK.2	AS[Ph]LGS[Ph]LEGEAEAEASSPK		77309.5			93782.3	88514.8		50865.3			61148.1	79988
Q09666	AHNK_HUMAN	ASLGSLEGEAEAEASSPK.2	AS[Ph]LGSLEGEAEAEASSPK		72432.7	2612.2		77046.8	50389.9		61466	1928.84		71135.6	80039.8
Q09666	AHNK_HUMAN	ASLGSLEGEAEAEASSPK.2	ASLGS[Ph]LEGEAEAEAS[Ph]SPK		117745		8656.84	58589.5	83086		66007.9			40357.5	77565.5
Q09666	AHNK_HUMAN	ASLGSLEGEAEAEASSPK.2	ASLGS[Ph]LEGEAEAEASS[Ph]PK		201052			79972.8	134282		101439			61853.3	124759
Q09666	AHNK_HUMAN	ASLGSLEGEAEAEASSPK.2	ASLGS[Ph]LEGEAEAEASSPK	2247.17	50612.6			52848.5	35654.5		44400			52447.3	57857.5
Q09666	AHNK_HUMAN	DIDISSPEFK.2	DIDIS[Ph]SPEFK		58176.1	2731.97	2574.33	51639.9	21082.1	4197.69	50035.9	585.26		58477	25423.9
Q09666	AHNK_HUMAN	DIDISSPEFK.2	DIDISS[Ph]PEFK		105925		3440.09	95563.4	41446.2		93393.2		2697.28	118092	49608.5
Q09666	AHNK_HUMAN	FKAEAPLPSPK.2	FKAEAPLPS[Ph]PK	2243.55	9401.34	933.723	2400.5	18855.3	26050.8		8957.21	224.803		17071.1
Q09666	AHNK_HUMAN	GGVTGSPEASISGSK.2	GGVTGS[Ph]PEASISGSK	2313.65	103513			123702	64274.2		48651.8			74543.1	66667.6
Q09666	AHNK_HUMAN	GHYEVTGSDDETGK.2	GHYEVTGS[Ph]DDETGK	2044.58	75667.7	2185.36	462.802	76608.3	18632.1	1914.8	40301.1	1253.53	66.0232	53940.2	19896.4
Q09666	AHNK_HUMAN	GHYEVTGSDDETGK.3	GHYEVTGS[Ph]DDETGK		5724.61			9254.43	3246.96		4464.76			4847.37	3685.47
Q09666	AHNK_HUMAN	KGDRSPEPGQTWTR.3	KGDRS[Ph]PEPGQTWTR		7363.53			16775.8	2609.47	1781.29	10414.8			13336.9	929.524
Q09666	AHNK_HUMAN	LKSEDGVEGDLGETQSR.2	LKS[Ph]EDGVEGDLGETQSR		18777.2			19387.3	20351.6		11638.5			21737.6
Q09666	AHNK_HUMAN	LKSEDGVEGDLGETQSR.3	LKS[Ph]EDGVEGDLGETQSR		19854.1			34394.4	38600.7		19271.5			27499.9
Q09666	AHNK_HUMAN	LPSGSGAASPTGSAVDIR.2	LPSGSGAAS[Ph]PTGSAVDIR		27735.7		730.84	48351.4	11830		38345.9			47976.3	12972.1
Q09666	AHNK_HUMAN	SNSFSDER.2	SNS[Ph]FSDER		14256.7			24342.3	3409.33		10555.4			14954	7429.88
Q09666	AHNK_HUMAN	SSKASLGSLEGEAEAEASSPK.3	SSKAS[Ph]LGS[Ph]LEGEAEAEASSPK		77860.2			41900.8	61277		71327.6			49616.4	59168.2
Q09666	AHNK_HUMAN	VDVKSPK.2	VDVKS[Ph]PK		6447.91			8494.4	2929.42		14609.4			12786.8
Q0JRZ9	FCHO2_HUMAN	HSPVQMNR.2	HS[Ph]PVQMNR	9927.8			3581.83	1837.91		8898.11			2735.29	3421.47
Q12789	TF3C1_HUMAN	KNSSTDQGSDEEGSLQK.2	KNS[Ph]STDQGS[Ph]DEEGSLQK	2434.8	7464.69	2930.4			5823.04	1348.66	2799.23				4656.78
Q12789	TF3C1_HUMAN	NSSTDQGSDEEGSLQK.2	NSSTDQGS[Ph]DEEGSLQK	6197.13	15608.3	4895.77	5348.31	16018.6	11184.2	10919.8	12467.4	10395.1	10321	20762.2	21059.3
Q12802	AKP13_HUMAN	ALQLSNSPGASSAFLK.2	ALQLSNS[Ph]PGASSAFLK	3970.15	3866.8	13439.9	18412.3	7574.63		3767.81	5791.72	16428.8	16306.5	5667.71
Q12802	AKP13_HUMAN	DMAECSTPLPEDCSPTHSPR.3	DMAEC[cam]STPLPEDC[cam]S[Ph]PTHSPR	3055.05	13452.4	7664.35	10659	5695.23		2239.95	14961	8275	8650.97	7065.21
Q12802	AKP13_HUMAN	FLSHSTDSLNK.2	FLSHS[Ph]TDS[Ph]LNK	14665.6	50404.8	26837.8	28086.5	30226.4		20649.4	59166	29565.4	47952.6	25451.7	47888.9
Q12802	AKP13_HUMAN	FLSHSTDSLNK.2	FLSHS[Ph]TDSLNK	22373.9	39900.2	35833.8	30753.1	60047.3	18674.9	21276.2	60234.3	37478.3	31717.7	30844.8	18865
Q12802	AKP13_HUMAN	RNSISR.2	RNS[Ph]ISR			898.214					192.882	73.2284
Q12802	AKP13_HUMAN	SGSLDSELSVSPK.2	SGSLDSELSVS[Ph]PK	28121.7	70951.6	37141.7	68872.2	51020.2	32975.9	14881.7	65398.3	31215.2	41685.4	38346.6
Q12802	AKP13_HUMAN	SLSPFRR.2	SLS[Ph]PFRR	7349.42	3532.93	3865.81	1061.26	1355.96		854.777	4237.15	4802.22	569.719	1170.05
Q12802	AKP13_HUMAN	SLSRPSSLIEQEK.2	S[Ph]LSRPSSLIEQEK	859.883	4119.29	4486.64	5411.91	465.424			3617.1	4273.69	4291.99	1983.64
Q12802	AKP13_HUMAN	SLSRPSSLIEQEK.2	SLS[Ph]RPSSLIEQEK	2040.74	3164.28	7042.08	9145.94	1284.08		2385.52	4345.95	5073.48	7883.3	3318.23
Q12802	AKP13_HUMAN	SLSRPSSLIEQEK.2	SLSRPSS[Ph]LIEQEK	1764.28	4766.87	8441.02	10469.4			3051.17	5424.06	6947.03	9227.99	3809.76
Q12802	AKP13_HUMAN	VDSLVSLSEEDLESDQR.2	VDS[Ph]LVS[Ph]LSEEDLESDQR	32272.3	80516.5	57724.2	84984	69150	93018.7	34741.8	77498.5	69433.3	93808.7	52382.1	154911
Q12802	AKP13_HUMAN	VDSLVSLSEEDLESDQR.2	VDSLVS[Ph]LS[Ph]EEDLESDQR	3212.31	13710.5	9878.6	14348.5	3120.42	21269.7	8108.51	17938.9	13971.3	14163.4	9685.66	22624.7
Q12830	BPTF_HUMAN	SPILEEK.2	S[Ph]PILEEK	16090.8	6931.17	16908.2	9640.01	17085.4	31812.1	22677.5	18676	19404.4	13192.6	9492.83	34700.2
Q12830	BPTF_HUMAN	VHRPRSPILEEK.3	VHRPRS[Ph]PILEEK	1090.72			5352.97	3848.6		10867.7	8419.52		3106.86	10059.3
Q12830	BPTF_HUMAN	VQSPSQTR.2	VQS[Ph]PSQTR	5309.79	3853.55	2368.25	2258.97	3534.49	4365.89	5421.15	7101.69	3864.83		3840.26
Q12851	M4K2_HUMAN	TPSEIQFHQVK.2	T[Ph]PSEIQFHQVK	2347.87	4913.41	5352.97	7154.14	2648.06	3589.41		5545.51	7506.25	4661.92	3858.45
Q12851	M4K2_HUMAN	TPSEIQFHQVK.2	TPS[Ph]EIQFHQVK	5132.42	9841.06	12673.5	20747.9	8804.61	8627.66	4709.79	11695.2	22495.5	12596.7	9460.3
Q12872	SFSWA_HUMAN	SGVSSDNEDDDDEEDGNYLHPSLFASK.3	SGVSS[Ph]DNEDDDDEEDGNYLHPSLFASK	75237.5	172949	129796	115721	131722	208397	89582	160165	109741	130801	100370	245967
Q12873	CHD3_HUMAN	ELQGDGPPSSPTNDPTVK.2	ELQGDGPPS[Ph]SPTNDPTVK	44861.3	24874.5	12202.5	9632.96	46307.2		36061.2	18304.5	18687.6	9953.43	52442.8
Q12873	CHD3_HUMAN	ELQGDGPPSSPTNDPTVK.2	ELQGDGPPSS[Ph]PTNDPTVK	44920.9	26852.6	13752.5	10874	45979.9	11309.7	40976.4	18886.1	20039.5	10869.4	52199.8	7149.96
Q12873	CHD3_HUMAN	KNDMDEPPPLDYGSGEDDGKSDK.3	KNDMDEPPPLDYGS[Ph]GEDDGKSDK	32564.5		9882.41	7481.2	9082.67		34190.3	10836.1	6101.88	9759.11	19042.4
Q12873	CHD3_HUMAN	METEADAPSPAPSLGER.2	METEADAPS[Ph]PAPS[Ph]LGER	180473	98636.6	49280.1	33187.3	159222	95337.3	217452	101961	54681.3	72313.3	136027	128242
Q12888	TP53B_HUMAN	AADISLDNLVEGK.2	AADIS[Ph]LDNLVEGK	5873.12		1669.96	8235.26	1178.24		5152.32	862.044	4346.48	12756.4	2043.04
Q12888	TP53B_HUMAN	GGPGKLSPR.2	GGPGKLS[Ph]PR	50475.1	40699.3	36733.7	65747.8	30229.8	26041.2	65693.4	66725.8	41301	53184.2	41693	21331.2
Q12888	TP53B_HUMAN	IDEDGENTQIEDTEPMSPVLNSK.3	IDEDGENTQIEDTEPMS[Ph]PVLNSK	25844	23997.8	12642.2	28032.8	44886.9	9851.67	21636.6	26597.8	15856.3	20244	34883
Q12888	TP53B_HUMAN	LITSEEERSPAKR.3	LITSEEERS[Ph]PAKR	8874.97	6094.11	13073.4	14816.5	13425	4126.41	6550.56	9780.52	11840.1	8774.99	7280.25	1864.41
Q12888	TP53B_HUMAN	LMLSTSEYSQSPK.2	LMLSTSEY[Ph]SQS[Ph]PK	13169.9	9321.58	4819.47	8245.69	7483.76	9385.22	12585.6	11943.3	4565.69	10232.6	9101.67	19072.1
Q12888	TP53B_HUMAN	LMLSTSEYSQSPK.2	LMLSTSEYS[Ph]QS[Ph]PK	11203.6	7945.17	4427.91	7002.67	7413.15	8914.85	10879.4	10717.2	4049.63	8547.69	8061.25	16727.1
Q12888	TP53B_HUMAN	LMLSTSEYSQSPK.2	LMLSTSEYSQS[Ph]PK	8541.1		1641.82	3062.78	11832.9		7921.23	2438.23	8824.67	1157.59	3506.05
Q12888	TP53B_HUMAN	NSPEDLGLSLTGDSCK.2	NS[Ph]PEDLGLSLTGDSC[cam]K	176277	310586	129241	296666	198927	247061	195714	293929	121807	258556	193717	263940
Q12888	TP53B_HUMAN	SEDMPFSPK.2	SEDMPFS[Ph]PK	61268.6	62599.5	27674.6	76733.3	52843.2	24150.5	66629.5	90448.8	30106.9	76968.8	53053.4	35074.7
Q12888	TP53B_HUMAN	SPEPEVLSTQEDLFDQSNK.2	S[Ph]PEPEVLSTQEDLFDQSNK	52191.8	96057.1	37029.2	62649	87543.3	84474.4	55274.1	63643.1	40305.2	62610	53061	113801
Q12888	TP53B_HUMAN	STPFIVPSSPTEQEGR.2	STPFIVPSS[Ph]PTEQEGR	230421	336443	123732	213969	375235	196467	248868	398085	124023	163345	315824	118858
Q12888	TP53B_HUMAN	TSSGTSLSAMHSSGSSGK.2	TSS[Ph]GTSLSAMHSSGSSGK	21672.7	40487.1	22991.5	24464.6	83108.1	28412.6	18648.6	46772.6	24561.8	19787.5	30518.2	25920.8
Q12888	TP53B_HUMAN	TSSGTSLSAMHSSGSSGK.3	TSS[Ph]GTSLSAMHSSGSSGK	3444.72	6217.73	5857.82	5387.73	5697.97	8098.18	5023.54	7719.49	4312.66	4361.01	5327.97	7057.46
Q12906	ILF3_HUMAN	FNYSGSGGR.2	FNYSGS[Ph]GGR	1402.74		486.521	1142.3	828.702		2156.74		2105	3614.42
Q12906	ILF3_HUMAN	RPMEEDGEEKSPSK.2	RPM[ox]EEDGEEKS[Ph]PSK	11247.1	9602.02	11581.1	15374.4	27087.9	9946.15	14376.7	8970.54	12783.3	19451.2	7021.76	7770
Q12906	ILF3_HUMAN	RPMEEDGEEKSPSK.2	RPMEEDGEEKS[Ph]PSK	153658	148552	110805	172924	77456.8	105652	144715	121018	140545	160526	101201	55972.8
Q12906	ILF3_HUMAN	RPMEEDGEEKSPSK.3	RPM[ox]EEDGEEKS[Ph]PSK	19642.9	27534.8	23493.8	31117.7	25578.3		17325.4	16065.8	24096.2	17993.5	15269.9	35814.8
Q12906	ILF3_HUMAN	RPMEEDGEEKSPSK.3	RPMEEDGEEKS[Ph]PSK	348814	315878	238261	231121	124260	212688	299401	259199	273693	266778	208960	122222
Q12912	LRMP_HUMAN	KPSLSEK.2	KPS[Ph]LSEK	9154.51	3998.32	8828.49	4222.12	11101.6	10566.9	6796.67	10061.5	10014.8	2896.53	8938.6	4250.47
Q12912	LRMP_HUMAN	SASLNSKPSSLR.2	S[Ph]ASLNSKPSSLR	26201.1	10383.3	27073.1	8591.53	9431.83	14666.4	10246.2	9158.57	20554.8	8177.39	14604.1
Q12912	LRMP_HUMAN	SASLNSKPSSLR.2	SAS[Ph]LNSKPSSLR	44663.1	17545.5	43672.7	14937.3	16339.3	25974.1	16403.1	16297.6	28783.9	12348.4	26699.9	7174.47
Q12912	LRMP_HUMAN	SASPTIEAQGTSPAHDNIAFQDSTSK.3	SAS[Ph]PTIEAQGTSPAHDNIAFQDSTSK	179327	215748	182386	109936	413874	115551	181032	277577	263367	131530	242892	104160
Q12912	LRMP_HUMAN	TKDDSEPSGEETVER.2	TKDDS[Ph]EPS[Ph]GEETVER	26171.7	90167.7	36598.4	27123.4	27176.1	23844.3	36660.5	55299.2	33287.4	49825.7	34298.3	32277.1
Q12912	LRMP_HUMAN	TRKPSLSEK.2	TRKPS[Ph]LSEK	11184.1	18925.3	9384.9	9742.27	21537.6	7863.87	10417.4	14310.2	9858.39	6651.69	18631.7	5301.34
Q12955	ANK3_HUMAN	RQSFASLALR.2	RQS[Ph]FASLALR	5761.91						3402.57
Q12982	BNIP2_HUMAN	KGSITEYTAAEEK.2	KGS[Ph]ITEYTAAEEK	97659.9	91851.6	89265.8	67757.1	125691	104880	81849.3	54766	110541	52313.2	94872.9	85406.9
Q12982	BNIP2_HUMAN	KGSITEYTAAEEK.3	KGS[Ph]ITEYTAAEEK	1798.35		4112.61	2928.41	3540.21	3393.67	7052.24	1104.74	3668.65	1775.4	3430.57
Q12986	NFX1_HUMAN	NYSSPPPCHLSR.2	NYSS[Ph]PPPC[cam]HLSR	14672.3		7364.87	7360.4	48511.8	9852.59		7240.66	9951.65	6208.33	37159.1
Q12996	CSTF3_HUMAN	RPNEDSDEDEEK.2	RPNEDS[Ph]DEDEEK	5139.92	6079.74	4468.11	6035.39	9460.47		3532.14	3497.05	3916.36	5653.54	7417.77	5331.62
Q12996	CSTF3_HUMAN	RPNEDSDEDEEKGAVVPPVHDIYR.3	RPNEDS[Ph]DEDEEKGAVVPPVHDIYR	47945.3	28009.7	29953.1	66660.7	101121	17854.4	57870	38889.5	30661.7	53152.6	40175	17074.2
Q12996	CSTF3_HUMAN	RPNEDSDEDEEKGAVVPPVHDIYR.4	RPNEDS[Ph]DEDEEKGAVVPPVHDIYR	957195	734918	662668	1.33014e+06	617180	613496	1.29073e+06	1.03453e+06	603420	1.03013e+06	910050	502608
Q13029	PRDM2_HUMAN	TASPPALPK.2	TAS[Ph]PPALPK	22127.5	38343.9	3735.25	18116.2	33023.7	33257.1	34709.8	68417.8	7011.24	19324.6	40102.7	13486.3
Q13045	FLII_HUMAN	NAEAVLQSPGLSGK.2	NAEAVLQS[Ph]PGLSGK	69975.4	65481.9	113566	209983	128374	75819	82346.9	42403.3	124298	201452	104582
Q13085	ACACA_HUMAN	SSMSGLHLVK.2	SSMS[Ph]GLHLVK	116767	27361.5	63650.8	87860	57464.6	43948.4	100642	41478.2	69009.4	71994.4	88307.3	29028.5
Q13098	CSN1_HUMAN	EGSQGELTPANSQSR.2	EGS[Ph]QGELTPANSQSR	16764.1	24145.2	25947.1	16932.5	19488.1	24558.4	11906.6	17795.9	24873.4	17755.7	24454.8	8530.02
Q13098	CSN1_HUMAN	NQIHVKSPPREGSQGELTPANSQSR.4	NQIHVKS[Ph]PPREGSQGELTPANSQSR	1266.27		2625.29	6888.03	2718.56		2447.01	1746.8	1953.35	11458.8	6070.93
Q13111	CAF1A_HUMAN	GLLSNHTGSPR.2	GLLSNHTGS[Ph]PR	10862.8	5702.34	15832	8767.26	3544.84	4172.67	11535.8	5931.96	17964.4	7437.08	4286.67	6375.65
Q13111	CAF1A_HUMAN	SCPELTSGPR.2	S[Ph]C[cam]PELTSGPR	33088.9	21222.7	32397.2	25206.4	16153.1	36469.3	34431.3	23282.8	35648.3	26743.4	14165.8	48579.5
Q13111	CAF1A_HUMAN	SPSTTYLHTPTPSEDAAIPSK.3	SPS[Ph]TTYLHTPTPSEDAAIPSK	71930.2	72327.7	113058	65689.7	16599.7	105762	79535.3	62619	107375	71056.2	17986	103432
Q13112	CAF1B_HUMAN	GSSPGPRPVEGTPASR.2	GSS[Ph]PGPRPVEGTPASR	77309.4	53737.2	83413.7	74319.2	19242.3	63019.9	72860.1	62867.9	100306	85304.6	39802.5	60547.1
Q13112	CAF1B_HUMAN	GSSPGPRPVEGTPASR.3	GS[Ph]SPGPRPVEGTPASR	97338.7	71985.2	144577	124517	57091.1	129000	106002	82310.3	168683	95498.9	46316.4	120174
Q13112	CAF1B_HUMAN	GSSPGPRPVEGTPASR.3	GSS[Ph]PGPRPVEGTPASR	98713.2	73829.8	147225	127112	57377.2	132008	108233	83905	171542	97560.8	47447.1	123314
Q13112	CAF1B_HUMAN	TQDPSSPGTTPPQAR.2	TQDPSS[Ph]PGTT[Ph]PPQAR	38381.9	22593.7	63684.3	42553.2	9801.55	32844.3	41706.8	30055.8	64629.9	54594.2	21803.5	70111.5
Q13112	CAF1B_HUMAN	TQDPSSPGTTPPQAR.2	TQDPSS[Ph]PGTTPPQAR	36394.7	25791.6	57621.3	42143.3	8474.95	22494	38507.8	31633	63590.6	40063.8	18925.3	20430.2
Q13129	RLF_HUMAN	SPSAIPEQNHSLNDQAK.2	S[Ph]PSAIPEQNHSLNDQAK	13679.9	42444.6	5856.01	8936.79		11179.9	14737.2	17139.1	5287.6	13312.7	6191.75	11951.8
Q13136	LIPA1_HUMAN	GALHTVSHEDIR.2	GALHTVS[Ph]HEDIR	2643.16	2222.63	1200.81	5318.53	3319.89		3150.05		1806.67	8891.23	3221.09
Q13136	LIPA1_HUMAN	GALHTVSHEDIR.3	GALHTVS[Ph]HEDIR	1853.95	2349.56	494.674	5454.96	1596.81		2198.09	1677.4	1456	5853.86	1411.67	6564.72
Q13136	LIPA1_HUMAN	RSSDGSLSHEEDLAK.3	RSSDGS[Ph]LSHEEDLAK	2415.26		6468.05	2223.52	2828.17		2672.17	2563.54	6320.44	1615.51	3844.1
Q13144	EI2BE_HUMAN	GGSPQMDDIK.2	GGS[Ph]PQMDDIK	26964.7	19408.1	37346.4	50871.1	71524.6	41015.9	25353.1	23284.3	33216.4	39441.6	63417.1	40217.3
Q13153	PAK1_HUMAN	AVSETPAVPPVSEDEDDDDDDATPPPVIAPRPEHTK.4	AVSETPAVPPVS[Ph]EDEDDDDDDATPPPVIAPRPEHTK	8929.49	126888	4407.14	186705	327716			137733		205651	199083
Q13177	PAK2_HUMAN	GTEAPAVVTEEEDDDEETAPPVIAPRPDHTK.4	GTEAPAVVT[Ph]EEEDDDEETAPPVIAPRPDHTK	23893.7		8513.85	19750.7	28747		34836.8	29619.6	13778.6	22634.1	29638.9
Q13177	PAK2_HUMAN	SDNGELEDKPPAPPVR.2	[ac]S[Ph]DNGELEDKPPAPPVR	609083	502998	539554	450936	460880	539291	641925	368922	535531	588300	401510	617027
Q13177	PAK2_HUMAN	SDNGELEDKPPAPPVR.3	[ac]S[Ph]DNGELEDKPPAPPVR	112569	105969	82014.3	63068.9	70949.2	110146	91123.7	89017	65454	72069	83539.8	142759
Q13177	PAK2_HUMAN	YLSFTPPEK.2	YLS[Ph]FTPPEK	113844	201446	317761	109010	322678	180750	122275	232482	335430	62409.2	274816	48921.5
Q13185	CBX3_HUMAN	KSLSDSESDDSK.2	KSLS[Ph]DSESDDSK	31809.5	34725.9	19875.2	12310.8	21298.9	7203.84	29688.8	29569.1	17619.4	12536.2	22312	20910.9
Q13185	CBX3_HUMAN	LTWHSCPEDEAQ.2	LT[Ph]WHSC[cam]PEDEAQ	4553.08	1865.67	5327.54	6430.95	8305.57		3972.15	2547.36	9243.75	9140.37	7912.96
Q13185	CBX3_HUMAN	LTWHSCPEDEAQ.2	LTWHS[Ph]C[cam]PEDEAQ	4963.2	1198.26	5469.98	6656.11	8492.59		4224.62	2806.79	9533.8	10149.3	8335.44
Q13185	CBX3_HUMAN	RKSLSDSESDDSK.2	RKS[Ph]LS[Ph]DS[Ph]ESDDSK	4604.29	5815.82	6798.44	3970.77	5157.38	1904.08	4683.95	3093.82	3381.73	5662.47	4817.13
Q13185	CBX3_HUMAN	RKSLSDSESDDSK.2	RKS[Ph]LS[Ph]DSESDDSK	20976.7	33879.1	36173.4	8167.73	38081.2	19184.6	21560.9	22714.6	32643.2	20319	16816.1	21187.4
Q13185	CBX3_HUMAN	RKSLSDSESDDSK.2	RKS[Ph]LSDS[Ph]ESDDSK	21748	32775.2	35626.1	8347.47	37471.1	18827	22006.6	22383.3	31681.7	20447.7	16771.2	20958.6
Q13185	CBX3_HUMAN	RKSLSDSESDDSK.2	RKS[Ph]LSDSES[Ph]DDSK	19187.5	29054	31820.6	7097.7	32746.4	17306	19241.2	20059.5	27910.5	18726.8	13274.5	18929.9
Q13185	CBX3_HUMAN	RKSLSDSESDDSK.2	RKS[Ph]LSDSESDDSK	7089.42	6705.27	10167.4	4364.74	5018.98	8783.55	5567.67	5502.67	8183.6	6363.89	6169.42
Q13185	CBX3_HUMAN	RKSLSDSESDDSK.3	RKS[Ph]LS[Ph]DS[Ph]ESDDSK	1928.83	3190.96			1776	1278.13	1657.38	2237.97	3188.26
Q13185	CBX3_HUMAN	RKSLSDSESDDSK.3	RKS[Ph]LS[Ph]DSESDDSK	21634.3	21660.6	29429.5	20920.6	11654.8	29262.8	18268.4	23524	27723.6	10344.7	23138	25345.3
Q13185	CBX3_HUMAN	RKSLSDSESDDSK.3	RKS[Ph]LSDSESDDSK	2406.29	2851.95	3302.65		5399.33	3665.56	3994.83		3005.48		1800.42
Q13185	CBX3_HUMAN	SLSDSESDDSK.2	S[Ph]LS[Ph]DSESDDSK	3553.59	2689.19	1837.1			3228.44		1409.09	2769.36	3243.39		1901.72
Q13185	CBX3_HUMAN	SLSDSESDDSK.2	SLS[Ph]DS[Ph]ESDDSK	8586.5	1636.1	4405.47	318.957	1205.95	8085.39		3023.49	2422.37		1094.46	4076.25
Q13185	CBX3_HUMAN	SLSDSESDDSK.2	SLS[Ph]DSESDDSK	79219	180620	39396.8	40904.3	104493	72086.7	100721	94893.1	57267.1	23593.9	96408.9	85407.4
Q13200	PSMD2_HUMAN	APVQPQQSPAAAPGGTDEKPSGK.3	APVQPQQS[Ph]PAAAPGGTDEKPSGK	55972.1	59131.7	34238.7	81453.6	72475.7	39455.2	41791.1	63239.3	40554.2	87864.1	123563	48675.7
Q13200	PSMD2_HUMAN	DKAPVQPQQSPAAAPGGTDEKPSGK.3	DKAPVQPQQS[Ph]PAAAPGGTDEKPSGK	80219	120377	52628.7	93333.4	58029.7	77083.9	56398.7	92600.9	50206.6	126985	124095	93237
Q13200	PSMD2_HUMAN	DKAPVQPQQSPAAAPGGTDEKPSGK.4	DKAPVQPQQS[Ph]PAAAPGGTDEKPSGK	21934.3	29713.7	15771.2	29603.5	17981.3	29159.9	15364.1	26188.9	42773.2	32723.3	28739.7	38465.3
Q13200	PSMD2_HUMAN	FGGSGSQVDSAR.2	FGGS[Ph]GSQVDSAR	5559.39	8150.78	7673.47	10659.6	6263.35		8740.08	13191.1		12996.6	14431.4
Q13206	DDX10_HUMAN	APSLTNDEVEEFR.2	APS[Ph]LTNDEVEEFR	17227.8		25004.1	37364.4	9237.8		13999.1		12354.7	23683	7355.5
Q13242	SRSF9_HUMAN	GRDSPYQSR.2	GRDS[Ph]PYQSR	128071	88649.5	91190.6	93915.2	93663.4	133195	99393	69712.6	85894.5	103884	87116.1	89361
Q13242	SRSF9_HUMAN	GSPHYFSPFRPY.2	GS[Ph]PHYFS[Ph]PFRPY	273432	146636	427859	378904	73082.8	476008	212263	167132	372828	328780	71962.9	694455
Q13242	SRSF9_HUMAN	GSPHYFSPFRPY.2	GS[Ph]PHYFSPFRPY	264960	178092	216178	274957	148816	270345	243718	226105	222659	233499	95186.2	376751
Q13242	SRSF9_HUMAN	GSPHYFSPFRPY.3	GS[Ph]PHYFS[Ph]PFRPY	82227.9	63083.9	130724	108761	22896.5	191722	64949.6	68037.3	111109	88761.9	25324.4	272532
Q13242	SRSF9_HUMAN	GSPHYFSPFRPY.3	GS[Ph]PHYFSPFRPY	71464.3	60667.4	63325	71418.8	47648.9	89421.6	68233.8	78712.7	61881.1	56895.7	28853.7	116976
Q13242	SRSF9_HUMAN	STSYGYSRSR.2	STSYGYS[Ph]RS[Ph]R				875.288	27971.6	19940.4	13158	10916.2		1288.17	37630.9	15007.5
Q13243	SRSF5_HUMAN	SVSRSPVPEK.2	S[Ph]VS[Ph]RS[Ph]PVPEK	73272.5	92331.3	70511.7	41935	82718.6	121230	53724.7	57388.9	49303.9	50783.1	60246.9	146935
Q13243	SRSF5_HUMAN	SVSRSPVPEK.2	S[Ph]VS[Ph]RSPVPEK	6063.46		13228.9	16676.4	10747.9	9032.34	5530.09	6915.26	13270.4	20650.3	8469.26	9978.48
Q13243	SRSF5_HUMAN	SVSRSPVPEK.2	S[Ph]VSRS[Ph]PVPEK	6063.46		13228.9	16676.3	10747.9	9731.36	5530.09	6915.26	13270.4	20650.3	8469.26	9978.48
Q13243;Q08170;Q13247	SRSF5_HUMAN;SRSF4_HUMAN;SRSF6_HUMAN	LIVENLSSR.2	LIVENLS[Ph]SR	1211.79	4667.65	1471.88	5474.44	4368.04	3099.12	1622.13	12821.7	3408.66	7310.43	6994.19
Q13247	SRSF6_HUMAN	ARSVSPPPK.2	ARS[Ph]VS[Ph]PPPK	315375	287253	331492	237030	273328	390954	315519	324815	301525	282480	425583	507030
Q13247	SRSF6_HUMAN	ARSVSPPPKR.2	ARS[Ph]VS[Ph]PPPKR	265221	355024	292106	236425	321344	484560	357254	279484	275339	298517	359304	469238
Q13247	SRSF6_HUMAN	ARSVSPPPKR.3	ARS[Ph]VS[Ph]PPPKR	349242	304608	464491	364917	305772	613889	514356	354628	457408	369205	362361	581366
Q13247	SRSF6_HUMAN	SNSPLPVPPSK.2	SNS[Ph]PLPVPPSK	1.40923e+06	943917	1.75112e+06	790714	1.24023e+06	1.41929e+06	1.39568e+06	838169	1.31931e+06	519104	1.26755e+06	1.39973e+06
Q13247	SRSF6_HUMAN	SVSPPPK.2	S[Ph]VS[Ph]PPPK	49970.8	39098.8	72613.9	28793.5	52218	88415.3	49617.4	54607.7	55261.8	32942.2	51143.9	85899.1
Q13247	SRSF6_HUMAN	SVSPPPKR.2	S[Ph]VS[Ph]PPPKR	561299	603554	641717	423047	580239	827974	687222	578955	666707	517035	705649	1.05012e+06
Q13263	TIF1B_HUMAN	AASAAAASAAAASAASGSPGPGEGSAGGEK.3	[ac]AASAAAAS[Ph]AAAASAASGSPGPGEGSAGGEK	7.59269e+06	1.06454e+06	4.33922e+06	2.74912e+06	786262	1.28719e+06	6.60906e+06	459043	4.33018e+06	2.72681e+06	1.07268e+07	961302
Q13263	TIF1B_HUMAN	AASAAAASAAAASAASGSPGPGEGSAGGEK.3	[ac]AASAAAASAAAASAAS[Ph]GSPGPGEGSAGGEK	6.15001e+06	372014	3.64348e+06	2.20391e+06	609162	906804	5.40922e+06	4.85625e+06	3.47808e+06	2.18109e+06	8.71361e+06
Q13263	TIF1B_HUMAN	AASAAAASAAAASAASGSPGPGEGSAGGEK.3	[ac]AASAAAASAAAASAASGS[Ph]PGPGEGSAGGEK	9.39014e+06	9.48627e+06	5.61385e+06	3.41351e+06	3.65708e+07	1.24689e+07	8.19675e+06	9.21655e+06	5.35581e+06	3.39994e+06	1.33284e+07	1.50044e+07
Q13263	TIF1B_HUMAN	AASAAAASAAAASAASGSPGPGEGSAGGEKR.3	[ac]AASAAAASAAAAS[Ph]AASGSPGPGEGSAGGEKR	2.93879e+06	3.00036e+06	1.33434e+06	833294	5.02875e+06	2.41724e+06	3.71275e+06	3.62934e+06	1.28075e+06	1.12198e+06	4.15906e+06	2.40288e+06
Q13263	TIF1B_HUMAN	AASAAAASAAAASAASGSPGPGEGSAGGEKR.3	[ac]AASAAAASAAAASAASGS[Ph]PGPGEGSAGGEKR	3.47022e+06	3.58639e+06	1.5905e+06	988730	5.94399e+06	2.8795e+06	4.38918e+06	4.28768e+06	1.51958e+06	1.32972e+06	4.90708e+06	2.86075e+06
Q13263	TIF1B_HUMAN	LASPSGSTSSGLEVVAPEGTSAPGGGPGTLDDSATICR.3	LASPS[Ph]GSTSSGLEVVAPEGTSAPGGGPGTLDDSATIC[cam]R	175678	211130	87267.5	90191.9	743360	220533	188810	193393	98225.9	110046	293583	280435
Q13263	TIF1B_HUMAN	SGEGEVSGLMR.2	S[Ph]GEGEVSGLM[ox]R	4358.09	8961.47	2837.97	3087.57	11473.3	25439.5	4480.52	3434.06	1751.61	2542.97	6164.09	16512.2
Q13263	TIF1B_HUMAN	SGEGEVSGLMR.2	S[Ph]GEGEVSGLMR	124213	104578	62564.9	42495.5	109122	297574	113620	104071	57285.2	45802.2	129978	211410
Q13263	TIF1B_HUMAN	SRSGEGEVSGLMR.2	SRS[Ph]GEGEVSGLMR	28745.2	18623.6	17281.2	10607.1	29596	63798.6	31251.2	24713.7	23724.5	10353.5	30428.1	18898.9
Q13263	TIF1B_HUMAN	SRSGEGEVSGLMR.3	S[Ph]RSGEGEVSGLMR	26942.5	25352.8	20726.3	8584.67	26785.4	63345	32252	29905.8	21692.7	7920.51	25966.5	27619.4
Q13263	TIF1B_HUMAN	SRSGEGEVSGLMR.3	SRS[Ph]GEGEVSGLMR	26015	24718.8	19609.4	8465.27	26044.8	61232.9	31214.9	28664.2	21377.1	7746.57	25087.2	26725.3
Q13283	G3BP1_HUMAN	SSSPAPADIAQTVQEDLR.2	SSS[Ph]PAPADIAQTVQEDLR	660746	753132	1.13016e+06	1.05833e+06	833850	873110	600932	805552	1.27397e+06	952229	713748	881496
Q13283	G3BP1_HUMAN	SSSPAPADIAQTVQEDLR.3	S[Ph]SSPAPADIAQTVQEDLR	132716	132734	177041	158543	120515	150635	96880.8	140316	193957	130579	116531	150027
Q13283	G3BP1_HUMAN	SSSPAPADIAQTVQEDLR.3	SSS[Ph]PAPADIAQTVQEDLR	135415	133531	180168	161767	123075	153789	98474.6	143274	197668	132813	119036	153191
Q13283	G3BP1_HUMAN	YQDEVFGGFVTEPQEESEEEVEEPEER.3	YQDEVFGGFVTEPQEES[Ph]EEEVEEPEER	1.3663e+06	1.67399e+06	2.11639e+06	2.26223e+06	4.67161e+06	1.50196e+06	1.1357e+06	1.69952e+06	2.46795e+06	1.7213e+06	2.49845e+06	1.60543e+06
Q13325;Q96PK6;Q9BQ04;Q9BWF3	IFIT5_HUMAN;RBM14_HUMAN;RBM4B_HUMAN;RBM4_HUMAN	DRSPLR.2	DRS[Ph]PLR	55451.7	52713.7	93543	128533	76278.5	74966.2	71195.8	75912.7	101895	72918.1	55931.5	52525.4
Q13330	MTA1_HUMAN	SNMSPHGLPAR.2	SNMS[Ph]PHGLPAR	62443.3	32161.8	21484.1	17305	16761.7	21023.9	64525.4	29083	28142.1	16909.1	26626.3	17945.6
Q13330	MTA1_HUMAN	SNMSPHGLPAR.3	SNMS[Ph]PHGLPAR	6935.26	766.216	3279.67	3169.11	2204.87	2384.24	11709.4	4162.49	5556.68	2057.97	2210.9	2863.02
Q13330	MTA1_HUMAN	VAPVINNGSPTILGK.2	VAPVINNGS[Ph]PTILGK	41091.5	23860.2	51816.8	31224.1	14054	25367.9	43508.8	21248	55100.9	26624.5	15860.1	23772.7
Q13415	ORC1_HUMAN	ETGLSYTEDDKKASPEHR.3	ETGLSYTEDDKKAS[Ph]PEHR	4850.82	3737.59	9281.68	12167.1	12282.3			3823	8620.85	10677.7	11624.5
Q13422	IKZF1_HUMAN	AASENSQDALR.2	AASENS[Ph]QDALR	9755.41	36126.1	10620.3	31853	67181.4	6944.46	11915.5	42662.7	13293.5	36208.4	85530.7	10243.8
Q13422	IKZF1_HUMAN	VETQSDEENGR.2	VETQS[Ph]DEENGR	12733.4	6265.97	2089.75	15528.3	5582.95		12168.7	3599.61	7149.1		22528.8
Q13425	SNTB2_HUMAN	GLGPPSPPAPPR.2	GLGPPS[Ph]PPAPPR	109189	44310.3	42494.5	92120.2	44448.4	44071	101776	56196.8	38386.9	65374.4	106506
Q13425	SNTB2_HUMAN	GPAGEAGASPPVR.2	GPAGEAGAS[Ph]PPVR	14690.8	5078.7	4928.79	19552	20405.8		12618.6	8056.71	4894.25	10784	15883.3	6404.69
Q13425	SNTB2_HUMAN	SPSLGSDLTFATR.2	S[Ph]PSLGSDLTFATR	21021.4	17116.5	7939.31	31760.5	20341		17568	10606.2	6868.61	24764.6	17300.2
Q13427	PPIG_HUMAN	ADRDQSPFSK.2	ADRDQS[Ph]PFSK	33467.7	37506.2	31391.1	24407.6	79664.5	30331.3	32150.3	40545.3	38629.2	28682	54716.2	26553.2
Q13427	PPIG_HUMAN	ADRDQSPFSK.3	ADRDQS[Ph]PFSK	244.041	395.831	686.793	892.768	2923.56			1093.52			600.085
Q13427	PPIG_HUMAN	DQSPFSK.1	DQS[Ph]PFSK	85854.8	155995	76731.2	77573.4	80448.8	109781	77235	141592	87866.5	86038.1	172463	127610
Q13427	PPIG_HUMAN	DQSPFSK.2	DQS[Ph]PFSK	27667.4	25643.9	40270.9	38901.9	87519.2	48359.3	34840.8	58103	45770	30306.7	37102.5	82233.5
Q13427	PPIG_HUMAN	ENQRSPVR.2	ENQRS[Ph]PVR	12481.4	15543.3	16825	18525.2	53836.7	10171.2	12531.1	33553.6	13962.4	4725.37	38723	6935.76
Q13427	PPIG_HUMAN	FRRSETPPHWR.3	FRRS[Ph]ET[Ph]PPHWR	253566	221329	188517	162002	295174	284488	274294	308988	146004	187733	259239	315837
Q13427	PPIG_HUMAN	FRRSETPPHWR.4	FRRS[Ph]ET[Ph]PPHWR	33180	29132	24349.2	20291	23942.2	34403.1	31779.6	39378.8	20324.3	25049.3	37656.9	38984.4
Q13427	PPIG_HUMAN	IRSSVEKENQK.2	IRSS[Ph]VEKENQK	4922.53		5198.51	6117.25		10534.8	8522.19	7207.46		10456.4	9766.68
Q13427	PPIG_HUMAN	IRSSVEKENQK.3	IRS[Ph]SVEKENQK	21902.3	15072.5	29936.1	24837.8	7889.56	13534.3	14846.2	28039		15532.6	17232.8
Q13427	PPIG_HUMAN	IRSSVEKENQK.3	IRSS[Ph]VEKENQK	19841.6	12070.2	21610.2	23863.3	7305.4	12325.8	15917	27286.4	17196.6	15259.1	17821.4
Q13427	PPIG_HUMAN	KADRDQSPFSK.2	KADRDQS[Ph]PFSK	10570.2	10740.9	5617.09	7481.48	8083.19		10494.3	19074.5		10758.5	12449.3
Q13427	PPIG_HUMAN	KADRDQSPFSK.3	KADRDQS[Ph]PFSK	1434.84	10805.1		2316.81	1747.84	1560.65	2350.23	2586.03	1128.6	2134.2	2849.01
Q13427	PPIG_HUMAN	KSPPKADEK.2	KS[Ph]PPKADEK	49157.8	36682	71518.5	43277.1	136943	33225.2	40434.9	68803.5	16544.8	59170.8	95758.9	13850.4
Q13427	PPIG_HUMAN	NVSESPNR.2	NVS[Ph]ES[Ph]PNR	2049.16	1825.31		1160.25	789.047		558.755	3826.91	1085.14
Q13427	PPIG_HUMAN	NVSESPNRK.2	NVS[Ph]ES[Ph]PNRK	15274.9	19469.6	12935	16086.1	23761.3	10783.1	17265.9	19537.5	15434.6	23524.7	26609.3	9973.49
Q13427	PPIG_HUMAN	NVSESPNRK.2	NVSES[Ph]PNRK	3500.25	7384	6541.64	7244.76	27951.6		6266.9	10518.2	5639.28	8815.23	30130.1	3841.38
Q13427	PPIG_HUMAN	RSETPPHWR.2	RS[Ph]ET[Ph]PPHWR	26817.8	31317.6	20418	31532.7	50525.2	25987.8	23638.2	33159.9	17464.8	33008.4	52885.2	35093.3
Q13427	PPIG_HUMAN	RSETPPHWR.3	RS[Ph]ET[Ph]PPHWR	10447	2663.45	10964.1	13840.1	12859.1	19126.2	12420.3	17343.1	11544.3	10947.6	7805.42	22696.3
Q13427	PPIG_HUMAN	RSETPPHWR.3	RSET[Ph]PPHWR	1107.71		2488.64	3356.53	5445.01		3019.14	3507.94	2615.95	1963.58	3263.76
Q13427	PPIG_HUMAN	SELNEIKENQRSPVR.3	SELNEIKENQRS[Ph]PVR	66018.1	67211.5	35834	57529.7	84329.4	39282.9	72862.5	81212.2	52519.4	60545.2	115867	34305.5
Q13427	PPIG_HUMAN	SETPPHWR.2	S[Ph]ET[Ph]PPHWR	40720.6	45440	56302.6	34851.8	83510.9	84413.6	41145.3	63349.6	37103.8	37519.2	53403.1	77881.2
Q13427	PPIG_HUMAN	SPPKADEK.2	S[Ph]PPKADEK	6018.42	4610.34	5850.79	7240.4	10156			10314.4	6834.24		12021.1	6778.9
Q13427	PPIG_HUMAN	SRECDITK.2	S[Ph]REC[cam]DITK	10894.7	20047.4	9055.82	15466.1	11744.7	12139.5	10017.1	13406.7	9331.27	11033	14804.5	8048.49
Q13428	TCOF_HUMAN	AALAPAKESPR.2	AALAPAKES[Ph]PR	132153	79239.7	361346	252682	117360	77510.6	111622	111716	458626	174248	118810	58306.3
Q13428	TCOF_HUMAN	AALAPAKESPRK.2	AALAPAKES[Ph]PRK	3604.58	2220.6	11705.4	10177.9			3559.18	2869.14	17332.7	6226.23	3521.81
Q13428	TCOF_HUMAN	AALAPAKESPRK.3	AALAPAKES[Ph]PRK	5260.97	7584.22	20717.7	16178.7	4920.96	3133.76	5217.6	5702.55	16494.9	10094.3	6317.57
Q13428	TCOF_HUMAN	AASAPAKESPR.2	AASAPAKES[Ph]PR	44983.9	24631.2	73745.2	108474	42934.9	14937.3	45020.7	37755.6	70200.4	67147.4	64401.7	9773.88
Q13428	TCOF_HUMAN	AASAPAKESPRK.2	AASAPAKES[Ph]PRK	4682.67		10168.6	10172	4677.58		5672.32		12091	8674.04	7569.27
Q13428	TCOF_HUMAN	AASAPAKESPRK.3	AASAPAKES[Ph]PRK	3266.49			5439.55			3826.74	2161.58	4039.45	6386.13	5124.21
Q13428	TCOF_HUMAN	ASSVSTKESPARK.3	ASSVSTKES[Ph]PARK	2962.29	1933.31	7041.05	7794					7545.4	3844.34	3687.56
Q13428	TCOF_HUMAN	KGAAPTPPGK.2	KGAAPT[Ph]PPGK	11979.5	14909.4	33639.1	32703.4	15101.5	14996	17103.9	14814.3	50856.2	26092.9	16075
Q13428	TCOF_HUMAN	KLGAGEGGEASVSPEK.2	KLGAGEGGEASVS[Ph]PEK	27811.5	61426.2	55361.2	53765.6	70466.9	34669.1	34475.3	26320.8	46148.4	71844	52547.7	29230.3
Q13428	TCOF_HUMAN	KLGAGEGGEASVSPEK.3	KLGAGEGGEASVS[Ph]PEK	9741.39	9417.65	24561.6	14795.6	20447.5	11215.1	13329.5	9905.67	23277.5	13401.6	10302
Q13428	TCOF_HUMAN	KLSGDQPAAR.2	KLS[Ph]GDQPAAR	328036	306665	409172	727555	374407	298153	383802	401225	310532	747065	578457	261398
Q13428	TCOF_HUMAN	KSAEPSANTTLVSETEEEGSVPAFGAAAK.3	KSAEPSANTTLVS[Ph]ETEEEGSVPAFGAAAK	45455.6	45370.7	114329	103801	63552.3	46922	49085.4	42068.7	125718	74715.6	50417.9	55460.3
Q13428	TCOF_HUMAN	LDSSPSVSSTLAAK.2	LDSS[Ph]PSVSSTLAAK	162068	93577	256566	221754	171576	83280.5	181796	114531	308278	248834	165827	78696.9
Q13428	TCOF_HUMAN	LGAGEGGEASVSPEK.2	LGAGEGGEASVS[Ph]PEK	202517	248224	277150	247035	351548	146355	174556	155851	355927	253746	377135	135884
Q13428	TCOF_HUMAN	PTSSPAKGPPQK.2	PTS[Ph]SPAKGPPQK	8604.77	11964	17064.5	18089.2	5649.03	6080.19	8295.18	5863.5	18771.4	9738.36	8647.73
Q13428	TCOF_HUMAN	PTSSPAKGPPQK.2	PTSS[Ph]PAKGPPQK	8030.01	11202.7	15825.1	17793.9		6026.57	8315.34		17722.8		9027.78
Q13428	TCOF_HUMAN	PTSSPAKGPPQK.3	PTSS[Ph]PAKGPPQK			2239.41	19541.8					2232.67	10046.4
Q13428	TCOF_HUMAN	SLGNILQAKPTSSPAK.2	SLGNILQAKPT[Ph]SSPAK	84873.4	105498	182087	145237	56625.6	53046.4	83296	71628.7	168574	165285	79356.6	91930.7
Q13428	TCOF_HUMAN	SLGNILQAKPTSSPAK.2	SLGNILQAKPTSS[Ph]PAK	63616.3	88062.2	126777	100449	40078.7	61179.7	62932.9	55843.1	115324	119461	58701.9	94328.2
Q13428	TCOF_HUMAN	SLGNILQAKPTSSPAK.3	SLGNILQAKPT[Ph]SSPAK	29631.9	38259.4	64077.6	48924.5	29378.9	23364.1	28527.1	26992.4	64410.4	53416.1	32410.3
Q13428	TCOF_HUMAN	SLGNILQAKPTSSPAKGPPQK.3	SLGNILQAKPT[Ph]SSPAKGPPQK	53673.3	60098.6	71319.4	58785	28724.5	26829.5	59519.7	58634.6	117383	123933	36349.2
Q13428	TCOF_HUMAN	SLGNILQAKPTSSPAKGPPQK.3	SLGNILQAKPTSS[Ph]PAKGPPQK	36041.1	41248.5	47406.7	38839.3	19368.2	19412.1	41350.8	40297.7	78017.6	81739.6	24637.6
Q13428	TCOF_HUMAN	SLGNILQAKPTSSPAKGPPQK.4	SLGNILQAKPT[Ph]SSPAKGPPQK	4617.43	5546.07	3573.23	4043.13	426.089	1427.97	6060.66	6155.85	7489.43	8148.17	2587.8	804.933
Q13428	TCOF_HUMAN	SPAGPAATPAQAQAASTPR.2	SPAGPAATPAQAQAAS[Ph]TPR	4474.99	3354.12	6891.39	5301.73		2529.2	3107.19		6320.32	7753.05	5514.94
Q13428	TCOF_HUMAN	SPAGPAATPAQAQAASTPR.2	SPAGPAATPAQAQAAST[Ph]PR	6748.36	5277.14	10117.4	7566.24			4487.87	3793.82	10071.3	10256.9	6696.06
Q13428	TCOF_HUMAN	SPQVKPASTMGMGPLGK.3	S[Ph]PQVKPASTMGMGPLGK	10327.5	7209.31	21600.1	18973.5	2677		9714.43	7217.9	21521.2	22009.6	8199.85
Q13428	TCOF_HUMAN	TSQVGAASAPAKESPR.2	TSQVGAASAPAKES[Ph]PR	158935	171512	268439	296071	98272.3	72751.9	159915	164973	311213	324833	199199	79880
Q13428	TCOF_HUMAN	TSQVGAASAPAKESPR.3	TSQVGAASAPAKES[Ph]PR	40890.2	26612.4	93036.6	82143.3	33085.6	25310.9	44215.9	37104	88457.1	58181.5	32749	19061.9
Q13428	TCOF_HUMAN	TSQVGAASAPAKESPRK.2	TSQVGAASAPAKES[Ph]PRK	5060.23	4089.08	8231.81	11676.7	5584.88		4117.48	2892.46	13274.4	7634.7	6293.72
Q13428	TCOF_HUMAN	TSQVGAASAPAKESPRK.3	TSQVGAASAPAKES[Ph]PRK	19679.9	15308.3	36490.2	35996.8	29685.9	9258.3	17329.2	16570.6	45982.2	30840.7	26977.4	7254.27
Q13428	TCOF_HUMAN	TVANLLSGKSPR.2	TVANLLSGKS[Ph]PR	182137	134149	411715	492247	164069	101226	194521	155483	388850	450086	206037	82035.9
Q13428	TCOF_HUMAN	TVANLLSGKSPR.3	TVANLLSGKS[Ph]PR	23443.8	20046.9	55054.9	67537	18807.7	12586.9	26272.6	24385.7	50851.6	56841.3	25828.6	10511.8
Q13428	TCOF_HUMAN	VGDVTPQVK.2	VGDVT[Ph]PQVK			2378.39	1306.57	12001.4				4782.14	2143.15
Q13435	SF3B2_HUMAN	SSLGQSASETEEDTVSVSK.2	SSLGQS[Ph]AS[Ph]ETEEDTVSVSK	104725	31244.6	31674.4	28906.3	57762.8	26140.2	121626	10026.6	26291.2	49581.8	61535	37890.5
Q13435	SF3B2_HUMAN	SSLGQSASETEEDTVSVSK.2	SSLGQSAS[Ph]ETEEDTVSVSK	41087.5	37873.3	38243.2	22339.4	54540	32073.5	38319.1	13630.9	23149.4	27748.2	75401.8	27705.3
Q13435	SF3B2_HUMAN	SSLGQSASETEEDTVSVSK.2	SSLGQSASET[Ph]EEDTVSVSK	36797.9	30159	26348.4	11091.6	36953.9	7203.95	35217.6	13468.3	21815.8	24251.7	69511.5	21420.9
Q13439	GOGA4_HUMAN	SSSKESLVR.2	SSS[Ph]KESLVR	9054.45	8248.35	10864.9	11591.6	9138.49	8542.43	8095.62	7144.66	9693.57	9532.52	9387.21	7498.45
Q13439	GOGA4_HUMAN	TSSFTEQLDEGTPNR.2	TSS[Ph]FTEQLDEGTPNR	38805.2	48835.9	37774.4	50229.4	63360.9	40972.5	39491	36193.7	37090.7	37424.9	37489	20546.9
Q13442	HAP28_HUMAN	KSLDSDESEDEEDDYQQK.3	KSLDS[Ph]DES[Ph]EDEEDDYQQK	27220.7	35679.4	35035.1	16862.9	55845.9	44219.6	21151.9	19276.7	26529.1	28506.5	25839.3	54783.4
Q13442	HAP28_HUMAN	SLDSDESEDEEDDYQQKR.2	SLDS[Ph]DES[Ph]EDEEDDYQQKR	16148	26929.3	16478.4	12923.2	16580.5	24760.1	18867.3	15290.2	14464.6	31332.1	17974.5	37273.1
Q13442	HAP28_HUMAN	SLDSDESEDEEDDYQQKR.3	SLDS[Ph]DES[Ph]EDEEDDYQQKR	7036.98	5935.24	6927.81	5273.89	6373.72	9593.3	6338.06	5045.37	6323.63	11412.2	6072.4	10677.2
Q13451	FKBP5_HUMAN	NNEESPTATVAEQGEDITSK.2	NNEES[Ph]PTATVAEQGEDITSK	15168.5	22363	9515.85	10416	29001.1	38589.7	15201.4	25391	8464.23	9647.79	16944.5	58756.2
Q13459	MYO9B_HUMAN	KKPGDASSLPDAGLSPGSQVDSK.3	KKPGDASSLPDAGLS[Ph]PGSQVDSK	9422.81	16030	12564.6	12878.9			13118.1	8422.69	14881.6	24501.5	7180.2
Q13459	MYO9B_HUMAN	RTSFSTSDVSK.2	RT[Ph]SFSTSDVSK	37688.7	15170.2	31549.9	13875.3	24481.4	8963.76	32030.1	12039.9	35577.8	6452.53	23703.5
Q13459	MYO9B_HUMAN	RTSFSTSDVSK.2	RTS[Ph]FSTSDVSK	33528.7	13663.4	27046.5	12160.4	18230.7	8235.76	27425.2	11095.4	30365.2	6286.05	21125.8	7904.91
Q13459	MYO9B_HUMAN	SPLEHSSPEK.2	SPLEHSS[Ph]PEK	5203.12		4250.01	3293.43	5286.62		3958	4331.96	6130.66	2515.74	4896.16
Q13459	MYO9B_HUMAN	SPLEHSSPEKEAPSPEK.2	SPLEHSS[Ph]PEKEAPS[Ph]PEK	18111.5	21633.6	26988.7	16861.9	11182.6		21110.6	15602.9	21164.7	29562.7
Q13459	MYO9B_HUMAN	SPLEHSSPEKEAPSPEK.3	SPLEHS[Ph]SPEKEAPS[Ph]PEK	14120.6	9946.59	18963.3	11404	7505.62	8589.73	13033.4	11933.1	13012.4	20702.9	9696.06	11488.1
Q13459	MYO9B_HUMAN	VQEKPDSPGGSTQIQR.2	VQEKPDS[Ph]PGGSTQIQR	7177.97	9852.17	6673.77	12841.9	2456.38		8799.85	10806.4	11188.6	13295	9411.85
Q13459	MYO9B_HUMAN	VQEKPDSPGGSTQIQR.3	VQEKPDS[Ph]PGGSTQIQR		4014.79	6136.14	5417.99	1420.43		2951.72	5278.07	8602.93	4442.34	2869.28
Q13459	MYO9B_HUMAN	VSPPAPGSAPETPEDK.2	VSPPAPGS[Ph]APET[Ph]PEDK	19905.7	30376	23732	21940.6	9291.74	24409.7	20242	11462.3	37808	54802.6	6469.48	25387.2
Q13469	NFAC2_HUMAN	TSPDPSPVSAAPSK.2	T[Ph]SPDPSPVSAAPSK	3651.89	49453.3	13906	11134.6	5373.65	5784.89	2063.84	24692.7	6844.46	5952.28	3819.79	2277.32
Q13469	NFAC2_HUMAN	TSPIMSPR.2	TS[Ph]PIMS[Ph]PR	2840.78	16075.5	15234.4	10445.8	3926.12	23825.9	4793.83	41423.9	14522.9	5734.39	7068.76	21795.6
Q13480	GAB1_HUMAN	SYSHDVLPK.2	SYS[Ph]HDVLPK		8687		4241.05	25037.3	67564		17141.4		3510.35	23705.8	50853.3
Q13501	SQSTM_HUMAN	LTPVSPESSSTEEK.2	LTPVS[Ph]PESSSTEEK	7205.81	56849.6	31021.7	51994.6	25307.2	7259.01	7020.83	47154.1	49500.4	45042.3	18823.3	5433.68
Q13501	SQSTM_HUMAN	SRLTPVSPESSSTEEK.2	SRLT[Ph]PVS[Ph]PESSSTEEK	4253.43	18760.2	17469.1	13484.2			3539.53	12855.7	19502	28083.5
Q13523	PRP4B_HUMAN	AKSRSLER.2	AKS[Ph]RS[Ph]LER	2886.7	7495.94	3554.42	3399.18	5855.2	5414.69	3649.45	5863.19	2633.07	4647.3	4978.56	6417.08
Q13523	PRP4B_HUMAN	ARSPTDDK.2	ARS[Ph]PTDDK			1.50286			588.395		2.40173	3.18764
Q13523	PRP4B_HUMAN	ARSPTDDKVK.2	ARS[Ph]PTDDKVK	11693	13631.1	4676.22	28732.6	17097.1		9402.65	12161.9	6363.14	3219.98	31924.6	5104.21
Q13523	PRP4B_HUMAN	DASPINR.2	DAS[Ph]PINR	2191.56	3563.11	2067.73	2174.4	3752.3	2291.41	2126.34	4396.76			1385.37	1964.24
Q13523	PRP4B_HUMAN	DASPINRWSPTR.2	DAS[Ph]PINRWS[Ph]PTR	37571	52111.8	24864.4	26279.2	28678.8	39182	35633.8	48492.2	23485.6	35325.5	37090.4	45456.1
Q13523	PRP4B_HUMAN	EIIDASDKEGMSPAK.2	EIIDAS[Ph]DKEGMS[Ph]PAK		39295.6		17145.9		25399.5		32311.7		17402.1		27471.6
Q13523	PRP4B_HUMAN	EIIDASDKEGMSPAK.3	EIIDAS[Ph]DKEGMS[Ph]PAK		8406.52		4521.55		12111.9		11394.7		2757.36		12641.8
Q13523	PRP4B_HUMAN	EIIDASDKEGMSPAKR.2	EIIDAS[Ph]DKEGMS[Ph]PAKR	4434.65	31008.1	2532.06	11032.5		20166.1		21487.1		12785.3		25295.6
Q13523	PRP4B_HUMAN	EIIDASDKEGMSPAKR.3	EIIDAS[Ph]DKEGM[ox]S[Ph]PAKR		8803.23		4280.23		7592.7		9120.68		4659.12		14468.1
Q13523	PRP4B_HUMAN	EIIDASDKEGMSPAKR.3	EIIDAS[Ph]DKEGMS[Ph]PAKR		214642		72053.6		178225		183121		82780.5		226332
Q13523	PRP4B_HUMAN	EIIDASDKEGMSPAKR.3	EIIDASDKEGMS[Ph]PAKR		16641.3	11543.2	24899		7156.09		20868.3		22694.6		6537.43
Q13523	PRP4B_HUMAN	KKSPIINESR.2	KKS[Ph]PIINESR	114102	199691	111041	128010	207917	127561	120840	200296	132447	132305	270753	93623.6
Q13523	PRP4B_HUMAN	KKSPIINESR.3	KKS[Ph]PIINESR	27586.4	20209.7	48198.7	52202.5	29279.9	67329	41943.1	54354.1	56985.4	27869.7	36041.4	43110.2
Q13523	PRP4B_HUMAN	KPIKSPSK.2	KPIKS[Ph]PSK	18162.5	26571.2	14694.9	23750.7	56516.5	21715.3	16290.3	28210.7	18502.2	20172.2	42473.1	10305
Q13523	PRP4B_HUMAN	KSKSPTLR.2	KS[Ph]KS[Ph]PTLR	27721.1	42129.3	17155.7	24986.3	22902.2	26108.5	21435.2	37483.3	19547.4	26223	33079.7	25042.8
Q13523	PRP4B_HUMAN	KSRSPVDLR.2	KS[Ph]RS[Ph]PVDLR	1907.43	1075.45	1626.6	3334.82	3259.68	4116.06	2616.79	2619.75	1278.4	3539.76	2896.35	7476.27
Q13523	PRP4B_HUMAN	LCDFGSASHVADNDITPYLVSR.3	LC[cam]DFGSASHVADNDITPY[Ph]LVSR	309010	427505	197061	143017	446311	208586	291923	436996	188943	218640	237212	198883
Q13523	PRP4B_HUMAN	RPGRSPK.2	RPGRS[Ph]PK				3229.79							4238.92	3682.47
Q13523	PRP4B_HUMAN	SKDASPINR.2	S[Ph]KDAS[Ph]PINR	26619.5	56647.2	27279.6	25180.1	39085.7	62664.1	24161.9	39989.8	23757.3	25313.5	36740.6	63674.8
Q13523	PRP4B_HUMAN	SKDASPINR.2	SKDAS[Ph]PINR	8319.1	11572.2	3873.96	10838.5	18745.5	5633.48	5253.12	10896.3	7273.56	5120.37	16459.4
Q13523	PRP4B_HUMAN	SKDASPINRWSPTR.3	S[Ph]KDAS[Ph]PINRWS[Ph]PTR	44290.5	41882.3	44625.2	29547.8	30093.5	76978.4	52745.4	73198.9	33591.3	49963.4	30135.4	100759
Q13523	PRP4B_HUMAN	SLSPKPR.2	S[Ph]LS[Ph]PKPR	141902	267025	164787	150734	165445	329284	167220	337376	134716	152602	201264	262054
Q13523	PRP4B_HUMAN	SRSPLLNDR.2	S[Ph]RS[Ph]PLLNDR	143138	446063	162404	133789	292181	294936	159904	332089	129338	180203	299871	416232
Q13523	PRP4B_HUMAN	SRSPLLNDR.3	S[Ph]RS[Ph]PLLNDR	1571.02	5785.41	2948.57	4019.63	4971.07	8385.78	4111.96	11731.8	3785.01	3021.69	3008.18	16972.5
Q13523	PRP4B_HUMAN	SRSPLLNDRR.2	S[Ph]RS[Ph]PLLNDRR	6507.45	14291.9	4003.99	7499.13	5979.4	6216.87	9645.88	14560.2	4027.13	12029.8	12851.3	10466.5
Q13523	PRP4B_HUMAN	SRSPLLNDRR.3	S[Ph]RS[Ph]PLLNDRR	17907.1	27023.4	17032.4	24192.4	16314.9	39186.6	47294.4	52888.7	11668.4	33148.2	21568	55748.9
Q13523	PRP4B_HUMAN	SRSPVDLR.2	S[Ph]RS[Ph]PVDLR	242020	421735	351542	208038	353351	609299	244348	469643	257144	293499	297404	644149
Q13523	PRP4B_HUMAN	SRSPVDLR.2	SRS[Ph]PVDLR	3039.31	3243.76	6030.15	7002.6	3921.04	3056.19	4052.81	5112.39	6593.36	7031.61	4526.79
Q13523	PRP4B_HUMAN	TLSPGRR.2	TLS[Ph]PGRR	5062.98	3953.18	1364.64	6813.04	12429.2	3948.78	6228.77	10544.9	5067.98	4300.05	18550.1	2042.05
Q13523	PRP4B_HUMAN	TRSPSPDDILER.2	TRS[Ph]PS[Ph]PDDILER	37650.6	49051.4	44440.7	64071.5	53397.2	41031.2	20152.7	30741.1	22808.9	65072.7	44592	33170.9
Q13535	ATR_HUMAN	LEMTQNSYRAK.2	LEM[ox]T[Ph]QNS[Ph]Y[Ph]RAK	2843.6	4706.87	3186.21	4347.1	9560.58	4075.06	1559.01	3212.67	2207.36	3999.67	5094.57	3678.7
Q13541	4EBP1_HUMAN	DLPTIPGVTSPSSDEPPMEASQSHLRNSPEDKR.4	DLPTIPGVTSPSSDEPPMEASQSHLRNS[Ph]PEDKR	39934.5		66609.5	44690	24967.9		62395.2	18193.8	80338.9	76027.7	28571
Q13541	4EBP1_HUMAN	NSPVTKTPPR.2	NS[Ph]PVTKT[Ph]PPR	126313	67023	160394	165526	42636.9	117476	58276.5	21220.5	14923.9	5186.38	23332.5	9175.22
Q13541	4EBP1_HUMAN	TPPRDLPTIPGVTSPSSDEPPMEASQSHLR.4	T[Ph]PPRDLPTIPGVTSPSSDEPPMEASQSHLR	109835	41493.1	113417	60236	37879.8	43594.4	55320.4	22955.7		7088.09	14028.3
Q13542	4EBP2_HUMAN	TVAISDAAQLPHDYCTTPGGTLFSTTPGGTR.3	TVAISDAAQLPHDYC[cam]TTPGGTLFST[Ph]T[Ph]PGGTR	178947	159695	159075	175886	99393.8	110063	195082	153660	51878.4	67375.7	132189	70564
[truncated: 4,250 more rows]
