# Supplementary material for: PQR309 Is a Novel Dual PI3K/mTOR Inhibitor with Preclinical Antitumor Activity in Lymphomas as a Single Agent and in Combination Therapy
Source: Oxford University Press journal article supplement (doi:10.1158/1078-0432.ccr-17-1041), 2017-10-24
Supplement: 10780432ccr171041-sup-181771_2_supp_4322365_txm7fc.xlsx [file 10780432ccr171041-sup-181771_2_supp_4322365_txm7fc.xlsx]

## Sheet: Sheet1
Phosphoresidue	log ratio	P	AveExpr.DMSO	AveExpr.PQR309	OCILY1_DMSO	OCILY1_PQR309	SP53_DMSO	SP53_PQR309	SUDHL10_DMSO	SUDHL10_PQR309	SUDHL2_DMSO	SUDHL2_PQR309	TMD8_DMSO	TMD8_PQR309	Z138_DMSO	Z138_PQR309
Non-p-4E-BP1(Thr46)=>EIF4EBP1	0.709854	1.21e-09	-1.04214	-0.332285	-1.44919	-0.827976	-1.03262	-0.458817	-0.364363	0.527737	-1.14967	-0.13502	-1.01014	-0.356742	-1.24684	-0.74289
Non-p-Src(Tyr416)=>SRC	-0.0842494	0.466074	-0.824032	-0.908281	-1.33159	-1.27046	-1.06216	-1.34865	-0.704106	-0.931378	0.0625212	0.0898738	-0.876422	-0.561772	-1.03243	-1.4273
Non-p-Src(Tyr527)=>SRC	0.0797385	0.490278	-1.87138	-1.79164	-2.31489	-2.1386	-1.96299	-1.83239	-2.81108	-2.85799	-1.34312	-1.397	-1.40588	-0.946853	-1.39034	-1.57704
p-4E-BP1(Ser65)=>EIF4EBP1	-0.148596	0.198732	-1.3022	-1.4508	-1.64066	-1.71942	-1.64327	-1.71882	-0.879893	-1.28376	-0.941557	-1.30637	-1.47581	-1.05687	-1.23203	-1.61956
p-4E-BP1(Thr37.46)=>EIF4EBP1	-0.576583	5.95e-06	-1.34033	-1.86481	-1.39348	-1.60079	-1.49713	-2.15472	-1.09357	-3.04265	-1.19855	-1.55511	-1.2584	-0.970772	-1.60084	nd
p-4E-BP1(Thr70)=>EIF4EBP1	-0.276414	0.0169429	-0.864054	-1.14047	-0.776126	-0.769585	-0.925542	-1.17951	-0.670697	-1.47504	-0.672562	-0.878349	-1.00775	-0.878394	-1.13165	-1.66193
p-A-Raf(Ser299)=>ARAF	-0.052164	0.651747	-1.52589	-1.57806	-1.61454	-1.59996	-1.87064	-1.86304	-2.22117	-2.38963	-1.23904	-1.29072	-0.975701	-0.506192	-1.23426	-1.81879
p-Acetyl-CoAcarboxylase(Ser79)=>ACACA	-0.0748379	0.517322	-1.75158	-1.82642	-1.65251	-1.89089	-2.09003	-2.01505	-2.09682	-2.12217	-1.34499	-1.52448	-1.34918	-1.04443	-1.97597	-2.36151
p-Akt(Ser473)=>AKT1|AKT2	-0.0892463	0.440056	-1.99752	-2.08676	-2.46687	-2.53266	-1.7719	-1.99521	-2.80063	-3.07921	-1.55227	-1.51353	-1.42208	-1.10239	-1.97134	-2.29757
p-Akt(Thr308)=>AKT1|AKT2	-0.0822357	0.476796	-1.89213	-1.97437	-2.48077	-2.23528	-1.76226	-2.0676	-2.69009	-3.04818	-1.29109	-1.44447	-1.40035	-0.977364	-1.72825	-2.07333
p-ALK(Tyr1282.1283)=>ALK	0.042698	0.711799	-1.90919	-1.86649	-2.51854	-2.20842	-1.91806	-1.81245	-2.96961	-3.10071	-1.29309	-1.27825	-1.14103	-0.784508	-1.61481	-2.01462
p-AMPKa(Thr172)=>PRKAA1|PRKAA2	-0.159101	0.168842	-1.66001	-1.81911	-2.20242	-2.00415	-1.76299	-2.0372	-2.27501	-2.47341	-1.02361	-1.22204	-1.12372	-0.844226	-1.57229	-2.33363
p-AMPKb1(Ser108)=>PRKAB1	-0.00291075	0.979907	-1.76938	-1.77229	-2.21593	-2.28863	-1.99433	-1.79216	-2.04398	-2.22006	-1.27961	-1.1959	-1.14387	-0.804809	-1.93857	-2.33219
p-AP2M1(Thr156)=>AP2M1	0.0121316	0.916398	-1.69672	-1.68459	-2.27715	-2.1639	-1.66801	-1.86749	-2.19397	-2.29098	-1.18737	-1.17909	-0.961397	-0.669348	-1.89243	-1.93674
p-ATF-2(Thr71)=>ATF2	0.00782034	0.94605	-1.5507	-1.54288	-2.1231	-1.99082	-1.54738	-1.34115	-2.514	-2.5823	-0.764547	-0.983371	-0.864666	-0.572168	-1.49051	-1.78747
p-ATM(Ser1981)=>ATM	0.0370494	0.748536	-0.646133	-0.609084	-1.29813	-1.24192	-1.11201	-0.964748	-0.482366	-0.552065	0.374788	0.352613	-0.509546	-0.156283	-0.849541	-1.0921
p-ATR(Ser428)=>ATR	0.0813079	0.481781	-1.5106	-1.4293	-2.06032	-1.92106	-1.64286	-1.60322	-2.11118	-2.13316	-0.84695	-0.998831	-0.923334	-0.307392	-1.47898	-1.61211
p-AuroraA(Thr288)_AuroraB(Thr232)_AuroraC(Thr198)=>AURKA	-0.094158	0.415315	-1.53148	-1.62564	-2.33376	-2.20133	-1.79105	-1.79935	-2.5155	-2.75714	-1.1029	-1.38048	-1.14678	-0.636191	-1.72664	-1.85501
p-AuroraA(Thr288)=>AURKA	-0.00214651	0.985182	-1.76944	-1.77159	-1.95763	-2.01717	-1.84983	-1.75809	-2.30528	-2.46691	-0.895086	-1.03937	-0.680721	-0.383301	-1.50034	-2.08901
p-b-catenin(Ser33.37.Thr41)=>CTNNB1	-0.0223644	0.846558	-1.58054	-1.60291	-1.90482	-1.94865	-1.61668	-1.62891	-2.38274	-2.46105	-0.912012	-1.04538	-1.14432	-0.731618	-1.52268	-1.80183
p-b-catenin(Ser45)=>CTNNB1	-0.0341884	0.76737	-1.45458	-1.48877	-2.01238	-1.90706	-1.45583	-1.48079	-2.49714	-2.6401	-0.750547	-0.828353	-0.671096	-0.440429	-1.34047	-1.63587
p-B-Raf(Ser445)=>BRAF	-0.175587	0.128929	-1.49822	-1.6738	-2.05826	-2.03302	-1.60047	-1.67145	-2.04004	-2.34742	-0.881836	-1.18671	-0.903103	-0.571483	-1.5056	-2.23275
p-Bad(Ser112)=>BAD	-0.00768795	0.946962	-1.19887	-1.20656	-2.0565	-2.03235	-1.44796	-1.41639	-1.2239	-1.24706	0.0136999	0.0619131	-1.05556	-0.836071	-1.42299	-1.76939
p-Bad(Ser136)=>BAD	0.0434658	0.706854	-2.01261	-1.96914	-2.23454	-2.2195	-2.1373	-2.15188	-2.82917	-2.79428	-1.43987	-1.59319	-1.38526	-1.01442	-2.04951	-2.04158
p-Bad(Ser155)=>BAD	0.0430898	0.709274	-1.89846	-1.85537	-2.28375	-2.34828	-1.94613	-1.74778	-2.58836	-2.51576	-1.40105	-1.30519	-1.29254	-1.09857	-1.87896	-2.11666
p-BAP1(Ser592)=>BAP1	-0.0105195	0.927475	-1.83347	-1.84399	-2.35478	-2.26543	-1.73561	-1.88345	-2.50242	-2.59318	-1.22401	-1.34787	-1.38135	-0.93289	-1.80266	-2.04112
p-Bcl-2(Ser70)=>BCL2	-0.049568	0.668012	-1.1353	-1.18487	-0.206343	-0.172941	-1.22976	-1.3461	-2.38245	-2.662	-0.932355	-1.13128	-0.854053	-0.24592	-1.20687	-1.55099
p-Bcl-2(Thr56)=>BCL2	-0.0208551	0.856797	-1.63806	-1.65892	-2.25734	-2.20621	-1.62917	-1.75903	-2.36024	-2.57634	-0.977332	-1.25732	-1.04891	-0.435124	-1.55536	-1.71947
p-Bim(Ser69)=>BCL2L11	-0.00155766	0.989246	-1.96956	-1.97112	-2.34527	-2.32761	-2.05077	-2.11898	-2.40565	-2.72107	-1.54941	-1.54762	-1.42737	-1.05349	-2.03888	-2.05792
p-BRCA1(Ser1524)=>BRCA1	0.0147763	0.898264	-1.52967	-1.51489	-2.04811	-1.87492	-1.6791	-1.53545	-1.42403	-1.68662	-1.15529	-1.17957	-1.48674	-1.09492	-1.38476	-1.7179
p-c-Fos(Ser32)=>FOS	-0.00245666	0.983041	-2.01216	-2.01462	-2.68554	-2.62382	-2.04677	-1.98067	-3.01742	-3.18644	-1.30277	-1.22195	-1.11446	-0.789793	-1.90602	-2.28504
p-c-Jun(Ser63)=>JUN	-0.0612246	0.596306	-1.56924	-1.63046	-2.20263	-2.19512	-1.71038	-1.62739	-2.21298	-2.45368	-0.892978	-0.955723	-0.799285	-0.620966	-1.59716	-1.92988
p-c-Jun(Ser73)=>JUN	-0.019793	0.864017	-1.75133	-1.77112	-2.49429	-2.33212	-1.80212	-1.76246	-2.67315	-2.82689	-0.969773	-0.968938	-0.881025	-0.693611	-1.6876	-2.0427
p-c-Kit(Tyr703)=>KIT	0.103288	0.371573	-1.63946	-1.53617	-2.17693	-2.10645	-1.69472	-1.41791	-2.35948	-2.42791	-1.12071	-1.15868	-1.03501	-0.712131	-1.44991	-1.39395
p-c-Raf(Ser259)=>RAF1	0.105589	0.361019	-1.4553	-1.34971	-1.80442	-1.61809	-1.75385	-1.62401	-1.82025	-1.80174	-0.775205	-0.971969	-1.17025	-0.743252	-1.40782	-1.3392
p-c-Raf(Ser289.296.301)=>RAF1	-0.120623	0.296761	-1.38887	-1.5095	-1.59094	-1.62698	-1.40573	-1.59994	-2.18293	-2.39131	-0.716088	-0.889273	-0.954259	-0.407898	-1.48329	-2.14158
p-c-Raf(Ser338)=>RAF1	0.0198747	0.863461	-1.52148	-1.5016	-2.01536	-1.94593	-1.63797	-1.46119	-2.0198	-2.2055	-1.03051	-1.20853	-1.03266	-0.511752	-1.39255	-1.67671
p-Chk1(Ser296)=>CHK1	0.219384	0.0579105	-1.32104	-1.10165	-1.8231	-1.63578	-1.28814	-0.97372	-2.0647	-2.04274	-0.818832	-0.80399	-0.751386	-0.250555	-1.18007	-0.903139
p-Chk1(Ser317)=>CHK1	0.0752359	0.515097	-1.50738	-1.43214	-1.89447	-1.75257	-1.54586	-1.48539	-2.10126	-2.38172	-1.01762	-0.962468	-1.02261	-0.45074	-1.46244	-1.55997
p-Chk1(Ser345)=>CHK1	0.108917	0.346092	-1.38079	-1.27188	-1.44581	-1.30293	-1.52462	-1.34809	-1.86928	-1.86432	-0.893242	-0.817547	-0.92882	-0.447716	-1.62298	-1.85065
p-Chk2(Ser19)=>CHK2	-0.00383727	0.973513	-1.45597	-1.4598	-1.94917	-1.99506	-1.50444	-1.52655	-1.92636	-2.04812	-0.973771	-0.975884	-0.928755	-0.446557	-1.4533	-1.76665
p-Chk2(Ser33.35)=>CHK2	0.0234078	0.839495	-1.65797	-1.63456	-2.38253	-2.24231	-1.80458	-1.79865	-2.38959	-2.62209	-0.910697	-1.08045	-0.772479	-0.450717	-1.68795	-1.61316
p-Chk2(Thr68)=>CHK2	0.097924	0.396915	-1.80026	-1.70233	-2.36567	-2.37672	-1.8313	-1.64923	-2.4888	-2.55613	-1.14907	-1.14149	-1.06409	-0.624227	-1.90263	-1.86621
p-Cofilin(Ser3)=>CFL1	0.178044	0.123669	-0.849014	-0.67097	-1.79377	-1.44547	-0.864022	-0.762121	-1.2878	-0.93037	0.727818	0.626786	-1.34079	-1.17117	-0.535516	-0.343475
p-CREB(Ser133)=>CREB1	-0.147408	0.202341	-0.93277	-1.08018	-1.45483	-1.5211	-0.339724	-0.510649	-0.777057	-1.02999	-1.13805	-1.37808	-1.47206	-1.1762	-0.414908	-0.865049
p-CyclinD1(Thr286)=>CCND1	0.0905336	0.433491	-1.65018	-1.55964	-2.13101	-1.91024	-1.71053	-1.65468	-2.10181	-2.05288	-1.26739	-1.32531	-1.23972	-1.00392	-1.45059	-1.41083
p-eEF2k(Ser366)=>EEF2K	-0.168016	0.146239	-0.983666	-1.15168	-0.67248	-0.796	-1.2937	-1.45337	-1.23282	-1.60055	-0.632258	-0.753693	-0.650927	-0.661624	-1.41981	-1.64485
p-EGFReceptor(Tyr1045)=>HER1	0.0191951	0.868087	-1.69725	-1.67805	-2.61517	-2.21799	-1.72282	-1.77975	-2.21486	-2.47115	-1.11168	-1.30032	-1.03535	-0.55285	-1.48361	-1.74626
p-EGFReceptor(Tyr1068)=>HER1	0.247417	0.0325073	-2.34158	-2.09416	-2.96132	-2.62467	-2.07002	-1.64554	-3.47467	-3.37541	-1.36557	-1.22664	-1.88102	-2.08739	-2.29689	-1.60533
p-EGFReceptor(Tyr992)=>HER1	-0.0664882	0.56512	-1.81768	-1.88417	-2.51428	-2.36868	-1.94553	-1.9888	-2.3921	-2.87643	-1.0093	-1.26734	-1.25119	-0.6237	-1.79369	-2.18009
p-eIF4B(Ser422)=>EIF4B	0.0500139	0.665207	-1.57526	-1.52524	-1.94282	-1.87503	-1.56228	-1.43382	-2.23917	-2.45474	-1.14541	-1.25247	-1.06328	-0.648729	-1.49857	-1.48667
p-eIF4E(Ser209)=>EIF4E	-0.0129625	0.910695	-1.71556	-1.72852	-2.2191	-1.97895	-1.73319	-1.6205	-2.20587	-2.79951	-1.25896	-1.3013	-1.22988	-0.896939	-1.64637	-1.77394
p-eIF4G(Ser1108)=>EIF4G	-0.719421	7.31e-10	-0.360188	-1.07961	0.0348286	-0.246837	-0.837976	-1.37328	-0.585401	-1.18983	0.591951	-0.945295	-0.487461	-0.507672	-0.877071	-2.21474
p-eNOS(Ser1177)=>NOS3	-0.0848202	0.463059	-0.950306	-1.03513	-0.979908	-1.00363	-1.22342	-1.34996	-0.690499	-0.938302	-0.714353	-1.09219	-1.24508	-0.754686	-0.84857	-1.072
p-Ezrin(Thr567)_Radixin(Thr564)_Moesin(Thr558)=>EZR|RDX|MSN	0.0742283	0.520739	-2.12482	-2.05059	-2.63952	-2.51367	-2.22893	-2.28184	-2.77276	-2.88274	-1.45118	-1.47477	-1.4748	-1.02701	-2.18174	-2.12353
p-FLT3(Tyr591)=>FLT3	0.187089	0.105736	-1.6063	-1.41922	-2.08694	-1.79184	-1.67738	-1.26294	-2.54268	-2.44363	-1.16612	-1.03774	-0.808919	-0.635801	-1.35579	-1.34334
p-FoxO1(Ser256)=>FOXO1	-0.0844201	0.465171	-1.38931	-1.47373	-1.45291	-1.46033	-1.46971	-1.56275	-1.70596	-1.92247	-1.08997	-1.1941	-1.28953	-1.03862	-1.32778	-1.66412
p-FoxO1(Thr24)_FoxO3a(Thr32)_FoxO4(Thr28)=>FOXO1|FOXO3|FOXO4	-0.038827	0.736909	-1.8502	-1.88902	-2.41661	-2.0887	-1.48099	-1.81073	-2.02557	-2.38043	-1.20866	-1.16828	-0.909078	-0.78658	-1.57165	-1.86971
p-FoxO1(Thr24)_FoxO3a(Thr32)=>FOXO1|FOXO3	-0.0819768	0.478184	-1.60209	-1.68407	-2.50668	-2.46876	-1.83721	-1.92371	-2.45677	-2.86506	-1.23552	-1.30712	-1.23805	-0.718416	-1.82694	-2.05107
p-FoxO3a(Ser253)=>FOXO3A	0.0413711	0.720372	-1.24665	-1.20528	-1.12711	-1.13919	-1.33027	-1.54222	-1.68909	-1.31409	-0.985178	-0.680771	-0.746373	-1.05649	-1.60188	-1.4989
p-FoxO3a(Ser318.321)=>FOXO3A	-0.024698	0.830778	-1.78967	-1.81437	-2.34036	-2.27616	-1.85102	-1.91966	-2.3384	-2.44303	-1.22249	-0.936895	-1.17226	-1.31855	-1.81347	-1.99189
p-Gab1(Tyr627)=>GAB1	0.113989	0.324106	-1.75102	-1.63703	-2.40182	-2.15305	-1.68341	-1.37221	-2.56317	-2.51635	-1.3993	-1.37844	-1.19835	-0.911529	-1.26009	-1.49061
p-Gab2(Tyr452)=>GAB2	-0.0475944	0.680483	-1.80008	-1.84768	-2.48668	-2.30698	-1.776	-1.7875	-2.81282	-2.92944	-1.02596	-1.14916	-0.949893	-0.529436	-1.74915	-2.38356
p-GSK-3a.b(Ser21.9)GSK-3apreferred=>GSK3B	0.0757191	0.512403	-1.70838	-1.63266	-1.18136	-1.13238	-1.57419	-1.54864	-1.50083	-1.63414	-1.16259	-1.26228	-0.858076	-0.735673	-1.24862	-1.64694
p-GSK-3a(Ser21)=>GSK3A	-0.0723984	0.531068	-1.25428	-1.32668	-1.98965	-1.97657	-1.98341	-1.85551	-2.13042	-2.31116	-1.24372	-1.24597	-1.03602	-0.367407	-1.86708	-2.03937
p-GSK-3b(Ser9)=>GSK3B	0.0505918	0.661578	-2.18109	-2.1305	-2.40896	-2.54697	-2.23611	-2.05466	-2.81254	-3.04201	-1.77364	-1.70406	-1.70806	-1.30455	-2.14724	-2.13075
p-HER2_ErbB2(Tyr1221.1222)=>HER2	-0.0188396	0.870508	-1.37598	-1.39482	-1.09727	-1.23955	-1.58435	-1.41801	-2.54584	-2.7294	-0.86296	-0.981267	-0.713507	-0.324487	-1.45197	-1.67621
p-HER2_ErbB2(Tyr1248)=>HER2	-0.0280174	0.808452	-1.90727	-1.93529	-2.36277	-2.37162	-1.90293	-1.85093	-2.87632	-3.07036	-1.24675	-1.31803	-1.17275	-0.911571	-1.8821	-2.08922
p-HER4_ErbB4(Tyr984)=>ERBB4	0.0639078	0.58031	-1.82734	-1.76343	-2.42354	-2.2822	-1.73542	-1.65431	-2.99423	-2.98322	-1.09896	-1.13801	-0.935347	-0.657291	-1.77653	-1.86556
p-HistoneH2A.X(Ser139)=>H2AFX	0.371216	0.00136068	-1.59421	-1.22299	-2.08131	-1.85672	-1.75053	-1.74922	-1.65965	0.0799792	-1.07468	-1.0067	-1.26285	-1.14631	-1.73623	-1.65897
p-HistoneH3(Ser10)=>HIST1H3A|HIST1H3B|HIST1H3C|HIST1H3D|HIST1H3E|HIST1H3F|HIST1H3G|HIST1H3H|HIST1H3I|HIST1H3J|HIST2H3A|HIST2H3C|HIST2H3D|H3F3A|H3F3B	0.00341894	0.976399	-2.09525	-2.09183	-2.82182	-2.71392	-2.17505	-2.23224	-2.75162	-2.95538	-1.26256	-1.38075	-1.44252	-0.8637	-2.11793	-2.40499
p-HistoneH3(Ser28)=>HIST1H3A|HIST1H3B|HIST1H3C|HIST1H3D|HIST1H3E|HIST1H3F|HIST1H3G|HIST1H3H|HIST1H3I|HIST1H3J|HIST2H3A|HIST2H3C|HIST2H3D|H3F3A|H3F3B	-0.0503335	0.663199	-1.30139	-1.35172	-1.27775	-1.20729	-1.88125	-1.77732	-1.53886	-1.67802	-0.7518	-0.842351	-0.997636	-0.523047	-1.36103	-2.0823
p-HistoneH3(Thr11)=>HIST1H3A|HIST1H3B|HIST1H3C|HIST1H3D|HIST1H3E|HIST1H3F|HIST1H3G|HIST1H3H|HIST1H3I|HIST1H3J|HIST2H3A|HIST2H3C|HIST2H3D|H3F3A|H3F3B	0.195222	0.0914374	-1.91206	-1.71683	-2.50956	-2.35029	-1.7098	-1.64173	-2.95017	-3.02048	-1.24501	-1.15374	-1.21889	-0.933333	-1.83891	-1.20143
p-HistoneH3(Thr3)=>HIST1H3A|HIST1H3B|HIST1H3C|HIST1H3D|HIST1H3E|HIST1H3F|HIST1H3G|HIST1H3H|HIST1H3I|HIST1H3J|HIST2H3A|HIST2H3C|HIST2H3D|H3F3A|H3F3B	-0.0013302	0.990817	-1.89879	-1.90012	-2.58212	-2.54644	-1.96537	-2.02538	-2.7414	-2.95852	-1.12381	-1.12493	-1.14085	-0.714094	-1.83918	-2.03136
p-HSP27(Ser82)=>HSPB1	0.000379732	0.997378	-1.88494	-1.88456	-2.6249	-2.41065	-1.00831	-1.02729	-2.92332	-3.30862	-1.3083	-1.44926	-1.45597	-0.867198	-1.98882	-2.24432
p-IGF-IReceptor(Tyr1131)_InsulinReceptor(Tyr1146)=>IGF1R|INSR	0.0188083	0.870721	-1.82726	-1.80845	-2.56026	-2.46227	-2.02878	-1.82048	-2.35808	-2.71613	-1.30442	-1.34396	-1.11598	-0.757607	-1.59606	-1.75029
p-IGF-IReceptor(Tyr1135.1136)=>IGF1R	0.0406266	0.725198	-1.77202	-1.7314	-2.22701	-2.1879	-1.74067	-1.62836	-2.78588	-2.89827	-1.07563	-1.18336	-1.07279	-0.700672	-1.73016	-1.78981
p-IGF-IReceptor(Tyr980)=>IGF1R	0.135409	0.241512	-1.88476	-1.74935	-2.4637	-2.27203	-1.884	-1.70928	-2.81008	-2.84819	-1.23116	-1.04085	-1.11311	-0.861228	-1.80652	-1.76455
p-IkB-a(Ser32.36)=>NFKBIA	-0.116069	0.315361	-0.620609	-0.736678	-1.408	-1.21603	-0.46297	-0.815047	-0.668712	-1.00679	0.214092	0.0402427	-0.648514	-0.142885	-0.749545	-1.27956
p-IRS-1(Ser307)=>IRS1	0.2401	0.0379836	-2.25808	-2.01798	-2.84582	-2.39077	-1.73829	-1.44997	-3.69407	-3.71275	-1.4587	-1.36151	-1.75857	-2.04071	-2.05303	-1.15216
p-IRS-1(Ser612)=>IRS1	0.0520119	0.652695	-1.79177	-1.73976	-2.41581	-2.43487	-1.74134	-1.90965	-2.26901	-2.30194	-1.30331	-1.23441	-1.30153	-0.929927	-1.71964	-1.62777
p-IRS-1(Ser636.639)=>IRS1	-0.055748	0.629562	-1.61576	-1.67151	-2.18173	-2.08949	-1.55836	-1.74727	-2.16018	-2.62931	-1.06629	-1.00467	-1.15364	-0.554487	-1.57436	-2.00382
p-Jak2(Tyr1007.1008)=>JAK2	0.0420869	0.715743	-1.57251	-1.53042	-2.16165	-2.05268	-1.59161	-1.45324	-2.37587	-2.70297	-0.911199	-0.824191	-0.875691	-0.551472	-1.51904	-1.59799
p-LKB1(Ser428)=>STK11	-0.128055	0.268014	-1.52075	-1.64881	-1.68118	-1.83544	-1.85471	-2.13093	-1.79096	-1.92861	-1.15359	-1.13536	-0.902851	-0.784314	-1.74121	-2.07819
p-LRP6(Ser1490)=>LRP6	-0.0471076	0.683573	-1.54738	-1.59449	-1.68694	-1.54902	-1.72961	-1.74021	-2.42105	-2.54065	-1.03537	-1.08801	-0.875029	-0.517562	-1.53628	-2.13148
p-MAPKAPK-2(Thr222)=>MAPKAPK2	0.0821329	0.477347	-1.68622	-1.60409	-2.16012	-1.9831	-1.83523	-1.39767	-2.47704	-2.43888	-1.14229	-1.37629	-1.12491	-0.713855	-1.37775	-1.71474
p-MAPKAPK-2(Thr334)=>MAPKAPK2	-0.0102232	0.929512	-1.9	-1.91022	-2.54515	-2.40074	-1.62275	-1.7569	-2.80461	-2.92091	-1.2413	-1.45703	-1.35571	-0.86716	-1.83048	-2.05861
p-MARCKS(Ser167.170)=>MARCKS	0.0977218	0.39789	-1.89357	-1.79585	-2.65002	-2.30444	-1.98394	-1.97004	-2.53537	-2.69927	-1.28656	-1.26627	-1.06448	-0.447998	-1.84102	-2.08705
p-MEK1.2(Ser217.221)=>MAP2K1|MAP2K2	-0.0407691	0.724274	-1.80195	-1.84272	-2.48526	-2.36272	-1.70192	-1.72878	-2.21702	-2.71771	-1.34119	-1.46293	-1.41083	-0.880459	-1.6555	-1.90374
p-Met(Tyr1234.1235)=>MET	-0.11493	0.32013	-1.7863	-1.90123	-2.27384	-2.2732	-1.90265	-1.93923	-2.63231	-3.05078	-0.829634	-1.1972	-1.11786	-0.772752	-1.96151	-2.1742
p-MKK3_MKK6(Ser189.207)=>MAP2K3|MAP2K6	0.0745447	0.518964	-1.70205	-1.62751	-2.18246	-2.05679	-1.74394	-1.721	-2.31848	-2.47152	-1.11079	-1.18794	-1.22938	-0.644597	-1.62727	-1.6832
p-Mnk1(Thr197.202)=>MKNK1	-0.108358	0.348572	-1.22949	-1.33785	-2.1632	-1.86205	-1.03303	-1.21928	-2.02682	-2.58064	-1.03307	-1.1165	-0.569317	-0.134648	-0.551511	-1.11397
p-MSK1(Thr581)=>RPS6KA5	0.0187347	0.871222	-2.21089	-2.19216	-2.78949	-2.56527	-1.90954	-1.92233	-3.35432	-3.43606	-1.57178	-1.5575	-1.61694	-1.42123	-2.02328	-2.25055
p-mTOR(Ser2448)=>MTOR	-0.267147	0.0209921	-0.990863	-1.25801	-0.921607	-1.05675	-1.29547	-1.59415	-1.61712	-2.1219	-0.49989	-1.0197	-0.328846	0.0390964	-1.28224	-1.79465
p-MYPT(Ser507)=>MYPT	-0.218101	0.0593885	-0.83301	-1.05111	-0.971147	-1.07587	-0.793958	-1.28464	-0.875413	-1.07769	-0.608946	-0.928096	-0.727989	-0.723294	-1.02061	-1.21707
p-MYPT(Ser668)=>MYPT	-0.15497	0.180166	-1.48614	-1.64111	-1.92145	-1.98212	-1.45937	-1.7127	-1.99241	-2.13321	-0.867116	-1.06518	-1.03036	-0.856755	-1.64613	-2.09669
p-MYPT(Thr853)=>MYPT	-0.0566746	0.62388	-1.912	-1.96868	-2.4479	-2.50585	-2.01607	-2.13046	-2.43708	-2.43963	-1.34218	-1.53277	-1.27873	-0.784978	-1.95007	-2.41839
p-NDRG1(Thr346)=>NDRG1	5.74e-05	0.999603	-2.69307	-2.69301	-3.27511	-3.03096	-2.77351	-2.59328	-3.24095	-3.75155	-2.11392	-2.19161	-2.14445	-1.81504	-2.61046	-2.77562
p-NFkBp65(Ser468)=>RELA	0.0991275	0.391141	-2.0045	-1.90537	-2.57479	-2.258	-2.08194	-1.69228	-2.78376	-3.00242	-1.48739	-1.45969	-1.45062	-1.02231	-1.64846	-1.99752
p-NFkBp65(Ser536)=>RELA	0.026202	0.820644	-1.922	-1.89579	-2.42349	-2.31778	-1.82014	-1.78725	-2.87862	-2.92319	-1.4181	-1.36179	-1.17505	-0.918686	-1.81658	-2.06607
p-NPM(Ser4)=>NPM1	0.0554155	0.631607	-1.64826	-1.59284	-2.11427	-1.84241	-1.63677	-1.4808	-2.46597	-2.61738	-1.16874	-1.229	-1.05759	-0.779868	-1.44622	-1.60759
p-p38MAPK(Thr180.Tyr182)=>MAPK11|MAPK12|MAPK13|MAPK14	0.020427	0.859706	-1.85759	-1.83716	-2.567	-2.24537	-1.85307	-1.96345	-2.43876	-2.16201	-1.28948	-1.33286	-1.17954	-0.677604	-1.81768	-2.64168
p-p44.42MAPkinase(Thr202.Tyr204)=>MAPK1|MAPK3	-0.3347	0.00386051	-1.44207	-1.77677	-2.53546	-2.59627	0.297333	-0.874362	-1.64743	-2.66272	-1.82579	-1.96108	-1.63302	-1.36472	-1.30804	-1.20145
p-p53(Ser15)=>TP53	-0.0833873	0.470647	-0.770811	-0.854198	-1.36884	-1.27341	-0.969494	-1.29167	-0.694289	-0.779047	0.159864	0.39681	-0.780023	-0.50811	-0.972083	-1.66977
p-p53(Ser20)=>TP53	-0.0189212	0.869952	-1.89166	-1.91058	-2.26925	-2.22507	-1.75086	-1.9945	-2.85081	-2.82997	-1.13545	-1.28523	-1.26709	-1.04468	-2.0765	-2.08406
p-p53(Ser37)=>TP53	-0.12836	0.266874	-1.86388	-1.99224	-1.57444	-1.67296	-2.35174	-2.39009	-2.49367	-2.86282	-0.562528	-0.727584	-1.85209	-1.55131	-2.34884	-2.74871
p-p53(Ser392)=>TP53	0.0731808	0.526639	-2.34937	-2.27619	-2.32252	-2.11606	-2.48834	-2.24925	-3.4721	-3.66632	-1.04196	-1.01783	-2.22585	-2.62541	-2.54545	-1.98227
p-p53(Ser46)=>TP53	-0.00956028	0.934072	-1.99014	-1.9997	-2.53129	-2.37941	-1.9749	-2.10227	-2.66311	-2.98106	-1.36366	-1.42864	-1.37708	-0.862295	-2.03078	-2.24451
p-p53(Ser6)=>TP53	0.0034966	0.975863	-1.95042	-1.94693	-2.51509	-2.49361	-2.25954	-1.99773	-2.53911	-2.51651	-1.21481	-1.60403	-1.17158	-0.936292	-2.00242	-2.13338
p-p53(Ser9)=>TP53	-0.00569057	0.960729	-1.61142	-1.61711	-1.72784	-1.83455	-1.78058	-1.72827	-2.17383	-2.20541	-0.948081	-1.17054	-1.1302	-0.788023	-1.90797	-1.97585
p-p70-S6kinase(Thr389)=>RPS6KB1|RPS6KB2	0.0248249	0.829922	-2.37016	-2.34533	-2.95481	-2.85448	-2.50124	-2.20234	-3.21137	-3.44714	-1.55046	-1.84899	-1.71004	-1.30922	-2.29301	-2.40982
p-p90RSK(Ser380)=>RPS6KA1	0.0378812	0.743088	-2.21959	-2.18171	-2.82669	-2.74878	-2.30526	-1.99068	-3.04893	-3.29809	-1.49303	-1.5737	-1.49273	-0.986495	-2.15091	-2.49253
p-p90RSK(Thr359.Ser363)=>RPS6KA1	-0.18428	0.111071	-2.03278	-2.21706	-2.4015	-2.52359	-2.05028	-2.18565	-2.83854	-3.2157	-1.49584	-1.89431	-1.45288	-0.896803	-1.95765	-2.58631
p-p90RSK(Thr573)=>RPS6KA1	0.0232736	0.840402	-2.05943	-2.03616	-2.80672	-2.72474	-2.11828	-1.95774	-2.47683	-2.95357	-1.37149	-1.46391	-1.57644	-0.930349	-2.00683	-2.18664
p-PAK1(Ser144)_PAK2(Ser141)=>PAK1	-0.0852061	0.461027	-1.58052	-1.66572	-1.91724	-1.86192	-1.68811	-1.65737	-2.13141	-2.43304	-0.976836	-1.08374	-1.10713	-0.780688	-1.66238	-2.17758
p-PAK1(Ser199.204)_PAK2(Ser182.197)=>PAK1	0.00911106	0.937163	-1.97029	-1.96118	-2.69871	-2.45362	-2.00157	-1.96167	-2.57039	-2.90665	-1.22832	-1.35304	-1.38785	-0.955689	-1.93489	-2.13639
p-PAK1(Thr423)_PAK2(Thr402)=>PAK1	-0.138137	0.232168	-1.57517	-1.71331	-2.05117	-1.91011	-1.40225	-1.64168	-2.08615	-2.44021	-1.38685	-1.43775	-1.03157	-0.796113	-1.49302	-2.05398
p-PAK2(Ser20)=>PAK2	-0.00301139	0.979212	-1.40053	-1.40354	-1.71276	-1.68832	-1.33154	-1.34948	-1.87605	-2.01662	-1.05676	-1.19532	-1.028	-0.675896	-1.39808	-1.49562
p-PDGFReceptor-b(Tyr1009)=>PDGFRB	-0.0939424	0.416384	-1.46114	-1.55508	-1.96513	-1.86936	-1.66603	-1.5918	-1.78303	-2.27238	-1.19121	-1.32041	-1.10347	-0.83432	-1.05795	-1.44222
p-PDGFReceptor-b(Tyr1021)=>PDGFRB	-0.118346	0.305967	-1.25728	-1.37562	-1.16583	-1.23749	-1.33502	-1.50862	-2.10892	-2.46247	-0.982696	-1.19782	-0.770158	-0.304339	-1.18103	-1.54299
p-PDGFReceptor-b(Tyr740)=>PDGFRB	-0.00140227	0.990319	-1.79902	-1.80043	-2.34013	-2.1481	-1.81904	-1.76036	-2.78237	-3.00739	-1.12042	-0.976347	-1.05668	-0.734976	-1.6755	-2.17538
p-PDGFReceptor-b(Tyr751)=>PDGFRB	0.0543818	0.637981	-1.6473	-1.59292	-2.1373	-1.98737	-1.52475	-1.37409	-2.53042	-2.58992	-1.09395	-0.982777	-1.06945	-0.902196	-1.52792	-1.72115
p-PDGFReceptor-b(Tyr771)=>PDGFRB	0.000530326	0.996339	-1.82702	-1.82649	-2.35775	-2.21948	-1.88332	-1.80653	-2.91832	-2.94889	-0.987635	-1.10699	-0.992332	-0.736387	-1.82276	-2.14067
p-PDK1(Ser241)=>PDK1	-0.109684	0.342708	-0.244265	-0.353948	0.0523161	0.00342414	-0.585266	-0.676657	-0.152003	-0.323165	-0.26641	-0.523174	0.26753	0.369516	-0.781755	-0.973635
p-PKC(pan)bII(Ser660)=>PRKCB	-0.0864773	0.454369	-1.98605	-2.07253	-2.72284	-2.66049	-2.07081	-2.22793	-2.3132	-2.7444	-1.59532	-1.66341	-1.59467	-1.2042	-1.61945	-1.93474
p-PKCa.b(Thr638.641)=>PRKCA|PRKCB	0.00637592	0.956004	-1.48324	-1.47687	-1.95702	-1.82749	-1.40606	-1.44656	-2.61292	-2.86379	-0.768285	-0.912201	-0.790107	-0.256	-1.36507	-1.55515
p-PKCd.th(Ser643.676)=>PRKCD|PRKCQ	-0.0499573	0.665562	-1.02169	-1.07165	-2.39392	-2.30675	-2.18876	-2.07423	-2.69	-2.99504	-1.62069	-1.61817	-1.49596	-1.50783	-2.06989	-2.28325
p-PKCd(Thr505)=>PRKCD	-0.0543417	0.638229	-2.07654	-2.13088	-1.83985	-1.92433	-1.45818	-1.36232	-1.04621	-1.33937	-0.343347	-0.579846	-0.372455	-0.00242353	-1.07012	-1.2216
p-PKCth(Thr538)=>PRKCQ	-0.0411446	0.721839	-1.39019	-1.43133	-1.65484	-1.72784	-1.66209	-1.65804	-1.64582	-1.6849	-0.842196	-0.983003	-0.880967	-0.33969	-1.65522	-2.19453
p-PKCz.l(Thr410.403)=>PRKCZ	0.0249976	0.828757	-1.34315	-1.31816	-1.69513	-1.4879	-1.24878	-1.21448	-2.38049	-2.43398	-0.815136	-0.926046	-0.82087	-0.429178	-1.09852	-1.41735
p-PKD_PKCm(Ser744.748)=>PDK1	0.00532282	0.963265	-1.75691	-1.75159	-2.36019	-2.09568	-1.67666	-1.72157	-2.31978	-2.78133	-1.16167	-1.26052	-1.40675	-0.943952	-1.61642	-1.70647
p-PKD_PKCm(Ser916)=>PDK1	0.303325	0.00880394	-1.79194	-1.48861	-2.40526	-2.14692	-1.87077	-1.34613	-2.56855	-2.54361	-1.16369	-1.08071	-0.999887	-0.4559	-1.74347	-1.35841
p-PKM2(Tyr105)=>PKM2	0.0231369	0.841327	-1.70567	-1.68254	-2.14957	-2.02423	-1.78478	-1.77741	-2.80992	-2.87652	-1.05682	-1.03741	-0.886764	-0.738528	-1.54618	-1.64111
p-PLCg(Tyr1217)=>PLCG1	0.0241779	0.83429	-1.67078	-1.6466	-2.13247	-1.9301	-1.63906	-1.691	-2.8449	-2.86345	-1.05625	-1.09898	-0.980804	-0.741468	-1.37118	-1.55461
p-PLCg(Tyr759)=>PLCG1	-0.00509922	0.964807	-1.79648	-1.80158	-2.25378	-2.24595	-1.80924	-1.71457	-2.8288	-2.98671	-0.985895	-1.13117	-1.04321	-0.791612	-1.85793	-1.93944
p-PLCg(Tyr783)=>PLCG1	-0.0234892	0.838944	-2.15832	-2.18181	-2.6857	-2.64954	-2.06619	-2.06009	-3.24868	-3.20058	-1.42719	-1.64453	-1.53593	-1.31985	-1.98622	-2.21625
p-PRAS40(Thr246)=>AKT1S1	-0.281347	0.0150812	-1.88915	-2.1705	-1.93439	-2.64093	-1.82311	-1.90048	-2.61644	-3.46877	-1.50456	-1.59921	-1.28461	-1.30364	-2.17179	-2.10995
p-PTEN(Ser380)=>PTEN	0.0343113	0.766558	-1.70969	-1.67538	-2.3999	-2.20459	-1.75393	-1.85433	-2.67783	-2.90969	-0.945085	-0.949223	-0.861835	-0.444877	-1.61959	-1.6896
p-Raptor(Ser792)=>RPTOR	-0.106268	0.35794	-1.22936	-1.33563	-1.55338	-1.46088	-1.41864	-1.49451	-1.41869	-1.74715	-0.913326	-1.02995	-0.976863	-0.654684	-1.09526	-1.62661
p-Rb(Ser780)=>RB1	-0.0962999	0.404789	-0.509145	-0.605445	-2.47552	-2.34749	0.523052	0.312831	-0.38494	-0.737321	0.17647	0.185187	-0.440496	-0.363942	-0.453432	-0.681932
p-Rb(Ser795)=>RB2	-0.135656	0.240657	-2.10185	-2.23751	-2.82098	-2.80664	-2.08936	-1.97656	-2.78593	-3.27812	-1.38271	-1.64921	-1.52914	-0.907022	-2.00299	-2.80749
p-Rb(Ser807.811)=>RB3	-0.0517495	0.654333	-0.375875	-0.427624	-2.73209	-2.42371	0.627427	0.484063	-0.112379	-0.311488	0.435248	0.219672	-0.381642	-0.126454	-0.0918106	-0.407832
p-RelB(Ser552)=>RELB	-0.0047358	0.967314	-1.8591	-1.86383	-2.44598	-2.35161	-1.92065	-1.71936	-2.10775	-2.58892	-1.49235	-1.54162	-1.46139	-1.26776	-1.72646	-1.71374
p-Ret(Tyr905)=>RET	-0.0493393	0.669452	-2.04259	-2.09193	-2.60203	-2.58587	-2.01411	-2.04589	-3.29718	-3.45899	-1.28297	-1.3403	-1.15734	-0.86761	-1.90192	-2.25293
p-RSK2(Ser227)=>RPS6KA3	0.132171	0.252945	-2.24147	-2.1093	-2.97936	-2.69557	-2.29291	-2.05194	-3.03405	-3.13844	-1.61441	-1.56996	-1.40822	-1.13818	-2.11984	-2.06168
p-RSK3(Thr356.Ser360)=>RPS6KA2	-0.0233767	0.839705	-1.78376	-1.80714	-2.38429	-2.11769	-1.72293	-1.71514	-2.70632	-2.85326	-1.30275	-1.32422	-1.17769	-1.12117	-1.40861	-1.71136
p-S6Rb(Ser235.236)=>RPS6	-2.06642	1.73e-43	-0.0869246	-2.28593	-0.481344	-2.79721	-0.854108	-2.3902	0.0157394	nd	0.588236	-2.05493	-0.13085	-1.9014	0.34078	nd
p-SAPK_JNK(Thr183.Tyr185)=>MAPK8	0.0712465	0.537621	-2.03695	-1.9657	-2.74333	-2.55189	-2.11163	-2.08456	-2.63644	-2.91646	-1.29879	-1.2796	-1.31526	-0.877093	-2.11623	-2.0846
p-SEK1_MKK4(Thr261)=>MAP2K4	0.0155088	0.893249	-1.69393	-1.67842	-2.43189	-2.14674	-1.80808	-1.79778	-2.44766	-2.8252	-0.851771	-0.841052	-0.897727	-0.451484	-1.72642	-2.00824
p-Shc(Tyr239)=>SHC1	-0.140623	0.223879	-0.053086	-0.193709	-0.313341	-0.0419313	-0.0328167	-0.396269	-0.173627	-0.670177	-0.148257	-0.765337	-0.154884	0.335303	0.504409	0.376158
p-Shc(Tyr317)=>SHC1	0.175031	0.130145	-1.30311	-1.12808	-2.08153	-1.74837	-1.47705	-1.36284	-1.65051	-1.82901	-1.34376	-1.12994	-0.702707	-0.202562	-0.56311	-0.49577
p-SHIP2(Tyr1135)=>INPPL1	-0.0962063	0.405245	-1.19587	-1.29207	-1.80286	-1.63935	-1.13351	-1.36203	-1.83586	-2.19273	-0.592187	-0.970246	-0.616013	-0.213373	-1.19476	-1.37469
p-SHP-2(Tyr580)=>INPPL1	-0.0216011	0.851733	-1.55687	-1.57847	-2.15816	-1.87663	-1.56618	-1.57322	-2.52796	-2.67552	-0.994308	-1.01064	-0.80547	-0.648419	-1.28911	-1.68637
p-Smad1.5(Ser463.465)=>SMAD1	-0.0684935	0.553449	-1.59949	-1.66798	-1.99231	-1.9702	-1.74633	-1.58799	-2.56441	-2.77274	-0.836819	-1.04805	-0.957659	-0.557524	-1.49938	-2.07137
p-Smad2(Ser465.467)=>SMAD2	0.0224259	0.846141	-1.82419	-1.80176	-2.2515	-2.14053	-1.86786	-1.75568	-2.65901	-2.904	-1.21606	-1.16156	-1.18109	-0.916831	-1.76959	-1.93196
p-Smad3(Ser423.425)=>SMAD3	-0.323805	0.00517868	-0.676115	-0.99992	-1.26035	-1.37622	-0.428728	-1.0374	-1.03189	-1.67065	-0.0468628	-0.726175	-0.697618	-0.328724	-0.591231	-0.860358
p-Src(Tyr527)=>SRC	0.0213586	0.853379	-1.94091	-1.91955	-2.5536	-2.57386	-2.12593	-1.91539	-3.07556	-3.2512	-1.20903	-1.18193	-1.05307	-0.599089	-1.62828	-1.99585
p-SrcFamily(Tyr416)=>SRC	0.0456275	0.693	-0.393213	-0.347585	-0.173509	0.351714	-0.983154	-1.09961	0.0500173	-0.273636	-0.349513	-0.312833	0.193224	0.560965	-1.09634	-1.31211
p-Stat1(Tyr701)=>STAT1	-0.0309355	0.788952	-2.70337	-2.73431	-3.25287	-3.05368	-2.69257	-2.82978	-3.15305	-3.34994	-2.48203	-2.43582	-2.12838	-1.93483	-2.51132	-2.80178
p-Stat2(Tyr690)=>STAT2	-0.00213476	0.985263	-1.79604	-1.79817	-2.36762	-2.22179	-1.78396	-1.90664	-2.80786	-2.983	-1.01338	-1.0854	-1.00486	-0.757975	-1.79853	-1.83421
p-Stat3(Ser727)=>STAT3	0.0260407	0.82173	-1.56155	-1.53551	-1.89872	-1.7332	-1.68598	-1.54691	-2.60385	-2.77774	-0.927134	-0.718417	-0.793189	-0.657277	-1.46044	-1.77952
p-Stat3(Tyr705)=>STAT3	-0.16335	0.15776	-2.62794	-2.79129	-3.63421	-3.52163	-3.11058	-3.03825	-3.96275	-4.15507	-1.12551	-1.46637	-1.36278	-1.37824	-2.57179	-3.18816
p-Stat5(Tyr694)=>STAT5A|STAT5B	-0.00112826	0.992211	-1.92732	-1.92845	-2.32262	-2.13197	-1.93107	-1.96326	-2.93125	-3.1621	-1.16815	-1.33604	-1.32866	-0.880486	-1.88218	-2.09685
p-Stat6(Tyr641)=>STAT6	-0.0815564	0.480443	-1.47351	-1.55507	-1.6939	-1.66423	-1.42647	-1.47678	-2.3374	-2.61378	-1.02113	-1.05765	-0.989704	-0.629656	-1.37246	-1.8883
p-Syk(Tyr323)=>SRC	0.07257	0.530094	-1.349	-1.27643	-1.12896	-0.959431	-1.54257	-1.25573	-2.40275	-2.40162	-1.11043	-1.12206	-0.815519	-0.685407	-1.09376	-1.23432
p-Syk(Tyr525.526)=>SYK	-0.0277953	0.809941	-1.08253	-1.11032	-1.78139	-1.68572	-1.24977	-1.43575	-1.00638	-1.38574	-0.941507	-0.882665	-0.632495	-0.202656	-0.883632	-1.06941
p-TACC3(Ser558)=>TACC3	0.06118	0.596573	-1.86945	-1.80827	-2.47615	-2.30662	-2.00426	-1.69691	-2.57532	-2.89096	-1.10455	-1.21518	-1.29768	-0.717103	-1.75876	-2.02288
p-TAK1(Thr184.187)=>MAP3K7	0.0597799	0.605001	-1.81132	-1.75154	-2.36601	-2.04393	-1.8138	-1.6696	-2.55133	-2.66185	-1.28117	-1.08542	-1.18416	-1.02492	-1.67148	-2.02355
p-TBK1_NAK(Ser172)=>TBK1	0.11916	0.302654	-1.79049	-1.67133	-2.43565	-2.1712	-1.88716	-1.58176	-2.5339	-2.63071	-1.14595	-1.19815	-1.10948	-0.741301	-1.63081	-1.70487
p-Tuberin_TSC2(Ser939)=>TSC2	-0.0798747	0.489537	-0.888615	-0.96849	-1.07591	-1.08651	-0.867132	-0.902795	-1.31397	-1.39954	-0.536989	-0.577699	-0.627353	-0.506406	-0.910345	-1.338
p-Tuberin_TSC2(Thr1462)=>TSC2	0.0684701	0.553585	-1.58291	-1.51444	-2.11064	-1.85353	-1.6801	-1.40352	-2.4168	-2.56869	-1.04323	-0.974839	-0.849833	-0.52549	-1.39684	-1.76056
p-Tuberin_TSC2(Tyr1571)=>TSC2	-0.0245729	0.831623	-1.40483	-1.42941	-1.41256	-1.395	-1.58569	-1.47361	-2.1809	-2.28837	-1.0339	-1.02947	-0.819231	-0.590191	-1.39673	-1.7998
p-Tyk2(Tyr1054.1055)=>TYK2	-0.0152129	0.895275	-1.3346	-1.34981	-1.80278	-1.72687	-1.28545	-1.40694	-2.2199	-2.42615	-0.766088	-0.690305	-0.637794	-0.403585	-1.29556	-1.445
p-VASP(Ser157)=>VASP	0.0212472	0.854135	-1.41159	-1.39034	-1.90828	-1.90776	-1.96559	-1.83066	-1.56858	-1.63448	-0.694765	-0.840789	-0.701547	-0.347338	-1.6308	-1.78104
p-VASP(Ser239)=>VASP	-0.0638979	0.580369	-1.5059	-1.5698	-1.95844	-1.79852	-1.84021	-2.01678	-1.8696	-2.04173	-0.887248	-1.03211	-0.853099	-0.546406	-1.62681	-1.98326
p-VEGFReceptor2(Tyr1059)=>KDR	-0.00990061	0.931731	-1.33198	-1.34188	-1.93308	-1.7632	-1.3121	-1.41589	-2.21175	-2.3787	-0.726224	-0.8019	-0.482715	-0.205751	-1.32598	-1.48582
p-VEGFReceptor2(Tyr1175)=>KDR	-0.0133768	0.907854	-1.45085	-1.46423	-2.22975	-2.12353	-1.69207	-1.66688	-2.29187	-2.43814	-1.13147	-1.08133	-0.531334	-0.258066	-0.828628	-1.21743
p-VEGFReceptor2(Tyr951)=>KDR	0.0643711	0.577569	-1.77195	-1.70758	-2.27698	-2.02366	-1.71492	-1.86296	-2.68062	-2.83215	-1.0548	-0.928586	-1.0511	-0.766137	-1.85327	-1.83199
p-Wee1(Ser642)=>WEE1	-0.110936	0.337226	-1.26189	-1.37283	-0.967605	-1.19279	-1.18625	-1.41714	-1.39305	-1.55044	-1.03595	-1.37593	-1.31054	-0.917079	-1.67797	-1.7836
p-Zap-70(Tyr319)_Syk(Tyr352)=>ZAP70|SYK	0.0950114	0.411102	-0.961473	-0.866462	-1.18521	-0.918575	-0.898893	-0.713889	-2.25074	-2.38909	-1.00454	-1.04488	-0.598332	-0.206584	0.168869	0.0742432
